# Supplementary material for: In silico development of a cross-protective, multiepitope Salmonella vaccine against clinically- relevant and poultry-associated serovars
Source: Research Square preprint supplement (doi:10.21203/rs.3.rs-7705248/v1), 2025-12-02
Supplement: Supplementary file 2 [file 60cf15d63f5b192fcc73c9c6.xlsx]

## Sheet: Accession Numbers Table 1
Accession Table 1: NCBI accessions of Salmonella proteins with high sequence similarity to query proteins
Query NCBI Protein Accession Number1	Subject NCBI Protein Accession Number2	Subject Protein Name
AEF05955.1	WP_000743357.1	MULTISPECIES: fimbrial protein BcfA
AEF05955.1	EAQ6117900.1	fimbrial protein BcfA
AEF05955.1	WP_039590273.1	fimbrial protein BcfA
AEF05955.1	EIB4626750.1	fimbrial protein BcfA
AEF05955.1	EIB4741952.1	fimbrial protein BcfA
AEF05955.1	EBM7922013.1	fimbrial protein BcfA
AEF05955.1	WP_031623426.1	fimbrial protein BcfA, partial
AEF05955.1	ECL0654767.1	fimbrial protein BcfA
AEF05955.1	WP_042781113.1	fimbrial protein BcfA, partial
AEF05955.1	EEM3002208.1	fimbrial protein BcfA
AEF05955.1	KDU72824.1	fimbrial protein BcfA, partial
AEF05955.1	MBD6399943.1	fimbrial protein BcfA
AEF05955.1	ACF66380.1	fimbrial subunit
AEF05955.1	EFV4010640.1	fimbrial protein BcfA
AEF05955.1	WP_065312550.1	fimbrial protein BcfA, partial
AEF05955.1	EAM6917780.1	fimbrial protein BcfA
AEF05955.1	EAU8881432.1	fimbrial protein BcfA
AEF05955.1	WP_001584487.1	fimbrial protein BcfA
AEF05955.1	KNB38877.1	fimbrial protein, partial
AEF05955.1	EDQ2701223.1	fimbrial protein BcfA
AEF05955.1	EFT9296431.1	fimbrial protein BcfA
AEF05955.1	EJB1296037.1	fimbrial protein BcfA
AEF05955.1	CPR49642.1	fimbrial chaperone
AEF05955.1	EBC6449105.1	fimbrial protein BcfA
AEF05955.1	WP_020839621.1	fimbrial protein BcfA
AEF05955.1	WP_109266969.1	fimbrial protein BcfA
AEF05955.1	EAU7905371.1	fimbrial protein BcfA
AEF05955.1	EBX8441361.1	fimbrial protein
AEF05955.1	ECO3832155.1	fimbrial protein BcfA
AEF05955.1	EJM8757472.1	fimbrial protein BcfA
AEF05955.1	EBY1766981.1	fimbrial protein
AEF05955.1	EHB3806823.1	fimbrial protein BcfA
AEF05955.1	EBE6909700.1	fimbrial protein BcfA
AEF05955.1	WP_023232154.1	MULTISPECIES: fimbrial protein BcfA
AEF05955.1	HAD8936990.1	fimbrial protein BcfA
AEF05955.1	EGV0310611.1	fimbrial protein BcfA
AEF05955.1	WP_080189468.1	fimbrial protein BcfA
AEF05955.1	EBY5104178.1	fimbrial protein BcfA
AEF05955.1	EJG8629642.1	fimbrial protein BcfA
AEF05955.1	EBZ0424197.1	fimbrial protein BcfA
AEF05955.1	ECI4084673.1	fimbrial protein
AEF05955.1	EED5354087.1	fimbrial protein BcfA
AEF05955.1	EBZ5973742.1	fimbrial protein BcfA
AEF05955.1	EIT6556867.1	fimbrial protein BcfA
AEF05955.1	EAO0387303.1	fimbrial protein BcfA
AEF05955.1	QIL06327.1	fimbrial protein BcfA
AEF05955.1	EDY0204736.1	fimbrial protein BcfA
AEF05955.1	EEK2930239.1	fimbrial protein BcfA
AEF05955.1	ECF3922365.1	fimbrial protein BcfA
AEF05955.1	EJX8874499.1	fimbrial protein BcfA
AEF05955.1	WP_000743356.1	fimbrial protein BcfA
AEF05955.1	EHE2737514.1	fimbrial protein BcfA
AEF05955.1	EGY3943660.1	fimbrial protein BcfA
AEF05955.1	EBX5571301.1	fimbrial protein
AEF05955.1	HCC1169228.1	fimbrial protein BcfA
AEF05955.1	ECC9471609.1	fimbrial protein
AEF05955.1	EBM8666735.1	fimbrial protein BcfA
AEF05955.1	EBA3386791.1	fimbrial protein BcfA
AEF05955.1	EJL1294099.1	fimbrial protein BcfA
AEF05955.1	HAO7897279.1	fimbrial protein BcfA
AEF05955.1	WP_058648977.1	fimbrial protein BcfA
AEF05955.1	ECQ0060771.1	fimbrial protein BcfA
AEF05955.1	EGT8715046.1	fimbrial protein BcfA
AEF05955.1	WP_064034936.1	fimbrial protein BcfA
AEF05955.1	WP_203436530.1	fimbrial protein BcfA
AEF05955.1	EBL6921832.1	fimbrial protein BcfA
AEF05955.1	EDD4283978.1	fimbrial protein BcfA
AEF05955.1	EAY0898847.1	fimbrial protein BcfA
AEF05955.1	WP_080187254.1	fimbrial protein BcfA
AEF05955.1	EDR9332810.1	fimbrial protein BcfA
AEF05955.1	EEJ4413896.1	fimbrial protein BcfA
AEF05955.1	WP_272711113.1	fimbrial protein BcfA
AEF05955.1	EBX9461748.1	fimbrial protein
AEF05955.1	EEB6666449.1	fimbrial protein BcfA
AEF05955.1	EBE6170377.1	fimbrial protein BcfA
AEF05955.1	WP_057519782.1	fimbrial protein BcfA
AEF05955.1	EIU6491307.1	fimbrial protein BcfA
AEF05955.1	EHN9637140.1	fimbrial protein BcfA
AEF05955.1	EBR1859193.1	fimbrial protein BcfA
AEF05955.1	MBZ4899828.1	fimbrial protein BcfA
AEF05955.1	EBX6374958.1	fimbrial protein
AEF05955.1	EBP2451802.1	fimbrial protein BcfA
AEF05955.1	EGQ5111094.1	fimbrial protein BcfA
AEF05955.1	EEO9800381.1	fimbrial protein BcfA
AEF05955.1	ECA7930991.1	fimbrial protein BcfA
AEF05955.1	EBG3521240.1	fimbrial protein BcfA
AEF05955.1	EGB1621891.1	fimbrial protein BcfA
AEF05955.1	ECF7522596.1	fimbrial protein BcfA
AEF05955.1	EBV0992660.1	fimbrial protein
AEF05955.1	EAA1022184.1	fimbrial protein
AEF05955.1	EAS2702822.1	fimbrial protein
AEF05955.1	EAW9114622.1	fimbrial protein BcfA
AEF05955.1	ECW3180812.1	fimbrial protein BcfA
AEF05955.1	ECI3885861.1	fimbrial protein
AEF05955.1	EBA9137588.1	fimbrial protein BcfA
AEF05955.1	EAW3441567.1	fimbrial protein BcfA
AEF05955.1	ECP8183861.1	fimbrial protein BcfA
AEF05955.1	EFP5115750.1	fimbrial protein BcfA
AEF05955.1	WP_079950865.1	fimbrial protein BcfA
AEF05955.1	ECP8438016.1	fimbrial protein BcfA
AEF05955.1	EJU8469186.1	fimbrial protein BcfA
AEF05955.1	ECW3653017.1	fimbrial protein BcfA
AEF05955.1	WP_057525320.1	fimbrial protein BcfA
AEF05955.1	EBS0725986.1	fimbrial protein
AEF05955.1	EBQ9069050.1	fimbrial protein
AEF05955.1	ECR5291225.1	fimbrial protein BcfA
AEF05955.1	WP_080245694.1	fimbrial protein BcfA
AEF05955.1	WP_129468127.1	fimbrial protein BcfA
AEF05955.1	ECJ4458736.1	fimbrial protein BcfA
AEF05955.1	EAM1680590.1	fimbrial protein BcfA
AEF05955.1	EEK8809043.1	fimbrial protein BcfA
AEF05955.1	ECM0206280.1	fimbrial protein BcfA
AEF05955.1	EFC2057719.1	fimbrial protein BcfA
AEF05955.1	ECS6200024.1	fimbrial protein BcfA
AEF05955.1	EIO1292430.1	fimbrial protein BcfA
AEF05955.1	EBM5181797.1	fimbrial protein BcfA
AEF05955.1	EBN4349424.1	fimbrial protein
AEF05955.1	EIF1080241.1	fimbrial protein BcfA
AEF05955.1	EBI3275591.1	fimbrial protein
AEF05955.1	EAP6759147.1	fimbrial protein BcfA
AEF05955.1	EBB5938782.1	fimbrial protein BcfA
AEF05955.1	EAS3607322.1	fimbrial protein BcfA
AEF05955.1	EGG9672901.1	fimbrial protein BcfA
AEF05955.1	EAW0863754.1	fimbrial protein BcfA
AEF05955.1	EBH5838488.1	fimbrial protein BcfA
AEF05955.1	EBA4414266.1	fimbrial protein BcfA
AEF05955.1	EAP6085948.1	fimbrial protein BcfA
AEF05955.1	EAC0958414.1	fimbrial protein BcfA
AEF05955.1	EBR5126604.1	fimbrial protein BcfA
AEF05955.1	EAA1374476.1	fimbrial protein
AEF05955.1	WP_114052970.1	fimbrial protein BcfA
AEF05955.1	EAR9881084.1	fimbrial protein BcfA
AEF05955.1	EJT1095671.1	fimbrial protein BcfA
AEF05955.1	WP_000743355.1	MULTISPECIES: fimbrial protein BcfA
AEF05955.1	EAP3459268.1	fimbrial protein BcfA
AEF05955.1	ECK4009723.1	fimbrial protein BcfA
AEF05955.1	EAV4453834.1	fimbrial protein BcfA
AEF05955.1	HAU2873720.1	fimbrial protein BcfA
AEF05955.1	HBK1115938.1	fimbrial protein BcfA
AEF05955.1	EIX4064749.1	fimbrial protein BcfA
AEF05955.1	HBI5202081.1	fimbrial protein BcfA
AEF05955.1	EGG8022469.1	fimbrial protein BcfA
AEF05955.1	EAO4553160.1	fimbrial protein BcfA
AEF05955.1	ECE2238383.1	fimbrial protein BcfA
AEF05955.1	HBK8691542.1	fimbrial protein BcfA
AEF05955.1	EIS3775843.1	fimbrial protein BcfA
AEF05955.1	EGU2929953.1	fimbrial protein BcfA
AEF05955.1	EAR1813911.1	fimbrial protein BcfA
AEF05955.1	EHY9927026.1	fimbrial protein BcfA
AEF05955.1	ECZ9443077.1	fimbrial protein BcfA
AEF05955.1	EBU4180327.1	fimbrial protein BcfA
AEF05955.1	WP_001538896.1	fimbrial protein BcfA
AEF05955.1	EGJ4011244.1	fimbrial protein BcfA
AEF05955.1	HAO8213104.1	fimbrial protein BcfA
AEF05955.1	ECJ1127370.1	fimbrial protein BcfA
AEF05955.1	WP_079900643.1	fimbrial protein BcfA
AEF05955.1	EBM9899053.1	fimbrial protein BcfA
AEF05955.1	EBY1552545.1	fimbrial protein
AEF05955.1	ECO2239823.1	fimbrial protein BcfA
AEF05955.1	ECP2816576.1	fimbrial protein BcfA
AEF05955.1	ECI7780547.1	fimbrial protein BcfA
AEF05955.1	HAA0927970.1	fimbrial protein BcfA
AEF05955.1	EAB5017297.1	fimbrial protein BcfA
AEF05955.1	EDJ1145073.1	fimbrial protein
AEF05955.1	EBR0194763.1	fimbrial protein
AEF05955.1	WP_108711030.1	fimbrial protein BcfA
AEF05955.1	EJB1229495.1	fimbrial protein BcfA
AEF05955.1	HCB4465006.1	fimbrial protein BcfA
AEF05955.1	EEH1561787.1	fimbrial protein BcfA
AEF05955.1	EJH2291838.1	fimbrial protein BcfA
AEF05955.1	EHC7587646.1	fimbrial protein BcfA
AEF05955.1	EBY8743482.1	fimbrial protein BcfA
AEF05955.1	EAR2807920.1	fimbrial protein BcfA
AEF05955.1	WP_079822356.1	fimbrial protein BcfA
AEF05955.1	EAO5407347.1	fimbrial protein BcfA
AEF05955.1	EJX8418107.1	fimbrial protein BcfA
AEF05955.1	EBN6909506.1	fimbrial protein
AEF05955.1	EHM1259547.1	fimbrial protein BcfA
AEF05955.1	EBW4465108.1	fimbrial protein
AEF05955.1	WP_126524304.1	MULTISPECIES: fimbrial protein BcfA
AEF05955.1	WP_024155409.1	fimbrial protein BcfA
AEF05955.1	ECH5601283.1	fimbrial protein BcfA
AEF05955.1	EAU0332255.1	fimbrial protein BcfA
AEF05955.1	EBY8302018.1	fimbrial protein BcfA
AEF05955.1	EBV2540644.1	fimbrial protein
AEF05955.1	WP_185860267.1	fimbrial protein BcfA
AEF05955.1	EBU8261930.1	fimbrial protein
AEF05955.1	ECP5757326.1	fimbrial protein BcfA
AEF05955.1	EIN3674767.1	fimbrial protein BcfA
AEF05955.1	EEP8371770.1	fimbrial protein BcfA
AEF05955.1	EIJ8225647.1	fimbrial protein BcfA
AEF05955.1	EJK1026462.1	fimbrial protein BcfA
AEF05955.1	EBQ9379021.1	fimbrial protein
AEF05955.1	HAE4078325.1	fimbrial protein BcfA
AEF05955.1	ECA6788229.1	fimbrial protein BcfA
AEF05955.1	ECM5321153.1	fimbrial protein BcfA
AEF05955.1	EAO9319147.1	fimbrial protein BcfA
AEF05955.1	EJV6191502.1	fimbrial protein BcfA
AEF05955.1	WP_080111561.1	fimbrial protein BcfA
AEF05955.1	EBH4471835.1	fimbrial protein BcfA
AEF05955.1	EAQ5529801.1	fimbrial protein BcfA
AEF05955.1	EID1116297.1	fimbrial protein BcfA
AEF05955.1	WP_079960240.1	fimbrial protein BcfA
AEF05955.1	EDW0086126.1	fimbrial protein BcfA
AEF05955.1	ECI4577235.1	fimbrial protein
AEF05955.1	EBG5896487.1	fimbrial protein BcfA
AEF05955.1	EFT5670444.1	fimbrial protein BcfA
AEF05955.1	EBR8930062.1	fimbrial protein
AEF05955.1	EAB2262396.1	fimbrial protein BcfA
AEF05955.1	WP_281773852.1	fimbrial protein BcfA
AEF05955.1	EIS1047455.1	fimbrial protein BcfA
AEF05955.1	EIQ2948289.1	fimbrial protein BcfA
AEF05955.1	EAA3923872.1	fimbrial protein
AEF05955.1	WP_206225892.1	fimbrial protein BcfA
AEF05955.1	EAM6221177.1	fimbrial protein BcfA
AEF05955.1	EAM5990349.1	fimbrial protein BcfA
AEF05955.1	EHQ8413839.1	fimbrial protein BcfA
AEF05955.1	EEL4547741.1	fimbrial protein BcfA
AEF05955.1	EDU3512332.1	fimbrial protein BcfA
AEF05955.1	WP_183056109.1	fimbrial protein BcfA
AEF05955.1	ECG3924522.1	fimbrial protein BcfA
AEF05955.1	EBN1095511.1	fimbrial protein BcfA
AEF05955.1	WP_110285759.1	fimbrial protein BcfA
AEF05955.1	EFZ9426930.1	fimbrial protein BcfA
AEF05955.1	EFB6985170.1	fimbrial protein BcfA
AEF05955.1	ECD4597905.1	fimbrial protein BcfA
AEF05955.1	WP_137987043.1	fimbrial protein BcfA
AEF05955.1	EIC5685975.1	fimbrial protein BcfA
AEF05955.1	WP_110407168.1	fimbrial protein BcfA
AEF05955.1	EJQ3615896.1	fimbrial protein BcfA
AEF05955.1	EAT8264058.1	fimbrial protein BcfA
AEF05955.1	ECS9036219.1	fimbrial protein
AEF05955.1	EDU5478536.1	fimbrial protein BcfA
AEF05955.1	EBU9880546.1	fimbrial protein
AEF05955.1	ECQ9983137.1	fimbrial protein BcfA
AEF05955.1	WP_050956007.1	fimbrial protein BcfA
AEF05955.1	WP_122031248.1	fimbrial protein BcfA
AEF05955.1	EAB9326050.1	fimbrial protein BcfA
AEF05955.1	EFS5507928.1	fimbrial protein BcfA
AEF05955.1	EEG3692959.1	fimbrial protein BcfA
AEF05955.1	EIA2913427.1	fimbrial protein BcfA
AEF05955.1	WP_094884436.1	fimbrial protein BcfA
AEF05955.1	EEG1525252.1	fimbrial protein BcfA
AEF05955.1	EBO9306602.1	fimbrial protein BcfA
AEF05955.1	EAM9977348.1	fimbrial protein BcfA
AEF05955.1	EBR2528606.1	fimbrial protein BcfA
AEF05955.1	EEG3722563.1	fimbrial protein BcfA
AEF05955.1	EJI0008060.1	fimbrial protein BcfA
AEF05955.1	EBM3943793.1	fimbrial protein BcfA
AEF05955.1	EEN5141561.1	fimbrial protein BcfA
AEF05955.1	EGJ4663324.1	fimbrial protein BcfA
AEF05955.1	EAB7277136.1	fimbrial protein BcfA
AEF05955.1	EAS5637607.1	fimbrial protein BcfA
AEF05955.1	EAW0637521.1	fimbrial protein BcfA
AEF05955.1	EBL0086010.1	fimbrial protein
AEF05955.1	EJG3240522.1	fimbrial protein BcfA
AEF05955.1	EGM7162103.1	fimbrial protein BcfA
AEF05955.1	WP_260812511.1	fimbrial protein BcfA, partial
AEF05955.1	EGW1628490.1	fimbrial protein BcfA
AEF05955.1	EIP1508589.1	fimbrial protein BcfA
AEF05955.1	EJQ9434935.1	fimbrial protein BcfA
AEF05955.1	WP_259391864.1	fimbrial protein BcfA, partial
AEF05955.1	WP_053451430.1	fimbrial protein BcfA
AEF05955.1	WP_260816009.1	fimbrial protein BcfA, partial
AEF05955.1	EIJ9367418.1	fimbrial protein BcfA
AEF05955.1	EIJ9289441.1	fimbrial protein BcfA
AEF05955.1	EIJ8816639.1	fimbrial protein BcfA
AEF05955.1	HCI4550209.1	fimbrial protein BcfA
AEF05955.1	EJA0673229.1	fimbrial protein BcfA
AEF05955.1	EHF6446927.1	fimbrial protein BcfA
AEF05955.1	HCC5414966.1	fimbrial protein BcfA
AEF05955.1	EAP9427111.1	fimbrial protein BcfA
AEF05955.1	EAZ2418811.1	fimbrial protein BcfA
AEF05955.1	EAP8669672.1	fimbrial protein BcfA
AEF05955.1	EAM1243561.1	fimbrial protein BcfA
AEF05955.1	EAT2981034.1	fimbrial protein BcfA
AEF05955.1	EBJ3781484.1	fimbrial protein
AEF05955.1	EAO1261988.1	fimbrial protein BcfA
AEF05955.1	EEJ3929533.1	fimbrial protein BcfA
AEF05955.1	WP_109909558.1	fimbrial protein BcfA
AEF05955.1	HCJ4741085.1	fimbrial protein BcfA
AEF05955.1	EAS7753647.1	fimbrial protein BcfA
AEF05955.1	EAB2533643.1	fimbrial protein BcfA
AEF05955.1	EDQ6124183.1	fimbrial protein BcfA
AEF05955.1	ECO4475247.1	fimbrial protein BcfA
AEF05955.1	EDT7392107.1	fimbrial protein BcfA
AEF05955.1	WP_114047370.1	fimbrial protein BcfA
AEF05955.1	WP_046783690.1	fimbrial protein BcfA
AEF05955.1	EHL3948131.1	fimbrial protein BcfA
AEF05955.1	WP_079825772.1	fimbrial protein BcfA
AEF05955.1	EBK9263137.1	fimbrial protein
AEF05955.1	WP_001628065.1	fimbrial protein BcfA
AEF05955.1	WP_221583002.1	fimbrial protein BcfA
AEF05955.1	MBJ5783629.1	fimbrial protein BcfA
AEF05955.1	EJR2837085.1	fimbrial protein BcfA
AEF05955.1	EBX3649095.1	fimbrial protein
AEF05955.1	EJW0384145.1	fimbrial protein BcfA
AEF05955.1	EFQ7339043.1	fimbrial protein BcfA
AEF05955.1	EGN1950483.1	fimbrial protein BcfA
AEF05955.1	EHS2063292.1	fimbrial protein BcfA
AEF05955.1	WP_023220580.1	fimbrial protein BcfA
AEF05955.1	EDA3733777.1	fimbrial protein BcfA
AEF05955.1	EBO9653529.1	fimbrial protein BcfA
AEF05955.1	EBX7759274.1	fimbrial protein
AEF05955.1	EAA9403148.1	fimbrial protein BcfA
AEF05955.1	EAZ5603449.1	fimbrial protein BcfA
AEF05955.1	EBE8581142.1	fimbrial protein BcfA
AEF05955.1	WP_131046628.1	fimbrial protein BcfA
AEF05955.1	EEA8305627.1	fimbrial protein BcfA
AEF05955.1	EBY7876141.1	fimbrial protein BcfA
AEF05955.1	EHK0054426.1	fimbrial protein BcfA
AEF05955.1	EBY6994966.1	fimbrial protein BcfA
AEF05955.1	EBO9667411.1	fimbrial protein BcfA
AEF05955.1	ECJ2622098.1	fimbrial protein BcfA
AEF05955.1	EAV3672831.1	fimbrial protein BcfA
AEF05955.1	EBE8900785.1	fimbrial protein BcfA
AEF05955.1	EEK8484206.1	fimbrial protein BcfA
AEF05955.1	EAN0639270.1	fimbrial protein BcfA
AEF05955.1	EBX3778562.1	fimbrial protein
AEF05955.1	EEB1771192.1	fimbrial protein BcfA
AEF05955.1	EDE6978691.1	fimbrial protein BcfA
AEF05955.1	ECA5023051.1	fimbrial protein BcfA
AEF05955.1	WP_085411332.1	fimbrial protein BcfA
AEF05955.1	EGL6688038.1	fimbrial protein BcfA
AEF05955.1	HAD4625777.1	fimbrial protein BcfA
AEF05955.1	EGH6823034.1	fimbrial protein BcfA
AEF05955.1	EHX6161095.1	fimbrial protein BcfA
AEF05955.1	WP_000743353.1	fimbrial protein BcfA
AEF05955.1	EDB7537186.1	fimbrial protein BcfA
AEF05955.1	HCG3558162.1	fimbrial protein BcfA
AEF05955.1	EDX4954351.1	fimbrial protein BcfA
AEF05955.1	EHK4821162.1	fimbrial protein BcfA
AEF05955.1	EAW4415244.1	fimbrial protein BcfA
AEF05955.1	ECA4216006.1	fimbrial protein BcfA
AEF05955.1	EFQ9487425.1	fimbrial protein BcfA
AEF05955.1	ECP7649869.1	fimbrial protein BcfA
AEF05955.1	HCJ3587439.1	fimbrial protein BcfA
AEF05955.1	WP_094204690.1	fimbrial protein BcfA
AEF05955.1	EAU7026558.1	fimbrial protein BcfA
AEF05955.1	CHD70397.1	type-1 fimbrial major subunit
AEF05955.1	EBM0611267.1	fimbrial protein
AEF05955.1	EGG0696326.1	fimbrial protein BcfA
AEF05955.1	HBQ3764149.1	fimbrial protein BcfA
AEF05955.1	EAW1750252.1	fimbrial protein
AEF05955.1	EDR6133763.1	fimbrial protein BcfA
AEF05955.1	EAO2751868.1	fimbrial protein BcfA
AEF05955.1	HAK6814348.1	fimbrial protein BcfA
AEF05955.1	EIA3582189.1	fimbrial protein BcfA
AEF05955.1	EEP4711248.1	fimbrial protein BcfA
AEF05955.1	EAT2713206.1	fimbrial protein BcfA
AEF05955.1	EBL2122308.1	fimbrial protein BcfA
AEF05955.1	ECK6621192.1	fimbrial protein BcfA
AEF05955.1	EBY7212762.1	fimbrial protein BcfA
AEF05955.1	EGD6745591.1	fimbrial protein BcfA
AEF05955.1	EAP7801704.1	fimbrial protein BcfA
AEF05955.1	EBO1165660.1	fimbrial protein BcfA
AEF05955.1	EGO7150163.1	fimbrial protein BcfA
AEF05955.1	EBX5474134.1	fimbrial protein
AEF05955.1	WP_057393561.1	fimbrial protein BcfA
AEF05955.1	HAK0845446.1	fimbrial protein BcfA
AEF05955.1	EAA2616387.1	fimbrial protein
AEF05955.1	MJU52977.1	fimbrial protein
AEF05955.1	EBU5508291.1	fimbrial protein BcfA
AEF05955.1	EDV8625819.1	fimbrial protein BcfA
AEF05955.1	EBL2697458.1	fimbrial protein BcfA
AEF05955.1	WP_116583514.1	fimbrial protein BcfA
AEF05955.1	EBJ6931479.1	fimbrial protein
AEF05955.1	EEM1611616.1	fimbrial protein BcfA
AEF05955.1	EAM8381649.1	fimbrial protein BcfA
AEF05955.1	WP_098070417.1	fimbrial protein BcfA
AEF05955.1	EEE7824549.1	fimbrial protein BcfA
AEF05955.1	HAU3266856.1	fimbrial protein BcfA
AEF05955.1	EAB9803642.1	fimbrial protein BcfA
AEF05955.1	WP_023226885.1	MULTISPECIES: fimbrial protein BcfA
AEF05955.1	EIG0032147.1	fimbrial protein BcfA
AEF05955.1	ECA9144126.1	fimbrial protein BcfA
AEF05955.1	EBF0840848.1	fimbrial protein BcfA
AEF05955.1	EHV2047191.1	fimbrial protein BcfA
AEF05955.1	EEN0880137.1	fimbrial protein BcfA
AEF05955.1	EAU0454217.1	fimbrial protein BcfA
AEF05955.1	EHU4689175.1	fimbrial protein BcfA
AEF05955.1	EAO7507279.1	fimbrial protein BcfA
AEF05955.1	WP_000743354.1	fimbrial protein BcfA
AEF05955.1	EJQ9683441.1	fimbrial protein BcfA
AEF05955.1	EIK1172501.1	fimbrial protein BcfA
AEF05955.1	EJU5716646.1	fimbrial protein BcfA
AEF05955.1	EDI0748425.1	fimbrial protein
AEF05955.1	EIX3874677.1	fimbrial protein BcfA
AEF05955.1	EAO2431412.1	fimbrial protein BcfA
AEF05955.1	EBK1207052.1	fimbrial protein BcfA
AEF05955.1	EGE32727.1	fimbrial subunit
AEF05955.1	EAM1625591.1	fimbrial protein BcfA
AEF05955.1	ECS4568524.1	fimbrial protein BcfA
AEF05955.1	EDE2084533.1	fimbrial protein BcfA
AEF05955.1	EIJ8583803.1	fimbrial protein BcfA
AEF05955.1	EFS5111928.1	fimbrial protein BcfA
AEF05955.1	EIP4146764.1	fimbrial protein BcfA
AEF05955.1	EIR6863832.1	fimbrial protein BcfA
AEF05955.1	EAU1642112.1	fimbrial protein BcfA
AEF05955.1	EBT4020629.1	fimbrial protein BcfA
AEF05955.1	EJO4636380.1	fimbrial protein BcfA
AEF05955.1	EEJ3824689.1	fimbrial protein BcfA
AEF05955.1	EFS5209252.1	fimbrial protein BcfA
AEF05955.1	ECP5950559.1	fimbrial protein BcfA
AEF05955.1	EID7886577.1	fimbrial protein BcfA
AEF05955.1	EBG8527110.1	fimbrial protein BcfA
AEF05955.1	WP_119503855.1	fimbrial protein BcfA
AEF05955.1	EIM8879917.1	fimbrial protein BcfA
AEF05955.1	EAM4966181.1	fimbrial protein BcfA
AEF05955.1	EHB6984233.1	fimbrial protein BcfA
AEF05955.1	EAA8474742.1	fimbrial protein BcfA
AEF05955.1	WP_109255129.1	fimbrial protein BcfA
AEF05955.1	EJP6415444.1	fimbrial protein BcfA
AEF05955.1	ECJ9633688.1	fimbrial protein BcfA
AEF05955.1	EDQ1375449.1	fimbrial protein BcfA
AEF05955.1	MCQ3175635.1	fimbrial protein BcfA
AEF05955.1	HAS8666179.1	fimbrial protein BcfA
AEF05955.1	WP_000743352.1	fimbrial protein BcfA
AEF05955.1	EDU6198528.1	fimbrial protein BcfA
AEF05955.1	EJM3642442.1	fimbrial protein BcfA
AEF05955.1	QPN37464.1	fimbrial protein BcfA
AEF05955.1	EGH9943775.1	fimbrial protein BcfA
AEF05955.1	EBK4002033.1	fimbrial protein
AEF05955.1	WP_138846808.1	fimbrial protein BcfA
AEF05955.1	ECZ4141574.1	fimbrial protein BcfA
AEF05955.1	EBB1780474.1	fimbrial protein BcfA
AEF05955.1	EDF5119616.1	fimbrial protein BcfA
AEF05956.1	ACN44219.1	fimbrial chaparone
AEF05956.1	WP_000742551.1	MULTISPECIES: fimbrial biogenesis chaperone BcfB
AEF05956.1	EHC76252.1	Fimbrial periplasmic chaperone SfmC, partial
AEF05956.1	EHC95390.1	fimbrial chaparone, partial
AEF05956.1	EHC83815.1	Fimbrial periplasmic chaperone SfmC
AEF05956.1	SUF74706.1	fimbrial chaperone
AEF05956.1	AAX63927.1	fimbrial chaparone
AEF05956.1	EHC55395.1	Fimbrial periplasmic chaperone SfmC
AEF05956.1	CPR49642.1	fimbrial chaperone
AEF05956.1	WP_001628066.1	fimbrial biogenesis chaperone BcfB
AEF05956.1	EAW1750253.1	fimbrial chaperone protein
AEF05956.1	WP_017441780.1	fimbrial biogenesis chaperone BcfB
AEF05956.1	ECF3721473.1	fimbrial chaperone protein
AEF05956.1	EDT0918456.1	fimbrial biogenesis chaperone BcfB
AEF05956.1	ECF1701793.1	fimbrial chaperone protein
AEF05956.1	EBI9003141.1	fimbrial chaperone protein
AEF05956.1	EBN5663679.1	fimbrial chaperone protein
AEF05956.1	EBO3871427.1	fimbrial chaperone protein
AEF05956.1	EHG6569230.1	fimbrial biogenesis chaperone BcfB
AEF05956.1	EBO1424912.1	fimbrial chaperone protein
AEF05956.1	EAM7962994.1	fimbrial chaperone protein
AEF05956.1	EBD9850632.1	fimbrial chaperone protein
AEF05956.1	EHI1799452.1	fimbrial biogenesis chaperone BcfB
AEF05956.1	WP_110398576.1	fimbrial biogenesis chaperone BcfB
AEF05956.1	EHW3556186.1	fimbrial biogenesis chaperone BcfB
AEF05956.1	EBW4436082.1	fimbrial chaperone protein
AEF05956.1	EBB5910157.1	fimbrial chaperone protein
AEF05956.1	EBX7704769.1	fimbrial chaperone protein
AEF05956.1	EHR3238248.1	fimbrial biogenesis chaperone BcfB
AEF05956.1	EFS8935366.1	fimbrial biogenesis chaperone BcfB
AEF05956.1	WP_048591757.1	MULTISPECIES: fimbrial biogenesis chaperone BcfB
AEF05956.1	EAA7724250.1	fimbrial chaperone protein
AEF05956.1	WP_063916991.1	fimbrial biogenesis chaperone BcfB
AEF05956.1	EBK1957483.1	fimbria/pilus periplasmic chaperone
AEF05956.1	WP_260806683.1	fimbrial biogenesis chaperone BcfB
AEF05956.1	EEK5463601.1	fimbrial biogenesis chaperone BcfB
AEF05956.1	EAU2362722.1	fimbrial chaperone protein
AEF05956.1	EBK7055641.1	fimbrial chaperone protein
AEF05956.1	ABX65473.1	hypothetical protein SPAB_00029
AEF05956.1	EAA9547390.1	fimbrial chaperone protein
AEF05956.1	WP_129397088.1	fimbrial biogenesis chaperone BcfB
AEF05956.1	EBO6893314.1	fimbrial chaperone protein
AEF05956.1	EHO1506415.1	fimbrial biogenesis chaperone BcfB
AEF05956.1	WP_097358631.1	fimbrial biogenesis chaperone BcfB
AEF05956.1	WP_024797411.1	fimbrial biogenesis chaperone BcfB
AEF05956.1	EHV1516365.1	fimbrial biogenesis chaperone BcfB
AEF05956.1	HAG1964138.1	fimbrial biogenesis chaperone BcfB
AEF05956.1	EHU0556617.1	fimbrial biogenesis chaperone BcfB
AEF05956.1	EHJ0376881.1	fimbrial biogenesis chaperone BcfB
AEF05956.1	EBU8713204.1	fimbrial chaperone protein
AEF05956.1	EGV6176332.1	fimbrial chaperone protein
AEF05956.1	WP_183062463.1	fimbrial biogenesis chaperone BcfB
AEF05956.1	EGB5987102.1	fimbrial biogenesis chaperone BcfB
AEF05956.1	EAS1995843.1	fimbrial chaperone protein
AEF05956.1	WP_058712790.1	fimbrial biogenesis chaperone BcfB
AEF05956.1	EHM2531222.1	fimbrial biogenesis chaperone BcfB
AEF05956.1	WP_000742555.1	fimbrial biogenesis chaperone BcfB
AEF05956.1	EBL0251720.1	fimbrial chaperone protein
AEF05956.1	WP_079954736.1	fimbrial biogenesis chaperone BcfB
AEF05956.1	EBS2256144.1	fimbrial chaperone protein
AEF05956.1	MIX28083.1	fimbrial chaperone protein
AEF05956.1	EGP9074195.1	fimbrial biogenesis chaperone BcfB
AEF05956.1	EEP9418912.1	fimbrial biogenesis chaperone BcfB
AEF05956.1	EJP8814165.1	fimbrial biogenesis chaperone BcfB
AEF05956.1	EAA7586443.1	fimbrial chaperone protein
AEF05956.1	EDC4529264.1	fimbria/pilus periplasmic chaperone
AEF05956.1	AJQ72608.1	Chaperone protein FimC
AEF05956.1	EEF3438097.1	fimbria/pilus periplasmic chaperone
AEF05956.1	WP_063815336.1	fimbrial biogenesis chaperone BcfB
AEF05956.1	ECZ5377944.1	fimbria/pilus periplasmic chaperone
AEF05956.1	EGJ2589660.1	fimbrial biogenesis chaperone BcfB
AEF05956.1	EAO8404703.1	fimbrial chaperone protein
AEF05956.1	WP_000739906.1	MULTISPECIES: fimbrial biogenesis chaperone BcfB
AEF05956.1	EDQ7750221.1	fimbrial biogenesis chaperone BcfB
AEF05956.1	EBH1305222.1	fimbrial chaperone protein
AEF05956.1	ECP2392564.1	fimbria/pilus periplasmic chaperone
AEF05956.1	EBG2035947.1	fimbrial chaperone protein
AEF05956.1	WP_001524192.1	fimbrial biogenesis chaperone BcfB
AEF05956.1	ECM2274985.1	fimbria/pilus periplasmic chaperone
AEF05956.1	EAZ4945683.1	fimbrial chaperone protein
AEF05956.1	EBV0498484.1	fimbrial chaperone protein
AEF05956.1	WP_000742553.1	fimbrial biogenesis chaperone BcfB
AEF05956.1	EAM9372047.1	fimbrial chaperone protein
AEF05956.1	EIF8605025.1	fimbrial biogenesis chaperone BcfB
AEF05956.1	EDZ9867953.1	fimbria/pilus periplasmic chaperone
AEF05956.1	EBQ8909962.1	fimbrial chaperone protein
AEF05956.1	WP_183052882.1	fimbrial biogenesis chaperone BcfB
AEF05956.1	EEB0463150.1	fimbria/pilus periplasmic chaperone
AEF05956.1	EAQ6133788.1	fimbrial chaperone protein
AEF05956.1	MMF32796.1	fimbrial chaperone protein
AEF05956.1	WP_144353866.1	fimbrial biogenesis chaperone BcfB
AEF05956.1	EAW1684131.1	fimbrial chaperone protein
AEF05956.1	WP_000742558.1	MULTISPECIES: fimbrial biogenesis chaperone BcfB
AEF05956.1	EJG3041158.1	fimbrial biogenesis chaperone BcfB
AEF05956.1	EAA7487281.1	fimbrial chaperone protein
AEF05956.1	EAO2431413.1	fimbrial chaperone protein
AEF05956.1	EDV0415496.1	fimbrial biogenesis chaperone BcfB
AEF05956.1	ECA9144125.1	fimbrial chaperone protein
AEF05956.1	EIV4953210.1	fimbrial biogenesis chaperone BcfB
AEF05956.1	WP_260808801.1	fimbrial biogenesis chaperone BcfB
AEF05956.1	EBI4181049.1	fimbrial chaperone protein
AEF05956.1	EFT3391068.1	fimbrial biogenesis chaperone BcfB
AEF05956.1	EDW0086125.1	fimbrial biogenesis chaperone BcfB
AEF05956.1	EBZ1659524.1	fimbrial chaperone protein
AEF05956.1	EAA4267203.1	fimbrial chaperone protein
AEF05956.1	WP_053445558.1	fimbrial biogenesis chaperone BcfB
AEF05956.1	EAA6624434.1	fimbrial chaperone protein
AEF05956.1	EGV0753296.1	fimbrial biogenesis chaperone BcfB
AEF05956.1	EJL3598466.1	fimbrial biogenesis chaperone BcfB
AEF05956.1	EBD5667773.1	fimbrial chaperone protein
AEF05956.1	EAV9421327.1	fimbrial chaperone protein
AEF05956.1	EBU8963900.1	fimbrial chaperone protein
AEF05956.1	WP_103132883.1	fimbrial biogenesis chaperone BcfB
AEF05956.1	EEA1994885.1	fimbria/pilus periplasmic chaperone
AEF05956.1	EAS8795382.1	fimbrial chaperone protein
AEF05956.1	EGP1433639.1	fimbrial biogenesis chaperone BcfB
AEF05956.1	EBL0042800.1	fimbrial chaperone protein
AEF05956.1	EAO2395423.1	fimbrial chaperone protein
AEF05956.1	EHX2738120.1	fimbrial biogenesis chaperone BcfB
AEF05956.1	WP_241593907.1	fimbrial biogenesis chaperone BcfB
AEF05956.1	EAC0862580.1	fimbrial chaperone protein
AEF05956.1	EBM4322975.1	fimbrial chaperone protein
AEF05956.1	EAS8380829.1	fimbrial chaperone protein
AEF05956.1	WP_262946663.1	fimbrial biogenesis chaperone BcfB
AEF05956.1	EDH1621220.1	fimbria/pilus periplasmic chaperone
AEF05956.1	EGH8791755.1	fimbrial biogenesis chaperone BcfB
AEF05956.1	EAQ6033278.1	fimbrial chaperone protein
AEF05956.1	EAR0012317.1	fimbrial chaperone protein
AEF05956.1	EBF4677661.1	fimbrial chaperone protein
AEF05956.1	EHN3776601.1	fimbrial biogenesis chaperone BcfB
AEF05956.1	EAB8341544.1	fimbrial chaperone protein
AEF05956.1	EEC2427417.1	fimbria/pilus periplasmic chaperone
AEF05956.1	EAQ1313192.1	fimbrial chaperone protein
AEF05956.1	EDC6393656.1	fimbria/pilus periplasmic chaperone
AEF05956.1	EAQ4840990.1	fimbrial chaperone protein
AEF05956.1	HCI4076624.1	fimbrial biogenesis chaperone BcfB
AEF05956.1	MBH0535646.1	fimbrial biogenesis chaperone BcfB
AEF05956.1	MBH0738903.1	fimbrial biogenesis chaperone BcfB
AEF05956.1	WP_203435067.1	fimbrial biogenesis chaperone BcfB
AEF05956.1	EBN6002597.1	fimbrial chaperone protein
AEF05956.1	ECZ6520975.1	fimbria/pilus periplasmic chaperone
AEF05956.1	EBF4832408.1	fimbrial chaperone protein
AEF05956.1	HCH9121805.1	fimbrial biogenesis chaperone BcfB
AEF05956.1	EDT7433261.1	fimbrial biogenesis chaperone BcfB
AEF05956.1	EAY2300765.1	fimbrial chaperone protein
AEF05956.1	EAC0925858.1	fimbrial chaperone protein
AEF05956.1	EJW0967044.1	fimbrial biogenesis chaperone BcfB
AEF05956.1	WP_022742592.1	fimbrial biogenesis chaperone BcfB
AEF05956.1	EAM1900535.1	fimbrial chaperone protein
AEF05956.1	WP_061383321.1	fimbrial biogenesis chaperone BcfB
AEF05956.1	ECH1592676.1	fimbria/pilus periplasmic chaperone
AEF05956.1	EGF4287163.1	fimbrial biogenesis chaperone BcfB
AEF05956.1	WP_058116229.1	fimbrial biogenesis chaperone BcfB
AEF05956.1	EBS9005315.1	fimbria/pilus periplasmic chaperone
AEF05956.1	EBS5586754.1	fimbrial chaperone protein
AEF05956.1	WP_104856722.1	fimbrial biogenesis chaperone BcfB
AEF05956.1	ECW7101347.1	fimbria/pilus periplasmic chaperone
AEF05956.1	EAB2613134.1	fimbrial chaperone protein
AEF05956.1	EBC3718054.1	fimbrial chaperone protein
AEF05956.1	ECW1809309.1	fimbria/pilus periplasmic chaperone
AEF05956.1	ECX3692176.1	fimbria/pilus periplasmic chaperone
AEF05956.1	EAM9789800.1	fimbrial chaperone protein
AEF05956.1	EFT4017127.1	fimbrial biogenesis chaperone BcfB
AEF05956.1	EBI9722388.1	fimbrial chaperone protein
AEF05956.1	WP_000742554.1	fimbrial biogenesis chaperone BcfB
AEF05956.1	WP_114052969.1	fimbrial biogenesis chaperone BcfB
AEF05956.1	EBW7490649.1	fimbrial chaperone protein
AEF05956.1	EDJ7617190.1	fimbrial chaperone protein
AEF05956.1	EAX5272451.1	fimbrial chaperone protein
AEF05956.1	WP_094913566.1	fimbrial biogenesis chaperone BcfB
AEF05956.1	EAO4363128.1	fimbrial chaperone protein
AEF05956.1	ADX15769.1	fimbrial chaparone
AEF05956.1	EIC8525813.1	fimbrial biogenesis chaperone BcfB
AEF05956.1	MLP07337.1	fimbrial chaperone protein
AEF05956.1	EAO6498184.1	fimbrial chaperone protein
AEF05956.1	EAP8642295.1	fimbrial chaperone protein
AEF05956.1	EAA7134292.1	fimbrial chaperone protein
AEF05956.1	EAN0191669.1	fimbrial chaperone protein
AEF05956.1	EJF6704172.1	fimbrial biogenesis chaperone BcfB
AEF05956.1	EAP8714266.1	fimbrial chaperone protein
AEF05956.1	EBK2140290.1	fimbria/pilus periplasmic chaperone
AEF05956.1	EAZ8232727.1	fimbrial chaperone protein
AEF05956.1	EBO2416751.1	fimbria/pilus periplasmic chaperone
AEF05956.1	EEK2642937.1	fimbrial biogenesis chaperone BcfB
AEF05956.1	WP_103133561.1	MULTISPECIES: fimbrial biogenesis chaperone BcfB
AEF05956.1	ECB6803845.1	fimbrial chaperone protein
AEF05956.1	EBV5007938.1	fimbrial chaperone protein
AEF05956.1	EJJ6084392.1	fimbrial biogenesis chaperone BcfB
AEF05956.1	EBZ0424196.1	fimbrial chaperone protein
AEF05956.1	EDV7199198.1	fimbrial biogenesis chaperone BcfB
AEF05956.1	EIQ3573066.1	fimbrial biogenesis chaperone BcfB
AEF05956.1	EAA8148315.1	fimbrial chaperone protein
AEF05956.1	ECK0278639.1	fimbria/pilus periplasmic chaperone
AEF05956.1	EAQ9893003.1	fimbrial chaperone protein
AEF05956.1	EBV1831548.1	fimbrial chaperone protein
AEF05956.1	WP_080205614.1	fimbrial biogenesis chaperone BcfB
AEF05956.1	EBC4291576.1	fimbrial chaperone protein
AEF05956.1	EBH1741868.1	fimbrial chaperone protein
AEF05956.1	EBK2004402.1	fimbria/pilus periplasmic chaperone
AEF05956.1	HAK8221354.1	fimbrial biogenesis chaperone BcfB
AEF05956.1	ECO4547284.1	fimbria/pilus periplasmic chaperone
AEF05956.1	ECH2929623.1	fimbria/pilus periplasmic chaperone
AEF05956.1	EAO2687358.1	fimbrial chaperone protein
AEF05956.1	EBJ0774913.1	fimbrial chaperone protein
AEF05956.1	EJH1119908.1	fimbrial biogenesis chaperone BcfB
AEF05956.1	EBI9731167.1	fimbrial chaperone protein
AEF05956.1	EDQ9143273.1	fimbrial biogenesis chaperone BcfB
AEF05956.1	EEA4344795.1	fimbrial biogenesis chaperone BcfB
AEF05956.1	WP_023137526.1	MULTISPECIES: fimbrial biogenesis chaperone BcfB
AEF05956.1	EDA5988750.1	fimbria/pilus periplasmic chaperone
AEF05956.1	WP_144311632.1	fimbrial biogenesis chaperone BcfB
AEF05956.1	WP_109182787.1	fimbrial biogenesis chaperone BcfB
AEF05956.1	EAQ0038352.1	fimbrial chaperone protein
AEF05956.1	EDQ9891228.1	fimbrial biogenesis chaperone BcfB
AEF05956.1	EBY3263794.1	fimbrial chaperone protein
AEF05956.1	HAF5852053.1	fimbrial biogenesis chaperone BcfB
AEF05956.1	EJF0224532.1	fimbrial biogenesis chaperone BcfB
AEF05956.1	EJN8751866.1	fimbrial biogenesis chaperone BcfB
AEF05956.1	EAR5786872.1	fimbrial chaperone protein
AEF05956.1	ECQ7903416.1	fimbria/pilus periplasmic chaperone
AEF05956.1	EIX6433125.1	fimbrial biogenesis chaperone BcfB
AEF05956.1	ECW3429071.1	fimbria/pilus periplasmic chaperone
AEF05956.1	EBR5832742.1	fimbria/pilus periplasmic chaperone
AEF05956.1	EAM3781045.1	fimbrial chaperone protein
AEF05956.1	ECC7383279.1	fimbria/pilus periplasmic chaperone
AEF05956.1	EBL3445189.1	fimbria/pilus periplasmic chaperone
AEF05956.1	EEP1515713.1	fimbrial biogenesis chaperone BcfB
AEF05956.1	EGM6269611.1	fimbrial biogenesis chaperone BcfB
AEF05956.1	EDU7372414.1	fimbrial biogenesis chaperone BcfB
AEF05956.1	EEG8223524.1	fimbrial biogenesis chaperone BcfB
AEF05956.1	WP_154023187.1	fimbrial biogenesis chaperone BcfB
AEF05956.1	EAO9753836.1	fimbrial chaperone protein
AEF05956.1	EAA8707795.1	fimbrial chaperone protein
AEF05956.1	EDQ1288244.1	fimbrial biogenesis chaperone BcfB
AEF05956.1	EIT4376874.1	fimbrial biogenesis chaperone BcfB
AEF05956.1	EJE9655053.1	fimbrial biogenesis chaperone BcfB
AEF05956.1	EED7210871.1	fimbrial biogenesis chaperone BcfB
AEF05956.1	ECJ0818245.1	fimbria/pilus periplasmic chaperone
AEF05956.1	WP_039514719.1	fimbrial biogenesis chaperone BcfB
AEF05956.1	EHC42036.1	fimbrial chaparone, partial
AEF05956.1	EAA5479767.1	fimbrial chaperone protein
AEF05956.1	EBL4515951.1	fimbria/pilus periplasmic chaperone
AEF05956.1	EBM2804176.1	fimbrial chaperone protein
AEF05956.1	EEM8406404.1	fimbria/pilus periplasmic chaperone
AEF05956.1	EJJ7589582.1	fimbrial biogenesis chaperone BcfB
AEF05956.1	EHC42394.1	Fimbrial periplasmic chaperone SfmC
AEF05956.1	MBM9249830.1	fimbrial biogenesis chaperone BcfB
AEF05956.1	EAA6050339.1	fimbrial chaperone protein
AEF05956.1	ACF66273.1	chaperone protein FimC
AEF05956.1	WP_187059441.1	fimbrial biogenesis chaperone BcfB
AEF05956.1	EBH1501226.1	fimbrial chaperone protein
AEF05956.1	EBB2937857.1	fimbrial chaperone protein
AEF05956.1	EAB2879828.1	fimbrial chaperone protein
AEF05956.1	EBZ4429281.1	fimbrial chaperone protein
AEF05956.1	EAQ0347759.1	fimbrial chaperone protein
AEF05956.1	WP_058110443.1	fimbrial biogenesis chaperone BcfB
AEF05956.1	EAV1548999.1	fimbrial chaperone protein
AEF05956.1	EIS5670654.1	fimbrial biogenesis chaperone BcfB
AEF05956.1	EBC6965149.1	fimbrial chaperone protein
AEF05956.1	EAA5779083.1	fimbrial chaperone protein
AEF05956.1	WP_023212754.1	fimbrial biogenesis chaperone BcfB
AEF05956.1	EAN3607091.1	fimbrial chaperone protein
AEF05956.1	ECI7780546.1	fimbrial chaperone protein
AEF05956.1	ECC9937911.1	fimbrial chaperone protein
AEF05956.1	EDK9934180.1	fimbrial chaperone protein
AEF05956.1	EAO9561491.1	fimbrial chaperone protein
AEF05956.1	EAB7163945.1	fimbrial chaperone protein
AEF05956.1	WP_130548902.1	fimbrial biogenesis chaperone BcfB
AEF05956.1	ECX9337842.1	fimbria/pilus periplasmic chaperone
AEF05956.1	EBV0206798.1	fimbrial chaperone protein
AEF05956.1	EAB9247718.1	fimbrial chaperone protein
AEF05956.1	ACH74189.1	chaperone protein FimC
AEF05956.1	ECJ9879952.1	fimbria/pilus periplasmic chaperone
AEF05956.1	EAY2847746.1	fimbrial chaperone protein
AEF05956.1	EED7482102.1	fimbrial biogenesis chaperone BcfB
AEF05956.1	ECY3861128.1	fimbria/pilus periplasmic chaperone
AEF05956.1	EGW8084407.1	fimbrial biogenesis chaperone BcfB
AEF05956.1	WP_109909557.1	fimbrial biogenesis chaperone BcfB
AEF05956.1	EIF6784814.1	fimbrial biogenesis chaperone BcfB
AEF05956.1	EBC4126498.1	fimbrial chaperone protein
AEF05956.1	EEC0303413.1	fimbrial biogenesis chaperone BcfB
AEF05956.1	EGD1404624.1	fimbrial biogenesis chaperone BcfB
AEF05956.1	EEN0393310.1	fimbria/pilus periplasmic chaperone
AEF05956.1	EHT1012101.1	fimbrial biogenesis chaperone BcfB
AEF05956.1	EIC6718455.1	fimbrial biogenesis chaperone BcfB
AEF05956.1	EDG4307784.1	fimbria/pilus periplasmic chaperone
AEF05956.1	EDW1451457.1	fimbrial biogenesis chaperone BcfB
AEF05956.1	OIN14766.1	fimbrial chaperone protein
AEF05956.1	EBO4816355.1	fimbrial chaperone protein
AEF05956.1	EIS1589171.1	fimbrial biogenesis chaperone BcfB
AEF05956.1	ECM4649186.1	fimbria/pilus periplasmic chaperone
AEF05956.1	EHM6167747.1	fimbrial biogenesis chaperone BcfB
AEF05956.1	EIQ6082723.1	fimbrial biogenesis chaperone BcfB
AEF05956.1	WP_146713279.1	fimbrial biogenesis chaperone BcfB
AEF05956.1	EBC1138761.1	fimbrial chaperone protein
AEF05956.1	EBS1118591.1	fimbrial chaperone protein
AEF05956.1	WP_127173057.1	fimbrial biogenesis chaperone BcfB
AEF05956.1	EFQ5766605.1	fimbrial biogenesis chaperone BcfB
AEF05956.1	EIO3487312.1	fimbrial biogenesis chaperone BcfB
AEF05956.1	EDS7903915.1	fimbrial biogenesis chaperone BcfB
AEF05956.1	EDJ2344764.1	fimbrial chaperone protein
AEF05956.1	EAY7356788.1	fimbrial chaperone protein
AEF05956.1	EBT1024736.1	fimbria/pilus periplasmic chaperone
AEF05956.1	EBJ5496167.1	fimbrial chaperone protein
AEF05956.1	EBL6972186.1	fimbrial chaperone protein
AEF05956.1	EJJ3997464.1	fimbrial biogenesis chaperone BcfB
AEF05956.1	AXD78426.1	fimbrial chaperone protein
AEF05956.1	EGN1277512.1	fimbrial biogenesis chaperone BcfB
AEF05956.1	EED2504209.1	fimbrial biogenesis chaperone BcfB
AEF05956.1	EHS1317924.1	fimbrial biogenesis chaperone BcfB
AEF05956.1	EEX0004107.1	fimbrial biogenesis chaperone BcfB
AEF05956.1	EHB3537521.1	fimbrial biogenesis chaperone BcfB
AEF05956.1	EJT0716298.1	fimbrial biogenesis chaperone BcfB
AEF05956.1	ECZ3969581.1	fimbria/pilus periplasmic chaperone
AEF05956.1	ECT4848921.1	fimbrial chaperone protein
AEF05956.1	EAA6407459.1	fimbrial chaperone protein
AEF05956.1	EBZ6540441.1	fimbrial chaperone protein
AEF05956.1	WP_000742552.1	fimbrial biogenesis chaperone BcfB
AEF05956.1	ECY0477692.1	fimbria/pilus periplasmic chaperone
AEF05956.1	EEP5362040.1	fimbrial biogenesis chaperone BcfB
AEF05956.1	WP_023254454.1	fimbrial biogenesis chaperone BcfB
AEF05956.1	TGD54820.1	fimbrial chaperone protein
AEF05956.1	ECH9258135.1	fimbrial chaperone protein
AEF05956.1	WP_000742557.1	fimbrial biogenesis chaperone BcfB
AEF05956.1	ECE1996547.1	fimbria/pilus periplasmic chaperone
AEF05956.1	EIZ8584450.1	fimbrial biogenesis chaperone BcfB
AEF05956.1	EAA5206928.1	fimbrial chaperone protein
AEF05956.1	EEP8195525.1	fimbrial biogenesis chaperone BcfB
AEF05956.1	EBV3408284.1	fimbrial chaperone protein
AEF05956.1	EEO3503356.1	fimbrial biogenesis chaperone BcfB
AEF05956.1	WP_224148963.1	fimbrial biogenesis chaperone BcfB
AEF05956.1	EIO2083407.1	fimbrial biogenesis chaperone BcfB
AEF05956.1	EBN0145846.1	fimbria/pilus periplasmic chaperone
AEF05956.1	EJF2637766.1	fimbrial biogenesis chaperone BcfB
AEF05956.1	EHT8451271.1	fimbrial biogenesis chaperone BcfB
AEF05956.1	EDA8533588.1	fimbria/pilus periplasmic chaperone
AEF05956.1	EEG6902287.1	fimbrial biogenesis chaperone BcfB
AEF05956.1	EBW8000841.1	fimbrial chaperone protein
AEF05956.1	HAF1675915.1	fimbrial biogenesis chaperone BcfB
AEF05956.1	EAQ3463719.1	fimbrial chaperone protein
AEF05956.1	EBY1850840.1	fimbrial chaperone protein
AEF05956.1	HCK5364020.1	fimbrial biogenesis chaperone BcfB
AEF05956.1	ECQ7819691.1	fimbria/pilus periplasmic chaperone
AEF05956.1	WP_098070419.1	fimbrial biogenesis chaperone BcfB
AEF05956.1	EDV8184413.1	fimbrial biogenesis chaperone BcfB
AEF05956.1	ECT3843218.1	fimbrial chaperone protein
AEF05956.1	EEC2583979.1	fimbria/pilus periplasmic chaperone
AEF05956.1	KSA89389.1	hypothetical protein LFZ90_16010
AEF05956.1	EDN4068397.1	fimbria/pilus periplasmic chaperone
AEF05956.1	EIJ2841151.1	fimbrial biogenesis chaperone BcfB
AEF05956.1	EDT6681806.1	fimbrial biogenesis chaperone BcfB
AEF05956.1	EBD6240711.1	fimbrial chaperone protein
AEF05956.1	ECY1724047.1	fimbria/pilus periplasmic chaperone
AEF05956.1	ECY9607199.1	fimbria/pilus periplasmic chaperone
AEF05956.1	EBA6532570.1	fimbrial chaperone protein
AEF05956.1	WP_001748844.1	fimbrial biogenesis chaperone BcfB
AEF05956.1	HBZ6150746.1	fimbrial biogenesis chaperone BcfB
AEF05956.1	WP_023164922.1	fimbrial biogenesis chaperone BcfB
AEF05956.1	HCL0680002.1	fimbrial biogenesis chaperone BcfB
AEF05956.1	EBH1098516.1	fimbrial chaperone protein
AEF05956.1	EAM2864787.1	fimbrial chaperone protein
AEF05956.1	EAA0889823.1	fimbrial chaperone protein
AEF05956.1	EJE2132686.1	fimbrial biogenesis chaperone BcfB
AEF05956.1	ECX7953674.1	fimbrial chaperone protein
AEF05956.1	EHI7573921.1	fimbrial biogenesis chaperone BcfB
AEF05956.1	EBQ3337784.1	fimbria/pilus periplasmic chaperone
AEF05956.1	EHX0853950.1	fimbrial biogenesis chaperone BcfB
AEF05956.1	EAM4966180.1	fimbrial chaperone protein
AEF05956.1	EBY8743481.1	fimbrial chaperone protein
AEF05956.1	EAA9052085.1	fimbrial chaperone protein
AEF05956.1	ECY6149314.1	fimbria/pilus periplasmic chaperone
AEF05956.1	WP_183061324.1	fimbrial biogenesis chaperone BcfB
AEF05956.1	HBL9561320.1	fimbrial biogenesis chaperone BcfB
AEF05956.1	EBX7363246.1	fimbrial chaperone protein
AEF05956.1	WP_064043349.1	MULTISPECIES: fimbrial biogenesis chaperone BcfB
AEF05956.1	EEE1869987.1	fimbrial biogenesis chaperone BcfB
AEF05956.1	EBW1529820.1	fimbrial chaperone protein
AEF05956.1	EAB9081071.1	fimbrial chaperone protein
AEF05956.1	EBE0332959.1	fimbrial chaperone protein
AEF05956.1	EBB2769069.1	fimbrial chaperone protein
AEF05956.1	EBP9659952.1	fimbria/pilus periplasmic chaperone
AEF05956.1	EDQ1902598.1	fimbrial biogenesis chaperone BcfB
AEF05956.1	EAC0958415.1	fimbrial chaperone protein
AEF05956.1	EEO9717762.1	fimbrial biogenesis chaperone BcfB
AEF05956.1	WP_122070118.1	fimbrial biogenesis chaperone BcfB
AEF05956.1	EAW3110115.1	fimbrial chaperone protein
AEF05956.1	EAZ4480077.1	fimbrial chaperone protein
AEF05956.1	ECC5342933.1	fimbria/pilus periplasmic chaperone
AEF05956.1	WP_076725958.1	fimbrial biogenesis chaperone BcfB
AEF05956.1	EIC2800447.1	fimbrial biogenesis chaperone BcfB
AEF05956.1	WP_135400727.1	fimbrial biogenesis chaperone BcfB
AEF05956.1	EBE5747737.1	fimbrial chaperone protein
AEF05956.1	EAM4561780.1	fimbrial chaperone protein
AEF05956.1	HCC9121140.1	fimbrial biogenesis chaperone BcfB
AEF05956.1	ECW1232295.1	fimbria/pilus periplasmic chaperone
AEF05956.1	EGU6708176.1	fimbrial biogenesis chaperone BcfB
AEF05956.1	ECX7217664.1	fimbrial chaperone protein
AEF05956.1	WP_000739905.1	fimbrial biogenesis chaperone BcfB
AEF05956.1	EHP9369413.1	fimbrial biogenesis chaperone BcfB
AEF05956.1	EJP8746636.1	fimbrial biogenesis chaperone BcfB
AEF05956.1	EDV2951646.1	fimbrial biogenesis chaperone BcfB
AEF05956.1	EAO2751867.1	fimbrial chaperone protein
AEF05956.1	EIL9175031.1	fimbrial biogenesis chaperone BcfB
AEF05956.1	EBD5041757.1	fimbrial chaperone protein
AEF05956.1	HAF9756301.1	fimbrial biogenesis chaperone BcfB
AEF05956.1	EAM9833409.1	fimbrial chaperone protein
AEF05956.1	ECM2318503.1	fimbria/pilus periplasmic chaperone
AEF05956.1	EAQ5774204.1	fimbrial chaperone protein
AEF05956.1	EBG0674861.1	fimbrial chaperone protein
AEF05956.1	EBC4875806.1	fimbrial chaperone protein
AEF05956.1	EBG7538800.1	fimbrial chaperone protein
AEF05956.1	EHS4661385.1	fimbrial biogenesis chaperone BcfB
AEF05956.1	EHD0425367.1	fimbrial biogenesis chaperone BcfB
AEF05956.1	EIW4287338.1	fimbrial biogenesis chaperone BcfB
AEF05956.1	EDZ1227510.1	fimbrial biogenesis chaperone BcfB
AEF05956.1	EBA3490840.1	fimbrial chaperone protein
AEF05956.1	WP_048888933.1	fimbrial biogenesis chaperone BcfB
AEF05956.1	EGD4019156.1	fimbrial biogenesis chaperone BcfB
AEF05956.1	EDW3793697.1	fimbrial biogenesis chaperone BcfB
AEF05956.1	HCL4444023.1	fimbrial biogenesis chaperone BcfB
AEF05956.1	EBR8361008.1	fimbrial chaperone protein
AEF05956.1	WP_109277087.1	fimbrial biogenesis chaperone BcfB
AEF05956.1	EBC2118684.1	fimbrial chaperone protein
AEF05956.1	EJW5944498.1	fimbrial biogenesis chaperone BcfB
AEF05956.1	EGH3287559.1	fimbrial biogenesis chaperone BcfB
AEF05956.1	EHE5679222.1	fimbrial biogenesis chaperone BcfB
AEF05956.1	ECA6121779.1	fimbrial chaperone protein
AEF05956.1	EDZ3387046.1	fimbrial biogenesis chaperone BcfB
AEF05956.1	EAM1386384.1	fimbrial chaperone protein
AEF05956.1	ECH7306820.1	fimbria/pilus periplasmic chaperone
AEF05956.1	EBD0870175.1	fimbrial chaperone protein
AEF05956.1	ECK6801460.1	fimbria/pilus periplasmic chaperone
AEF05956.1	EDB4113680.1	fimbria/pilus periplasmic chaperone
AEF05956.1	ECI4491698.1	fimbrial chaperone protein
AEF05956.1	HAG3865494.1	fimbrial biogenesis chaperone BcfB
AEF05956.1	ECA7407502.1	fimbrial chaperone protein
AEF05956.1	WP_122029707.1	fimbrial biogenesis chaperone BcfB
AEF05956.1	ECA4739227.1	fimbrial chaperone protein
AEF05956.1	MKO98176.1	fimbrial chaperone protein
AEF05956.1	EBS5232826.1	fimbrial chaperone protein
AEF05956.1	ECX7968753.1	fimbria/pilus periplasmic chaperone
AEF05956.1	EBU2089296.1	fimbria/pilus periplasmic chaperone
AEF05956.1	EJH8054245.1	fimbrial biogenesis chaperone BcfB
AEF05956.1	EDS3105346.1	fimbrial biogenesis chaperone BcfB
AEF05956.1	EAA1830168.1	fimbrial chaperone protein
AEF05956.1	ECN6916402.1	fimbria/pilus periplasmic chaperone
AEF05956.1	EAA7132953.1	fimbrial chaperone protein
AEF05956.1	HBL9988204.1	fimbrial biogenesis chaperone BcfB
AEF05956.1	EHD7638211.1	fimbrial biogenesis chaperone BcfB
AEF05956.1	EED3578578.1	fimbria/pilus periplasmic chaperone
AEF05956.1	EEC3367664.1	fimbria/pilus periplasmic chaperone
AEF05956.1	EAR1333874.1	fimbrial chaperone protein
AEF05956.1	EBG4094518.1	fimbrial chaperone protein
AEF05956.1	ECV9219355.1	fimbria/pilus periplasmic chaperone
AEF05956.1	WP_076916602.1	fimbrial biogenesis chaperone BcfB
AEF05956.1	EAS3962072.1	fimbrial chaperone protein
AEF05956.1	HCI3114785.1	fimbrial biogenesis chaperone BcfB
AEF05956.1	EBX9478790.1	fimbrial chaperone protein
AEF05956.1	ECZ6310896.1	fimbria/pilus periplasmic chaperone
AEF05956.1	EFO7014816.1	fimbrial biogenesis chaperone BcfB
AEF05956.1	EAN1251497.1	fimbrial chaperone protein
AEF05956.1	EAP8542000.1	fimbrial chaperone protein
AEF05956.1	EEC4491906.1	fimbria/pilus periplasmic chaperone
AEF05956.1	ECA1327386.1	fimbrial chaperone protein
AEF05956.1	EJH0030198.1	fimbrial biogenesis chaperone BcfB
AEF05956.1	MJP98150.1	fimbrial chaperone protein
AEF05956.1	EIF2298688.1	fimbrial biogenesis chaperone BcfB
AEF05956.1	EBG1911342.1	fimbrial chaperone protein
AEF05956.1	WP_061440141.1	fimbrial biogenesis chaperone BcfB
AEF05956.1	ECB2441505.1	fimbrial chaperone protein
AEF05956.1	EHC77753.1	Fimbrial chaperone
AEF05956.1	WP_183059808.1	fimbrial biogenesis chaperone BcfB
AEF05956.1	EEI1162176.1	fimbrial biogenesis chaperone BcfB
AEF05956.1	EDV9706739.1	fimbrial biogenesis chaperone BcfB
AEF05956.1	WP_079839753.1	fimbrial biogenesis chaperone BcfB
AEF05956.1	WP_079942345.1	fimbrial biogenesis chaperone BcfB
AEF05956.1	EBP7621460.1	fimbria/pilus periplasmic chaperone
AEF05956.1	EIT5465877.1	fimbrial biogenesis chaperone BcfB
AEF05956.1	EBY0108465.1	fimbrial chaperone protein
AEF05956.1	EHR2723823.1	fimbrial biogenesis chaperone BcfB
AEF05956.1	WP_080245693.1	fimbrial biogenesis chaperone BcfB
AEF05956.1	EAA6340425.1	fimbrial chaperone protein
AEF05956.1	WP_116526162.1	fimbrial biogenesis chaperone BcfB
AEF05956.1	EAM8009526.1	fimbrial chaperone protein
AEF05956.1	EIY3807697.1	fimbrial biogenesis chaperone BcfB
AEF05956.1	EBQ0175492.1	fimbria/pilus periplasmic chaperone
AEF05956.1	ECW1155568.1	fimbria/pilus periplasmic chaperone
AEF05956.1	EIB3958998.1	fimbrial biogenesis chaperone BcfB
AEF05956.1	WP_000742560.1	MULTISPECIES: fimbrial biogenesis chaperone BcfB
AEF05956.1	EBT1531304.1	fimbria/pilus periplasmic chaperone
AEF05956.1	EJB4783265.1	fimbrial biogenesis chaperone BcfB
AEF05956.1	EAM8768270.1	fimbrial chaperone protein
AEF05956.1	WP_088731080.1	fimbrial biogenesis chaperone BcfB
AEF05956.1	WP_001527573.1	fimbrial biogenesis chaperone BcfB
AEF05956.1	EDW5791876.1	fimbrial biogenesis chaperone BcfB
AEF05956.1	EAO6923344.1	fimbrial chaperone protein
AEF05956.1	WP_000742559.1	MULTISPECIES: fimbrial biogenesis chaperone BcfB
AEF05956.1	EAR9411554.1	fimbrial chaperone protein
AEF05956.1	EIB9753336.1	fimbrial biogenesis chaperone BcfB
AEF05956.1	EFR3094115.1	fimbrial biogenesis chaperone BcfB
AEF05957.1	WP_001245854.1	MULTISPECIES: fimbrial usher BcfC
AEF05957.1	AFD57070.1	fimbrial usher protein
AEF05957.1	EAC1018451.1	fimbrial biogenesis outer membrane usher protein
AEF05957.1	EAW5775173.1	fimbrial biogenesis outer membrane usher protein
AEF05957.1	EBJ5873740.1	fimbrial biogenesis outer membrane usher protein
AEF05957.1	EIB3550952.1	fimbrial usher BcfC
AEF05957.1	EAY2183116.1	fimbrial biogenesis outer membrane usher protein
AEF05957.1	WP_079952940.1	fimbrial usher BcfC
AEF05957.1	MJV43936.1	fimbrial biogenesis outer membrane usher protein
AEF05957.1	EAT9638280.1	fimbrial biogenesis outer membrane usher protein
AEF05957.1	HAD7202453.1	fimbrial biogenesis outer membrane usher protein
AEF05957.1	EDR6783249.1	fimbrial biogenesis usher protein BcfC
AEF05957.1	EHI8725086.1	fimbrial biogenesis usher protein BcfC
AEF05957.1	WP_132501864.1	fimbrial usher BcfC
AEF05957.1	EDY7928680.1	fimbrial biogenesis usher protein BcfC
AEF05957.1	EAZ5872339.1	fimbrial biogenesis outer membrane usher protein
AEF05957.1	EAS9352353.1	fimbrial biogenesis outer membrane usher protein
AEF05957.1	EIU6547783.1	fimbrial usher BcfC
AEF05957.1	EGX2758003.1	fimbrial biogenesis usher protein BcfC
AEF05957.1	EGG8878056.1	fimbrial biogenesis usher protein BcfC
AEF05957.1	EJH9805551.1	fimbrial usher BcfC
AEF05957.1	EGT1205641.1	fimbrial biogenesis usher protein BcfC
AEF05957.1	EDR8994404.1	fimbrial biogenesis usher protein BcfC
AEF05957.1	EHL5904163.1	fimbrial usher BcfC
AEF05957.1	EEA6818407.1	fimbrial biogenesis usher protein BcfC
AEF05957.1	EGL5730145.1	fimbrial biogenesis usher protein BcfC
AEF05957.1	EGP0898919.1	fimbrial biogenesis usher protein BcfC
AEF05957.1	WP_109266968.1	fimbrial usher BcfC
AEF05957.1	EBO3172302.1	fimbrial biogenesis outer membrane usher protein
AEF05957.1	EDR3803861.1	fimbrial biogenesis usher protein BcfC
AEF05957.1	WP_106746839.1	fimbrial usher BcfC
AEF05957.1	EDN0783020.1	fimbrial biogenesis usher protein BcfC
AEF05957.1	EGF3351731.1	fimbrial biogenesis usher protein BcfC
AEF05957.1	EJU4976111.1	fimbrial usher BcfC
AEF05957.1	EFS9135970.1	fimbrial biogenesis usher protein BcfC
AEF05957.1	EAO6113740.1	fimbrial biogenesis outer membrane usher protein
AEF05957.1	EHO4677960.1	fimbrial usher BcfC
AEF05957.1	EDR9721969.1	fimbrial biogenesis usher protein BcfC
AEF05957.1	WP_130532483.1	fimbrial usher BcfC
AEF05957.1	EIZ5420059.1	fimbrial usher BcfC
AEF05957.1	WP_054173898.1	fimbrial usher BcfC
AEF05957.1	EBA7089111.1	fimbrial biogenesis outer membrane usher protein
AEF05957.1	EHT5961123.1	fimbrial usher BcfC
AEF05957.1	WP_061582270.1	fimbrial usher BcfC
AEF05957.1	EJO1241734.1	fimbrial usher BcfC
AEF05957.1	EHM7192549.1	fimbrial usher BcfC
AEF05957.1	EHO4701132.1	fimbrial usher BcfC
AEF05957.1	EGL3166087.1	fimbrial biogenesis usher protein BcfC
AEF05957.1	ECP5549095.1	fimbrial biogenesis outer membrane usher protein
AEF05957.1	EDI5423473.1	fimbrial biogenesis usher protein BcfC
AEF05957.1	ECJ8111588.1	fimbrial biogenesis outer membrane usher protein
AEF05957.1	EIJ9513694.1	fimbrial usher BcfC
AEF05957.1	ECW0639571.1	fimbrial biogenesis usher protein
AEF05957.1	EHI2696297.1	fimbrial biogenesis usher protein BcfC
AEF05957.1	HBJ7413273.1	fimbrial usher BcfC
AEF05957.1	EEI1532796.1	fimbrial biogenesis usher protein BcfC
AEF05957.1	EBA1164966.1	fimbrial biogenesis outer membrane usher protein
AEF05957.1	ECG5691610.1	fimbrial biogenesis outer membrane usher protein
AEF05957.1	WP_058647666.1	fimbrial usher BcfC
AEF05957.1	EHJ0376882.1	fimbrial biogenesis usher protein BcfC
AEF05957.1	EED7385383.1	fimbrial biogenesis outer membrane usher protein
AEF05957.1	EGX3485981.1	fimbrial biogenesis usher protein BcfC
AEF05957.1	EAR0616206.1	fimbrial biogenesis outer membrane usher protein
AEF05957.1	WP_097366633.1	fimbrial usher BcfC
AEF05957.1	EGI0815583.1	fimbrial biogenesis usher protein BcfC
AEF05957.1	ECZ6406412.1	fimbrial biogenesis usher protein
AEF05957.1	HAC9449237.1	fimbrial biogenesis outer membrane usher protein
AEF05957.1	WP_136954482.1	MULTISPECIES: fimbrial usher BcfC
AEF05957.1	MLH53130.1	fimbrial biogenesis outer membrane usher protein
AEF05957.1	EBR5055266.1	fimbrial biogenesis outer membrane usher protein
AEF05957.1	EAA7586442.1	fimbrial biogenesis outer membrane usher protein
AEF05957.1	EBA7384552.1	fimbrial biogenesis outer membrane usher protein
AEF05957.1	WP_061873618.1	fimbrial usher BcfC
AEF05957.1	EAY3007147.1	fimbrial biogenesis outer membrane usher protein
AEF05957.1	EDA2754688.1	fimbrial biogenesis usher protein
AEF05957.1	HAR9757638.1	fimbrial biogenesis usher protein BcfC
AEF05957.1	EJG9155260.1	fimbrial usher BcfC
AEF05957.1	WP_001245859.1	fimbrial usher BcfC
AEF05957.1	ECZ0168826.1	fimbrial biogenesis usher protein
AEF05957.1	EAB9098476.1	fimbrial biogenesis outer membrane usher protein
AEF05957.1	EBT0549150.1	fimbrial biogenesis outer membrane usher protein
AEF05957.1	ECM5552407.1	fimbrial biogenesis outer membrane usher protein
AEF05957.1	EAZ4263479.1	fimbrial biogenesis outer membrane usher protein
AEF05957.1	EIN8259100.1	fimbrial usher BcfC
AEF05957.1	EBR9314795.1	fimbrial biogenesis outer membrane usher protein
AEF05957.1	ECD8809813.1	fimbrial biogenesis outer membrane usher protein
AEF05957.1	EBG0701108.1	fimbrial biogenesis outer membrane usher protein
AEF05957.1	EGO3393804.1	fimbrial biogenesis usher protein BcfC
AEF05957.1	WP_149501920.1	fimbrial usher BcfC
AEF05957.1	EIO5140192.1	fimbrial usher BcfC
AEF05957.1	HAT0072300.1	fimbrial biogenesis usher protein BcfC
AEF05957.1	WP_254990873.1	MULTISPECIES: fimbrial usher BcfC
AEF05957.1	EBW7650295.1	fimbrial biogenesis outer membrane usher protein
AEF05957.1	EEO0020264.1	fimbrial biogenesis usher protein BcfC
AEF05957.1	EAB7365209.1	fimbrial biogenesis outer membrane usher protein
AEF05957.1	WP_080092666.1	fimbrial usher BcfC
AEF05957.1	WP_080223562.1	fimbrial usher BcfC
AEF05957.1	EDB3975620.1	fimbrial biogenesis usher protein
AEF05957.1	EEJ0094896.1	fimbrial biogenesis usher protein BcfC
AEF05957.1	EHR2398402.1	fimbrial usher BcfC
AEF05957.1	EBB0555499.1	fimbrial biogenesis outer membrane usher protein
AEF05957.1	EFS1288870.1	fimbrial biogenesis usher protein BcfC
AEF05957.1	EBY2273607.1	fimbrial biogenesis outer membrane usher protein
AEF05957.1	EBX3847444.1	fimbrial biogenesis outer membrane usher protein
AEF05957.1	ECO9299132.1	fimbrial biogenesis outer membrane usher protein
AEF05957.1	EGR8497102.1	fimbrial biogenesis usher protein BcfC
AEF05957.1	WP_023240184.1	fimbrial usher BcfC
AEF05957.1	EFQ8707517.1	fimbrial biogenesis usher protein BcfC
AEF05957.1	EFT9425799.1	fimbrial biogenesis usher protein BcfC
AEF05957.1	EBP7258396.1	fimbrial biogenesis outer membrane usher protein
AEF05957.1	EAT2104539.1	fimbrial biogenesis outer membrane usher protein
AEF05957.1	ECD1562764.1	fimbrial biogenesis outer membrane usher protein
AEF05957.1	WP_058657063.1	fimbrial usher BcfC
AEF05957.1	EBY5934942.1	fimbrial biogenesis outer membrane usher protein
AEF05957.1	EBU1145614.1	fimbrial biogenesis outer membrane usher protein
AEF05957.1	EJP3800946.1	fimbrial usher BcfC
AEF05957.1	EIO9143092.1	fimbrial usher BcfC
AEF05957.1	EHD4592673.1	fimbrial biogenesis usher protein BcfC
AEF05957.1	EBC5912441.1	fimbrial biogenesis outer membrane usher protein
AEF05957.1	EHW6646011.1	fimbrial usher BcfC
AEF05957.1	EAP3580458.1	fimbrial biogenesis outer membrane usher protein
AEF05957.1	ECN4692245.1	fimbrial biogenesis outer membrane usher protein
AEF05957.1	HBJ7460290.1	fimbrial usher BcfC
AEF05957.1	EBC4760543.1	fimbrial biogenesis outer membrane usher protein
AEF05957.1	ECY1101923.1	fimbrial biogenesis usher protein
AEF05957.1	WP_058644779.1	fimbrial usher BcfC
AEF05957.1	EGZ9827069.1	fimbrial biogenesis usher protein BcfC
AEF05957.1	EBW2012482.1	fimbrial biogenesis outer membrane usher protein
AEF05957.1	ECL4798570.1	fimbrial biogenesis outer membrane usher protein
AEF05957.1	EHI4450773.1	fimbrial biogenesis usher protein BcfC
AEF05957.1	EGB4286081.1	fimbrial biogenesis usher protein BcfC
AEF05957.1	EGB2631002.1	fimbrial biogenesis usher protein BcfC
AEF05957.1	HAB1868685.1	fimbrial biogenesis usher protein
AEF05957.1	EAS5725900.1	fimbrial biogenesis outer membrane usher protein
AEF05957.1	ECP6598439.1	fimbrial biogenesis outer membrane usher protein
AEF05957.1	WP_079830764.1	fimbrial usher BcfC
AEF05957.1	EAB2555622.1	fimbrial biogenesis outer membrane usher protein
AEF05957.1	EEC3850461.1	fimbrial biogenesis usher protein BcfC
AEF05957.1	EGV1431434.1	fimbrial biogenesis usher protein BcfC
AEF05957.1	EBU7129611.1	fimbrial biogenesis outer membrane usher protein
AEF05957.1	EEU8954479.1	fimbrial biogenesis usher protein BcfC
AEF05957.1	EBB8845764.1	fimbrial biogenesis outer membrane usher protein
AEF05957.1	EHC8839881.1	fimbrial biogenesis usher protein BcfC
AEF05957.1	EJS9012234.1	fimbrial usher BcfC
AEF05957.1	EJT4773865.1	fimbrial usher BcfC
AEF05957.1	ECE8564054.1	fimbrial biogenesis outer membrane usher protein
AEF05957.1	WP_022742593.1	fimbrial usher BcfC
AEF05957.1	EHZ9237291.1	fimbrial usher BcfC
AEF05957.1	EJP8868389.1	fimbrial usher BcfC
AEF05957.1	EDA5277128.1	fimbrial biogenesis usher protein
AEF05957.1	EDI1332046.1	fimbrial biogenesis usher protein BcfC
AEF05957.1	MBS2340162.1	fimbrial usher BcfC
AEF05957.1	EAP8807454.1	fimbrial biogenesis outer membrane usher protein
AEF05957.1	EAR5776404.1	fimbrial biogenesis outer membrane usher protein
AEF05957.1	EIN0100750.1	fimbrial usher BcfC
AEF05957.1	ECM6818994.1	fimbrial biogenesis outer membrane usher protein
AEF05957.1	HAV0798806.1	fimbrial biogenesis usher protein BcfC
AEF05957.1	EDT5326097.1	fimbrial biogenesis usher protein BcfC
AEF05957.1	EHS2480296.1	fimbrial usher BcfC
AEF05957.1	EBJ7303404.1	fimbrial biogenesis outer membrane usher protein
AEF05957.1	EAM1165579.1	fimbrial biogenesis outer membrane usher protein
AEF05957.1	EHB2076794.1	fimbrial biogenesis usher protein BcfC
AEF05957.1	EEO2171958.1	fimbrial biogenesis usher protein BcfC
AEF05957.1	EGM3871118.1	fimbrial biogenesis usher protein BcfC
AEF05957.1	EDM2637340.1	fimbrial biogenesis usher protein BcfC
AEF05957.1	EDK3865884.1	fimbrial biogenesis usher protein BcfC
AEF05957.1	ECW7154627.1	fimbrial biogenesis usher protein
AEF05957.1	ECM6567248.1	fimbrial biogenesis outer membrane usher protein
AEF05957.1	EJJ7995497.1	fimbrial usher BcfC
AEF05957.1	EDT0744403.1	fimbrial biogenesis usher protein BcfC
AEF05957.1	EGH9374070.1	fimbrial biogenesis usher protein BcfC
AEF05957.1	EBW5837806.1	fimbrial biogenesis outer membrane usher protein
AEF05957.1	HAD2526660.1	fimbrial biogenesis outer membrane usher protein
AEF05957.1	ECI9604268.1	fimbrial biogenesis outer membrane usher protein
AEF05957.1	EBG0251686.1	fimbrial biogenesis outer membrane usher protein
AEF05957.1	EBP6755040.1	fimbrial biogenesis outer membrane usher protein
AEF05957.1	EBD1082597.1	fimbrial biogenesis outer membrane usher protein
AEF05957.1	EBZ0868299.1	fimbrial biogenesis outer membrane usher protein
AEF05957.1	EBM1864671.1	fimbrial biogenesis outer membrane usher protein
AEF05957.1	ECN7721874.1	fimbrial biogenesis outer membrane usher protein
AEF05957.1	MEP26325.1	fimbrial biogenesis outer membrane usher protein
AEF05957.1	MBJ4527908.1	fimbrial usher BcfC
AEF05957.1	ECW0690150.1	fimbrial biogenesis usher protein
AEF05957.1	EAT9905567.1	fimbrial biogenesis outer membrane usher protein
AEF05957.1	EGX6680486.1	fimbrial biogenesis usher protein BcfC
AEF05957.1	EAO0544524.1	fimbrial biogenesis outer membrane usher protein
AEF05957.1	EDD5313268.1	fimbrial biogenesis usher protein
AEF05957.1	ECE9042800.1	fimbrial biogenesis outer membrane usher protein
AEF05957.1	EBM7536310.1	fimbrial biogenesis outer membrane usher protein
AEF05957.1	EBH7051168.1	fimbrial biogenesis outer membrane usher protein
AEF05957.1	ECB9344233.1	fimbrial biogenesis outer membrane usher protein
AEF05957.1	EJO3370275.1	fimbrial usher BcfC
AEF05957.1	EJH1456264.1	fimbrial usher BcfC
AEF05957.1	EBT6375710.1	fimbrial biogenesis outer membrane usher protein
AEF05957.1	EJN4736828.1	fimbrial usher BcfC
AEF05957.1	EIF9974395.1	fimbrial usher BcfC
AEF05957.1	EDK6624851.1	fimbrial biogenesis usher protein BcfC
AEF05957.1	EBU7299628.1	fimbrial biogenesis outer membrane usher protein
AEF05957.1	EBS4811586.1	fimbrial biogenesis outer membrane usher protein
AEF05957.1	EIE0162134.1	fimbrial usher BcfC
AEF05957.1	EBE7446658.1	fimbrial biogenesis outer membrane usher protein
AEF05957.1	EBS2158386.1	fimbrial biogenesis outer membrane usher protein
AEF05957.1	EFU6476944.1	fimbrial biogenesis usher protein BcfC
AEF05957.1	EIT2119787.1	fimbrial usher BcfC
AEF05957.1	EGG5039686.1	fimbrial biogenesis usher protein BcfC
AEF05957.1	ARE53946.1	Chitinase
AEF05957.1	EEB3405264.1	fimbrial biogenesis outer membrane usher protein
AEF05957.1	ECY2677703.1	fimbrial biogenesis usher protein
AEF05957.1	ECO7398604.1	fimbrial biogenesis outer membrane usher protein
AEF05957.1	EJV6541856.1	fimbrial usher BcfC
AEF05957.1	EAP1035884.1	fimbrial biogenesis outer membrane usher protein
AEF05957.1	EAB4419231.1	fimbrial biogenesis outer membrane usher protein
AEF05957.1	WP_183051806.1	fimbrial usher BcfC
AEF05957.1	HAD0570604.1	fimbrial biogenesis usher protein
AEF05957.1	EIE4085464.1	fimbrial usher BcfC
AEF05957.1	EAV2773288.1	fimbrial biogenesis outer membrane usher protein
AEF05957.1	HAG0004834.1	fimbrial biogenesis usher protein BcfC
AEF05957.1	EAW9334571.1	fimbrial biogenesis outer membrane usher protein
AEF05957.1	EBV4671925.1	fimbrial biogenesis outer membrane usher protein
AEF05957.1	EIA9134071.1	fimbrial usher BcfC
AEF05957.1	EAM8082937.1	fimbrial biogenesis outer membrane usher protein
AEF05957.1	EHA8058928.1	fimbrial biogenesis usher protein BcfC
AEF05957.1	EBY8916403.1	fimbrial biogenesis outer membrane usher protein
AEF05957.1	EDX5814496.1	fimbrial biogenesis usher protein BcfC
AEF05957.1	WP_079838610.1	fimbrial usher BcfC
AEF05957.1	HCA3415847.1	fimbrial usher BcfC
AEF05957.1	EIK4072641.1	fimbrial usher BcfC
AEF05957.1	EEE9592248.1	fimbrial biogenesis usher protein BcfC
AEF05957.1	EDR6861812.1	fimbrial biogenesis usher protein BcfC
AEF05957.1	EDD5905520.1	fimbrial biogenesis usher protein
AEF05957.1	EDF7430926.1	fimbrial biogenesis usher protein
AEF05957.1	WP_149488499.1	fimbrial usher BcfC
AEF05957.1	EBG7449052.1	fimbrial biogenesis outer membrane usher protein
AEF05957.1	ECL6158287.1	fimbrial biogenesis outer membrane usher protein
AEF05957.1	EIQ8593737.1	fimbrial usher BcfC
AEF05957.1	ECQ9788591.1	fimbrial biogenesis usher protein
AEF05957.1	EJP6340633.1	fimbrial usher BcfC
AEF05957.1	WP_258085809.1	fimbrial usher BcfC
AEF05957.1	ECF0131263.1	fimbrial biogenesis outer membrane usher protein
AEF05957.1	EIM7019980.1	fimbrial usher BcfC
AEF05957.1	EBY1119882.1	fimbrial biogenesis outer membrane usher protein
AEF05957.1	EBW0012961.1	fimbrial biogenesis outer membrane usher protein
AEF05957.1	EJN1909365.1	fimbrial usher BcfC
AEF05957.1	WP_183045041.1	fimbrial usher BcfC
AEF05957.1	EGN7322126.1	fimbrial biogenesis usher protein BcfC
AEF05957.1	EID4083432.1	fimbrial usher BcfC
AEF05957.1	EBX5309175.1	fimbrial biogenesis outer membrane usher protein
AEF05957.1	ECP2231919.1	fimbrial biogenesis usher protein
AEF05957.1	EBT0587394.1	fimbrial biogenesis outer membrane usher protein
AEF05957.1	EBK3276425.1	fimbrial biogenesis outer membrane usher protein
AEF05957.1	EAB2386711.1	fimbrial biogenesis outer membrane usher protein
AEF05957.1	EEI6227708.1	fimbrial biogenesis usher protein BcfC
AEF05957.1	EBV0271572.1	fimbrial biogenesis outer membrane usher protein
AEF05957.1	EAV3670330.1	fimbrial biogenesis outer membrane usher protein
AEF05957.1	EGN7267652.1	fimbrial biogenesis usher protein BcfC
AEF05957.1	WP_020999906.1	MULTISPECIES: fimbrial usher BcfC
AEF05957.1	EJB2466508.1	fimbrial usher BcfC
AEF05957.1	EAA8865361.1	fimbrial biogenesis outer membrane usher protein
AEF05957.1	EJL0844410.1	fimbrial usher BcfC
AEF05957.1	EAB5466649.1	fimbrial biogenesis outer membrane usher protein
AEF05957.1	EAA7177502.1	fimbrial biogenesis outer membrane usher protein
AEF05957.1	EJO0475986.1	fimbrial usher BcfC
AEF05957.1	EHC4317399.1	fimbrial biogenesis usher protein BcfC
AEF05957.1	EGG9326352.1	fimbrial biogenesis usher protein BcfC
AEF05957.1	WP_080202522.1	fimbrial usher BcfC
AEF05957.1	EHJ0313994.1	fimbrial biogenesis usher protein BcfC
AEF05957.1	EIO8466677.1	fimbrial usher BcfC
AEF05957.1	EAZ7740875.1	fimbrial biogenesis outer membrane usher protein
AEF05957.1	WP_079845655.1	fimbrial usher BcfC
AEF05957.1	EJB6373671.1	fimbrial usher BcfC
AEF05957.1	EBR5315900.1	fimbrial biogenesis outer membrane usher protein
AEF05957.1	EAB2452921.1	fimbrial biogenesis outer membrane usher protein
AEF05957.1	EHN7702186.1	fimbrial usher BcfC
AEF05957.1	WP_053299667.1	fimbrial usher BcfC
AEF05957.1	WP_058657920.1	fimbrial usher BcfC
AEF05957.1	EIF9119144.1	fimbrial usher BcfC
AEF05957.1	EJJ7635754.1	fimbrial usher BcfC
AEF05957.1	WP_227761559.1	fimbrial usher BcfC
AEF05957.1	EHT3393553.1	fimbrial usher BcfC
AEF05957.1	EAT9825340.1	fimbrial biogenesis outer membrane usher protein
AEF05957.1	EEA7110839.1	fimbrial biogenesis usher protein BcfC
AEF05957.1	WP_058813535.1	fimbrial usher BcfC
AEF05957.1	ECN1470997.1	fimbrial biogenesis outer membrane usher protein
AEF05957.1	EGJ7367875.1	fimbrial biogenesis usher protein BcfC
AEF05957.1	EEK6958686.1	fimbrial biogenesis outer membrane usher protein
AEF05957.1	EBD4528423.1	fimbrial biogenesis outer membrane usher protein
AEF05957.1	EEE2993327.1	fimbrial biogenesis usher protein BcfC
AEF05957.1	EBR5256084.1	fimbrial biogenesis outer membrane usher protein
AEF05957.1	EBC4249871.1	fimbrial biogenesis outer membrane usher protein
AEF05957.1	EEB8784981.1	fimbrial biogenesis usher protein BcfC
AEF05957.1	EBO2577160.1	fimbrial biogenesis outer membrane usher protein
AEF05957.1	ECC9592852.1	fimbrial biogenesis outer membrane usher protein
AEF05957.1	EAT0704515.1	fimbrial biogenesis outer membrane usher protein
AEF05957.1	EBX2364841.1	fimbrial biogenesis outer membrane usher protein
AEF05957.1	ECM2553235.1	fimbrial biogenesis outer membrane usher protein
AEF05957.1	EGR8045231.1	fimbrial biogenesis usher protein BcfC
AEF05957.1	EEF9703859.1	fimbrial biogenesis usher protein BcfC
AEF05957.1	EEU8662535.1	fimbrial biogenesis usher protein BcfC
AEF05957.1	WP_208206522.1	MULTISPECIES: fimbrial usher BcfC
AEF05957.1	EDF5613254.1	fimbrial biogenesis usher protein
AEF05957.1	HAG1692918.1	fimbrial biogenesis usher protein BcfC
AEF05957.1	EDH6977238.1	fimbrial biogenesis usher protein BcfC
AEF05957.1	EBL3199228.1	fimbrial biogenesis outer membrane usher protein
AEF05957.1	EAQ0419765.1	fimbrial biogenesis outer membrane usher protein
AEF05957.1	EBW4006852.1	fimbrial biogenesis outer membrane usher protein
AEF05957.1	EDU0379495.1	fimbrial biogenesis usher protein BcfC
AEF05957.1	EBC1723910.1	fimbrial biogenesis outer membrane usher protein
AEF05957.1	WP_094964987.1	fimbrial usher BcfC
AEF05957.1	EBW4358469.1	fimbrial biogenesis outer membrane usher protein
AEF05957.1	EBW5802764.1	fimbrial biogenesis outer membrane usher protein
AEF05957.1	ECK4875619.1	fimbrial biogenesis outer membrane usher protein
AEF05957.1	WP_023260985.1	fimbrial usher BcfC
AEF05957.1	WP_079828147.1	fimbrial usher BcfC
AEF05957.1	EBS3044677.1	fimbrial biogenesis outer membrane usher protein
AEF05957.1	EBE8373146.1	fimbrial biogenesis outer membrane usher protein
AEF05957.1	EEC1096610.1	fimbrial biogenesis usher protein BcfC
AEF05957.1	EII0539189.1	fimbrial usher BcfC
AEF05957.1	WP_050948217.1	fimbrial usher BcfC
AEF05957.1	HCB4364024.1	fimbrial usher BcfC
AEF05957.1	WP_080190804.1	fimbrial usher BcfC
AEF05957.1	EDX0369688.1	fimbrial biogenesis usher protein BcfC
AEF05957.1	EAY0102811.1	fimbrial biogenesis outer membrane usher protein
AEF05957.1	WP_050959625.1	fimbrial usher BcfC
AEF05957.1	WP_097376331.1	fimbrial usher BcfC
AEF05957.1	EGH8509938.1	fimbrial biogenesis usher protein BcfC
AEF05957.1	ECD0239541.1	fimbrial biogenesis outer membrane usher protein
AEF05957.1	ECB2148844.1	fimbrial biogenesis outer membrane usher protein
AEF05957.1	EAA2693208.1	fimbrial biogenesis outer membrane usher protein
AEF05957.1	ECD0765979.1	fimbrial biogenesis outer membrane usher protein
AEF05957.1	EJN4670297.1	fimbrial usher BcfC
AEF05957.1	EAR8315386.1	fimbrial biogenesis outer membrane usher protein
AEF05957.1	WP_080232475.1	fimbrial usher BcfC
AEF05957.1	EAQ4038176.1	fimbrial biogenesis outer membrane usher protein
AEF05957.1	EDQ9751018.1	fimbrial biogenesis usher protein BcfC
AEF05957.1	EBW8358971.1	fimbrial biogenesis outer membrane usher protein
AEF05957.1	EBX0629128.1	fimbrial biogenesis outer membrane usher protein
AEF05957.1	EAA2221204.1	fimbrial biogenesis outer membrane usher protein
AEF05957.1	EEA8258023.1	fimbrial biogenesis outer membrane usher protein
AEF05957.1	ECY3255582.1	fimbrial biogenesis usher protein
AEF05957.1	WP_079830472.1	fimbrial usher BcfC
AEF05957.1	EIG0024870.1	fimbrial usher BcfC
AEF05957.1	ECF3289581.1	fimbrial biogenesis outer membrane usher protein
AEF05957.1	EBV4118471.1	fimbrial biogenesis outer membrane usher protein
AEF05957.1	WP_058145265.1	fimbrial usher BcfC
AEF05957.1	ECO8070002.1	fimbrial biogenesis outer membrane usher protein
AEF05957.1	EBG0674860.1	fimbrial biogenesis outer membrane usher protein
AEF05957.1	WP_050943240.1	fimbrial usher BcfC
AEF05957.1	EAO6611418.1	fimbrial biogenesis outer membrane usher protein
AEF05957.1	MJL65373.1	fimbrial biogenesis outer membrane usher protein
AEF05957.1	EBG7469452.1	fimbrial biogenesis outer membrane usher protein
AEF05957.1	ECM1878972.1	fimbrial biogenesis outer membrane usher protein
AEF05957.1	WP_097368012.1	fimbrial usher BcfC
AEF05957.1	ECR7820964.1	fimbrial biogenesis usher protein
AEF05957.1	WP_001245865.1	MULTISPECIES: fimbrial usher BcfC
AEF05957.1	EBS3867830.1	fimbrial biogenesis outer membrane usher protein
AEF05957.1	WP_050959078.1	fimbrial usher BcfC
AEF05957.1	EEJ8888096.1	fimbrial biogenesis usher protein BcfC
AEF05957.1	ECA9841938.1	fimbrial biogenesis outer membrane usher protein
AEF05957.1	EHW4465565.1	fimbrial usher BcfC
AEF05957.1	ECU7777026.1	fimbrial biogenesis outer membrane usher protein
AEF05957.1	EAU8536598.1	fimbrial biogenesis outer membrane usher protein
AEF05957.1	EFP4561464.1	fimbrial biogenesis usher protein BcfC
AEF05957.1	WP_080214123.1	fimbrial usher BcfC
AEF05957.1	ECG1704077.1	fimbrial biogenesis outer membrane usher protein
AEF05957.1	EAB8532520.1	fimbrial biogenesis outer membrane usher protein
AEF05957.1	ECP5741718.1	fimbrial biogenesis outer membrane usher protein
AEF05957.1	WP_001245857.1	MULTISPECIES: fimbrial usher BcfC
AEF05957.1	WP_050953635.1	fimbrial usher BcfC
AEF05957.1	WP_080189469.1	fimbrial usher BcfC
AEF05957.1	EEA1215440.1	fimbrial biogenesis outer membrane usher protein
AEF05957.1	EHW2220006.1	fimbrial usher BcfC
AEF05957.1	EAY1389845.1	fimbrial biogenesis outer membrane usher protein
AEF05957.1	WP_079788412.1	MULTISPECIES: fimbrial usher BcfC
AEF05957.1	EBQ2713340.1	fimbrial biogenesis outer membrane usher protein
AEF05957.1	EBV8579259.1	fimbrial biogenesis outer membrane usher protein
AEF05957.1	EIE8164987.1	fimbrial usher BcfC
AEF05957.1	EDN5528671.1	fimbrial biogenesis usher protein BcfC
AEF05957.1	EAB4480068.1	fimbrial biogenesis outer membrane usher protein
AEF05957.1	HAF4875723.1	fimbrial biogenesis usher protein BcfC
AEF05957.1	ACH52718.1	outer membrane usher protein FimD
AEF05957.1	WP_079958698.1	fimbrial usher BcfC
AEF05957.1	WP_080192338.1	MULTISPECIES: fimbrial usher BcfC
AEF05957.1	WP_001245853.1	MULTISPECIES: fimbrial usher BcfC
AEF05957.1	EAT0840775.1	fimbrial biogenesis outer membrane usher protein
AEF05957.1	ECD8924459.1	fimbrial biogenesis outer membrane usher protein
AEF05957.1	EAM8571123.1	fimbrial biogenesis outer membrane usher protein
AEF05957.1	ECD4284333.1	fimbrial biogenesis outer membrane usher protein
AEF05957.1	EBW1517066.1	fimbrial biogenesis outer membrane usher protein
AEF05957.1	WP_064047517.1	fimbrial usher BcfC
AEF05957.1	EIB7875949.1	fimbrial usher BcfC
AEF05957.1	WP_179678783.1	fimbrial usher BcfC
AEF05957.1	EAA8523249.1	fimbrial biogenesis outer membrane usher protein
AEF05957.1	EAT0076581.1	fimbrial biogenesis outer membrane usher protein
AEF05957.1	WP_053295693.1	fimbrial usher BcfC
AEF05957.1	EDG5399299.1	fimbrial biogenesis usher protein
AEF05957.1	EDZ35559.1	fimbrial usher protein
AEF05957.1	EBW7000614.1	fimbrial biogenesis outer membrane usher protein
AEF05957.1	EBS3706187.1	fimbrial biogenesis outer membrane usher protein
AEF05957.1	EDJ9060287.1	fimbrial biogenesis usher protein BcfC
AEF05957.1	EEI7992270.1	fimbrial biogenesis usher protein BcfC
AEF05957.1	EBY1786033.1	fimbrial biogenesis outer membrane usher protein
AEF05957.1	EEL6664319.1	fimbrial biogenesis outer membrane usher protein
AEF05957.1	WP_022630071.1	fimbrial usher BcfC
AEF05957.1	EIA6904106.1	fimbrial usher BcfC
AEF05957.1	EDX46794.1	outer membrane usher protein FimD
AEF05957.1	EDQ1357504.1	fimbrial biogenesis usher protein BcfC
AEF05957.1	EBG3701545.1	fimbrial biogenesis outer membrane usher protein
AEF05957.1	EDU6113318.1	fimbrial biogenesis usher protein BcfC
AEF05957.1	WP_099800557.1	fimbrial usher BcfC
AEF05957.1	EBS1066115.1	fimbrial biogenesis outer membrane usher protein
AEF05957.1	HAZ3066974.1	fimbrial biogenesis usher protein BcfC
AEF05957.1	EHB8845389.1	fimbrial biogenesis usher protein BcfC
AEF05957.1	EBY5994573.1	fimbrial biogenesis outer membrane usher protein
AEF05957.1	EAN6350148.1	fimbrial biogenesis outer membrane usher protein
AEF05957.1	EDS5421238.1	fimbrial biogenesis usher protein BcfC
AEF05957.1	EAW3048167.1	fimbrial biogenesis outer membrane usher protein
AEF05957.1	EHJ4214158.1	fimbrial biogenesis usher protein BcfC
AEF05957.1	WP_277914811.1	fimbrial usher BcfC
AEF05957.1	EAB3866360.1	fimbrial biogenesis outer membrane usher protein
AEF05957.1	EAX5272452.1	fimbrial biogenesis outer membrane usher protein
AEF05957.1	WP_023242935.1	fimbrial usher BcfC
AEF05957.1	EBN9516762.1	fimbrial biogenesis outer membrane usher protein
AEF05957.1	WP_058116228.1	fimbrial usher BcfC
AEF05957.1	WP_197392434.1	fimbrial usher BcfC
AEF05957.1	EDQ0338632.1	fimbrial biogenesis usher protein BcfC
AEF05957.1	EGG5674332.1	fimbrial biogenesis usher protein BcfC
AEF05957.1	EBY8832902.1	fimbrial biogenesis outer membrane usher protein
AEF05957.1	EDP9632097.1	fimbrial biogenesis usher protein BcfC
AEF05957.1	EDN4439126.1	fimbrial biogenesis usher protein BcfC
AEF05957.1	WP_079928142.1	MULTISPECIES: fimbrial usher BcfC
AEF05957.1	MBH0709310.1	fimbrial usher BcfC
AEF05957.1	EAQ1859147.1	fimbrial biogenesis outer membrane usher protein
AEF05957.1	MBH0685398.1	fimbrial usher BcfC
AEF05957.1	EBM1284050.1	fimbrial biogenesis outer membrane usher protein
AEF05957.1	EBI4384785.1	fimbrial biogenesis outer membrane usher protein
AEF05957.1	ECB6104841.1	fimbrial biogenesis outer membrane usher protein
AEF05957.1	WP_079839752.1	fimbrial usher BcfC
AEF05957.1	EBI3393636.1	fimbrial biogenesis outer membrane usher protein
AEF05957.1	ECL5363601.1	fimbrial biogenesis outer membrane usher protein
AEF05957.1	WP_076741928.1	fimbrial usher BcfC
AEF05957.1	ECU6292492.1	fimbrial biogenesis outer membrane usher protein
AEF05957.1	EBU1283529.1	fimbrial biogenesis outer membrane usher protein
AEF05957.1	EDR2655037.1	fimbrial biogenesis usher protein BcfC
AEF05957.1	WP_094897410.1	fimbrial usher BcfC
AEF05957.1	WP_023209311.1	fimbrial usher BcfC
AEF05957.1	WP_058108266.1	fimbrial usher BcfC
AEF05957.1	EBX0406534.1	fimbrial biogenesis outer membrane usher protein
AEF05957.1	EDS3574227.1	fimbrial biogenesis usher protein BcfC
AEF05957.1	WP_069057531.1	fimbrial usher BcfC
AEF05957.1	EBS0638832.1	fimbrial biogenesis outer membrane usher protein
AEF05957.1	HBL3922906.1	fimbrial usher BcfC
AEF05957.1	HCA3880431.1	fimbrial usher BcfC
AEF05957.1	ECJ9112751.1	fimbrial biogenesis outer membrane usher protein
AEF05957.1	EDZ2294040.1	fimbrial biogenesis usher protein BcfC
AEF05957.1	EJN7347744.1	fimbrial usher BcfC
AEF05957.1	WP_045341694.1	fimbrial usher BcfC
AEF05957.1	EDQ2604245.1	fimbrial biogenesis usher protein BcfC
AEF05957.1	EGG8168109.1	fimbrial biogenesis usher protein BcfC
AEF05957.1	EGM3443090.1	fimbrial biogenesis usher protein BcfC
AEF05957.1	EBW7490648.1	fimbrial biogenesis outer membrane usher protein
AEF05957.1	EAA9294767.1	fimbrial biogenesis outer membrane usher protein
AEF05957.1	EAW8507585.1	fimbrial biogenesis outer membrane usher protein
AEF05957.1	ECI4084671.1	fimbrial biogenesis outer membrane usher protein
AEF05957.1	EAQ5910629.1	fimbrial biogenesis outer membrane usher protein
AEF05957.1	EAA6786915.1	fimbrial biogenesis outer membrane usher protein
AEF05957.1	EDV5596949.1	fimbrial biogenesis usher protein BcfC
AEF05957.1	EBR2639628.1	fimbrial biogenesis outer membrane usher protein
AEF05957.1	EJT0539703.1	fimbrial usher BcfC
AEF05957.1	HAG3147166.1	fimbrial biogenesis usher protein BcfC
AEF05957.1	EBC5720969.1	fimbrial biogenesis outer membrane usher protein
AEF05957.1	EAN9640585.1	fimbrial biogenesis outer membrane usher protein
AEF05957.1	WP_076736680.1	fimbrial usher BcfC
AEF05957.1	EDQ9165332.1	fimbrial biogenesis usher protein BcfC
AEF05957.1	EBO3325625.1	fimbrial biogenesis outer membrane usher protein
AEF05957.1	EJW6608024.1	fimbrial usher BcfC
AEF05957.1	WP_116781712.1	fimbrial usher BcfC
AEF05957.1	ECV0473450.1	fimbrial biogenesis outer membrane usher protein
AEF05957.1	EIX6685135.1	fimbrial usher BcfC
AEF05957.1	ECJ4298447.1	fimbrial biogenesis outer membrane usher protein
AEF05957.1	EBZ1575842.1	fimbrial biogenesis outer membrane usher protein
AEF05957.1	EBL5534582.1	fimbrial biogenesis outer membrane usher protein
AEF05957.1	WP_131087346.1	fimbrial usher BcfC
AEF05957.1	EDZ9549053.1	fimbrial biogenesis usher protein BcfC
AEF05957.1	EBE2241690.1	fimbrial biogenesis outer membrane usher protein
AEF05957.1	EBX1226698.1	fimbrial biogenesis outer membrane usher protein
AEF05957.1	EBM6190996.1	fimbrial biogenesis outer membrane usher protein
AEF05957.1	EAR5173742.1	fimbrial biogenesis outer membrane usher protein
AEF05957.1	ECQ6420729.1	fimbrial biogenesis usher protein
AEF05957.1	ECK7095007.1	fimbrial biogenesis outer membrane usher protein
AEF05957.1	EDW0314359.1	fimbrial biogenesis usher protein BcfC
AEF05957.1	EBG7794674.1	fimbrial biogenesis outer membrane usher protein
AEF05957.1	EIV0182437.1	fimbrial usher BcfC
AEF05957.1	EEI0976441.1	fimbrial biogenesis usher protein BcfC
AEF05957.1	EHA8556471.1	fimbrial biogenesis usher protein BcfC
AEF05957.1	WP_001245849.1	fimbrial usher BcfC
AEF05957.1	EDJ3364360.1	fimbrial biogenesis usher protein BcfC
AEF05957.1	EJI4352154.1	fimbrial usher BcfC
AEF05957.1	HBL9984487.1	fimbrial usher BcfC
AEF05957.1	WP_116723007.1	fimbrial usher BcfC
AEF05957.1	EIA5870128.1	fimbrial usher BcfC
AEF05959.1	WP_001082039.1	MULTISPECIES: fimbrial protein BcfE
AEF05959.1	EAW3795335.1	fimbrial protein BcfE
AEF05959.1	AFD57072.1	fimbrial subunit
AEF05959.1	EFX47479.1	type 1 fimbrae adaptor subunit FimF
AEF05959.1	EGH5027319.1	fimbrial protein BcfE
AEF05959.1	EGJ0868701.1	fimbrial protein BcfE
AEF05959.1	EDH2028606.1	fimbrial protein BcfE
AEF05959.1	WP_050962172.1	fimbrial protein BcfE
AEF05959.1	HAK1829134.1	fimbrial protein BcfE
AEF05959.1	EDW1589026.1	fimbrial protein BcfE
AEF05959.1	EJA3512106.1	fimbrial protein BcfE
AEF05959.1	EDE2635915.1	fimbrial protein BcfE
AEF05959.1	WP_071055496.1	fimbrial protein BcfE
AEF05959.1	WP_247224121.1	fimbrial protein BcfE
AEF05959.1	EAU1801490.1	fimbrial protein BcfE
AEF05959.1	ECI3616683.1	fimbrial protein
AEF05959.1	EIJ8052257.1	fimbrial protein BcfE
AEF05959.1	WP_263936169.1	fimbrial protein BcfE
AEF05959.1	WP_001082038.1	MULTISPECIES: fimbrial protein BcfE
AEF05959.1	EDJ8935923.1	fimbrial protein
AEF05959.1	EHR6354386.1	fimbrial protein BcfE
AEF05959.1	WP_023234405.1	fimbrial protein BcfE
AEF05959.1	WP_052932309.1	fimbrial protein BcfE
AEF05959.1	ECC1817560.1	fimbrial protein BcfE
AEF05959.1	EHD9482430.1	fimbrial protein BcfE
AEF05959.1	EAP9987077.1	fimbrial protein BcfE
AEF05959.1	WP_084567806.1	fimbrial protein BcfE
AEF05959.1	EBI7679886.1	fimbrial protein BcfE
AEF05959.1	WP_185609411.1	fimbrial protein BcfE
AEF05959.1	EDW3646098.1	fimbrial protein BcfE
AEF05959.1	EEN7557938.1	fimbrial protein BcfE
AEF05959.1	EGU5504379.1	fimbrial protein BcfE
AEF05959.1	ECP0426867.1	fimbrial protein BcfE
AEF05959.1	EBW5202202.1	fimbrial protein
AEF05959.1	EHH9166933.1	fimbrial protein BcfE
AEF05959.1	EIK5080135.1	fimbrial protein BcfE
AEF05959.1	WP_097103409.1	fimbrial protein BcfE
AEF05959.1	EAY5963069.1	fimbrial protein BcfE
AEF05959.1	EJJ9224366.1	fimbrial protein BcfE
AEF05959.1	WP_227241868.1	fimbrial protein BcfE
AEF05959.1	WP_050947860.1	MULTISPECIES: fimbrial protein BcfE
AEF05959.1	EGL1613407.1	fimbrial protein BcfE
AEF05959.1	HAB2293552.1	fimbrial protein BcfE
AEF05959.1	EBN2382078.1	fimbrial protein
AEF05959.1	ECH8319220.1	fimbrial protein BcfE
AEF05959.1	EDB6172258.1	fimbrial protein BcfE
AEF05959.1	EHE4296519.1	fimbrial protein BcfE
AEF05959.1	ECS5736596.1	fimbrial protein BcfE
AEF05959.1	EEJ9117525.1	fimbrial protein BcfE
AEF05959.1	EGJ2157585.1	fimbrial protein BcfE
AEF05959.1	WP_070130688.1	fimbrial protein BcfE
AEF05959.1	ECT6831855.1	fimbrial protein BcfE
AEF05959.1	HAG3536777.1	fimbrial protein BcfE
AEF05959.1	ECM8824016.1	fimbrial protein BcfE
AEF05959.1	ECA9717624.1	fimbrial protein BcfE
AEF05959.1	EAO4987279.1	fimbrial protein BcfE
AEF05959.1	EBY1516869.1	fimbrial protein
AEF05959.1	EHJ6229698.1	fimbrial protein BcfE
AEF05959.1	WP_070793522.1	fimbrial protein BcfE
AEF05959.1	ECW9013691.1	fimbrial protein BcfE
AEF05959.1	EHN3241517.1	fimbrial protein BcfE
AEF05959.1	ECF1316442.1	fimbrial protein BcfE
AEF05959.1	EBV7060365.1	fimbrial protein BcfE
AEF05959.1	KMJ62426.1	fimbrial protein
AEF05959.1	EBI7144046.1	fimbrial protein BcfE
AEF05959.1	EJW7291476.1	fimbrial protein BcfE
AEF05959.1	VEA57866.1	fimbrial subunit
AEF05959.1	WP_001529900.1	fimbrial protein BcfE
AEF05959.1	ETC20574.1	fimbrial protein BcfE
AEF05959.1	AEZ43791.1	Fimbrial subunit
AEF05959.1	VEA88222.1	fimbrial subunit
AEF05959.1	EEH9726346.1	fimbrial protein BcfE
AEF05959.1	WP_015406140.1	MULTISPECIES: fimbrial protein BcfE
AEF05959.1	EBS3044675.1	fimbrial protein
AEF05959.1	EEB2107069.1	fimbrial protein BcfE
AEF05959.1	HCB4364026.1	fimbrial protein BcfE
AEF05959.1	EGG9043495.1	fimbrial protein BcfE
AEF05959.1	EGK1812445.1	fimbrial protein BcfE
AEF05959.1	WP_208293121.1	MULTISPECIES: fimbrial protein BcfE
AEF05959.1	WP_080219694.1	fimbrial protein BcfE
AEF05959.1	WP_024148244.1	fimbrial protein BcfE
AEF05959.1	EDX2598721.1	fimbrial protein BcfE
AEF05959.1	EHO4613059.1	fimbrial protein BcfE
AEF05959.1	WP_156016553.1	fimbrial protein BcfE
AEF05959.1	ECR8350406.1	fimbrial protein BcfE
AEF05959.1	EBG5301607.1	fimbrial protein BcfE
AEF05959.1	EAA9162573.1	fimbrial protein BcfE
AEF05959.1	EBR0151413.1	fimbrial protein
AEF05959.1	EBI2595537.1	fimbrial protein BcfE
AEF05959.1	EBE7905344.1	fimbrial protein BcfE
AEF05959.1	ECK6621196.1	fimbrial protein BcfE
AEF05959.1	WP_114050526.1	fimbrial protein BcfE
AEF05959.1	EBT4464773.1	fimbrial protein BcfE
AEF05959.1	WP_130548903.1	fimbrial protein BcfE
AEF05959.1	EHR3422309.1	fimbrial protein BcfE
AEF05959.1	WP_061380423.1	fimbrial protein BcfE
AEF05959.1	EIR0332238.1	fimbrial protein BcfE
AEF05959.1	WP_024798858.1	fimbrial protein BcfE
AEF05959.1	EBE1284879.1	fimbrial protein BcfE
AEF05959.1	EJH8065830.1	fimbrial protein BcfE
AEF05959.1	EDL4321360.1	fimbrial protein
AEF05959.1	EBG4952771.1	fimbrial protein BcfE
AEF05959.1	EBI2046842.1	fimbrial protein BcfE
AEF05959.1	EIR9566679.1	fimbrial protein BcfE
AEF05959.1	EAW0247859.1	fimbrial protein BcfE
AEF05959.1	EAO9233957.1	fimbrial protein BcfE
AEF05959.1	WP_202099332.1	fimbrial protein BcfE
AEF05959.1	WP_001082036.1	MULTISPECIES: fimbrial protein BcfE
AEF05959.1	EBE6952824.1	fimbrial protein BcfE
AEF05959.1	EAA1657535.1	fimbrial protein
AEF05959.1	EBD5119334.1	fimbrial protein BcfE
AEF05959.1	EBX4667520.1	fimbrial protein
AEF05959.1	EBI2788189.1	fimbrial protein
AEF05959.1	ECS7495113.1	fimbrial protein BcfE
AEF05959.1	EAN1247141.1	fimbrial protein BcfE
AEF05959.1	EFQ2858301.1	fimbrial protein BcfE
AEF05959.1	WP_183056304.1	fimbrial protein BcfE
AEF05959.1	EBE5613550.1	fimbrial protein BcfE
AEF05959.1	EDV1006342.1	fimbrial protein BcfE
AEF05959.1	WP_038393930.1	fimbrial protein BcfE
AEF05959.1	EAQ4237415.1	fimbrial protein BcfE
AEF05959.1	EBY9282138.1	fimbrial protein BcfE
AEF05959.1	EDV1837980.1	fimbrial protein BcfE
AEF05959.1	WP_023244482.1	MULTISPECIES: fimbrial protein BcfE
AEF05959.1	HAF1208289.1	fimbrial protein BcfE
AEF05959.1	EGK7521689.1	fimbrial protein BcfE
AEF05959.1	EAR9713362.1	fimbrial protein BcfE
AEF05959.1	EAA8393130.1	fimbrial protein BcfE
AEF05959.1	WP_069721570.1	fimbrial protein BcfE
AEF05959.1	ECJ8739395.1	fimbrial protein BcfE
AEF05959.1	EDI9418632.1	fimbrial protein
AEF05959.1	ECF2752450.1	fimbrial protein BcfE
AEF05959.1	EHO0429166.1	fimbrial protein BcfE
AEF05959.1	WP_109188249.1	fimbrial protein BcfE
AEF05959.1	EEC2639947.1	fimbrial protein BcfE
AEF05959.1	EAO8387584.1	fimbrial protein BcfE
AEF05959.1	EDT0682558.1	fimbrial protein BcfE
AEF05959.1	WP_080081445.1	fimbrial protein BcfE
AEF05959.1	EBZ6540438.1	fimbrial protein BcfE
AEF05959.1	WP_114043284.1	fimbrial protein BcfE
AEF05959.1	EAA3445163.1	fimbrial protein
AEF05959.1	WP_023226882.1	MULTISPECIES: fimbrial protein BcfE
AEF05959.1	KCU92840.1	fimbrial protein BcfE
AEF05959.1	EEH2282559.1	fimbrial protein BcfE
AEF05959.1	EEG1525248.1	fimbrial protein BcfE
AEF05959.1	EGL8373377.1	fimbrial protein BcfE
AEF05959.1	ECU7837452.1	fimbrial protein BcfE
AEF05959.1	EEA7742000.1	fimbrial protein BcfE
AEF05959.1	EIJ9935616.1	fimbrial protein BcfE
AEF05959.1	EEN1982501.1	fimbrial protein BcfE
AEF05959.1	EGI1379378.1	fimbrial protein BcfE
AEF05959.1	HBL4298904.1	fimbrial protein BcfE
AEF05959.1	EAW0637524.1	fimbrial protein BcfE
AEF05959.1	EIK0116612.1	fimbrial protein BcfE
AEF05959.1	ECT4710640.1	fimbrial protein BcfE
AEF05959.1	EBG5593378.1	fimbrial protein BcfE
AEF05959.1	EAA1841322.1	fimbrial protein
AEF05959.1	EAW1180338.1	fimbrial protein BcfE
AEF05959.1	WP_001082042.1	MULTISPECIES: fimbrial protein BcfE
AEF05959.1	WP_124741016.1	fimbrial protein BcfE
AEF05959.1	EDT8140774.1	fimbrial protein BcfE
AEF05959.1	EJO4283612.1	fimbrial protein BcfE
AEF05959.1	WP_023181313.1	fimbrial protein BcfE
AEF05959.1	ECV4083449.1	fimbrial protein BcfE
AEF05959.1	ECQ0816009.1	fimbrial protein BcfE
AEF05959.1	EDS3574225.1	fimbrial protein BcfE
AEF05959.1	EDL0707151.1	fimbrial protein
AEF05959.1	EDI9496466.1	fimbrial protein
AEF05959.1	EFU9261329.1	fimbrial protein BcfE
AEF05959.1	EJX0281690.1	fimbrial protein BcfE
AEF05959.1	EGL8957575.1	fimbrial protein BcfE
AEF05959.1	WP_079820741.1	fimbrial protein BcfE
AEF05959.1	EAS1902842.1	fimbrial protein BcfE
AEF05959.1	EAA6272557.1	fimbrial protein
AEF05959.1	WP_119011734.1	fimbrial protein BcfE
AEF05959.1	EFQ2510837.1	fimbrial protein BcfE
AEF05959.1	EGL3423547.1	fimbrial protein BcfE
AEF05959.1	WP_023254456.1	fimbrial protein BcfE
AEF05959.1	WP_024145771.1	fimbrial protein BcfE
AEF05959.1	WP_183051628.1	fimbrial protein BcfE
AEF05959.1	EAV6690700.1	fimbrial protein BcfE
AEF05959.1	EEH5675773.1	fimbrial protein BcfE
AEF05959.1	EEF3252326.1	fimbrial protein BcfE
AEF05959.1	HAG2477368.1	fimbrial protein BcfE
AEF05959.1	EBO8099441.1	fimbrial protein BcfE
AEF05959.1	EIM9000398.1	fimbrial protein BcfE
AEF05959.1	EHD8279779.1	fimbrial protein BcfE
AEF05959.1	WP_106806066.1	fimbrial protein BcfE
AEF05959.1	EGT8146213.1	fimbrial protein BcfE
AEF05959.1	WP_063809572.1	fimbrial protein BcfE
AEF05959.1	ECV1305434.1	fimbrial protein BcfE
AEF05959.1	EGI5703443.1	fimbrial protein BcfE
AEF05959.1	EAA9783398.1	fimbrial protein BcfE
AEF05959.1	WP_079947050.1	fimbrial protein BcfE
AEF05959.1	WP_001082040.1	fimbrial protein BcfE
AEF05959.1	WP_024159099.1	fimbrial protein BcfE
AEF05959.1	ECD2671530.1	fimbrial protein BcfE
AEF05959.1	WP_098065475.1	fimbrial protein BcfE
AEF05959.1	WP_023229663.1	fimbrial protein BcfE
AEF05959.1	EAS3727042.1	fimbrial protein BcfE
AEF05959.1	EDJ7221864.1	fimbrial protein
AEF05959.1	EJI7843847.1	fimbrial protein BcfE
AEF05959.1	EDB4403429.1	fimbrial protein BcfE
AEF05959.1	EHK0346116.1	fimbrial protein BcfE
AEF05959.1	EIL4796496.1	fimbrial protein BcfE
AEF05959.1	ECF3523704.1	fimbrial protein BcfE
AEF05959.1	EFT9425797.1	fimbrial protein BcfE
AEF05959.1	EDT6625129.1	fimbrial protein BcfE
AEF05959.1	EBY0731220.1	fimbrial protein
AEF05959.1	EBE2636892.1	fimbrial protein BcfE
AEF05959.1	WP_103133562.1	fimbrial protein BcfE
AEF05959.1	WP_024156539.1	fimbrial protein BcfE
AEF05959.1	EBK6121977.1	fimbrial protein
AEF05959.1	WP_023240183.1	fimbrial protein BcfE
AEF05959.1	AZT78039.1	fimbrial protein BcfE
AEF05959.1	EBZ3188780.1	fimbrial protein BcfE
AEF05959.1	EAM1731531.1	fimbrial protein BcfE
AEF05959.1	TGD41425.1	fimbrial protein
AEF05959.1	EGM4224021.1	fimbrial protein BcfE
AEF05959.1	EDR5131391.1	fimbrial protein BcfE
AEF05959.1	EDT7433258.1	fimbrial protein BcfE
AEF05959.1	EBR3742172.1	fimbrial protein BcfE
AEF05959.1	WP_135493923.1	fimbrial protein BcfE
AEF05959.1	EDR4119922.1	fimbrial protein BcfE
AEF05959.1	WP_277803486.1	fimbrial protein BcfE
AEF05959.1	EBV1856585.1	fimbrial protein
AEF05959.1	EAB2724230.1	fimbrial protein BcfE
AEF05959.1	ECP9811074.1	fimbrial protein BcfE
AEF05959.1	EHK0686151.1	fimbrial protein BcfE
AEF05959.1	HCH9294429.1	fimbrial protein BcfE
AEF05959.1	EAO8404706.1	fimbrial protein BcfE
AEF05959.1	EDV0415499.1	fimbrial protein BcfE
AEF05959.1	WP_058653132.1	fimbrial protein BcfE
AEF05959.1	HBM0187466.1	fimbrial protein BcfE
AEF05959.1	EDL4099756.1	fimbrial protein
AEF05959.1	ECD6715862.1	fimbrial protein BcfE
AEF05959.1	EDH6851636.1	fimbrial protein
AEF05959.1	EBX6510309.1	fimbrial protein
AEF05959.1	EBZ0984328.1	fimbrial protein BcfE
AEF05959.1	EDQ7480424.1	fimbrial protein BcfE
AEF05959.1	ECM9799975.1	fimbrial protein BcfE
AEF05959.1	EAM2929240.1	fimbrial protein BcfE
AEF05959.1	EIT4164109.1	fimbrial protein BcfE
AEF05959.1	HAC7287404.1	fimbrial protein BcfE
AEF05959.1	ECD3283875.1	fimbrial protein BcfE
AEF05959.1	EGM0259685.1	fimbrial protein BcfE
AEF05959.1	EJL8542693.1	fimbrial protein BcfE
AEF05959.1	EAV0522185.1	fimbrial protein BcfE
AEF05959.1	EDG8079282.1	fimbrial protein BcfE
AEF05959.1	EAT7027111.1	fimbrial protein BcfE
AEF05959.1	EAQ1073580.1	fimbrial protein BcfE
AEF05959.1	EHM4153440.1	fimbrial protein BcfE
AEF05959.1	EIE0162136.1	fimbrial protein BcfE
AEF05959.1	WP_024155226.1	fimbrial protein BcfE
AEF05959.1	EGW1240145.1	fimbrial protein BcfE
AEF05959.1	EAB2400456.1	fimbrial protein BcfE
AEF05959.1	HBJ3051072.1	fimbrial protein BcfE
AEF05959.1	EGM2642555.1	fimbrial protein BcfE
AEF05959.1	EAR7244985.1	fimbrial protein BcfE
AEF05959.1	EJK1377154.1	fimbrial protein BcfE
AEF05959.1	EBD3311229.1	fimbrial protein BcfE
AEF05959.1	EBG9722780.1	fimbrial protein BcfE
AEF05959.1	EJE7488233.1	fimbrial protein BcfE
AEF05959.1	EAA8033564.1	fimbrial protein BcfE
AEF05959.1	ECD5488212.1	fimbrial protein BcfE
AEF05959.1	EBX8756865.1	fimbrial protein
AEF05959.1	EAP3916127.1	fimbrial protein BcfE
AEF05959.1	EAU5920095.1	fimbrial protein BcfE
AEF05959.1	ECW3429069.1	fimbrial protein BcfE
AEF05959.1	EAO0853460.1	fimbrial protein BcfE
AEF05959.1	EBZ8319472.1	fimbrial protein BcfE
AEF05959.1	EDB8402213.1	fimbrial protein BcfE
AEF05959.1	EFS0200761.1	fimbrial protein BcfE
AEF05959.1	EBY3006580.1	fimbrial protein
AEF05959.1	EBX8088054.1	fimbrial protein
AEF05959.1	EDH2681031.1	fimbrial protein BcfE
AEF05959.1	EAV6406079.1	fimbrial protein BcfE
AEF05959.1	EBG0648377.1	fimbrial protein BcfE
AEF05959.1	EBJ0106128.1	fimbrial protein
AEF05959.1	EBL7718727.1	fimbrial protein BcfE
AEF05959.1	WP_106104565.1	fimbrial protein BcfE
AEF05959.1	EAM2043751.1	fimbrial protein BcfE
AEF05959.1	EAA3640133.1	fimbrial protein
AEF05959.1	WP_076928097.1	fimbrial protein BcfE
AEF05959.1	ECY1101921.1	fimbrial protein BcfE
AEF05959.1	EDV3395524.1	fimbrial protein BcfE
AEF05959.1	EIC9759452.1	fimbrial protein BcfE
AEF05959.1	EAM3618416.1	fimbrial protein BcfE
AEF05959.1	WP_179225787.1	fimbrial protein BcfE
AEF05959.1	EIT9254140.1	fimbrial protein BcfE
AEF05959.1	EHW0559032.1	fimbrial protein BcfE
AEF05959.1	EBK0859887.1	fimbrial protein BcfE
AEF05959.1	EBH6994768.1	fimbrial protein BcfE
AEF05959.1	EJD2371240.1	fimbrial protein BcfE
AEF05959.1	EFQ6938042.1	fimbrial protein BcfE
AEF05959.1	HCH8742384.1	fimbrial protein BcfE
AEF05959.1	EBG3171212.1	fimbrial protein BcfE
AEF05959.1	EEM8595146.1	fimbrial protein BcfE
AEF05959.1	EBZ0713668.1	fimbrial protein BcfE
AEF05959.1	WP_168999147.1	fimbrial protein BcfE
AEF05959.1	ECL1316051.1	fimbrial protein BcfE
AEF05959.1	EBS6150938.1	fimbrial protein
AEF05959.1	ECE0873338.1	fimbrial protein BcfE
AEF05959.1	EBL2244274.1	fimbrial protein BcfE
AEF05959.1	EBW7160238.1	fimbrial protein
AEF05959.1	EBK5857132.1	fimbrial protein
AEF05959.1	EFU0337843.1	fimbrial protein BcfE
AEF05959.1	EIA0472309.1	fimbrial protein BcfE
AEF05959.1	EDZ08969.1	fimbrial subunit
AEF05959.1	ECR1177935.1	fimbrial protein BcfE
AEF05959.1	VGM89665.1	type 1 fimbrae adaptor subunit FimF
AEF05959.1	WP_020936816.1	MULTISPECIES: fimbrial protein BcfE
AEF05959.1	WP_058648978.1	fimbrial protein BcfE
AEF05959.1	EII3749366.1	fimbrial protein BcfE
AEF05959.1	EDT4841341.1	fimbrial protein BcfE
AEF05959.1	EAB9909298.1	fimbrial protein BcfE
AEF05959.1	EBX1354936.1	fimbrial protein
AEF05959.1	EAA7241750.1	fimbrial protein BcfE
AEF05959.1	WP_023182482.1	fimbrial protein BcfE
AEF05959.1	EGQ4759333.1	fimbrial protein BcfE
AEF05959.1	EAV3121901.1	fimbrial protein BcfE
AEF05959.1	EFQ1956639.1	fimbrial protein BcfE
AEF05959.1	WP_079945485.1	fimbrial protein BcfE
AEF05959.1	ECJ9598761.1	fimbrial protein BcfE
AEF05959.1	EGC8001176.1	fimbrial protein BcfE
AEF05959.1	EIJ0498349.1	fimbrial protein BcfE
AEF05959.1	EDN2419729.1	fimbrial protein
AEF05959.1	EAO1922737.1	fimbrial protein BcfE
AEF05959.1	EAM1119819.1	fimbrial protein BcfE
AEF05959.1	HAU3266852.1	fimbrial protein BcfE
AEF05959.1	EAB8267032.1	fimbrial protein BcfE
AEF05959.1	ECW3356267.1	fimbrial protein BcfE
AEF05959.1	HCB5954343.1	fimbrial protein BcfE
AEF05959.1	EHX2266400.1	fimbrial protein BcfE
AEF05959.1	WP_070800903.1	fimbrial protein BcfE
AEF05959.1	EIT2340171.1	fimbrial protein BcfE
AEF05959.1	EIC7594570.1	fimbrial protein BcfE
AEF05959.1	WP_080186140.1	fimbrial protein BcfE
AEF05959.1	EDV7054659.1	fimbrial protein BcfE
AEF05959.1	ECA4740497.1	fimbrial protein BcfE
AEF05959.1	WP_023203788.1	MULTISPECIES: fimbrial protein BcfE
AEF05959.1	CIG05771.1	fimbrial subunit
AEF05959.1	EAZ0273202.1	fimbrial protein BcfE
AEF05959.1	ECL1392424.1	fimbrial protein BcfE
AEF05959.1	EIF9623782.1	fimbrial protein BcfE
AEF05959.1	ECC2667787.1	fimbrial protein BcfE
AEF05959.1	EAO2687355.1	fimbrial protein BcfE
AEF05959.1	EJJ3291974.1	fimbrial protein BcfE
AEF05959.1	EBU4923788.1	fimbrial protein BcfE
AEF05959.1	WP_080093788.1	fimbrial protein BcfE
AEF05959.1	HAC6089066.1	fimbrial protein BcfE
AEF05959.1	EDF9814894.1	fimbrial protein BcfE
AEF05959.1	EDB2080454.1	fimbrial protein BcfE
AEF05959.1	WP_048591756.1	fimbrial protein BcfE
AEF05959.1	EBB8620834.1	fimbrial protein BcfE
AEF05959.1	WP_100514506.1	fimbrial protein BcfE
AEF05959.1	EDY8507562.1	fimbrial protein BcfE
AEF05959.1	WP_079826408.1	fimbrial protein BcfE
AEF05959.1	WP_122040934.1	fimbrial protein BcfE
AEF05959.1	EAN0205888.1	fimbrial protein BcfE
AEF05959.1	EBV7097636.1	fimbrial protein BcfE
AEF05959.1	EBH3647790.1	fimbrial protein BcfE
AEF05959.1	HCK5696881.1	fimbrial protein BcfE
AEF05959.1	EDA8533585.1	fimbrial protein BcfE
AEF05959.1	EDZ8425714.1	fimbrial protein BcfE
AEF05959.1	WP_122132998.1	fimbrial protein BcfE
AEF05959.1	EBQ6222226.1	fimbrial protein
AEF05959.1	EBZ1403253.1	fimbrial protein BcfE
AEF05959.1	ECZ7712331.1	fimbrial protein BcfE
AEF05959.1	EIC8966560.1	fimbrial protein BcfE
AEF05959.1	EAN6686082.1	fimbrial protein BcfE
AEF05959.1	EHN3969912.1	fimbrial protein BcfE
AEF05959.1	EAO9520708.1	fimbrial protein BcfE
AEF05959.1	EBF4667454.1	fimbrial protein BcfE
AEF05959.1	EBQ9073449.1	fimbrial protein
AEF05959.1	EBV8480411.1	fimbrial protein BcfE
AEF05959.1	EBR0248862.1	fimbrial protein
AEF05959.1	EJF0548430.1	fimbrial protein BcfE
AEF05959.1	EAW6579630.1	fimbrial protein BcfE
AEF05959.1	EAR8475821.1	fimbrial protein BcfE
AEF05959.1	EAC0163802.1	fimbrial protein
AEF05959.1	EAV1201935.1	fimbrial protein BcfE
AEF05959.1	EIA2247529.1	fimbrial protein BcfE
AEF05959.1	EFT8695122.1	fimbrial protein BcfE
AEF05959.1	EBK2212695.1	fimbrial protein BcfE
AEF05959.1	EEF7816504.1	fimbrial protein BcfE
AEF05959.1	EAA7324121.1	fimbrial protein BcfE
AEF05959.1	ECY9447890.1	fimbrial protein BcfE
AEF05959.1	EBL9166304.1	fimbrial protein
AEF05960.1	WP_001243232.1	MULTISPECIES: fimbrial protein BcfF
AEF05960.1	WP_080217225.1	fimbrial protein BcfF
AEF05960.1	ECH3165807.1	fimbrial protein BcfF
AEF05960.1	HAF3825337.1	fimbrial protein BcfF
AEF05960.1	HAZ1320637.1	fimbrial protein BcfF
AEF05960.1	EDS3574224.1	fimbrial protein BcfF
AEF05960.1	EIR8880235.1	fimbrial protein BcfF
AEF05960.1	WP_079960242.1	fimbrial protein BcfF
AEF05960.1	WP_135415823.1	fimbrial protein BcfF
AEF05960.1	EDJ0841630.1	fimbrial protein
AEF05960.1	EAR0851981.1	fimbrial protein BcfF
AEF05960.1	HAK8390185.1	fimbrial protein BcfF
AEF05960.1	WP_001243239.1	fimbrial protein BcfF
AEF05960.1	HAC7850460.1	fimbrial protein BcfF
AEF05960.1	EDS6426919.1	fimbrial protein BcfF
AEF05960.1	EGL9599570.1	fimbrial protein BcfF
AEF05960.1	EEP8371765.1	fimbrial protein BcfF
AEF05960.1	EEG8340465.1	fimbrial protein BcfF
AEF05960.1	EEC6210033.1	fimbrial protein BcfF
AEF05960.1	WP_061202053.1	fimbrial protein BcfF
AEF05960.1	EDD0904431.1	fimbrial protein BcfF
AEF05960.1	EEH8870371.1	fimbrial protein BcfF
AEF05960.1	EAA7019872.1	fimbrial protein
AEF05960.1	EDJ9086077.1	fimbrial protein
AEF05960.1	HBI4649055.1	fimbrial protein BcfF
AEF05960.1	WP_192513668.1	fimbrial protein BcfF
AEF05960.1	ECE8838798.1	fimbrial protein BcfF
AEF05960.1	EDF6194281.1	fimbrial protein BcfF
AEF05960.1	EDV0681350.1	fimbrial protein BcfF
AEF05960.1	EBG2694134.1	fimbrial protein BcfF
AEF05960.1	EBX5129189.1	fimbrial protein
AEF05960.1	EDP9479054.1	fimbrial protein BcfF
AEF05960.1	EED7459334.1	fimbrial protein BcfF
AEF05960.1	EAZ6864186.1	fimbrial protein BcfF
AEF05960.1	EBL5544930.1	fimbrial protein BcfF
AEF05960.1	ECG1704074.1	fimbrial protein BcfF
AEF05960.1	EHH9896947.1	fimbrial protein BcfF
AEF05960.1	WP_058811791.1	fimbrial protein BcfF
AEF05960.1	EAO3019073.1	fimbrial protein BcfF
AEF05960.1	EAU6187052.1	fimbrial protein BcfF
AEF05960.1	WP_109183511.1	fimbrial protein BcfF
AEF05960.1	EAA9048935.1	fimbrial protein BcfF
AEF05960.1	EAB3866357.1	fimbrial protein BcfF
AEF05960.1	ECO0439075.1	fimbrial protein BcfF
AEF05960.1	EAN0693876.1	fimbrial protein BcfF
AEF05960.1	EBI4013748.1	fimbrial protein BcfF
AEF05960.1	WP_193734080.1	fimbrial protein BcfF
AEF05960.1	WP_052863998.1	fimbrial protein BcfF
AEF05960.1	EAZ2426286.1	fimbrial protein BcfF
AEF05960.1	EEF8450207.1	fimbrial protein BcfF
AEF05960.1	EAM1274486.1	fimbrial protein BcfF
AEF05960.1	EDT4731463.1	fimbrial protein BcfF
AEF05960.1	WP_001243238.1	fimbrial protein BcfF
AEF05960.1	EBQ5907030.1	fimbrial protein BcfF
AEF05960.1	WP_085341499.1	fimbrial protein BcfF
AEF05960.1	EDT7476108.1	fimbrial protein BcfF
AEF05960.1	WP_061595605.1	fimbrial protein BcfF
AEF05960.1	WP_167810544.1	fimbrial protein BcfF
AEF05960.1	WP_023224135.1	MULTISPECIES: fimbrial protein BcfF
AEF05960.1	HAF8732625.1	fimbrial protein BcfF
AEF05960.1	EBU4682670.1	fimbrial protein BcfF
AEF05960.1	EBI9274692.1	fimbrial protein
AEF05960.1	EBG0607193.1	fimbrial protein BcfF
AEF05960.1	ECF1701789.1	fimbrial protein BcfF
AEF05960.1	EAM3482954.1	fimbrial protein BcfF
AEF05960.1	WP_001243234.1	MULTISPECIES: fimbrial protein BcfF
AEF05960.1	WP_023209312.1	fimbrial protein BcfF
AEF05960.1	ECJ7923755.1	fimbrial protein BcfF
AEF05960.1	EHP6571492.1	fimbrial protein BcfF
AEF05960.1	ECH2253806.1	fimbrial protein BcfF
AEF05960.1	EBT7114669.1	fimbrial protein BcfF
AEF05960.1	EHY0106609.1	fimbrial protein BcfF
AEF05960.1	EAR6584355.1	fimbrial protein BcfF
AEF05960.1	ECG1482124.1	fimbrial protein
AEF05960.1	EBG6369948.1	fimbrial protein BcfF
AEF05960.1	EBG8666985.1	fimbrial protein BcfF
AEF05960.1	EAN9998049.1	fimbrial protein BcfF
AEF05960.1	MJP98146.1	fimbrial protein
AEF05960.1	EJX4923401.1	fimbrial protein BcfF
AEF05960.1	EHF6521151.1	fimbrial protein BcfF
AEF05960.1	EAB3776203.1	fimbrial protein BcfF
AEF05960.1	EAP5492251.1	fimbrial protein BcfF
AEF05960.1	WP_094912378.1	fimbrial protein BcfF
AEF05960.1	EDG9596319.1	fimbrial protein BcfF
AEF05960.1	EAU3529442.1	fimbrial protein BcfF
AEF05960.1	HAC9449234.1	fimbrial protein BcfF
AEF05960.1	EBB3720584.1	fimbrial protein BcfF
AEF05960.1	EHO9456869.1	fimbrial protein BcfF
AEF05960.1	EEO9800376.1	fimbrial protein BcfF
AEF05960.1	EBS7633559.1	fimbrial protein BcfF
AEF05960.1	EBU7766054.1	fimbrial protein
AEF05960.1	EAC0473512.1	fimbrial protein BcfF
AEF05960.1	WP_064001172.1	fimbrial protein BcfF
AEF05960.1	WP_116583573.1	fimbrial protein BcfF
AEF05960.1	EJR7825363.1	fimbrial protein BcfF
AEF05960.1	EID2290567.1	fimbrial protein BcfF
AEF05960.1	EBR5126599.1	fimbrial protein BcfF
AEF05960.1	WP_001243229.1	fimbrial protein BcfF
AEF05960.1	EDD4282301.1	fimbrial protein BcfF
AEF05960.1	EFU2148647.1	fimbrial protein BcfF
AEF05960.1	EEH6950734.1	fimbrial protein BcfF
AEF05960.1	EII0539186.1	fimbrial protein BcfF
AEF05960.1	WP_094964959.1	fimbrial protein BcfF
AEF05960.1	EJU4806195.1	fimbrial protein BcfF
AEF05960.1	EAA7341158.1	fimbrial protein BcfF
AEF05960.1	AZT73770.1	fimbrial protein BcfF
AEF05960.1	EAV4528136.1	fimbrial protein BcfF
AEF05960.1	EFT5117670.1	fimbrial protein BcfF
AEF05960.1	EAT2505816.1	fimbrial protein BcfF
AEF05960.1	WP_001243230.1	fimbrial protein BcfF
AEF05960.1	WP_080214124.1	fimbrial protein BcfF
AEF05960.1	EEH5573353.1	fimbrial protein BcfF
AEF05960.1	EEI3583719.1	fimbrial protein BcfF
AEF05960.1	EDN4230606.1	fimbrial protein BcfF
AEF05960.1	EBM7891552.1	fimbrial protein BcfF
AEF05960.1	WP_140236196.1	fimbrial protein BcfF
AEF05960.1	EAQ8443772.1	fimbrial protein BcfF
AEF05960.1	EDS5035798.1	fimbrial protein BcfF
AEF05960.1	EBP7250516.1	fimbrial protein BcfF
AEF05960.1	EEC0780436.1	fimbrial protein BcfF
AEF05960.1	EBO8099440.1	fimbrial protein BcfF
AEF05960.1	EAC0683098.1	fimbrial protein BcfF
AEF05960.1	WP_054175525.1	fimbrial protein BcfF
AEF05960.1	EIW7597328.1	fimbrial protein BcfF
AEF05960.1	HCM6309184.1	fimbrial protein BcfF
AEF05960.1	EJF4066522.1	fimbrial protein BcfF
AEF05960.1	ECU9884362.1	fimbrial protein BcfF
AEF05960.1	WP_080203247.1	fimbrial protein BcfF
AEF05960.1	EBW5530937.1	fimbrial protein
AEF05960.1	EDY2416820.1	fimbrial protein BcfF
AEF05960.1	EFW5959130.1	fimbrial protein BcfF
AEF05960.1	WP_001243227.1	fimbrial protein BcfF
AEF05960.1	EFQ2876140.1	fimbrial protein BcfF
AEF05960.1	EAY8069554.1	fimbrial protein BcfF
AEF05960.1	EHS1474624.1	fimbrial protein BcfF
AEF05960.1	EAV2773285.1	fimbrial protein BcfF
AEF05960.1	EJL0297358.1	fimbrial protein BcfF
AEF05960.1	WP_106631389.1	fimbrial protein BcfF
AEF05960.1	EAO1902551.1	fimbrial protein BcfF
AEF05960.1	EBL3199225.1	fimbrial protein BcfF
AEF05960.1	EEG0869312.1	fimbrial protein BcfF
AEF05960.1	EBW7490645.1	fimbrial protein
AEF05960.1	HAA0732827.1	fimbrial protein BcfF
AEF05960.1	WP_017466056.1	MULTISPECIES: fimbrial protein BcfF
AEF05960.1	EAM3141234.1	fimbrial protein
AEF05960.1	WP_187790669.1	MULTISPECIES: fimbrial protein BcfF
AEF05960.1	EAN7517243.1	fimbrial protein BcfF
AEF05960.1	EIB0816459.1	fimbrial protein BcfF
AEF05960.1	EBM1965572.1	fimbrial protein
AEF05960.1	EJQ4272253.1	fimbrial protein BcfF
AEF05960.1	EBO4931538.1	fimbrial protein
AEF05960.1	EEF4052006.1	fimbrial protein BcfF
AEF05960.1	EGA3896300.1	fimbrial protein BcfF
AEF05960.1	ECL5363598.1	fimbrial protein BcfF
AEF05960.1	ECK2701422.1	fimbrial protein BcfF
AEF05960.1	EAM7244002.1	fimbrial protein BcfF
AEF05960.1	EFR6125776.1	fimbrial protein BcfF
AEF05960.1	WP_079966163.1	fimbrial protein BcfF
AEF05960.1	EIY4886505.1	fimbrial protein BcfF
AEF05960.1	WP_020898357.1	MULTISPECIES: fimbrial protein BcfF
AEF05960.1	EBA9137593.1	fimbrial protein BcfF
AEF05960.1	WP_183045205.1	fimbrial protein BcfF
AEF05960.1	MBH0738907.1	fimbrial protein BcfF
AEF05960.1	EBX3513538.1	fimbrial protein
AEF05960.1	EJH2696236.1	fimbrial protein BcfF
AEF05960.1	WP_108628398.1	fimbrial protein BcfF
AEF05960.1	WP_183073043.1	fimbrial protein BcfF
AEF05960.1	EAB3024138.1	fimbrial protein BcfF
AEF05960.1	EIO1976307.1	fimbrial protein BcfF
AEF05960.1	EEL9407693.1	fimbrial protein BcfF
AEF05960.1	EAO2260732.1	fimbrial protein BcfF
AEF05960.1	EAM8537403.1	fimbrial protein BcfF
AEF05960.1	EJN0577883.1	fimbrial protein BcfF
AEF05960.1	EHJ1673847.1	fimbrial protein BcfF
AEF05960.1	EBA3202723.1	fimbrial protein BcfF
AEF05960.1	WP_263815863.1	fimbrial protein BcfF
AEF05960.1	EIK2931535.1	fimbrial protein BcfF
AEF05960.1	EBH9599798.1	fimbrial protein BcfF
AEF05960.1	WP_080219151.1	fimbrial protein BcfF
AEF05960.1	EGU2732675.1	fimbrial protein BcfF
AEF05960.1	EAM2970779.1	fimbrial protein BcfF
AEF05960.1	HAG5389033.1	fimbrial protein BcfF
[truncated: 78,258 more rows]

## Sheet: Accession Numbers Table 2
Accession Table 2: NCBI accessions of proteins from vaccine usage related organisms remotely analyzed for negative protein homology to query proteins
Query NCBI Protein Accession Number1	Entrez Query Organism2	Subject NCBI Protein Accession Number	Expect Value
AEF05956.1	Bos taurus	DAA33477.1	1.6
AEF05956.1	Bos taurus	XP_002684864.3	2.2
AEF05956.1	Bos taurus	NP_001092506.1	2.4
AEF05956.1	Bos taurus	NP_001179667.1	4.4
AEF05956.1	Bos taurus	XP_005227173.1	4.5
AEF05957.1	Bos taurus	XP_010807345.1	0.32
AEF05957.1	Bos taurus	XP_003586558.1	0.33
AEF05957.1	Bos taurus	XP_003586559.1	0.33
AEF05957.1	Bos taurus	XP_024853718.1	0.37
AEF05957.1	Bos taurus	DAA17357.1	3.8
AEF05957.1	Bos taurus	NP_001068620.1	4.1
AEF05957.1	Bos taurus	XP_005203488.1	4.6
AEF05957.1	Bos taurus	XP_024833771.1	4.9
AEF05957.1	Bos taurus	XP_024838009.1	5
AEF05957.1	Bos taurus	XP_024845191.1	6.6
AEF05959.1	Bos taurus	NP_001291257.2	2.4
AEF05959.1	Bos taurus	DAA22321.1	2.4
AEF05959.1	Bos taurus	XP_024832829.1	3.8
AEF05959.1	Bos taurus	DAA20908.1	4.4
AEF05959.1	Bos taurus	AAI23546.1	5
AEF05959.1	Bos taurus	NP_001070271.2	5.1
AEF05959.1	Bos taurus	XP_024832828.1	5.2
AEF05960.1	Bos taurus	DAA20828.1	0.48
AEF05960.1	Bos taurus	XP_005217662.1	0.48
AEF05960.1	Bos taurus	NP_777013.1	4.5
AEF05960.1	Bos taurus	DAA25708.1	4.5
AEF05960.1	Bos taurus	ABG67077.1	7.8
AEF05960.1	Bos taurus	AAI11685.1	7.8
AEF05960.1	Bos taurus	XP_015314568.1	8.8
AEF06109.1	Bos taurus	XP_024840135.1	1.3
AEF06109.1	Bos taurus	XP_005224301.1	1.4
AEF06109.1	Bos taurus	NP_001193329.1	1.4
AEF06111.1	Bos taurus	NP_001092542.1	4.9
AEF06111.1	Bos taurus	XP_005221895.1	4.9
AEF06111.1	Bos taurus	XP_024854065.1	6.2
AEF06111.1	Bos taurus	XP_024854079.1	6.3
AEF06111.1	Bos taurus	DAA24672.1	6.4
AEF06111.1	Bos taurus	Q28142.2	6.6
AEF06111.1	Bos taurus	XP_005212608.1	6.6
AEF06111.1	Bos taurus	XP_024854064.1	6.7
AEF06111.1	Bos taurus	NP_776829.1	6.8
AEF06111.1	Bos taurus	XP_024854061.1	6.8
AEF06112.1	Bos taurus	DAA18277.1	7.3
AEF06112.1	Bos taurus	NP_001179045.2	7.3
AEF06112.1	Bos taurus	NP_001070004.1	9.5
AEF06144.1	Bos taurus	AAC95151.1	6.97e-45
AEF06144.1	Bos taurus	AAC95151.1	3
AEF06144.1	Bos taurus	NP_001269011.1	2.96e-44
AEF06144.1	Bos taurus	NP_001269011.1	3.1
AEF06144.1	Bos taurus	XP_024849478.1	3.74e-44
AEF06144.1	Bos taurus	XP_024849478.1	0.025
AEF06144.1	Bos taurus	DAA14692.1	1.32e-43
AEF06144.1	Bos taurus	DAA14692.1	4.2
AEF06144.1	Bos taurus	E1BJW1.1	6.79e-41
AEF06144.1	Bos taurus	NP_001258943.1	2.74e-40
AEF06144.1	Bos taurus	NP_001071424.1	1.03e-35
AEF06144.1	Bos taurus	NP_001071424.1	5.33e-04
AEF06144.1	Bos taurus	DAA28371.1	7.06e-32
AEF06144.1	Bos taurus	DAA28371.1	0.021
AEF06144.1	Bos taurus	XP_024842649.1	2.40e-04
AEF06144.1	Bos taurus	NP_001029783.1	0.012
AEF06159.1	Bos taurus	NP_001040088.1	3.22e-04
AEF06159.1	Bos taurus	NP_001040088.1	0.002
AEF06159.1	Bos taurus	DAA29090.1	0.001
AEF06159.1	Bos taurus	DAA29090.1	0.006
AEF06159.1	Bos taurus	XP_010812426.1	9.3
AEF06160.1	Bos taurus	NP_001193238.1	2.9
AEF06160.1	Bos taurus	NP_001193243.1	5.6
AEF06160.1	Bos taurus	DAA24489.1	6.6
AEF06160.1	Bos taurus	XP_005209572.2	8.4
AEF06160.1	Bos taurus	XP_024850992.1	8.7
AEF06160.1	Bos taurus	XP_024850993.1	9.2
AEF06208.1	Bos taurus	NDP12348.1	4.5
AEF06208.1	Bos taurus	NDP11987.1	4.7
AEF06208.1	Bos taurus	ABG67088.1	6.3
AEF06232.1	Bos taurus	DAA19752.1	6.1
AEF06233.1	Bos taurus	XP_024831619.1	4.4
AEF06233.1	Bos taurus	XP_024831620.1	4.6
AEF06233.1	Bos taurus	XP_024831617.1	5.4
AEF06233.1	Bos taurus	XP_024831618.1	6
AEF06253.1	Bos taurus	ACH56828.1	0.59
AEF06344.1	Bos taurus	XP_002688616.1	3.3
AEF06344.1	Bos taurus	XP_015327401.1	4.4
AEF06344.1	Bos taurus	XP_005221045.2	8.7
AEF06344.1	Bos taurus	XP_003587508.2	8.7
AEF06475.1	Bos taurus	XP_015317010.2	2.2
AEF06475.1	Bos taurus	XP_024844463.1	2.3
AEF06475.1	Bos taurus	XP_024844455.1	2.3
AEF06475.1	Bos taurus	XP_024844461.1	2.3
AEF06475.1	Bos taurus	XP_024844456.1	2.3
AEF06475.1	Bos taurus	DAA13208.1	2.3
AEF06475.1	Bos taurus	XP_024844458.1	2.3
AEF06475.1	Bos taurus	XP_024844457.1	2.3
AEF06475.1	Bos taurus	XP_024844464.1	2.3
AEF06475.1	Bos taurus	XP_024844460.1	2.4
AEF06478.1	Bos taurus	XP_015327095.2	7.8
AEF06478.1	Bos taurus	DAA28754.1	8.7
AEF06514.1	Bos taurus	NDP06257.1	8.9
AEF06556.1	Bos taurus	XP_010811862.2	1.1
AEF06556.1	Bos taurus	XP_024832004.1	1.1
AEF06556.1	Bos taurus	NP_001179466.3	1.1
AEF06556.1	Bos taurus	DAA21006.1	1.1
AEF06556.1	Bos taurus	NP_001069557.1	1.4
AEF06556.1	Bos taurus	AAI33317.1	4.4
AEF06556.1	Bos taurus	XP_024857568.1	4.8
AEF06556.1	Bos taurus	XP_005215745.2	4.9
AEF06556.1	Bos taurus	NP_001192355.1	4.9
AEF06668.1	Bos taurus	XP_015328923.1	0.031
AEF06668.1	Bos taurus	XP_015328923.1	1.9
AEF06668.1	Bos taurus	NP_001179386.1	0.031
AEF06668.1	Bos taurus	NP_001179386.1	1.9
AEF06668.1	Bos taurus	NP_001033186.1	2
AEF06668.1	Bos taurus	NDP11664.1	2.6
AEF06668.1	Bos taurus	DAA32302.1	3.4
AEF06668.1	Bos taurus	NP_001039847.1	3.5
AEF06668.1	Bos taurus	XP_005206201.1	4.2
AEF06668.1	Bos taurus	DAA19507.1	4.4
AEF06668.1	Bos taurus	NP_001091470.1	4.5
AEF06668.1	Bos taurus	NP_001068737.1	4.7
AEF06670.1	Bos taurus	XP_005210622.2	0.013
AEF06670.1	Bos taurus	XP_002689981.4	0.013
AEF06670.1	Bos taurus	DAA26484.1	0.014
AEF06670.1	Bos taurus	XP_010806587.2	0.015
AEF06670.1	Bos taurus	XP_024852103.1	0.019
AEF06670.1	Bos taurus	XP_024836456.1	1.3
AEF06670.1	Bos taurus	XP_024836455.1	1.3
AEF06670.1	Bos taurus	XP_024836458.1	1.4
AEF06670.1	Bos taurus	XP_024836457.1	1.6
AEF06670.1	Bos taurus	XP_024839061.1	1.8
AEF06743.1	Bos taurus	XP_024842696.1	6.24e-08
AEF06743.1	Bos taurus	XP_024842694.1	6.37e-08
AEF06743.1	Bos taurus	XP_024842695.1	6.75e-08
AEF06743.1	Bos taurus	DAA14204.1	8.10e-08
AEF06743.1	Bos taurus	XP_024831067.1	1.16e-07
AEF06743.1	Bos taurus	XP_024831067.1	3.5
AEF06743.1	Bos taurus	NP_001179555.1	1.19e-07
AEF06743.1	Bos taurus	NP_001179555.1	3.6
AEF06743.1	Bos taurus	XP_024831066.1	1.19e-07
AEF06743.1	Bos taurus	XP_024831066.1	3.6
AEF06743.1	Bos taurus	XP_005227526.1	3.80e-05
AEF06743.1	Bos taurus	XP_005227526.1	0.019
AEF06743.1	Bos taurus	NP_001192932.1	6.57e-05
AEF06743.1	Bos taurus	NP_001192932.1	1.9
AEF06743.1	Bos taurus	XP_024831080.1	1.16e-04
AEF06743.1	Bos taurus	XP_024831080.1	0.009
AEF06746.1	Bos taurus	XP_015316946.2	4.2
AEF06746.1	Bos taurus	XP_005227645.2	4.2
AEF06746.1	Bos taurus	XP_024844269.1	4.3
AEF06746.1	Bos taurus	XP_015316945.2	5.2
AEF06746.1	Bos taurus	XP_024844270.1	8.4
AEF06801.1	Bos taurus	NP_001193823.1	0.081
AEF06801.1	Bos taurus	NP_001039889.1	0.19
AEF06801.1	Bos taurus	DAA19619.1	0.21
AEF06801.1	Bos taurus	XP_024834182.1	0.37
AEF06801.1	Bos taurus	DAA19760.1	0.69
AEF06801.1	Bos taurus	NP_001179690.2	1.5
AEF06801.1	Bos taurus	XP_024834993.1	2.2
AEF06801.1	Bos taurus	XP_024842802.1	9.7
AEF06804.1	Bos taurus	NP_001193823.1	0.008
AEF06804.1	Bos taurus	XP_015327031.2	0.08
AEF06804.1	Bos taurus	DAA28815.1	0.081
AEF06804.1	Bos taurus	NP_001179555.1	0.11
AEF06804.1	Bos taurus	XP_024831066.1	0.11
AEF06804.1	Bos taurus	XP_024842696.1	0.13
AEF06804.1	Bos taurus	XP_024842694.1	0.13
AEF06804.1	Bos taurus	XP_024834182.1	0.13
AEF06804.1	Bos taurus	DAA14204.1	0.14
AEF06804.1	Bos taurus	XP_024842695.1	0.15
AEF06836.1	Bos taurus	XP_024855824.1	1.1
AEF06836.1	Bos taurus	XP_002691845.2	1.2
AEF06836.1	Bos taurus	DAA24016.1	1.2
AEF06836.1	Bos taurus	NP_001193586.1	2.2
AEF06836.1	Bos taurus	XP_015313819.2	4.7
AEF06873.1	Bos taurus	XP_005208691.3	1.6
AEF06873.1	Bos taurus	XP_005208690.4	1.6
AEF06873.1	Bos taurus	DAA28111.1	1.8
AEF06873.1	Bos taurus	XP_010805010.1	2
AEF06873.1	Bos taurus	XP_010805011.1	2
AEF06920.1	Bos taurus	1E9P_B	2.30e-11
AEF06920.1	Bos taurus	XP_005227133.1	3.25e-11
AEF06920.1	Bos taurus	1E9O_B	4.96e-11
AEF06920.1	Bos taurus	1CB4_A	5.57e-11
AEF06920.1	Bos taurus	1E9Q_B	5.63e-11
AEF06920.1	Bos taurus	1E9O_A	8.42e-11
AEF06920.1	Bos taurus	1E9Q_A	9.86e-11
AEF06920.1	Bos taurus	1E9P_A	1.13e-10
AEF06920.1	Bos taurus	BAC56512.1	1.45e-10
AEF06920.1	Bos taurus	NP_777040.1	1.99e-10
AEF06947.1	Bos taurus	XP_024849738.1	5.2
AEF06947.1	Bos taurus	XP_024849736.1	7.4
AEF06947.1	Bos taurus	XP_024849737.1	7.8
AEF06947.1	Bos taurus	NP_001179027.1	8.7
AEF06958.1	Bos taurus	XP_024851438.1	0.008
AEF06958.1	Bos taurus	XP_024851437.1	0.01
AEF06958.1	Bos taurus	NP_001029612.1	0.011
AEF06964.1	Bos taurus	NP_001095739.1	2.50e-10
AEF06964.1	Bos taurus	NP_001095739.1	7.88e-05
AEF06964.1	Bos taurus	NP_001095739.1	3.29e-04
AEF06964.1	Bos taurus	NP_001095739.1	0.13
AEF06964.1	Bos taurus	NP_001095739.1	0.99
AEF06964.1	Bos taurus	XP_005210347.1	4.12e-10
AEF06964.1	Bos taurus	XP_005210347.1	1.12e-04
AEF06964.1	Bos taurus	XP_005210347.1	3.24e-04
AEF06964.1	Bos taurus	XP_005210347.1	0.12
AEF06964.1	Bos taurus	XP_005210347.1	0.94
AEF06964.1	Bos taurus	XP_024855953.1	0.091
AEF06964.1	Bos taurus	XP_024855953.1	0.1
AEF06964.1	Bos taurus	XP_024851976.1	0.18
AEF06964.1	Bos taurus	XP_024851977.1	0.2
AEF06964.1	Bos taurus	XP_005210219.1	0.21
AEF06964.1	Bos taurus	XP_024851983.1	0.22
AEF06964.1	Bos taurus	XP_010816156.1	1.6
AEF06964.1	Bos taurus	XP_010816155.1	1.6
AEF06964.1	Bos taurus	XP_002697080.2	1.6
AEF07017.1	Bos taurus	DAA28568.1	1.4
AEF07017.1	Bos taurus	XP_005208138.2	1.4
AEF07017.1	Bos taurus	XP_024848899.1	1.4
AEF07017.1	Bos taurus	XP_024848898.1	1.5
AEF07017.1	Bos taurus	XP_024848895.1	1.6
AEF07017.1	Bos taurus	XP_024848901.1	1.6
AEF07017.1	Bos taurus	XP_015327167.2	1.6
AEF07017.1	Bos taurus	XP_024848900.1	1.6
AEF07017.1	Bos taurus	NP_001179110.2	1.7
AEF07017.1	Bos taurus	XP_024848894.1	1.8
AEF07117.1	Bos taurus	NP_001094597.1	0.003
AEF07117.1	Bos taurus	NP_001179661.1	0.24
AEF07117.1	Bos taurus	NP_001179661.1	5.8
AEF07117.1	Bos taurus	XP_024854836.1	0.26
AEF07117.1	Bos taurus	XP_024854836.1	6.1
AEF07117.1	Bos taurus	XP_005217702.1	8.1
AEF07120.1	Bos taurus	DAA24086.1	0.47
AEF07120.1	Bos taurus	XP_024855493.1	0.47
AEF07120.1	Bos taurus	XP_024855492.1	0.47
AEF07120.1	Bos taurus	XP_024855491.1	0.47
AEF07120.1	Bos taurus	XP_024855490.1	0.47
AEF07157.1	Bos taurus	XP_015330865.1	0.77
AEF07157.1	Bos taurus	XP_005217604.1	9.2
AEF07157.1	Bos taurus	XP_005217602.1	9.2
AEF07339.1	Bos taurus	NDP04998.1	3.4
AEF07339.1	Bos taurus	NDP18917.1	8.3
AEF07457.1	Bos taurus	XP_005218531.1	6.7
AEF07457.1	Bos taurus	NP_001033120.1	6.8
AEF07604.1	Bos taurus	NP_001179606.1	8.7
AEF07866.1	Bos taurus	XP_015314214.1	0.57
AEF07866.1	Bos taurus	NDP18917.1	8.1
AEF08116.1	Bos taurus	AAI22746.1	3.3
AEF08116.1	Bos taurus	XP_024846744.1	9.7
AEF08270.1	Bos taurus	DAA24512.1	2.9
AEF08270.1	Bos taurus	XP_024855311.1	3
AEF08270.1	Bos taurus	XP_024855309.1	3.2
AEF08270.1	Bos taurus	AAI05206.1	9.9
AEF08271.1	Bos taurus	XP_010801294.1	0.98
AEF08271.1	Bos taurus	XP_010801293.1	0.99
AEF08271.1	Bos taurus	NP_001096579.1	1.1
AEF08271.1	Bos taurus	XP_005203881.1	1.2
AEF08271.1	Bos taurus	XP_024839930.1	1.2
AEF08271.1	Bos taurus	XP_024839932.1	1.3
AEF08271.1	Bos taurus	XP_005203884.1	1.5
AEF08271.1	Bos taurus	NP_001107662.1	3.1
AEF08271.1	Bos taurus	DAA14496.1	3.6
AEF08271.1	Bos taurus	XP_024841977.1	6.4
AEF08307.1	Bos taurus	XP_024845203.1	3.7
AEF08307.1	Bos taurus	XP_010801487.1	3.8
AEF08307.1	Bos taurus	XP_010815026.1	4.2
AEF08307.1	Bos taurus	XP_024837106.1	4.4
AEF08307.1	Bos taurus	NP_001073772.1	5.2
AEF08307.1	Bos taurus	XP_010815025.1	6.1
AEF08307.1	Bos taurus	XP_024835540.1	6.7
AEF08307.1	Bos taurus	XP_024835541.1	6.8
AEF08307.1	Bos taurus	NP_001068676.1	7
AEF08307.1	Bos taurus	XP_024835539.1	7
AEF08399.1	Bos taurus	DAA26840.1	0.63
AEF08399.1	Bos taurus	XP_015328024.2	0.71
AEF08399.1	Bos taurus	XP_024840374.1	1.5
AEF08399.1	Bos taurus	XP_024840372.1	1.5
AEF08399.1	Bos taurus	XP_024840373.1	1.5
AEF08399.1	Bos taurus	DAA15893.1	1.6
AEF08399.1	Bos taurus	XP_024855786.1	4.3
AEF08399.1	Bos taurus	XP_024855783.1	4.5
AEF08399.1	Bos taurus	XP_024855784.1	4.6
AEF08399.1	Bos taurus	XP_024855782.1	4.6
AEF08425.1	Bos taurus	XP_024834023.1	0.31
AEF08592.1	Bos taurus	XP_002693220.1	0.29
AEF08592.1	Bos taurus	NP_001030222.1	2
AEF08636.1	Bos taurus	XP_024852941.1	0.14
AEF08636.1	Bos taurus	XP_002693043.1	0.92
AEF08636.1	Bos taurus	NP_776487.1	3.9
AEF08636.1	Bos taurus	AAI51550.1	3.9
AEF08636.1	Bos taurus	XP_024835292.1	4.5
AEF08636.1	Bos taurus	XP_005220236.2	4.9
AEF08636.1	Bos taurus	AAN17325.1	6.5
AEF08671.1	Bos taurus	XP_002696194.3	4.4
AEF08671.1	Bos taurus	XP_010814943.1	4.8
AEF08671.1	Bos taurus	XP_015314495.2	4.9
AEF08671.1	Bos taurus	XP_024836862.1	5.3
AEF08880.1	Bos taurus	XP_002694753.1	7.7
AEF08888.1	Bos taurus	DAA28802.1	1.4
AEF08888.1	Bos taurus	XP_005207827.1	1.4
AEF08888.1	Bos taurus	XP_005207826.1	1.4
AEF08888.1	Bos taurus	XP_024846803.1	4.1
AEF09288.1	Bos taurus	NP_001071437.1	1.60e-21
AEF09288.1	Bos taurus	1FKK_A	1.83e-21
AEF09288.1	Bos taurus	AAI02339.1	1.83e-21
AEF09288.1	Bos taurus	NP_001030533.1	1.84e-21
AEF09288.1	Bos taurus	1TCO_C	3.06e-21
AEF09288.1	Bos taurus	NP_001091627.1	3.63e-20
AEF09288.1	Bos taurus	AAI18470.1	3.99e-20
AEF09288.1	Bos taurus	DAA31554.1	7.74e-20
AEF09288.1	Bos taurus	NP_001179791.1	5.11e-19
AEF09288.1	Bos taurus	XP_024839424.1	6.10e-19
AEF09472.1	Bos taurus	XP_024832788.1	1.1
AEF09472.1	Bos taurus	NP_001098900.1	3.7
AEF09473.1	Bos taurus	DAA32835.1	4
AEF09473.1	Bos taurus	XP_024835650.1	4
AEF09473.1	Bos taurus	XP_024835653.1	4
AEF09473.1	Bos taurus	XP_024835659.1	4
AEF09473.1	Bos taurus	XP_024835655.1	4
AEF09473.1	Bos taurus	XP_024852890.1	4.3
AEF09473.1	Bos taurus	XP_024852895.1	7
AEF09474.1	Bos taurus	DAA25985.1	1.2
AEF09474.1	Bos taurus	XP_010799030.1	1.2
AEF09474.1	Bos taurus	XP_024852895.1	1.2
AEF09474.1	Bos taurus	XP_024852894.1	1.2
AEF09474.1	Bos taurus	NDP10625.1	7.5
AEF09474.1	Bos taurus	NDP19273.1	7.9
AEF09474.1	Bos taurus	NDP07920.1	8
AEF09474.1	Bos taurus	NDP06023.1	8.3
AEF09474.1	Bos taurus	NDP09079.1	8.9
AEF09474.1	Bos taurus	NDP10058.1	9
AEF09588.1	Bos taurus	NP_001029473.1	0.049
AEF09588.1	Bos taurus	XP_024831651.1	3.7
AEF09588.1	Bos taurus	DAA32835.1	8.9
AEF09588.1	Bos taurus	XP_024835650.1	8.9
AEF09689.1	Bos taurus	AEM05838.1	4.4
AEF09689.1	Bos taurus	DAA30895.1	9.2
AEF10030.1	Bos taurus	XP_015330755.2	4.2
AEF10030.1	Bos taurus	NP_001192552.1	4.2
AEF10030.1	Bos taurus	XP_024831911.1	4.2
AEF10030.1	Bos taurus	NP_001185821.1	7.3
AEF10041.1	Bos taurus	NP_001035688.1	0.62
AEF10041.1	Bos taurus	AAI14901.1	0.76
AEF10041.1	Bos taurus	XP_005220976.1	2.5
AEF10041.1	Bos taurus	NP_001069790.1	2.5
AEF10041.1	Bos taurus	XP_024836175.1	2.6
AEF10041.1	Bos taurus	XP_005220978.1	2.6
AEF10041.1	Bos taurus	XP_024836177.1	2.7
AEF10041.1	Bos taurus	XP_024836176.1	2.8
AEF10041.1	Bos taurus	XP_005220980.1	2.8
AEF10041.1	Bos taurus	XP_005220979.1	2.8
AEF10383.1	Bos taurus	XP_010808041.2	1.8
AEF10383.1	Bos taurus	XP_024854558.1	1.8
AEF10383.1	Bos taurus	XP_024854556.1	1.8
AEF10383.1	Bos taurus	NP_001193071.2	1.9
AEF10383.1	Bos taurus	DAA24956.1	1.9
AEF10383.1	Bos taurus	XP_010808040.2	1.9
AEF10383.1	Bos taurus	XP_024854557.1	1.9
AEF10383.1	Bos taurus	DAA24957.1	2
AEF10383.1	Bos taurus	XP_024854560.1	2
AEF10383.1	Bos taurus	XP_024854559.1	2.1
AEF06168.1	Bos taurus	DAA33846.1	1.79e-04
AEF06168.1	Bos taurus	XP_002686526.1	1.6
AEF06168.1	Bos taurus	XP_024835659.1	7.3
AEF06168.1	Bos taurus	XP_024835655.1	7.3
AEF06168.1	Bos taurus	XP_024835653.1	7.7
AEF06168.1	Bos taurus	DAA32835.1	8.4
AEF06168.1	Bos taurus	XP_024835650.1	9.5
AEF06269.1	Bos taurus	NP_001019726.1	2.6
AEF06269.1	Bos taurus	AAI48980.1	2.6
AEF06269.1	Bos taurus	XP_005208724.1	3.1
AEF06269.1	Bos taurus	XP_015327445.1	3.2
AEF06269.1	Bos taurus	XP_005208725.1	3.2
AEF06269.1	Bos taurus	XP_015327444.1	3.2
AEF06269.1	Bos taurus	XP_015327447.1	3.3
AEF06269.1	Bos taurus	XP_015327446.1	3.3
AEF06269.1	Bos taurus	XP_005208728.1	3.3
AEF06269.1	Bos taurus	XP_005208727.1	3.3
AEF06271.1	Bos taurus	5HNW_B	3.4
AEF06271.1	Bos taurus	Q6B856.2	3.6
AEF06271.1	Bos taurus	5Z4U_B	3.6
AEF06271.1	Bos taurus	5ZXH_B	3.6
AEF06271.1	Bos taurus	6REV_B	3.6
AEF06271.1	Bos taurus	6OJQ_B	3.7
AEF06271.1	Bos taurus	4UY0_B	3.7
AEF06271.1	Bos taurus	1TVK_B	3.7
AEF06271.1	Bos taurus	NP_001003900.1	3.8
AEF06271.1	Bos taurus	3DU7_B	3.8
AEF06277.1	Bos taurus	NP_001029545.1	5
AEF06277.1	Bos taurus	XP_005226022.1	5
AEF06441.1	Bos taurus	NDP18057.1	1.3
AEF06441.1	Bos taurus	NDP13870.1	4
AEF06441.1	Bos taurus	NDP18144.1	4.7
AEF06480.1	Bos taurus	XP_024835659.1	0.82
AEF06480.1	Bos taurus	XP_024835655.1	0.82
AEF06480.1	Bos taurus	XP_024835653.1	0.83
AEF06480.1	Bos taurus	DAA32835.1	0.83
AEF06480.1	Bos taurus	XP_024835650.1	0.83
AEF06480.1	Bos taurus	XP_024836646.1	2.4
AEF06480.1	Bos taurus	XP_024836647.1	2.9
AEF06480.1	Bos taurus	CAJ31249.1	5.1
AEF06480.1	Bos taurus	AKE14287.1	5.1
AEF06480.1	Bos taurus	Q2UVX4.2	5.1
AEF06853.1	Bos taurus	NP_001030205.1	9.73e-12
AEF06853.1	Bos taurus	XP_005204593.1	1.01e-11
AEF06853.1	Bos taurus	XP_024842141.1	1.19e-11
AEF06853.1	Bos taurus	XP_024845349.1	0.022
AEF06853.1	Bos taurus	NP_001179857.1	0.043
AEF06853.1	Bos taurus	XP_024845348.1	0.063
AEF06853.1	Bos taurus	DAA20417.1	0.79
AEF06853.1	Bos taurus	NP_001070504.1	0.81
AEF06919.1	Bos taurus	XP_024833286.1	3.6
AEF07006.1	Bos taurus	AXP98869.1	2
AEF07006.1	Bos taurus	XP_010805181.1	2
AEF07006.1	Bos taurus	NP_001180063.2	2.6
AEF07006.1	Bos taurus	XP_010819215.1	2.7
AEF07006.1	Bos taurus	DAA13936.1	2.7
AEF07006.1	Bos taurus	XP_010820364.1	4.5
AEF07006.1	Bos taurus	NP_001030572.1	5
AEF07006.1	Bos taurus	DAA12758.1	5
AEF07198.1	Bos taurus	XP_002698082.1	7.4
AEF07299.1	Bos taurus	AAC60522.2	7.71e-49
AEF07299.1	Bos taurus	NP_963285.2	2.36e-48
AEF07299.1	Bos taurus	AAX09005.1	2.81e-48
AEF07299.1	Bos taurus	AAA30655.1	3.48e-48
AEF07299.1	Bos taurus	QZS37419.1	1.52e-46
AEF07299.1	Bos taurus	BAC56526.1	2.00e-31
AEF07299.1	Bos taurus	DAA25967.1	0.12
AEF07299.1	Bos taurus	XP_005227555.1	0.93
AEF07299.1	Bos taurus	NP_001179913.1	0.93
AEF07299.1	Bos taurus	DAA13405.1	3.3
AEF07365.1	Bos taurus	NP_001014952.1	0.31
AEF07365.1	Bos taurus	XP_024846500.1	5.1
AEF07365.1	Bos taurus	XP_024846499.1	5.1
AEF07365.1	Bos taurus	NP_001076922.1	5.1
AEF07365.1	Bos taurus	DAA15806.1	8.5
AEF07365.1	Bos taurus	NP_001029692.1	9
AEF07365.1	Bos taurus	XP_024840036.1	9.3
AEF07875.1	Bos taurus	XP_005202744.1	2.7
AEF07875.1	Bos taurus	XP_003585805.2	2.9
AEF07875.1	Bos taurus	XP_005202748.1	3
AEF07926.1	Bos taurus	NP_001193837.1	4.56e-11
AEF07926.1	Bos taurus	NP_001193837.1	2.70e-07
AEF07926.1	Bos taurus	NP_001193837.1	0.001
AEF07926.1	Bos taurus	NP_001193837.1	0.026
AEF07926.1	Bos taurus	NP_001193837.1	0.64
AEF07926.1	Bos taurus	NP_001193837.1	3.6
AEF07926.1	Bos taurus	XP_024857126.1	3.38e-09
AEF07926.1	Bos taurus	XP_024857126.1	1.08e-06
AEF07926.1	Bos taurus	XP_024857126.1	0.005
AEF07926.1	Bos taurus	XP_024857126.1	0.13
AEF07926.1	Bos taurus	XP_024857126.1	2.6
AEF07926.1	Bos taurus	DAA23662.1	3.82e-09
AEF07926.1	Bos taurus	DAA23662.1	1.41e-06
AEF07926.1	Bos taurus	DAA23662.1	0.007
AEF07926.1	Bos taurus	DAA23662.1	0.13
AEF07926.1	Bos taurus	DAA23662.1	3.5
AEF07926.1	Bos taurus	NP_001193485.1	0.001
AEF07926.1	Bos taurus	DAA28785.1	0.001
AEF07926.1	Bos taurus	XP_024849076.1	0.001
AEF07926.1	Bos taurus	XP_024842196.1	0.004
AEF07926.1	Bos taurus	AAI19853.1	0.011
AEF07926.1	Bos taurus	AAI19853.1	0.029
AEF07926.1	Bos taurus	AAI19853.1	0.31
AEF07926.1	Bos taurus	AAI19853.1	0.52
AEF07926.1	Bos taurus	NP_001019706.1	0.025
AEF07926.1	Bos taurus	NP_001019706.1	0.035
AEF07926.1	Bos taurus	NP_001019706.1	0.4
AEF07926.1	Bos taurus	NP_001019706.1	0.44
AEF07926.1	Bos taurus	XP_024849947.1	0.026
AEF07926.1	Bos taurus	XP_024849947.1	0.037
AEF07926.1	Bos taurus	XP_024849947.1	0.42
AEF07926.1	Bos taurus	XP_024849947.1	0.46
AEF08065.1	Bos taurus	NP_001377489.1	2.1
AEF08065.1	Bos taurus	XP_002697097.2	10
AEF08065.1	Bos taurus	DAA17035.1	10
AEF08066.1	Bos taurus	NDP04887.1	5.3
AEF08173.1	Bos taurus	NP_872596.1	2.6
AEF08173.1	Bos taurus	XP_010810940.1	3.2
AEF08173.1	Bos taurus	NP_001077257.1	6.5
AEF08173.1	Bos taurus	NDP05404.1	7.1
AEF08431.1	Bos taurus	XP_005224773.2	0.17
AEF08431.1	Bos taurus	XP_024840488.1	0.24
AEF08431.1	Bos taurus	DAA15489.1	0.53
AEF08431.1	Bos taurus	NP_001258923.1	0.53
AEF08431.1	Bos taurus	E1BP74.2	0.53
AEF08431.1	Bos taurus	XP_010817591.2	0.79
AEF08431.1	Bos taurus	DAA32684.1	4
AEF08431.1	Bos taurus	NP_001095578.1	4.1
AEF08883.1	Bos taurus	XP_005207168.1	1
AEF08883.1	Bos taurus	XP_005207167.1	1
AEF08883.1	Bos taurus	XP_024847218.1	1
AEF08883.1	Bos taurus	NP_001178985.2	1
AEF08915.1	Bos taurus	NP_001103563.1	0.007
AEF08915.1	Bos taurus	DAA26377.1	0.008
AEF08915.1	Bos taurus	XP_010806678.1	0.01
AEF09385.1	Bos taurus	DAA20447.1	1.45e-81
AEF09385.1	Bos taurus	NP_001193143.2	1.94e-81
AEF09385.1	Bos taurus	XP_024856584.1	5.51e-55
AEF09385.1	Bos taurus	ABG66985.1	3.11e-54
AEF09385.1	Bos taurus	NP_001069869.1	4.06e-54
AEF09385.1	Bos taurus	XP_005218331.1	5.45e-50
AEF09385.1	Bos taurus	XP_024856585.1	1.03e-49
AEF09385.1	Bos taurus	NP_001178148.1	1.09e-49
AEF09385.1	Bos taurus	DAA20445.1	1.76e-49
AEF09385.1	Bos taurus	XP_015329670.1	5.84e-49
AEF10148.1	Bos taurus	DAA14204.1	0.087
AEF10148.1	Bos taurus	XP_024842695.1	0.088
AEF10148.1	Bos taurus	XP_024831067.1	0.096
AEF10148.1	Bos taurus	XP_024831066.1	0.097
AEF10148.1	Bos taurus	XP_024842694.1	0.098
AEF10148.1	Bos taurus	NP_001179555.1	0.099
AEF10148.1	Bos taurus	XP_024842696.1	0.099
AEF10148.1	Bos taurus	XP_024834182.1	0.37
AEF10148.1	Bos taurus	DAA19619.1	0.38
AEF10148.1	Bos taurus	NP_001039889.1	0.38
AEF10232.1	Bos taurus	AAA17565.1	2.8
AEF10232.1	Bos taurus	NP_776821.3	2.8
AEF10232.1	Bos taurus	XP_005220122.1	3.1
AEF10232.1	Bos taurus	XP_005220121.1	3.1
AEF10232.1	Bos taurus	CAA80476.1	4.9
AEF10232.1	Bos taurus	XP_024853991.1	7.8
AEF10334.1	Bos taurus	XP_002685197.2	5.4
AEF10334.1	Bos taurus	DAA32967.1	5.6
AEF10334.1	Bos taurus	XP_005202180.2	5.6
AEF10334.1	Bos taurus	XP_005213601.1	8.9
AEF10334.1	Bos taurus	XP_005213603.1	9.3
AEF10334.1	Bos taurus	AFO11020.1	9.3
AEF10334.1	Bos taurus	XP_005213605.1	9.3
AEF10334.1	Bos taurus	XP_005213602.1	9.4
AEF10334.1	Bos taurus	XP_005213604.1	9.7
AEF10361.1	Bos taurus	DAA24089.1	0.36
AEF10361.1	Bos taurus	DAA17826.1	4.8
AEF10364.1	Bos taurus	XP_024850387.1	3.2
AEF10364.1	Bos taurus	XP_024850386.1	3.3
AEF10364.1	Bos taurus	XP_024850385.1	3.3
AEF10382.1	Bos taurus	NP_001107217.2	0.27
AEF10382.1	Bos taurus	DAA33060.1	0.27
AEF10382.1	Bos taurus	NDP08122.1	2.8
AEF10382.1	Bos taurus	NDP10023.1	2.8
AEF05956.1	Gallus gallus	CAG31895.1	0.59
AEF05956.1	Gallus gallus	NP_001025985.2	0.6
AEF05957.1	Gallus gallus	XP_040556964.1	0.054
AEF05957.1	Gallus gallus	XP_040556948.1	0.06
AEF05957.1	Gallus gallus	XP_040556944.1	0.061
AEF05957.1	Gallus gallus	XP_040556945.1	0.062
AEF05957.1	Gallus gallus	XP_040556943.1	0.062
AEF05957.1	Gallus gallus	XP_015142898.2	0.064
AEF05957.1	Gallus gallus	XP_040556947.1	0.066
AEF05957.1	Gallus gallus	XP_040556946.1	0.067
AEF05957.1	Gallus gallus	XP_040556951.1	0.076
AEF05957.1	Gallus gallus	XP_040556952.1	0.081
AEF05959.1	Gallus gallus	XP_015151158.3	4.8
AEF05959.1	Gallus gallus	NP_990222.1	4.8
AEF05960.1	Gallus gallus	XP_040543700.1	1.6
AEF05960.1	Gallus gallus	XP_046755260.1	6.6
AEF05960.1	Gallus gallus	XP_046755262.1	7.1
AEF05960.1	Gallus gallus	XP_015134478.3	7.8
AEF05960.1	Gallus gallus	XP_015134481.3	7.9
AEF05960.1	Gallus gallus	XP_015134479.3	7.9
AEF06110.1	Gallus gallus	XP_004938099.2	8
AEF06112.1	Gallus gallus	XP_046762450.1	7.4
AEF06112.1	Gallus gallus	XP_025008768.2	7.4
AEF06112.1	Gallus gallus	XP_046762449.1	7.4
AEF06112.1	Gallus gallus	XP_025008707.2	7.4
AEF06112.1	Gallus gallus	XP_040560809.1	7.5
AEF06112.1	Gallus gallus	NP_001239069.2	7.5
AEF06112.1	Gallus gallus	XP_046762453.1	7.5
AEF06112.1	Gallus gallus	XP_015133046.2	7.5
AEF06112.1	Gallus gallus	XP_015133030.2	7.5
AEF06112.1	Gallus gallus	XP_046762454.1	7.5
AEF06126.1	Gallus gallus	XP_046754195.1	1.7
AEF06126.1	Gallus gallus	XP_040534213.1	1.9
AEF06126.1	Gallus gallus	XP_015139381.2	3.1
AEF06126.1	Gallus gallus	XP_040523228.1	3.1
AEF06144.1	Gallus gallus	XP_015144381.1	1.27e-42
AEF06144.1	Gallus gallus	XP_015144381.1	1.8
AEF06144.1	Gallus gallus	XP_015141331.1	2.21e-42
AEF06144.1	Gallus gallus	XP_015141331.1	0.13
AEF06144.1	Gallus gallus	XP_040525664.1	5.45e-37
AEF06144.1	Gallus gallus	XP_040525664.1	0.47
AEF06144.1	Gallus gallus	XP_015156780.2	8.40e-33
AEF06144.1	Gallus gallus	XP_015156780.2	0.5
AEF06144.1	Gallus gallus	AAB61899.1	3.11e-32
AEF06144.1	Gallus gallus	AAB61899.1	0.57
AEF06144.1	Gallus gallus	XP_015156781.2	2.07e-28
AEF06144.1	Gallus gallus	XP_015156781.2	0.49
AEF06144.1	Gallus gallus	XP_025006783.1	0.11
AEF06144.1	Gallus gallus	XP_025006782.1	0.12
AEF06144.1	Gallus gallus	XP_046756443.1	0.15
AEF06144.1	Gallus gallus	XP_040508101.1	0.15
AEF06159.1	Gallus gallus	NP_001264959.1	7.88e-10
AEF06159.1	Gallus gallus	XP_046763673.1	8.92e-10
AEF06159.1	Gallus gallus	XP_046763674.1	1.15e-08
AEF06159.1	Gallus gallus	XP_046763675.1	5.99e-08
AEF06160.1	Gallus gallus	XP_015132624.2	0.069
AEF06160.1	Gallus gallus	XP_040561752.1	0.07
AEF06160.1	Gallus gallus	XP_040535737.1	0.071
AEF06160.1	Gallus gallus	XP_015132623.2	0.071
AEF06160.1	Gallus gallus	XP_015132622.2	0.071
AEF06160.1	Gallus gallus	XP_040535736.1	0.072
AEF06160.1	Gallus gallus	XP_040535735.1	0.073
AEF06160.1	Gallus gallus	XP_040535734.1	0.076
AEF06160.1	Gallus gallus	XP_040530791.1	0.96
AEF06160.1	Gallus gallus	XP_421787.4	0.96
AEF06208.1	Gallus gallus	NP_001186347.3	0.007
AEF06208.1	Gallus gallus	NP_001384145.1	2
AEF06233.1	Gallus gallus	XP_040557864.1	6.7
AEF06233.1	Gallus gallus	XP_040529845.1	9.6
AEF06253.1	Gallus gallus	XP_004944844.3	6.5
AEF06295.1	Gallus gallus	XP_001235182.3	4.6
AEF06295.1	Gallus gallus	XP_040547753.1	4.8
AEF06478.1	Gallus gallus	XP_040541539.1	3.8
AEF06478.1	Gallus gallus	XP_024997221.2	3.8
AEF06478.1	Gallus gallus	XP_040541538.1	4.8
AEF06478.1	Gallus gallus	XP_040505371.1	5.1
AEF06556.1	Gallus gallus	XP_046766147.1	0.82
AEF06556.1	Gallus gallus	Q98T89.1	0.86
AEF06556.1	Gallus gallus	NP_989529.2	1
AEF06556.1	Gallus gallus	XP_046773167.1	1
AEF06556.1	Gallus gallus	XP_040519399.1	7.7
AEF06556.1	Gallus gallus	XP_418337.3	7.7
AEF06556.1	Gallus gallus	XP_046785103.1	9.8
AEF06556.1	Gallus gallus	XP_040541571.1	9.8
AEF06556.1	Gallus gallus	XP_024997192.3	10
AEF06668.1	Gallus gallus	XP_004940182.1	0.048
AEF06668.1	Gallus gallus	XP_004940182.1	1.1
AEF06668.1	Gallus gallus	XP_040522942.1	0.055
AEF06668.1	Gallus gallus	XP_040522942.1	1.3
AEF06668.1	Gallus gallus	CAG31854.1	2.8
AEF06668.1	Gallus gallus	XP_046761529.1	3.9
AEF06668.1	Gallus gallus	XP_046761528.1	4.1
AEF06668.1	Gallus gallus	XP_040512002.1	4.1
AEF06668.1	Gallus gallus	XP_046761530.1	4.3
AEF06668.1	Gallus gallus	XP_040511999.1	4.4
AEF06668.1	Gallus gallus	XP_046761526.1	4.4
AEF06668.1	Gallus gallus	XP_046761525.1	4.5
AEF06670.1	Gallus gallus	NP_001165242.2	3
AEF06670.1	Gallus gallus	XP_040507768.1	4.8
AEF06670.1	Gallus gallus	XP_015153385.3	4.8
AEF06670.1	Gallus gallus	XP_015153386.3	4.9
AEF06670.1	Gallus gallus	XP_040545837.1	5.1
AEF06670.1	Gallus gallus	XP_040545832.1	5.1
AEF06670.1	Gallus gallus	XP_040545833.1	5.2
AEF06670.1	Gallus gallus	XP_015153387.3	5.7
AEF06670.1	Gallus gallus	XP_046759560.1	5.8
AEF06670.1	Gallus gallus	XP_040545830.1	5.9
AEF06743.1	Gallus gallus	XP_040558865.1	1.06e-07
AEF06743.1	Gallus gallus	XP_025007441.1	1.09e-07
AEF06743.1	Gallus gallus	XP_025007439.1	1.11e-07
AEF06743.1	Gallus gallus	XP_040530872.1	1.18e-07
AEF06743.1	Gallus gallus	XP_040530870.1	1.27e-07
AEF06743.1	Gallus gallus	XP_015143515.1	1.27e-07
AEF06743.1	Gallus gallus	XP_004942001.1	1.40e-07
AEF06743.1	Gallus gallus	XP_015153663.2	3.91e-07
AEF06743.1	Gallus gallus	XP_015153663.2	3.2
AEF06743.1	Gallus gallus	XP_015150952.2	8.49e-05
AEF06743.1	Gallus gallus	XP_015150951.2	8.49e-05
AEF06746.1	Gallus gallus	XP_040531747.1	8.5
AEF06746.1	Gallus gallus	XP_040559598.1	8.5
AEF06746.1	Gallus gallus	XP_040531745.1	8.6
AEF06746.1	Gallus gallus	XP_004942731.2	8.6
AEF06746.1	Gallus gallus	XP_046777747.1	8.6
AEF06746.1	Gallus gallus	XP_046799805.1	8.6
AEF06746.1	Gallus gallus	XP_040531741.1	8.6
AEF06746.1	Gallus gallus	XP_004942728.2	8.6
AEF06801.1	Gallus gallus	XP_015150950.2	0.012
AEF06801.1	Gallus gallus	XP_015150952.2	0.013
AEF06801.1	Gallus gallus	XP_015150951.2	0.013
AEF06801.1	Gallus gallus	XP_040516439.1	2
AEF06801.1	Gallus gallus	NP_001186316.1	3
AEF06801.1	Gallus gallus	XP_040532989.1	4.3
AEF06801.1	Gallus gallus	XP_015137938.3	4.6
AEF06801.1	Gallus gallus	XP_040532969.1	5.5
AEF06801.1	Gallus gallus	XP_025011028.2	9.8
AEF06804.1	Gallus gallus	XP_015150952.2	0.007
AEF06804.1	Gallus gallus	XP_015150951.2	0.007
AEF06804.1	Gallus gallus	XP_015150950.2	0.007
AEF06804.1	Gallus gallus	XP_040525882.1	0.034
AEF06804.1	Gallus gallus	XP_046772960.1	0.037
AEF06804.1	Gallus gallus	XP_046772959.1	0.041
AEF06804.1	Gallus gallus	XP_040525881.1	0.042
AEF06804.1	Gallus gallus	XP_015132086.1	0.046
AEF06804.1	Gallus gallus	XP_040558865.1	0.16
AEF06804.1	Gallus gallus	XP_040530872.1	0.17
AEF06873.1	Gallus gallus	XP_040531841.1	8.7
AEF06920.1	Gallus gallus	XP_015128500.4	7.65e-08
AEF06920.1	Gallus gallus	XP_040550204.2	8.68e-08
AEF06920.1	Gallus gallus	P80566.3	1.18e-05
AEF06920.1	Gallus gallus	NP_990395.2	1.33e-05
AEF06958.1	Gallus gallus	XP_024998676.2	0.002
AEF06958.1	Gallus gallus	XP_040545233.1	0.002
AEF06958.1	Gallus gallus	XP_046765869.1	1.5
AEF06958.1	Gallus gallus	XP_046769475.1	1.5
AEF06958.1	Gallus gallus	XP_040516326.1	1.9
AEF06958.1	Gallus gallus	XP_040563150.1	2.2
AEF06958.1	Gallus gallus	XP_025005126.2	5.2
AEF06958.1	Gallus gallus	XP_040522470.1	5.5
AEF06964.1	Gallus gallus	NP_001012857.1	6.26e-10
AEF06964.1	Gallus gallus	NP_001012857.1	7.46e-05
AEF06964.1	Gallus gallus	NP_001012857.1	1.41e-04
AEF06964.1	Gallus gallus	NP_001012857.1	1.2
AEF06964.1	Gallus gallus	NP_001012857.1	6.8
AEF06964.1	Gallus gallus	XP_040550816.1	0.47
AEF06964.1	Gallus gallus	XP_040550814.1	0.51
AEF06964.1	Gallus gallus	XP_040550814.1	0.57
AEF06964.1	Gallus gallus	XP_046761019.1	0.62
AEF06964.1	Gallus gallus	XP_046761018.1	0.64
AEF06964.1	Gallus gallus	XP_046761020.1	0.65
AEF06964.1	Gallus gallus	XP_046761023.1	0.92
AEF06964.1	Gallus gallus	XP_040510995.1	0.95
AEF06964.1	Gallus gallus	XP_040503575.1	2.6
AEF06964.1	Gallus gallus	XP_040539754.1	2.6
AEF07017.1	Gallus gallus	XP_004941238.1	0.13
AEF07017.1	Gallus gallus	XP_046773008.1	0.13
AEF07017.1	Gallus gallus	XP_040526790.1	0.13
AEF07017.1	Gallus gallus	XP_040506771.1	4
AEF07017.1	Gallus gallus	XP_040543841.1	4.1
AEF07078.1	Gallus gallus	XP_040523613.1	1.8
AEF07078.1	Gallus gallus	XP_040554479.1	1.8
AEF07078.1	Gallus gallus	XP_040554478.1	1.9
AEF07078.1	Gallus gallus	XP_040523612.1	1.9
AEF07078.1	Gallus gallus	XP_040523611.1	1.9
AEF07078.1	Gallus gallus	XP_040554477.1	1.9
AEF07078.1	Gallus gallus	XP_040554476.1	1.9
AEF07078.1	Gallus gallus	XP_040523610.1	1.9
AEF07078.1	Gallus gallus	XP_040523609.1	1.9
AEF07078.1	Gallus gallus	XP_040554475.1	1.9
AEF07117.1	Gallus gallus	XP_040551311.1	0.37
AEF07117.1	Gallus gallus	XP_040518994.1	0.39
AEF07117.1	Gallus gallus	XP_004939193.2	0.39
AEF07117.1	Gallus gallus	XP_040518989.1	0.39
AEF07117.1	Gallus gallus	XP_046757174.1	2
AEF07117.1	Gallus gallus	XP_025011329.2	2
AEF07117.1	Gallus gallus	XP_046757172.1	2
AEF07117.1	Gallus gallus	XP_040540263.1	2
AEF07117.1	Gallus gallus	XP_025008423.1	2.3
AEF07117.1	Gallus gallus	XP_040532756.1	2.3
AEF07120.1	Gallus gallus	XP_015135098.2	0.63
AEF07120.1	Gallus gallus	XP_046785098.1	0.63
AEF07120.1	Gallus gallus	XP_040541561.1	0.63
AEF07120.1	Gallus gallus	XP_015135097.2	0.63
AEF07120.1	Gallus gallus	XP_046785097.1	0.63
AEF07120.1	Gallus gallus	XP_015135096.2	0.63
AEF07120.1	Gallus gallus	XP_040541560.2	0.63
AEF07120.1	Gallus gallus	XP_015135095.2	0.63
AEF07120.1	Gallus gallus	XP_040541559.1	0.63
AEF07120.1	Gallus gallus	XP_015135093.2	0.63
AEF07157.1	Gallus gallus	NP_989822.1	5.5
AEF07313.1	Gallus gallus	XP_015146644.2	6
AEF07313.1	Gallus gallus	XP_015146641.2	6
AEF07457.1	Gallus gallus	XP_025006134.2	3.9
AEF07457.1	Gallus gallus	XP_004941299.2	4.8
AEF07768.1	Gallus gallus	P79780.1	6.7
AEF07768.1	Gallus gallus	NP_990493.2	6.8
AEF07768.1	Gallus gallus	AAB38374.1	6.9
AEF07768.1	Gallus gallus	NP_990493.4	7.1
AEF08270.1	Gallus gallus	NP_001394537.1	2.2
AEF08271.1	Gallus gallus	NP_001135912.3	3.9
AEF08307.1	Gallus gallus	NP_001012715.1	1
AEF08307.1	Gallus gallus	XP_025000930.1	7.3
AEF08307.1	Gallus gallus	XP_046792385.1	7.5
AEF08307.1	Gallus gallus	XP_040511618.1	8.9
AEF08310.1	Gallus gallus	XP_040526751.1	3.3
AEF08310.1	Gallus gallus	XP_040555650.1	3.3
AEF08310.1	Gallus gallus	XP_040526750.1	3.3
AEF08310.1	Gallus gallus	XP_004941214.3	3.3
AEF08310.1	Gallus gallus	XP_040526749.1	3.3
AEF08310.1	Gallus gallus	XP_025006031.2	3.3
AEF08399.1	Gallus gallus	XP_040523766.1	8.4
AEF08399.1	Gallus gallus	XP_040523753.1	8.6
AEF08592.1	Gallus gallus	AFL55413.1	7.1
AEF08592.1	Gallus gallus	AFL55411.1	8.7
AEF08636.1	Gallus gallus	XP_004944624.1	5.3
AEF08636.1	Gallus gallus	XP_004944623.1	5.3
AEF08636.1	Gallus gallus	XP_015148892.1	6.4
AEF08737.1	Gallus gallus	XP_015149148.1	2.5
AEF08737.1	Gallus gallus	XP_046756470.1	6.7
AEF08737.1	Gallus gallus	XP_040503046.1	7.3
AEF09035.1	Gallus gallus	XP_040508439.1	3.4
AEF09035.1	Gallus gallus	XP_015153936.1	3.7
AEF09035.1	Gallus gallus	XP_015153930.1	4
AEF09108.1	Gallus gallus	XP_040540798.1	7.3
AEF09288.1	Gallus gallus	NP_989661.1	7.42e-21
AEF09288.1	Gallus gallus	NP_989898.1	3.89e-20
AEF09288.1	Gallus gallus	XP_046760099.1	1.38e-18
AEF09288.1	Gallus gallus	XP_046760099.1	0.005
AEF09288.1	Gallus gallus	NP_001005431.1	1.46e-18
AEF09288.1	Gallus gallus	NP_001005431.1	0.005
AEF09288.1	Gallus gallus	CAG31642.1	9.99e-18
AEF09288.1	Gallus gallus	XP_046768889.1	2.56e-17
AEF09288.1	Gallus gallus	XP_040518541.1	1.62e-16
AEF09288.1	Gallus gallus	CAG32009.1	3.22e-16
AEF09288.1	Gallus gallus	NP_001006250.2	3.22e-16
AEF09288.1	Gallus gallus	NP_989972.1	1.00e-14
AEF09471.1	Gallus gallus	XP_040507603.1	8.2
AEF09471.1	Gallus gallus	XP_040507592.1	9.6
AEF09472.1	Gallus gallus	NP_989517.1	1.8
AEF09472.1	Gallus gallus	XP_046762284.1	3
AEF09474.1	Gallus gallus	NP_001385304.1	4.6
AEF09474.1	Gallus gallus	XP_046777310.1	4.6
AEF09474.1	Gallus gallus	BAC75633.1	7.8
AEF09474.1	Gallus gallus	NP_989733.3	8.1
AEF09827.1	Gallus gallus	XP_040545319.1	7.4
AEF10030.1	Gallus gallus	NP_001383431.1	8
AEF10030.1	Gallus gallus	NP_990218.1	8.6
AEF10030.1	Gallus gallus	NP_001383432.1	8.8
AEF10030.1	Gallus gallus	NP_001383433.1	9.2
AEF10041.1	Gallus gallus	BAG30888.1	0.55
AEF10041.1	Gallus gallus	XP_015140025.1	0.84
AEF10041.1	Gallus gallus	XP_040522758.1	0.85
AEF10041.1	Gallus gallus	XP_025004824.1	0.88
AEF10041.1	Gallus gallus	XP_004940410.1	0.88
AEF10041.1	Gallus gallus	XP_003641086.2	0.93
AEF10041.1	Gallus gallus	XP_046795108.1	0.95
AEF10041.1	Gallus gallus	XP_040545271.1	7.5
AEF10041.1	Gallus gallus	XP_040507464.1	7.7
AEF10041.1	Gallus gallus	XP_046787652.1	8.4
AEF06168.1	Gallus gallus	XP_040518276.1	1.9
AEF06168.1	Gallus gallus	XP_046799681.1	7.4
AEF06168.1	Gallus gallus	XP_046777675.1	7.7
AEF06168.1	Gallus gallus	NP_001376380.2	9.3
AEF06277.1	Gallus gallus	XP_046799452.1	4.9
AEF06277.1	Gallus gallus	XP_001231701.4	6.3
AEF06441.1	Gallus gallus	XP_414258.3	8.1
AEF06480.1	Gallus gallus	XP_046777675.1	0.13
AEF06480.1	Gallus gallus	XP_046799681.1	0.13
AEF06480.1	Gallus gallus	XP_046773277.1	6.5
AEF06480.1	Gallus gallus	XP_015150100.1	7.2
AEF06480.1	Gallus gallus	XP_040539146.1	8
AEF06853.1	Gallus gallus	XP_046800638.1	1.32e-08
AEF06853.1	Gallus gallus	XP_422503.4	2.04e-08
AEF06853.1	Gallus gallus	XP_040534478.1	2.32e-08
AEF06853.1	Gallus gallus	XP_046759613.1	0.003
AEF06853.1	Gallus gallus	XP_040546038.1	0.005
AEF06853.1	Gallus gallus	XP_046757113.1	0.44
AEF06853.1	Gallus gallus	NP_001376509.1	0.46
AEF06853.1	Gallus gallus	XP_040503963.1	0.47
AEF06853.1	Gallus gallus	XP_040543082.2	0.72
AEF06853.1	Gallus gallus	XP_040503968.1	0.76
AEF06900.1	Gallus gallus	NP_989783.1	1.5
AEF07299.1	Gallus gallus	AAG46055.1	6.79e-50
AEF07299.1	Gallus gallus	NP_989542.2	9.83e-50
AEF07299.1	Gallus gallus	AAK97214.1	8.43e-49
AEF07299.1	Gallus gallus	NP_001007491.1	0.7
AEF07299.1	Gallus gallus	CAH65427.1	2.6
AEF07299.1	Gallus gallus	NP_001006135.1	4.4
AEF07299.1	Gallus gallus	XP_040554908.1	7.1
AEF07299.1	Gallus gallus	NP_001182479.2	7.2
AEF07365.1	Gallus gallus	NP_001004386.1	9
AEF07365.1	Gallus gallus	XP_046763710.1	9.1
AEF07926.1	Gallus gallus	XP_040529909.1	2.65e-13
AEF07926.1	Gallus gallus	XP_040529909.1	9.90e-08
AEF07926.1	Gallus gallus	XP_040529909.1	0.002
AEF07926.1	Gallus gallus	XP_040529909.1	0.002
AEF07926.1	Gallus gallus	XP_040529909.1	0.088
AEF07926.1	Gallus gallus	XP_040529909.1	0.99
AEF07926.1	Gallus gallus	XP_040529909.1	5.3
AEF07926.1	Gallus gallus	XP_040529910.1	2.79e-13
AEF07926.1	Gallus gallus	XP_040529910.1	1.06e-07
AEF07926.1	Gallus gallus	XP_040529910.1	0.002
AEF07926.1	Gallus gallus	XP_040529910.1	0.002
AEF07926.1	Gallus gallus	XP_040529910.1	0.092
AEF07926.1	Gallus gallus	XP_040529910.1	1
AEF07926.1	Gallus gallus	XP_040529910.1	5.6
AEF07926.1	Gallus gallus	XP_040538789.1	0.006
AEF07926.1	Gallus gallus	XP_040538789.1	0.01
AEF07926.1	Gallus gallus	XP_040538789.1	0.38
AEF07926.1	Gallus gallus	XP_046783087.1	0.007
AEF07926.1	Gallus gallus	XP_046783087.1	0.009
AEF07926.1	Gallus gallus	XP_046783087.1	0.47
AEF07926.1	Gallus gallus	XP_046756415.1	0.009
AEF07926.1	Gallus gallus	XP_046756415.1	0.013
AEF07926.1	Gallus gallus	XP_046756415.1	0.72
AEF07926.1	Gallus gallus	XP_015149110.2	0.01
AEF07926.1	Gallus gallus	XP_015149110.2	0.012
AEF07926.1	Gallus gallus	XP_015149110.2	0.55
AEF07926.1	Gallus gallus	NP_001264573.1	0.093
AEF07926.1	Gallus gallus	XP_046796579.1	0.095
AEF07926.1	Gallus gallus	XP_040527601.1	0.1
AEF07926.1	Gallus gallus	XP_040555230.1	0.11
AEF08065.1	Gallus gallus	CAG31811.1	3.6
AEF08065.1	Gallus gallus	XP_015141762.2	8.1
AEF08065.1	Gallus gallus	XP_015141761.2	8.1
AEF08065.1	Gallus gallus	XP_025007118.2	8.2
AEF08066.1	Gallus gallus	XP_046766476.1	3
AEF08066.1	Gallus gallus	XP_046766465.1	3
AEF08066.1	Gallus gallus	XP_046766477.1	3.2
AEF08066.1	Gallus gallus	XP_046766464.1	3.2
AEF08066.1	Gallus gallus	XP_046766463.1	3.4
AEF08066.1	Gallus gallus	XP_046766455.1	3.6
AEF08066.1	Gallus gallus	XP_046766454.1	3.6
AEF08066.1	Gallus gallus	XP_046766457.1	3.7
AEF08066.1	Gallus gallus	XP_046766461.1	3.7
AEF08066.1	Gallus gallus	XP_046766466.1	3.7
AEF08173.1	Gallus gallus	XP_040518040.1	5.6
AEF08173.1	Gallus gallus	XP_046779241.1	5.8
AEF08173.1	Gallus gallus	XP_046765943.1	6
AEF08173.1	Gallus gallus	XP_003641721.4	6.4
AEF08173.1	Gallus gallus	XP_040533877.1	6.4
AEF08173.1	Gallus gallus	XP_046765944.1	6.7
AEF08431.1	Gallus gallus	XP_025010885.2	3.6
AEF08431.1	Gallus gallus	XP_046783465.1	3.7
AEF08431.1	Gallus gallus	XP_046783466.1	3.9
AEF08431.1	Gallus gallus	XP_015150290.2	4
AEF08431.1	Gallus gallus	NP_001006573.2	4.5
AEF08431.1	Gallus gallus	CAG31073.1	4.6
AEF08915.1	Gallus gallus	XP_046780211.1	2.3
AEF08915.1	Gallus gallus	NP_001383406.1	2.3
AEF08915.1	Gallus gallus	NP_001383406.2	2.3
AEF08915.1	Gallus gallus	XP_046762921.1	2.8
AEF09385.1	Gallus gallus	XP_015130933.1	1.41e-84
AEF09385.1	Gallus gallus	XP_004934400.3	2.75e-83
AEF09385.1	Gallus gallus	XP_040543809.1	2.72e-65
AEF09385.1	Gallus gallus	XP_417308.5	9.03e-65
AEF09385.1	Gallus gallus	XP_040540799.2	4.42e-57
AEF09385.1	Gallus gallus	XP_415237.5	8.33e-57
AEF09385.1	Gallus gallus	XP_046787008.1	1.82e-50
AEF09385.1	Gallus gallus	XP_046758915.1	5.50e-50
AEF09385.1	Gallus gallus	CAJ18333.1	5.00e-30
AEF09385.1	Gallus gallus	XP_015155510.3	6.3
AEF10024.1	Gallus gallus	XP_015141773.3	5
AEF10024.1	Gallus gallus	XP_015141772.3	5
AEF10024.1	Gallus gallus	XP_040528397.1	5.2
AEF10024.1	Gallus gallus	XP_040528396.1	5.2
AEF10024.1	Gallus gallus	XP_040557385.1	5.4
AEF10024.1	Gallus gallus	XP_040557384.1	5.4
AEF10024.1	Gallus gallus	XP_040528395.1	5.5
AEF10024.1	Gallus gallus	XP_040528394.1	5.5
AEF10148.1	Gallus gallus	XP_015153663.2	0.078
AEF10148.1	Gallus gallus	XP_004942001.1	0.09
AEF10148.1	Gallus gallus	XP_040530872.1	0.09
AEF10148.1	Gallus gallus	XP_015143515.1	0.1
AEF10148.1	Gallus gallus	XP_040530870.1	0.11
AEF10148.1	Gallus gallus	XP_025007441.1	0.11
AEF10148.1	Gallus gallus	XP_040558865.1	0.11
AEF10148.1	Gallus gallus	XP_025007439.1	0.12
AEF10148.1	Gallus gallus	XP_040525882.1	0.42
AEF10148.1	Gallus gallus	XP_046772960.1	0.45
AEF10232.1	Gallus gallus	XP_040519895.1	1.3
AEF10232.1	Gallus gallus	XP_040519894.1	1.3
AEF10232.1	Gallus gallus	XP_003640734.4	1.3
AEF10232.1	Gallus gallus	XP_046789036.1	1.3
AEF10232.1	Gallus gallus	XP_046768042.1	1.3
AEF10232.1	Gallus gallus	XP_015137045.3	6.2
AEF10232.1	Gallus gallus	XP_040515838.1	6.7
AEF10232.1	Gallus gallus	XP_046765853.1	7.7
AEF10232.1	Gallus gallus	XP_046768643.1	7.7
AEF10232.1	Gallus gallus	XP_046765852.1	8.4
AEF10334.1	Gallus gallus	XP_046769064.1	0.93
AEF10334.1	Gallus gallus	XP_040552734.1	0.95
AEF10334.1	Gallus gallus	XP_040549643.1	3.9
AEF10334.1	Gallus gallus	XP_040549644.1	4.9
AEF10334.1	Gallus gallus	ADB44207.1	5.5
AEF10334.1	Gallus gallus	NP_001165242.2	5.7
AEF10334.1	Gallus gallus	XP_040510717.1	5.8
AEF10334.1	Gallus gallus	XP_040510888.1	7.5
AEF10334.1	Gallus gallus	XP_040510714.1	8.8
AEF10364.1	Gallus gallus	XP_025006099.1	2.3
AEF10364.1	Gallus gallus	XP_046772739.1	2.3
AEF10364.1	Gallus gallus	XP_040525385.1	3
AEF10364.1	Gallus gallus	XP_040525387.1	3.2
AEF10382.1	Gallus gallus	XP_040518476.1	0.44
AEF10382.1	Gallus gallus	XP_040518475.1	0.44
AEF10382.1	Gallus gallus	XP_418787.3	0.45
AEF10382.1	Gallus gallus	XP_004939502.2	0.46
AEF10382.1	Gallus gallus	XP_040518474.1	0.47
AEF05956.1	Homo sapiens	AAG16627.2	1.6
AEF05956.1	Homo sapiens	EAW55448.1	1.6
AEF05956.1	Homo sapiens	NP_001494.2	1.6
AEF05956.1	Homo sapiens	KAI4016984.1	1.6
AEF05956.1	Homo sapiens	KAI2541014.1	1.6
AEF05956.1	Homo sapiens	AAA36445.1	1.7
AEF05956.1	Homo sapiens	CAC14844.1	1.7
AEF05956.1	Homo sapiens	EAW55450.1	1.7
AEF05956.1	Homo sapiens	XP_016866242.1	1.7
AEF05956.1	Homo sapiens	AAH07614.1	2
AEF05959.1	Homo sapiens	NP_065156.5	0.14
AEF05959.1	Homo sapiens	NP_851607.2	0.15
AEF05959.1	Homo sapiens	XP_011508104.1	0.17
AEF05959.1	Homo sapiens	XP_054193769.1	0.17
AEF05959.1	Homo sapiens	XP_054193767.1	0.18
AEF05959.1	Homo sapiens	XP_054193771.1	0.19
AEF05959.1	Homo sapiens	BAG65292.1	0.44
AEF05959.1	Homo sapiens	AAH14662.1	0.78
AEF05959.1	Homo sapiens	KAI4083906.1	0.84
AEF05959.1	Homo sapiens	AAN23123.1	1.2
AEF05960.1	Homo sapiens	QEP21960.1	8.3
AEF06109.1	Homo sapiens	QAV56372.1	8.8
AEF06111.1	Homo sapiens	QAV56347.1	1.8
AEF06111.1	Homo sapiens	QAV56363.1	3.5
AEF06112.1	Homo sapiens	USH96594.1	0.018
AEF06112.1	Homo sapiens	WHP78490.1	0.028
AEF06112.1	Homo sapiens	QEP14202.1	0.032
AEF06112.1	Homo sapiens	QRG34173.1	0.05
AEF06112.1	Homo sapiens	AAZ09102.1	0.052
AEF06112.1	Homo sapiens	ANY91431.1	0.06
AEF06112.1	Homo sapiens	QEP20596.1	0.085
AEF06112.1	Homo sapiens	QKK35633.1	0.097
AEF06112.1	Homo sapiens	CAA85589.1	0.15
AEF06112.1	Homo sapiens	AHJ39695.1	0.17
AEF06144.1	Homo sapiens	3NZI_A	2.68e-45
AEF06144.1	Homo sapiens	KAI2557532.1	4.67e-45
AEF06144.1	Homo sapiens	3NUM_A	9.24e-45
AEF06144.1	Homo sapiens	NP_002766.1	2.36e-44
AEF06144.1	Homo sapiens	AAC97211.1	2.40e-44
AEF06144.1	Homo sapiens	AAH11352.1	2.57e-44
AEF06144.1	Homo sapiens	BAG52446.1	3.11e-44
AEF06144.1	Homo sapiens	NP_444272.1	1.90e-41
AEF06144.1	Homo sapiens	NP_444272.1	0.12
AEF06144.1	Homo sapiens	4RI0_A	1.90e-41
AEF06144.1	Homo sapiens	4RI0_A	0.13
AEF06144.1	Homo sapiens	EAW82345.1	6.14e-40
AEF06144.1	Homo sapiens	EAW82345.1	0.12
AEF06159.1	Homo sapiens	KAI2598171.1	9.64e-08
AEF06159.1	Homo sapiens	AAH11681.1	1.61e-07
AEF06159.1	Homo sapiens	BAD96377.1	2.09e-07
AEF06159.1	Homo sapiens	NP_056195.3	2.14e-07
AEF06159.1	Homo sapiens	AAH07830.1	1.06e-06
AEF06159.1	Homo sapiens	AAD34046.1	2.67e-06
AEF06159.1	Homo sapiens	BAG53408.1	0.001
AEF06159.1	Homo sapiens	BAG60116.1	0.002
AEF06232.1	Homo sapiens	AEX28474.1	0.81
AEF06232.1	Homo sapiens	AAB06439.1	2
AEF06233.1	Homo sapiens	ABE66902.1	9
AEF06668.1	Homo sapiens	XP_016859591.1	0.055
AEF06668.1	Homo sapiens	KAI2523413.1	0.19
AEF06668.1	Homo sapiens	XP_047300256.1	0.19
AEF06668.1	Homo sapiens	XP_016859587.1	0.2
AEF06668.1	Homo sapiens	NP_001034842.2	0.2
AEF06668.1	Homo sapiens	XP_047300271.1	0.2
AEF06668.1	Homo sapiens	XP_047300255.1	0.2
AEF06668.1	Homo sapiens	XP_016859590.1	0.21
AEF06668.1	Homo sapiens	XP_016859589.1	0.21
AEF06668.1	Homo sapiens	EAX00134.1	0.31
AEF06670.1	Homo sapiens	NP_056073.1	0.55
AEF06670.1	Homo sapiens	XP_006717081.1	0.55
AEF06670.1	Homo sapiens	EAW87356.1	0.56
AEF06670.1	Homo sapiens	KAI4008117.1	0.56
AEF06670.1	Homo sapiens	XP_006717082.1	0.75
AEF06670.1	Homo sapiens	BAG64190.1	1.2
AEF06670.1	Homo sapiens	BAG53923.1	1.7
AEF06670.1	Homo sapiens	XP_054229368.1	1.7
AEF06670.1	Homo sapiens	XP_047285592.1	1.8
AEF06670.1	Homo sapiens	XP_016875496.1	2.2
AEF06743.1	Homo sapiens	2XHD_A	2.95e-09
AEF06743.1	Homo sapiens	5YBF_A	7.56e-09
AEF06743.1	Homo sapiens	3R7X_A	7.85e-09
AEF06743.1	Homo sapiens	3RNN_A	1.74e-08
AEF06743.1	Homo sapiens	EAX04871.1	4.34e-08
AEF06743.1	Homo sapiens	3RN8_A	6.37e-08
AEF06743.1	Homo sapiens	2ZNS_A	9.42e-08
AEF06743.1	Homo sapiens	4MF3_A	9.56e-08
AEF06743.1	Homo sapiens	5H8S_A	9.88e-08
AEF06743.1	Homo sapiens	XP_011541088.1	2.86e-07
AEF06801.1	Homo sapiens	5H8F_A	0.009
AEF06801.1	Homo sapiens	NP_001265482.1	0.37
AEF06801.1	Homo sapiens	DAJ12210.1	0.37
AEF06801.1	Homo sapiens	8E92_B	0.37
AEF06801.1	Homo sapiens	XP_006721909.2	0.38
AEF06801.1	Homo sapiens	NP_000826.2	0.38
AEF06801.1	Homo sapiens	AAA88096.1	0.38
AEF06801.1	Homo sapiens	XP_054171850.1	0.38
AEF06801.1	Homo sapiens	XP_054171852.1	0.38
AEF06801.1	Homo sapiens	AAB71624.1	0.38
AEF06804.1	Homo sapiens	NP_001265482.1	0.034
AEF06804.1	Homo sapiens	DAJ12210.1	0.034
AEF06804.1	Homo sapiens	8E92_B	0.034
AEF06804.1	Homo sapiens	AAH41128.1	0.034
AEF06804.1	Homo sapiens	XP_006721909.2	0.036
AEF06804.1	Homo sapiens	NP_000826.2	0.036
AEF06804.1	Homo sapiens	AAA88096.1	0.036
AEF06804.1	Homo sapiens	XP_054171850.1	0.036
AEF06804.1	Homo sapiens	XP_054171852.1	0.036
AEF06804.1	Homo sapiens	AAB71624.1	0.036
AEF06836.1	Homo sapiens	QRG33667.1	3.7
AEF06836.1	Homo sapiens	KAI2593832.1	6.3
AEF06836.1	Homo sapiens	XP_005273222.1	9.7
AEF06920.1	Homo sapiens	6FN8_A	2.19e-11
AEF06920.1	Homo sapiens	6FOL_A	2.36e-11
AEF06920.1	Homo sapiens	1DO5_A	2.63e-11
AEF06920.1	Homo sapiens	6FON_A	3.30e-11
AEF06920.1	Homo sapiens	KAI2561207.1	5.07e-11
AEF06920.1	Homo sapiens	NP_005116.1	5.26e-11
AEF06920.1	Homo sapiens	AAM50090.1	5.32e-11
AEF06920.1	Homo sapiens	6FP6_B	5.76e-11
AEF06920.1	Homo sapiens	EAW74550.1	7.52e-11
AEF06920.1	Homo sapiens	1BA9_A	1.21e-10
AEF06947.1	Homo sapiens	4CDH_A	0.003
AEF06958.1	Homo sapiens	AAK67629.1	0.008
AEF06958.1	Homo sapiens	AAH20779.1	0.008
AEF06958.1	Homo sapiens	NP_001350162.1	0.008
AEF06958.1	Homo sapiens	AAQ89467.1	0.008
AEF06958.1	Homo sapiens	KAI4009928.1	0.017
AEF06958.1	Homo sapiens	BAG61396.1	1.5
AEF06964.1	Homo sapiens	XP_047277868.1	1.18e-09
AEF06964.1	Homo sapiens	XP_047277868.1	3.73e-04
AEF06964.1	Homo sapiens	XP_047277868.1	0.002
AEF06964.1	Homo sapiens	XP_047277868.1	0.6
AEF06964.1	Homo sapiens	XP_047277868.1	4.7
AEF06964.1	Homo sapiens	NP_060104.2	2.01e-09
AEF06964.1	Homo sapiens	NP_060104.2	5.33e-04
AEF06964.1	Homo sapiens	NP_060104.2	0.002
AEF06964.1	Homo sapiens	NP_060104.2	0.58
AEF06964.1	Homo sapiens	NP_060104.2	4.4
AEF06964.1	Homo sapiens	AAH68518.1	2.12e-09
AEF06964.1	Homo sapiens	AAH68518.1	5.33e-04
AEF06964.1	Homo sapiens	AAH68518.1	0.002
AEF06964.1	Homo sapiens	AAH68518.1	0.6
AEF06964.1	Homo sapiens	AAH68518.1	4.5
AEF06964.1	Homo sapiens	XP_047277867.1	2.33e-08
AEF06964.1	Homo sapiens	XP_047277867.1	0.002
AEF06964.1	Homo sapiens	XP_047277867.1	2.1
AEF06964.1	Homo sapiens	EAW50922.1	3.48e-05
AEF06964.1	Homo sapiens	EAW50922.1	0.008
AEF06964.1	Homo sapiens	EAW50922.1	0.043
AEF06964.1	Homo sapiens	EAW50922.1	1.1
AEF06964.1	Homo sapiens	EAW50922.1	5.6
AEF06964.1	Homo sapiens	EAW63590.1	2.79e-04
AEF06964.1	Homo sapiens	EAW63590.1	0.001
AEF06964.1	Homo sapiens	EAW63590.1	0.003
AEF06964.1	Homo sapiens	EAW63590.1	0.15
AEF06964.1	Homo sapiens	EAW63590.1	0.87
AEF06964.1	Homo sapiens	EAW63589.1	0.003
AEF06964.1	Homo sapiens	EAW63589.1	0.005
AEF06964.1	Homo sapiens	EAW63589.1	5.9
AEF06964.1	Homo sapiens	EAX02753.1	0.003
AEF06964.1	Homo sapiens	EAX02753.1	0.004
AEF06964.1	Homo sapiens	EAX02753.1	5
AEF07017.1	Homo sapiens	XP_047305997.1	1.7
AEF07017.1	Homo sapiens	XP_047305996.1	1.7
AEF07017.1	Homo sapiens	EAX05654.1	1.8
AEF07017.1	Homo sapiens	EAX05657.1	1.8
AEF07017.1	Homo sapiens	AAH19963.1	8.7
AEF07018.1	Homo sapiens	NP_001366569.1	1.2
AEF07018.1	Homo sapiens	EAW71217.1	1.5
AEF07018.1	Homo sapiens	KAI2527765.1	1.5
AEF07018.1	Homo sapiens	XP_054198629.1	1.5
AEF07078.1	Homo sapiens	XP_047282500.1	0.086
AEF07078.1	Homo sapiens	XP_054223964.1	0.087
AEF07078.1	Homo sapiens	BAB84926.1	0.1
AEF07078.1	Homo sapiens	NP_938018.1	0.13
AEF07078.1	Homo sapiens	KAI4074753.1	0.13
AEF07078.1	Homo sapiens	KAI2563425.1	0.13
AEF07078.1	Homo sapiens	KAI2563424.1	0.13
AEF07078.1	Homo sapiens	NP_001138762.1	0.14
AEF07078.1	Homo sapiens	KAI4074752.1	0.14
AEF07078.1	Homo sapiens	BAB85016.1	0.32
AEF07117.1	Homo sapiens	KAI2571768.1	0.027
AEF07117.1	Homo sapiens	KAI4061395.1	0.035
AEF07117.1	Homo sapiens	EAW80987.1	0.035
AEF07117.1	Homo sapiens	BAA86444.1	0.039
AEF07117.1	Homo sapiens	KAI2571766.1	0.28
AEF07117.1	Homo sapiens	NP_001161840.1	0.29
AEF07117.1	Homo sapiens	AAH98578.1	0.3
AEF07117.1	Homo sapiens	XP_011535309.1	0.35
AEF07117.1	Homo sapiens	KAI4034092.1	0.9
AEF07117.1	Homo sapiens	NP_001240755.1	1.4
AEF07120.1	Homo sapiens	KAI2554709.1	2.1
AEF07120.1	Homo sapiens	KAI4009237.1	2.1
AEF07120.1	Homo sapiens	KAI2554708.1	2.1
AEF07120.1	Homo sapiens	EAW88332.1	2.2
AEF07120.1	Homo sapiens	BAA83014.2	2.2
AEF07120.1	Homo sapiens	EAW88331.1	2.2
AEF07120.1	Homo sapiens	KAI2554704.1	2.2
AEF07120.1	Homo sapiens	NP_001397971.1	2.2
AEF07120.1	Homo sapiens	KAI4009233.1	2.2
AEF07120.1	Homo sapiens	NP_001597.2	2.2
AEF07442.1	Homo sapiens	EAX01958.1	0.94
AEF07457.1	Homo sapiens	NP_001287904.1	1.3
AEF07457.1	Homo sapiens	NP_001287902.1	1.9
AEF07457.1	Homo sapiens	NP_001287901.1	2
AEF07457.1	Homo sapiens	ABF60230.1	2.3
AEF07457.1	Homo sapiens	AAH62729.1	2.3
AEF07457.1	Homo sapiens	EAW75087.1	2.8
AEF07457.1	Homo sapiens	ABL09300.1	3.5
AEF07457.1	Homo sapiens	NP_001243391.1	4.1
AEF08184.1	Homo sapiens	QKY76448.1	7.8
AEF08270.1	Homo sapiens	CAA06444.1	5
AEF08271.1	Homo sapiens	NP_001129109.1	8.2
AEF08334.1	Homo sapiens	AAB41769.1	6.8
AEF08592.1	Homo sapiens	XP_024304121.1	1.4
AEF08592.1	Homo sapiens	XP_016872707.1	1.4
AEF08592.1	Homo sapiens	AAH40277.1	1.4
AEF08592.1	Homo sapiens	NP_001032406.1	1.6
AEF08592.1	Homo sapiens	XP_016872706.1	1.6
AEF08636.1	Homo sapiens	2Z6M_A	7
AEF08636.1	Homo sapiens	3ES3_A	8.5
AEF08636.1	Homo sapiens	3ERZ_A	8.8
AEF08888.1	Homo sapiens	XP_011525778.1	4.7
AEF08888.1	Homo sapiens	Q587J7.2	4.7
AEF08888.1	Homo sapiens	XP_011525777.1	4.8
AEF08888.1	Homo sapiens	XP_047295628.1	4.8
AEF08888.1	Homo sapiens	XP_047295627.1	4.8
AEF08888.1	Homo sapiens	XP_011525776.1	4.8
AEF08888.1	Homo sapiens	XP_047295626.1	4.8
AEF08888.1	Homo sapiens	XP_011525775.1	4.8
AEF08888.1	Homo sapiens	NP_001353031.1	4.8
AEF08888.1	Homo sapiens	XP_011525773.1	4.8
AEF09288.1	Homo sapiens	4IPX_A	5.30e-22
AEF09288.1	Homo sapiens	4R0X_A	6.49e-22
AEF09288.1	Homo sapiens	KAI2593819.1	5.54e-21
AEF09288.1	Homo sapiens	7A6W_AAA	5.58e-21
AEF09288.1	Homo sapiens	3O5E_A	6.21e-21
AEF09288.1	Homo sapiens	7AWF_A	6.59e-21
AEF09288.1	Homo sapiens	1BKF_A	7.16e-21
AEF09288.1	Homo sapiens	NP_001382909.1	8.17e-21
AEF09288.1	Homo sapiens	2PPO_A	8.21e-21
AEF09288.1	Homo sapiens	6VCU_A	9.06e-21
AEF09472.1	Homo sapiens	CAC10661.1	7
AEF09473.1	Homo sapiens	EAW93319.1	1.7
AEF09474.1	Homo sapiens	EAW64437.1	6.3
AEF09689.1	Homo sapiens	ADT62916.2	1.50e-04
AEF09689.1	Homo sapiens	ADI55326.1	0.023
AEF09689.1	Homo sapiens	2V3Q_A	1.3
AEF09827.1	Homo sapiens	KAI2572496.1	6.6
AEF10030.1	Homo sapiens	QCR99119.1	1.4
AEF10041.1	Homo sapiens	CAD97685.1	4.7
AEF10041.1	Homo sapiens	EAW51610.1	6.1
AEF10041.1	Homo sapiens	XP_024306316.1	6.1
AEF10041.1	Homo sapiens	XP_005257021.1	6.1
AEF10041.1	Homo sapiens	XP_016879529.1	6.3
AEF10041.1	Homo sapiens	NP_001138298.1	6.4
AEF10041.1	Homo sapiens	NP_001138297.1	6.7
AEF10041.1	Homo sapiens	XP_054170731.1	6.8
AEF10041.1	Homo sapiens	XP_016879527.1	6.8
AEF10041.1	Homo sapiens	NP_006686.1	6.8
AEF10350.1	Homo sapiens	CAA60685.1	1.7
AEF10350.1	Homo sapiens	NP_005236.2	7.5
AEF10350.1	Homo sapiens	EAX04614.1	7.6
AEF10350.1	Homo sapiens	EAX04615.1	8.1
AEF10350.1	Homo sapiens	EAX04616.1	8.2
AEF10383.1	Homo sapiens	EAX01825.1	8.3
AEF06277.1	Homo sapiens	AAG23762.1	2
AEF06480.1	Homo sapiens	CAA45938.1	0.4
AEF06480.1	Homo sapiens	CAA49245.1	0.41
AEF06480.1	Homo sapiens	EAX11015.1	0.53
AEF06480.1	Homo sapiens	KAI4037133.1	0.53
AEF06480.1	Homo sapiens	CAD12455.1	0.53
AEF06480.1	Homo sapiens	NP_003310.4	0.53
AEF06480.1	Homo sapiens	CAA62188.1	0.53
AEF06480.1	Homo sapiens	KAI2525978.1	0.53
AEF06480.1	Homo sapiens	XP_054199642.1	0.53
AEF06480.1	Homo sapiens	XP_024308867.1	0.53
AEF06499.1	Homo sapiens	NP_689994.2	1.8
AEF06499.1	Homo sapiens	AAI32682.1	1.8
AEF06499.1	Homo sapiens	XP_054171628.1	2
AEF06499.1	Homo sapiens	XP_005278290.1	2.3
AEF06499.1	Homo sapiens	NP_001308324.1	2.3
AEF06499.1	Homo sapiens	EAW80121.1	4.9
AEF06499.1	Homo sapiens	XP_047291017.1	5.2
AEF06499.1	Homo sapiens	XP_006721865.1	7.3
AEF06499.1	Homo sapiens	XP_047291015.1	9.6
AEF06853.1	Homo sapiens	NP_660286.1	2.83e-08
AEF06853.1	Homo sapiens	EAX06634.1	3.22e-08
AEF06853.1	Homo sapiens	BAC03583.1	3.84e-08
AEF06853.1	Homo sapiens	XP_047283538.1	0.073
AEF06853.1	Homo sapiens	CAI59783.1	0.099
AEF06853.1	Homo sapiens	AAH37283.1	0.11
AEF06853.1	Homo sapiens	NP_005848.2	0.11
AEF06853.1	Homo sapiens	BAH12321.1	0.12
AEF06853.1	Homo sapiens	NP_001167005.1	0.12
AEF06853.1	Homo sapiens	NP_001171710.1	0.13
AEF06919.1	Homo sapiens	EAW50063.1	7.1
AEF07299.1	Homo sapiens	1N0J_A	3.56e-47
AEF07299.1	Homo sapiens	7KLB_A	3.68e-47
AEF07299.1	Homo sapiens	1EM1_A	7.24e-47
AEF07299.1	Homo sapiens	2QKA_A	1.10e-46
AEF07299.1	Homo sapiens	2QKC_A	1.32e-46
AEF07299.1	Homo sapiens	AAA36622.1	1.52e-46
AEF07299.1	Homo sapiens	1VAR_A	1.55e-46
AEF07299.1	Homo sapiens	CAA68533.1	2.20e-46
AEF07299.1	Homo sapiens	KAI2544458.1	2.51e-46
AEF07299.1	Homo sapiens	1LUV_A	2.52e-46
AEF07926.1	Homo sapiens	NP_005056.3	2.10e-10
AEF07926.1	Homo sapiens	NP_005056.3	1.35e-06
AEF07926.1	Homo sapiens	NP_005056.3	5.44e-04
AEF07926.1	Homo sapiens	NP_005056.3	0.005
AEF07926.1	Homo sapiens	NP_005056.3	0.12
AEF07926.1	Homo sapiens	NP_005056.3	2.8
AEF07926.1	Homo sapiens	AAF29413.1	2.19e-10
AEF07926.1	Homo sapiens	AAF29413.1	1.35e-06
AEF07926.1	Homo sapiens	AAF29413.1	6.13e-04
AEF07926.1	Homo sapiens	AAF29413.1	0.005
AEF07926.1	Homo sapiens	AAF29413.1	0.12
AEF07926.1	Homo sapiens	AAF29413.1	2.7
AEF07926.1	Homo sapiens	XP_005268045.1	2.22e-10
AEF07926.1	Homo sapiens	XP_005268045.1	1.44e-06
AEF07926.1	Homo sapiens	XP_005268045.1	0.001
AEF07926.1	Homo sapiens	XP_005268045.1	0.006
AEF07926.1	Homo sapiens	XP_005268045.1	0.13
AEF07926.1	Homo sapiens	XP_005268045.1	3.3
AEF07926.1	Homo sapiens	KAI2572266.1	2.27e-10
AEF07926.1	Homo sapiens	KAI2572266.1	1.37e-06
AEF07926.1	Homo sapiens	KAI2572266.1	6.62e-04
AEF07926.1	Homo sapiens	KAI2572266.1	0.006
AEF07926.1	Homo sapiens	KAI2572266.1	0.13
AEF07926.1	Homo sapiens	KAI2572266.1	3
AEF07926.1	Homo sapiens	KAI4004813.1	6.05e-08
AEF07926.1	Homo sapiens	KAI4004813.1	3.01e-07
AEF07926.1	Homo sapiens	NP_001258468.1	6.16e-08
AEF07926.1	Homo sapiens	NP_001258468.1	2.93e-07
AEF07926.1	Homo sapiens	XP_047296479.1	6.16e-08
AEF07926.1	Homo sapiens	XP_047296479.1	3.09e-07
AEF07926.1	Homo sapiens	XP_006723715.1	6.22e-08
AEF07926.1	Homo sapiens	XP_006723715.1	3.09e-07
AEF07926.1	Homo sapiens	EAX10305.1	6.40e-08
AEF07926.1	Homo sapiens	EAX10305.1	2.43e-07
AEF07926.1	Homo sapiens	XP_011527676.1	6.96e-08
AEF07926.1	Homo sapiens	XP_011527676.1	3.78e-07
AEF07926.1	Homo sapiens	XP_011527676.1	0.11
AEF07926.1	Homo sapiens	XP_011527676.1	1.9
AEF07926.1	Homo sapiens	XP_011527676.1	8.3
AEF08173.1	Homo sapiens	NP_000847.2	0.04
AEF08173.1	Homo sapiens	BAG53331.1	0.04
AEF08173.1	Homo sapiens	3UVJ_A	0.079
AEF08173.1	Homo sapiens	KAI2536350.1	0.1
AEF08173.1	Homo sapiens	NP_001124157.1	0.1
AEF08173.1	Homo sapiens	XP_047306103.1	0.11
AEF08173.1	Homo sapiens	AAF64043.1	0.11
AEF08173.1	Homo sapiens	6JT0_A	0.12
AEF08173.1	Homo sapiens	CAA47145.1	0.12
AEF08173.1	Homo sapiens	NP_001366605.1	0.13
AEF08883.1	Homo sapiens	NP_001369519.1	4.8
AEF08883.1	Homo sapiens	NP_001369518.1	4.8
AEF08883.1	Homo sapiens	NP_001369517.1	4.8
AEF08883.1	Homo sapiens	NP_001369520.1	4.9
AEF08883.1	Homo sapiens	NP_003472.2	4.9
AEF08883.1	Homo sapiens	AAA78934.1	4.9
AEF08883.1	Homo sapiens	3IHP_A	4.9
AEF08883.1	Homo sapiens	NP_001092006.1	4.9
AEF08883.1	Homo sapiens	CAA62690.1	4.9
AEF08883.1	Homo sapiens	CAA58706.1	8.1
AEF08915.1	Homo sapiens	XP_006715399.1	1.2
AEF08915.1	Homo sapiens	XP_011533749.1	1.4
AEF08915.1	Homo sapiens	NP_001010844.1	1.9
AEF08915.1	Homo sapiens	KAI2542993.1	1.9
AEF08915.1	Homo sapiens	4Z79_A	7.3
AEF09385.1	Homo sapiens	AAA35899.1	4.98e-79
AEF09385.1	Homo sapiens	AAA52546.1	5.36e-79
AEF09385.1	Homo sapiens	NP_001275762.1	7.75e-79
AEF09385.1	Homo sapiens	EAW59671.1	1.38e-78
AEF09385.1	Homo sapiens	A6NGU5.2	2.43e-74
AEF09385.1	Homo sapiens	KAI4002016.1	8.81e-71
AEF09385.1	Homo sapiens	XP_011544558.1	1.16e-70
AEF09385.1	Homo sapiens	KAI2596829.1	1.81e-70
AEF09385.1	Homo sapiens	P36268.3	3.53e-70
AEF09385.1	Homo sapiens	KAI4002015.1	3.42e-66
AEF10148.1	Homo sapiens	XP_011541089.1	0.22
AEF10148.1	Homo sapiens	XP_047282796.1	0.23
AEF10148.1	Homo sapiens	XP_011541088.1	0.24
AEF10148.1	Homo sapiens	NP_001269402.1	0.28
AEF10148.1	Homo sapiens	AAH39263.1	0.33
AEF10148.1	Homo sapiens	BAA86534.1	0.35
AEF10148.1	Homo sapiens	EAW80341.1	0.36
AEF10148.1	Homo sapiens	KAI2556507.1	0.36
AEF10148.1	Homo sapiens	DAJ12203.1	0.37
AEF10148.1	Homo sapiens	EAW80338.1	0.37
AEF10232.1	Homo sapiens	6KUY_A	1.11e-56
AEF10232.1	Homo sapiens	8CIC_A	2.09e-56
AEF10232.1	Homo sapiens	8DU3_A	2.10e-56
AEF10232.1	Homo sapiens	5IU4_A	2.56e-56
AEF10232.1	Homo sapiens	5MZJ_A	2.88e-56
AEF10232.1	Homo sapiens	6G7O_A	4.86e-56
AEF10232.1	Homo sapiens	6PT2_A	6.82e-56
AEF10232.1	Homo sapiens	4OR2_A	7.05e-56
AEF10232.1	Homo sapiens	6DRY_A	7.44e-56
AEF10232.1	Homo sapiens	6DRX_A	7.51e-56
AEF10334.1	Homo sapiens	7DV6_A	4
AEF10334.1	Homo sapiens	5E8V_A	4
AEF10382.1	Homo sapiens	BAG51164.1	3
AEF05955.1	Meleagris gallopavo	XP_003202531.3	3.2
AEF05955.1	Meleagris gallopavo	XP_031409589.1	9.5
AEF05956.1	Meleagris gallopavo	XP_003203224.1	0.15
AEF05956.1	Meleagris gallopavo	XP_003202174.1	1.4
AEF05957.1	Meleagris gallopavo	XP_019471335.1	0.016
AEF05957.1	Meleagris gallopavo	XP_031409482.1	0.017
AEF05957.1	Meleagris gallopavo	XP_031409484.1	0.019
AEF05957.1	Meleagris gallopavo	XP_031409485.1	0.02
AEF05957.1	Meleagris gallopavo	XP_031409487.1	0.025
AEF05957.1	Meleagris gallopavo	XP_031409486.1	0.029
AEF05957.1	Meleagris gallopavo	XP_010708247.1	9.2
AEF05957.1	Meleagris gallopavo	XP_003205317.2	9.7
AEF05959.1	Meleagris gallopavo	XP_003211726.3	1.2
AEF05960.1	Meleagris gallopavo	XP_010715590.2	0.45
AEF05960.1	Meleagris gallopavo	XP_019474431.1	2.6
AEF05960.1	Meleagris gallopavo	XP_010714845.1	2.7
AEF05960.1	Meleagris gallopavo	XP_031410147.1	8.4
AEF06109.1	Meleagris gallopavo	XP_010718346.1	4.7
AEF06109.1	Meleagris gallopavo	XP_019465641.1	6.3
AEF06110.1	Meleagris gallopavo	XP_010710415.1	1.7
AEF06110.1	Meleagris gallopavo	XP_019470172.1	4.1
AEF06111.1	Meleagris gallopavo	XP_031410801.1	3.1
AEF06112.1	Meleagris gallopavo	XP_010721437.2	0.28
AEF06112.1	Meleagris gallopavo	XP_003206201.2	3.9
AEF06112.1	Meleagris gallopavo	XP_010718661.1	5.9
AEF06112.1	Meleagris gallopavo	XP_010709768.1	7.7
AEF06112.1	Meleagris gallopavo	XP_031409414.1	9
AEF06126.1	Meleagris gallopavo	XP_010716122.1	4
AEF06126.1	Meleagris gallopavo	XP_010720987.1	4
AEF06126.1	Meleagris gallopavo	XP_003212224.2	4
AEF06126.1	Meleagris gallopavo	XP_010717868.1	4
AEF06126.1	Meleagris gallopavo	XP_031411297.1	4.3
AEF06130.1	Meleagris gallopavo	XP_031410574.1	2
AEF06130.1	Meleagris gallopavo	XP_010709075.1	2.2
AEF06130.1	Meleagris gallopavo	XP_031410483.1	4.5
AEF06144.1	Meleagris gallopavo	XP_010713179.1	7.62e-45
AEF06144.1	Meleagris gallopavo	XP_010713179.1	0.37
AEF06144.1	Meleagris gallopavo	XP_010708824.3	1.78e-43
AEF06144.1	Meleagris gallopavo	XP_010708824.3	0.03
AEF06144.1	Meleagris gallopavo	XP_010710438.1	8.50e-39
AEF06144.1	Meleagris gallopavo	XP_010710438.1	0.15
AEF06144.1	Meleagris gallopavo	XP_003208324.1	0.011
AEF06144.1	Meleagris gallopavo	XP_010709413.1	0.011
AEF06144.1	Meleagris gallopavo	XP_010709413.1	1.3
AEF06144.1	Meleagris gallopavo	XP_019476059.1	0.031
AEF06144.1	Meleagris gallopavo	XP_019476059.1	2.2
AEF06144.1	Meleagris gallopavo	XP_019476060.1	0.032
AEF06144.1	Meleagris gallopavo	XP_019476060.1	2.3
AEF06144.1	Meleagris gallopavo	XP_019476063.1	0.032
AEF06144.1	Meleagris gallopavo	XP_019476063.1	2.3
AEF06144.1	Meleagris gallopavo	XP_019476058.1	0.032
AEF06144.1	Meleagris gallopavo	XP_019476058.1	2.3
AEF06144.1	Meleagris gallopavo	XP_010717561.2	0.033
AEF06144.1	Meleagris gallopavo	XP_010717561.2	2.3
AEF06159.1	Meleagris gallopavo	XP_010723248.1	1.36e-10
AEF06160.1	Meleagris gallopavo	XP_010714834.1	0.021
AEF06160.1	Meleagris gallopavo	XP_010714833.1	0.022
AEF06160.1	Meleagris gallopavo	NP_001290140.1	0.12
AEF06160.1	Meleagris gallopavo	XP_010713210.1	0.23
AEF06160.1	Meleagris gallopavo	XP_010713211.1	0.23
AEF06160.1	Meleagris gallopavo	XP_010713209.1	0.24
AEF06160.1	Meleagris gallopavo	XP_010706679.1	0.65
AEF06160.1	Meleagris gallopavo	XP_010706680.1	0.66
AEF06160.1	Meleagris gallopavo	XP_010722873.1	4.5
AEF06160.1	Meleagris gallopavo	XP_010722874.1	4.7
AEF06179.1	Meleagris gallopavo	XP_010714140.1	1.3
AEF06179.1	Meleagris gallopavo	XP_003203194.1	3
AEF06179.1	Meleagris gallopavo	XP_010718420.1	3.6
AEF06179.1	Meleagris gallopavo	XP_031411480.1	8.9
AEF06179.1	Meleagris gallopavo	XP_019474677.1	9.2
AEF06179.1	Meleagris gallopavo	XP_031413130.1	9.5
AEF06208.1	Meleagris gallopavo	XP_031408527.1	6.34e-04
AEF06208.1	Meleagris gallopavo	XP_019466137.1	0.84
AEF06208.1	Meleagris gallopavo	XP_010724608.2	3
AEF06208.1	Meleagris gallopavo	XP_019470595.2	5.6
AEF06208.1	Meleagris gallopavo	XP_031411689.1	10
AEF06232.1	Meleagris gallopavo	XP_031408045.1	3.1
AEF06232.1	Meleagris gallopavo	XP_010721866.1	7.8
AEF06232.1	Meleagris gallopavo	XP_010721859.1	8.4
AEF06232.1	Meleagris gallopavo	XP_019476408.1	9
AEF06233.1	Meleagris gallopavo	XP_010704759.1	5.4
AEF06233.1	Meleagris gallopavo	XP_010720156.1	5.6
AEF06233.1	Meleagris gallopavo	XP_031408162.1	6
AEF06234.1	Meleagris gallopavo	XP_019466186.1	0.26
AEF06234.1	Meleagris gallopavo	XP_019466185.1	0.27
AEF06234.1	Meleagris gallopavo	XP_031412549.1	1.8
AEF06234.1	Meleagris gallopavo	XP_031412550.1	1.9
AEF06234.1	Meleagris gallopavo	XP_019477990.1	5.1
AEF06234.1	Meleagris gallopavo	XP_010707417.2	6.3
AEF06234.1	Meleagris gallopavo	XP_010725890.1	6.8
AEF06295.1	Meleagris gallopavo	XP_010714131.1	1.7
AEF06295.1	Meleagris gallopavo	XP_010714167.1	1.7
AEF06295.1	Meleagris gallopavo	XP_031411192.1	1.8
AEF06295.1	Meleagris gallopavo	XP_010714102.1	1.8
AEF06295.1	Meleagris gallopavo	XP_010722999.1	4.6
AEF06344.1	Meleagris gallopavo	XP_010704821.1	8.6
AEF06344.1	Meleagris gallopavo	XP_010704823.1	8.7
AEF06475.1	Meleagris gallopavo	XP_010720480.2	1
AEF06475.1	Meleagris gallopavo	XP_010716875.1	1.5
AEF06475.1	Meleagris gallopavo	XP_010715972.1	2.8
AEF06475.1	Meleagris gallopavo	XP_010710628.1	4
AEF06478.1	Meleagris gallopavo	XP_019472562.1	2.7
AEF06478.1	Meleagris gallopavo	XP_019472559.1	2.7
AEF06478.1	Meleagris gallopavo	XP_019472561.1	2.7
AEF06478.1	Meleagris gallopavo	XP_019472564.1	3.1
AEF06514.1	Meleagris gallopavo	XP_019474997.1	0.27
AEF06514.1	Meleagris gallopavo	XP_010715715.1	0.3
AEF06514.1	Meleagris gallopavo	XP_010715714.1	0.3
AEF06514.1	Meleagris gallopavo	XP_010707013.1	2.5
AEF06514.1	Meleagris gallopavo	XP_003203827.2	3.2
AEF06514.1	Meleagris gallopavo	XP_010715066.3	6.9
AEF06556.1	Meleagris gallopavo	XP_003205021.2	0.23
AEF06556.1	Meleagris gallopavo	XP_003205231.2	1.9
AEF06556.1	Meleagris gallopavo	XP_003208081.2	4.4
AEF06556.1	Meleagris gallopavo	XP_031413291.1	4.4
AEF06556.1	Meleagris gallopavo	XP_003212748.1	4.7
AEF06556.1	Meleagris gallopavo	XP_010709279.2	6.9
AEF06556.1	Meleagris gallopavo	XP_019475050.1	9.8
AEF06668.1	Meleagris gallopavo	XP_031408524.1	0.013
AEF06668.1	Meleagris gallopavo	XP_031408524.1	0.29
AEF06668.1	Meleagris gallopavo	XP_010724121.1	0.77
AEF06668.1	Meleagris gallopavo	XP_010715641.1	1.1
AEF06668.1	Meleagris gallopavo	XP_003209407.1	1.3
AEF06668.1	Meleagris gallopavo	XP_031412648.1	2.2
AEF06668.1	Meleagris gallopavo	XP_019468834.1	2.4
AEF06668.1	Meleagris gallopavo	XP_010708626.2	2.5
AEF06668.1	Meleagris gallopavo	XP_010708624.1	6.7
AEF06668.1	Meleagris gallopavo	XP_019478571.1	7.9
AEF06668.1	Meleagris gallopavo	XP_031409871.1	8.3
AEF06670.1	Meleagris gallopavo	XP_003205674.1	0.21
AEF06670.1	Meleagris gallopavo	XP_010721315.1	0.22
AEF06670.1	Meleagris gallopavo	XP_010713297.1	0.25
AEF06670.1	Meleagris gallopavo	XP_031408641.1	0.59
AEF06670.1	Meleagris gallopavo	XP_010707271.1	0.91
AEF06670.1	Meleagris gallopavo	XP_010707269.1	0.91
AEF06670.1	Meleagris gallopavo	XP_010707270.1	0.94
AEF06670.1	Meleagris gallopavo	XP_019477413.1	1.4
AEF06670.1	Meleagris gallopavo	XP_010709256.1	2
AEF06670.1	Meleagris gallopavo	XP_031411066.1	2
AEF06743.1	Meleagris gallopavo	XP_031410423.1	4.00e-08
AEF06743.1	Meleagris gallopavo	XP_019478574.1	9.82e-08
AEF06743.1	Meleagris gallopavo	XP_019478574.1	0.82
AEF06743.1	Meleagris gallopavo	XP_031412250.1	2.07e-05
AEF06743.1	Meleagris gallopavo	XP_010721656.1	3.05e-05
AEF06743.1	Meleagris gallopavo	XP_010721656.1	0.33
AEF06743.1	Meleagris gallopavo	XP_019469867.1	4.37e-05
AEF06743.1	Meleagris gallopavo	XP_003202270.2	4.45e-05
AEF06743.1	Meleagris gallopavo	XP_031410560.1	5.84e-05
AEF06743.1	Meleagris gallopavo	XP_031410560.1	0.006
AEF06743.1	Meleagris gallopavo	XP_019473839.1	6.33e-05
AEF06743.1	Meleagris gallopavo	XP_019473839.1	0.006
AEF06743.1	Meleagris gallopavo	XP_019470640.1	1.33e-04
AEF06743.1	Meleagris gallopavo	XP_019470640.1	0.004
AEF06743.1	Meleagris gallopavo	XP_031410562.1	1.80e-04
AEF06743.1	Meleagris gallopavo	XP_031410562.1	0.001
AEF06746.1	Meleagris gallopavo	XP_010711886.1	2.2
AEF06746.1	Meleagris gallopavo	XP_019471754.1	3.3
AEF06746.1	Meleagris gallopavo	XP_019471125.1	3.6
AEF06746.1	Meleagris gallopavo	XP_010709748.1	3.6
AEF06746.1	Meleagris gallopavo	XP_010709747.1	3.6
AEF06746.1	Meleagris gallopavo	XP_010704993.1	5
AEF06746.1	Meleagris gallopavo	XP_031409106.1	6.8
AEF06801.1	Meleagris gallopavo	XP_031412250.1	0.003
AEF06801.1	Meleagris gallopavo	XP_003202270.2	0.49
AEF06801.1	Meleagris gallopavo	XP_019469867.1	0.5
AEF06801.1	Meleagris gallopavo	XP_019473663.1	3.9
AEF06801.1	Meleagris gallopavo	XP_019473664.1	4.1
AEF06801.1	Meleagris gallopavo	YP_004243711.1	4.8
AEF06801.1	Meleagris gallopavo	XP_010713388.1	5.4
AEF06801.1	Meleagris gallopavo	XP_010713392.1	5.4
AEF06804.1	Meleagris gallopavo	XP_031412250.1	0.002
AEF06804.1	Meleagris gallopavo	XP_031410423.1	0.025
AEF06804.1	Meleagris gallopavo	XP_019478574.1	0.11
AEF06804.1	Meleagris gallopavo	XP_031411635.1	0.53
AEF06804.1	Meleagris gallopavo	XP_019473663.1	3.1
AEF06804.1	Meleagris gallopavo	XP_019473664.1	3.2
AEF06804.1	Meleagris gallopavo	XP_010727312.1	3.3
AEF06804.1	Meleagris gallopavo	XP_010713388.1	4
AEF06804.1	Meleagris gallopavo	XP_010713392.1	4.4
AEF06804.1	Meleagris gallopavo	XP_010712161.2	5.3
AEF06836.1	Meleagris gallopavo	XP_031407918.1	0.61
AEF06836.1	Meleagris gallopavo	XP_031412801.1	2
AEF06836.1	Meleagris gallopavo	XP_010722320.3	2
AEF06836.1	Meleagris gallopavo	XP_019478768.1	3.1
AEF06836.1	Meleagris gallopavo	XP_019469707.1	3.7
AEF06836.1	Meleagris gallopavo	XP_019469706.1	3.7
AEF06836.1	Meleagris gallopavo	XP_010707467.1	3.7
AEF06836.1	Meleagris gallopavo	XP_010707466.1	3.7
AEF06836.1	Meleagris gallopavo	XP_010707465.1	3.7
AEF06873.1	Meleagris gallopavo	XP_010712373.2	2.5
AEF06920.1	Meleagris gallopavo	XP_010721169.2	1.72e-06
AEF06920.1	Meleagris gallopavo	XP_019469085.1	2.6
AEF06920.1	Meleagris gallopavo	XP_010720521.1	4.4
AEF06920.1	Meleagris gallopavo	XP_010720522.1	4.5
AEF06947.1	Meleagris gallopavo	XP_019470381.1	0.042
AEF06947.1	Meleagris gallopavo	XP_031412112.1	2.4
AEF06947.1	Meleagris gallopavo	XP_031412115.1	4.3
AEF06947.1	Meleagris gallopavo	XP_031412114.1	4.9
AEF06947.1	Meleagris gallopavo	XP_019469940.1	8
AEF06958.1	Meleagris gallopavo	XP_031412593.1	0.09
AEF06958.1	Meleagris gallopavo	XP_003212499.1	1.3
AEF06958.1	Meleagris gallopavo	XP_019474033.1	2.3
AEF06958.1	Meleagris gallopavo	XP_031411754.1	2.5
AEF06958.1	Meleagris gallopavo	XP_010713878.1	2.8
AEF06958.1	Meleagris gallopavo	XP_010712567.1	6.7
AEF06958.1	Meleagris gallopavo	XP_010712569.1	6.7
AEF06964.1	Meleagris gallopavo	XP_019466635.2	4.86e-12
AEF06964.1	Meleagris gallopavo	XP_019466635.2	2.55e-10
AEF06964.1	Meleagris gallopavo	XP_019466635.2	6.51e-10
AEF06964.1	Meleagris gallopavo	XP_019466635.2	1.34e-09
AEF06964.1	Meleagris gallopavo	XP_019466635.2	1.82e-09
AEF06964.1	Meleagris gallopavo	XP_019466635.2	2.88e-09
AEF06964.1	Meleagris gallopavo	XP_019466635.2	4.42e-09
AEF06964.1	Meleagris gallopavo	XP_019466635.2	6.42e-09
AEF06964.1	Meleagris gallopavo	XP_019466635.2	8.18e-09
AEF06964.1	Meleagris gallopavo	XP_019466635.2	2.56e-08
AEF06964.1	Meleagris gallopavo	XP_031412599.1	1.53e-10
AEF06964.1	Meleagris gallopavo	XP_031412599.1	1.98e-05
AEF06964.1	Meleagris gallopavo	XP_031412599.1	4.52e-05
AEF06964.1	Meleagris gallopavo	XP_031412599.1	0.36
AEF06964.1	Meleagris gallopavo	XP_031412599.1	2.5
AEF06964.1	Meleagris gallopavo	XP_003212441.1	1.57e-10
AEF06964.1	Meleagris gallopavo	XP_003212441.1	1.87e-05
AEF06964.1	Meleagris gallopavo	XP_003212441.1	3.54e-05
AEF06964.1	Meleagris gallopavo	XP_003212441.1	0.29
AEF06964.1	Meleagris gallopavo	XP_003212441.1	1.7
AEF06964.1	Meleagris gallopavo	XP_010717990.1	0.45
AEF06964.1	Meleagris gallopavo	XP_010717989.1	0.46
AEF06964.1	Meleagris gallopavo	XP_003204753.1	0.56
AEF06964.1	Meleagris gallopavo	XP_019466290.1	0.69
AEF06964.1	Meleagris gallopavo	XP_010719732.1	2.9
AEF06964.1	Meleagris gallopavo	XP_003207269.1	5.7
AEF06964.1	Meleagris gallopavo	XP_031409813.1	6
AEF07017.1	Meleagris gallopavo	XP_031408896.1	0.032
AEF07017.1	Meleagris gallopavo	XP_019470114.1	0.032
AEF07017.1	Meleagris gallopavo	XP_031408898.1	0.49
AEF07017.1	Meleagris gallopavo	XP_031408897.1	0.5
AEF07017.1	Meleagris gallopavo	XP_003208765.1	4
AEF07017.1	Meleagris gallopavo	XP_010712525.2	7.2
AEF07018.1	Meleagris gallopavo	XP_003205768.1	6.7
AEF07078.1	Meleagris gallopavo	XP_019472950.1	0.69
AEF07078.1	Meleagris gallopavo	XP_010709067.1	1.2
AEF07078.1	Meleagris gallopavo	XP_010722677.1	1.3
AEF07078.1	Meleagris gallopavo	XP_019466870.1	4.6
AEF07078.1	Meleagris gallopavo	XP_031411245.1	5.2
AEF07117.1	Meleagris gallopavo	XP_010710676.1	0.24
AEF07117.1	Meleagris gallopavo	XP_019472695.1	0.88
AEF07117.1	Meleagris gallopavo	XP_019472696.1	1.2
AEF07117.1	Meleagris gallopavo	XP_031411806.1	1.8
AEF07117.1	Meleagris gallopavo	XP_031408630.1	2.1
AEF07117.1	Meleagris gallopavo	XP_010711987.1	3.2
AEF07117.1	Meleagris gallopavo	XP_019469302.1	5.9
AEF07117.1	Meleagris gallopavo	XP_010706681.1	6.1
AEF07117.1	Meleagris gallopavo	XP_019468899.1	6.2
AEF07117.1	Meleagris gallopavo	XP_019468997.1	7.2
AEF07120.1	Meleagris gallopavo	XP_019476862.1	0.16
AEF07120.1	Meleagris gallopavo	XP_010705150.1	1.5
AEF07120.1	Meleagris gallopavo	XP_031412292.1	1.6
AEF07120.1	Meleagris gallopavo	XP_031412293.1	1.6
AEF07120.1	Meleagris gallopavo	XP_031412289.1	1.6
AEF07120.1	Meleagris gallopavo	XP_031412290.1	1.6
AEF07157.1	Meleagris gallopavo	XP_010706850.1	3.1
AEF07157.1	Meleagris gallopavo	XP_031412195.1	7.8
AEF07157.1	Meleagris gallopavo	XP_031412194.1	7.8
AEF07157.1	Meleagris gallopavo	XP_019474881.1	8.7
AEF07157.1	Meleagris gallopavo	XP_003209342.2	8.7
AEF07313.1	Meleagris gallopavo	XP_010711003.1	0.88
AEF07313.1	Meleagris gallopavo	XP_010711003.1	4.3
AEF07339.1	Meleagris gallopavo	XP_010705402.1	0.62
AEF07339.1	Meleagris gallopavo	XP_010718949.1	5.5
AEF07339.1	Meleagris gallopavo	XP_019468209.1	6.8
AEF07339.1	Meleagris gallopavo	XP_003202025.1	7
AEF07339.1	Meleagris gallopavo	ACA64771.1	8.9
AEF07350.1	Meleagris gallopavo	XP_019468897.1	0.65
AEF07350.1	Meleagris gallopavo	XP_019468898.1	1.6
AEF07350.1	Meleagris gallopavo	XP_019476756.1	2.4
AEF07397.1	Meleagris gallopavo	XP_019478934.1	1.8
AEF07397.1	Meleagris gallopavo	XP_010721475.3	5.8
AEF07397.1	Meleagris gallopavo	XP_019477365.1	8.2
AEF07442.1	Meleagris gallopavo	XP_010704676.1	8
AEF07442.1	Meleagris gallopavo	XP_010704675.1	8.1
AEF07442.1	Meleagris gallopavo	XP_010704674.1	8.1
AEF07457.1	Meleagris gallopavo	XP_010708251.1	0.36
AEF07457.1	Meleagris gallopavo	XP_003205768.1	0.41
AEF07457.1	Meleagris gallopavo	XP_019473585.1	4.1
AEF07604.1	Meleagris gallopavo	XP_031409276.1	0.3
AEF07604.1	Meleagris gallopavo	XP_019468552.1	5.7
AEF07604.1	Meleagris gallopavo	XP_003205420.2	6.7
AEF07604.1	Meleagris gallopavo	XP_019469119.1	8
AEF07768.1	Meleagris gallopavo	XP_003205614.2	1.3
AEF07768.1	Meleagris gallopavo	XP_010717369.1	4.7
AEF07768.1	Meleagris gallopavo	XP_010721428.1	6.5
AEF07768.1	Meleagris gallopavo	XP_010721430.1	7
AEF07768.1	Meleagris gallopavo	XP_010721429.1	7.2
AEF07768.1	Meleagris gallopavo	XP_031412609.1	7.8
AEF07866.1	Meleagris gallopavo	XP_010717866.1	0.67
AEF08116.1	Meleagris gallopavo	XP_031411480.1	2.1
AEF08116.1	Meleagris gallopavo	XP_019475407.1	4.9
AEF08270.1	Meleagris gallopavo	XP_010723083.1	0.14
AEF08270.1	Meleagris gallopavo	XP_010720379.2	0.33
AEF08270.1	Meleagris gallopavo	XP_010709646.2	1.6
AEF08270.1	Meleagris gallopavo	XP_031408049.1	3
AEF08271.1	Meleagris gallopavo	XP_010722285.1	0.79
AEF08271.1	Meleagris gallopavo	XP_010722281.1	1.2
AEF08271.1	Meleagris gallopavo	XP_010722282.1	1.4
AEF08271.1	Meleagris gallopavo	XP_010722284.1	1.5
AEF08271.1	Meleagris gallopavo	XP_010722283.1	1.5
AEF08307.1	Meleagris gallopavo	XP_019478748.1	0.29
AEF08307.1	Meleagris gallopavo	XP_010723779.1	1.8
AEF08307.1	Meleagris gallopavo	XP_010723778.1	1.9
AEF08307.1	Meleagris gallopavo	XP_010715973.1	3.9
AEF08307.1	Meleagris gallopavo	XP_010708776.1	5.8
AEF08307.1	Meleagris gallopavo	XP_010708778.1	5.8
AEF08307.1	Meleagris gallopavo	XP_010708780.1	5.8
AEF08307.1	Meleagris gallopavo	XP_010708774.1	5.9
AEF08307.1	Meleagris gallopavo	XP_010708779.1	6
AEF08307.1	Meleagris gallopavo	XP_010708781.1	6
AEF08310.1	Meleagris gallopavo	XP_010710195.1	5.9
AEF08310.1	Meleagris gallopavo	XP_019465582.1	9.8
AEF08310.1	Meleagris gallopavo	XP_031412984.1	9.9
AEF08334.1	Meleagris gallopavo	XP_019469095.1	0.44
AEF08334.1	Meleagris gallopavo	XP_019475664.1	6.9
AEF08399.1	Meleagris gallopavo	XP_010705622.1	4.3
AEF08399.1	Meleagris gallopavo	XP_031408348.1	4.6
AEF08424.1	Meleagris gallopavo	XP_019467220.1	1.1
AEF08424.1	Meleagris gallopavo	XP_019467220.1	1.7
AEF08424.1	Meleagris gallopavo	XP_019467220.1	2.1
AEF08592.1	Meleagris gallopavo	XP_010705445.1	5.2
AEF08592.1	Meleagris gallopavo	XP_010705453.1	8.9
AEF08592.1	Meleagris gallopavo	XP_010705449.1	9.5
AEF08636.1	Meleagris gallopavo	XP_010716779.1	1.2
AEF08636.1	Meleagris gallopavo	XP_019475615.1	1.4
AEF08636.1	Meleagris gallopavo	XP_010715066.3	8.9
AEF08671.1	Meleagris gallopavo	XP_003206348.1	2.4
AEF08671.1	Meleagris gallopavo	XP_019473156.1	5.3
AEF08671.1	Meleagris gallopavo	XP_010712742.1	6.3
AEF08671.1	Meleagris gallopavo	XP_031410943.1	7
AEF08671.1	Meleagris gallopavo	XP_010707263.1	8.3
AEF08737.1	Meleagris gallopavo	XP_031411548.1	0.4
AEF08737.1	Meleagris gallopavo	XP_031411549.1	1.4
AEF08739.1	Meleagris gallopavo	XP_031411066.1	7.7
AEF08880.1	Meleagris gallopavo	XP_010710629.1	8.5
AEF08880.1	Meleagris gallopavo	XP_019471768.1	8.6
AEF08880.1	Meleagris gallopavo	XP_010712910.1	8.8
AEF08880.1	Meleagris gallopavo	XP_019471770.1	9
AEF08888.1	Meleagris gallopavo	XP_019477348.1	2.3
AEF08888.1	Meleagris gallopavo	XP_019470599.1	8.4
AEF08888.1	Meleagris gallopavo	XP_010708882.1	8.5
AEF08888.1	Meleagris gallopavo	XP_031412948.1	8.6
AEF09035.1	Meleagris gallopavo	XP_010715482.1	0.86
AEF09035.1	Meleagris gallopavo	XP_019478646.2	1.2
AEF09035.1	Meleagris gallopavo	XP_010724206.1	3.2
AEF09108.1	Meleagris gallopavo	XP_003211780.2	2.2
AEF09108.1	Meleagris gallopavo	XP_031411086.1	3.1
AEF09108.1	Meleagris gallopavo	XP_010718615.1	6.6
AEF09108.1	Meleagris gallopavo	XP_010714704.1	8.8
AEF09288.1	Meleagris gallopavo	XP_010722399.1	8.25e-19
AEF09288.1	Meleagris gallopavo	XP_010722399.1	0.001
AEF09288.1	Meleagris gallopavo	XP_010722398.1	8.64e-19
AEF09288.1	Meleagris gallopavo	XP_010722398.1	0.001
AEF09288.1	Meleagris gallopavo	XP_019478743.1	1.19e-18
AEF09288.1	Meleagris gallopavo	XP_019478743.1	0.001
AEF09288.1	Meleagris gallopavo	XP_010711136.1	3.64e-17
AEF09288.1	Meleagris gallopavo	XP_003202649.1	1.54e-16
AEF09288.1	Meleagris gallopavo	XP_031411459.1	2.05e-16
AEF09288.1	Meleagris gallopavo	XP_019477730.1	2.23e-16
AEF09288.1	Meleagris gallopavo	XP_010719051.1	1.86e-15
AEF09288.1	Meleagris gallopavo	XP_010719052.1	1.93e-15
AEF09288.1	Meleagris gallopavo	XP_010719050.1	2.08e-15
AEF09471.1	Meleagris gallopavo	XP_010710880.1	5.7
AEF09471.1	Meleagris gallopavo	XP_010710881.1	5.9
AEF09471.1	Meleagris gallopavo	XP_010719302.1	6.5
AEF09471.1	Meleagris gallopavo	XP_010719301.1	6.5
AEF09471.1	Meleagris gallopavo	XP_019477049.1	6.5
AEF09471.1	Meleagris gallopavo	XP_010719300.1	6.5
AEF09471.1	Meleagris gallopavo	XP_010719304.1	6.6
AEF09471.1	Meleagris gallopavo	XP_010719303.1	6.7
AEF09471.1	Meleagris gallopavo	XP_010719305.1	7.2
AEF09471.1	Meleagris gallopavo	XP_010713428.3	8.8
AEF09472.1	Meleagris gallopavo	XP_003203081.1	0.46
AEF09472.1	Meleagris gallopavo	XP_010724176.1	1.5
AEF09472.1	Meleagris gallopavo	XP_031409669.1	1.7
AEF09472.1	Meleagris gallopavo	XP_031408796.1	9.9
AEF09473.1	Meleagris gallopavo	XP_010711978.1	5.9
AEF09473.1	Meleagris gallopavo	XP_031408080.1	6.4
AEF09473.1	Meleagris gallopavo	XP_019474041.1	7.2
AEF09473.1	Meleagris gallopavo	XP_019474040.1	8.1
AEF09473.1	Meleagris gallopavo	XP_031410147.1	9.3
AEF09474.1	Meleagris gallopavo	XP_010711796.1	1.4
AEF09474.1	Meleagris gallopavo	XP_019471549.1	2.9
AEF09474.1	Meleagris gallopavo	XP_019471550.1	2.9
AEF09474.1	Meleagris gallopavo	XP_010711800.1	6.1
AEF09474.1	Meleagris gallopavo	XP_010711801.1	6.4
AEF09474.1	Meleagris gallopavo	XP_010706732.1	6.8
AEF09474.1	Meleagris gallopavo	XP_010722598.1	7.7
AEF09523.1	Meleagris gallopavo	XP_010721313.1	0.059
AEF09523.1	Meleagris gallopavo	XP_019467121.1	7.6
AEF09689.1	Meleagris gallopavo	XP_010726949.1	7.1
AEF09827.1	Meleagris gallopavo	XP_003206716.1	8.4
AEF10021.1	Meleagris gallopavo	XP_003211874.4	3.4
AEF10021.1	Meleagris gallopavo	XP_010720376.1	3.7
AEF10021.1	Meleagris gallopavo	XP_010720375.2	3.8
AEF10030.1	Meleagris gallopavo	XP_019477642.1	1.9
AEF10030.1	Meleagris gallopavo	XP_019475628.1	2.3
AEF10030.1	Meleagris gallopavo	XP_031412146.1	2.5
AEF10030.1	Meleagris gallopavo	XP_010716379.1	3.7
AEF10041.1	Meleagris gallopavo	XP_031408380.1	0.24
AEF10041.1	Meleagris gallopavo	XP_010712608.1	0.57
AEF10041.1	Meleagris gallopavo	XP_010724051.1	3.5
AEF10041.1	Meleagris gallopavo	XP_010704588.2	6.7
AEF10350.1	Meleagris gallopavo	XP_010710329.1	0.65
AEF10350.1	Meleagris gallopavo	XP_010710326.1	0.66
AEF10380.1	Meleagris gallopavo	XP_003211338.1	3.3
AEF10383.1	Meleagris gallopavo	XP_003205084.1	6.6
AEF10383.1	Meleagris gallopavo	XP_010714837.1	7.8
AEF10383.1	Meleagris gallopavo	XP_019473142.1	9.2
AEF10383.1	Meleagris gallopavo	XP_010712725.1	9.8
AEF10384.1	Meleagris gallopavo	XP_031410529.1	1.4
AEF10384.1	Meleagris gallopavo	XP_031410530.1	1.7
AEF10384.1	Meleagris gallopavo	XP_031410528.1	1.7
AEF10384.1	Meleagris gallopavo	XP_010713314.1	3.8
AEF06168.1	Meleagris gallopavo	XP_010712032.1	0.5
AEF06168.1	Meleagris gallopavo	XP_010708370.1	2.6
AEF06168.1	Meleagris gallopavo	XP_003205825.1	2.7
AEF06168.1	Meleagris gallopavo	XP_010708369.1	2.7
AEF06168.1	Meleagris gallopavo	XP_010724446.3	2.8
AEF06271.1	Meleagris gallopavo	XP_010706713.1	1.2
AEF06271.1	Meleagris gallopavo	XP_003213240.1	4
AEF06271.1	Meleagris gallopavo	XP_031409087.1	7
AEF06271.1	Meleagris gallopavo	XP_031410765.1	7.4
AEF06271.1	Meleagris gallopavo	XP_031410764.1	7.9
AEF06441.1	Meleagris gallopavo	XP_003210019.2	1.3
AEF06441.1	Meleagris gallopavo	XP_010707810.1	7.7
AEF06480.1	Meleagris gallopavo	XP_031411516.1	0.51
AEF06480.1	Meleagris gallopavo	XP_031410147.1	1.1
AEF06480.1	Meleagris gallopavo	XP_031412889.1	3.7
AEF06499.1	Meleagris gallopavo	XP_003207182.1	9.1
AEF06700.1	Meleagris gallopavo	XP_010716875.1	0.061
AEF06700.1	Meleagris gallopavo	XP_003209509.1	5.7
AEF06853.1	Meleagris gallopavo	XP_010714374.2	1.20e-09
AEF06853.1	Meleagris gallopavo	XP_031412631.1	0.001
AEF06853.1	Meleagris gallopavo	XP_010718685.1	0.12
AEF06853.1	Meleagris gallopavo	XP_003211747.1	0.18
AEF06853.1	Meleagris gallopavo	XP_010720480.2	7.7
AEF06919.1	Meleagris gallopavo	XP_010704997.1	3.2
AEF06919.1	Meleagris gallopavo	XP_010723226.1	4.5
AEF06919.1	Meleagris gallopavo	XP_010723225.1	4.5
AEF06919.1	Meleagris gallopavo	XP_031408479.1	8.3
AEF06919.1	Meleagris gallopavo	XP_010706312.1	9.2
AEF07006.1	Meleagris gallopavo	XP_010717016.2	9.9
AEF07198.1	Meleagris gallopavo	XP_019476463.1	3.6
AEF07299.1	Meleagris gallopavo	XP_031408310.1	8.20e-42
AEF07299.1	Meleagris gallopavo	XP_031410494.1	0.64
AEF07299.1	Meleagris gallopavo	XP_010716723.1	1.2
AEF07299.1	Meleagris gallopavo	XP_010715030.2	1.7
AEF07299.1	Meleagris gallopavo	XP_010715030.2	8.5
AEF07299.1	Meleagris gallopavo	XP_003208169.2	4.2
AEF07299.1	Meleagris gallopavo	XP_010706468.2	4.8
AEF07365.1	Meleagris gallopavo	XP_019473513.1	2.1
AEF07365.1	Meleagris gallopavo	XP_010715971.1	2.1
AEF07365.1	Meleagris gallopavo	XP_010715991.1	2.2
AEF07365.1	Meleagris gallopavo	XP_010716002.1	2.3
AEF07365.1	Meleagris gallopavo	XP_010716009.1	2.3
AEF07365.1	Meleagris gallopavo	XP_031409409.1	8.8
AEF07365.1	Meleagris gallopavo	XP_010714638.1	9
AEF07875.1	Meleagris gallopavo	XP_010706953.2	1.3
AEF07875.1	Meleagris gallopavo	XP_003206192.2	4.3
AEF07875.1	Meleagris gallopavo	XP_010709033.1	7.3
AEF07875.1	Meleagris gallopavo	XP_031409259.1	7.7
AEF07875.1	Meleagris gallopavo	XP_010709032.1	7.7
AEF07875.1	Meleagris gallopavo	XP_003206153.1	7.8
AEF07875.1	Meleagris gallopavo	XP_031409258.1	8.2
AEF07875.1	Meleagris gallopavo	XP_010709030.1	8.2
AEF07875.1	Meleagris gallopavo	XP_031409257.1	8.3
AEF07875.1	Meleagris gallopavo	XP_010709028.1	8.7
AEF07926.1	Meleagris gallopavo	XP_010710166.2	8.78e-14
AEF07926.1	Meleagris gallopavo	XP_010710166.2	2.69e-08
AEF07926.1	Meleagris gallopavo	XP_010710166.2	5.23e-04
AEF07926.1	Meleagris gallopavo	XP_010710166.2	5.28e-04
AEF07926.1	Meleagris gallopavo	XP_010710166.2	0.021
AEF07926.1	Meleagris gallopavo	XP_010710166.2	0.23
AEF07926.1	Meleagris gallopavo	XP_010710166.2	1.5
AEF07926.1	Meleagris gallopavo	XP_031411507.1	2.23e-04
AEF07926.1	Meleagris gallopavo	XP_031411507.1	0.002
AEF07926.1	Meleagris gallopavo	XP_031411507.1	0.005
AEF07926.1	Meleagris gallopavo	XP_010707808.2	0.023
AEF07926.1	Meleagris gallopavo	XP_010707808.2	7
AEF07926.1	Meleagris gallopavo	XP_003208919.1	0.032
AEF07926.1	Meleagris gallopavo	XP_010708624.1	0.048
AEF07926.1	Meleagris gallopavo	XP_010708624.1	6.6
AEF07926.1	Meleagris gallopavo	XP_031408978.1	0.2
AEF07926.1	Meleagris gallopavo	XP_010708089.1	0.73
AEF07926.1	Meleagris gallopavo	XP_010718660.1	1.4
AEF07926.1	Meleagris gallopavo	XP_010718659.1	1.4
AEF08065.1	Meleagris gallopavo	XP_010723943.1	1.7
AEF08065.1	Meleagris gallopavo	NP_001290130.1	2.7
AEF08065.1	Meleagris gallopavo	XP_003206530.2	7.6
AEF08065.1	Meleagris gallopavo	XP_003207821.1	9.5
AEF08066.1	Meleagris gallopavo	XP_010725137.1	0.59
AEF08066.1	Meleagris gallopavo	XP_019469803.2	0.64
AEF08066.1	Meleagris gallopavo	XP_019466062.1	1
AEF08173.1	Meleagris gallopavo	XP_010727143.1	2
AEF08173.1	Meleagris gallopavo	XP_010714009.1	7.8
AEF08431.1	Meleagris gallopavo	XP_010707597.1	4.3
AEF08431.1	Meleagris gallopavo	XP_003205325.1	4.5
AEF08431.1	Meleagris gallopavo	XP_010718233.1	5.4
AEF08431.1	Meleagris gallopavo	XP_003210883.1	5.7
AEF08506.1	Meleagris gallopavo	XP_031412153.1	4.6
AEF08883.1	Meleagris gallopavo	XP_010708885.1	3.9
AEF08883.1	Meleagris gallopavo	XP_010718076.2	7.1
AEF08883.1	Meleagris gallopavo	XP_010717080.1	7.2
AEF08883.1	Meleagris gallopavo	XP_019473582.1	7.4
AEF08883.1	Meleagris gallopavo	XP_010723234.1	9.8
AEF08915.1	Meleagris gallopavo	XP_003209052.1	3.1
AEF08915.1	Meleagris gallopavo	XP_019470209.1	3.4
AEF08915.1	Meleagris gallopavo	XP_003205563.1	3.5
AEF08915.1	Meleagris gallopavo	XP_031407979.1	4.5
AEF09385.1	Meleagris gallopavo	XP_010718606.2	1.59e-70
AEF09385.1	Meleagris gallopavo	XP_019477617.1	3.27e-65
AEF09385.1	Meleagris gallopavo	XP_010718609.2	6.13e-31
AEF09385.1	Meleagris gallopavo	XP_010718607.1	7.30e-18
AEF09385.1	Meleagris gallopavo	XP_010718605.1	2.54e-08
AEF09385.1	Meleagris gallopavo	XP_010723286.1	1.4
AEF09385.1	Meleagris gallopavo	XP_010708226.1	1.6
AEF09385.1	Meleagris gallopavo	XP_010708228.1	1.6
AEF09385.1	Meleagris gallopavo	XP_010708224.1	1.7
AEF09385.1	Meleagris gallopavo	XP_010708227.1	1.7
AEF09863.1	Meleagris gallopavo	XP_019473416.1	2
AEF09863.1	Meleagris gallopavo	XP_031410392.1	2.4
AEF09863.1	Meleagris gallopavo	XP_010723246.1	3.4
AEF09863.1	Meleagris gallopavo	XP_010723245.1	3.4
AEF09863.1	Meleagris gallopavo	XP_010723244.1	4.1
AEF10024.1	Meleagris gallopavo	XP_031409935.1	2.5
AEF10024.1	Meleagris gallopavo	XP_010706503.1	5.1
AEF10024.1	Meleagris gallopavo	XP_019465487.1	5.6
AEF10148.1	Meleagris gallopavo	XP_019478574.1	0.019
AEF10148.1	Meleagris gallopavo	XP_031410423.1	0.02
AEF10148.1	Meleagris gallopavo	XP_019470640.1	0.34
AEF10148.1	Meleagris gallopavo	XP_031409162.1	1
AEF10148.1	Meleagris gallopavo	XP_031410560.1	2.9
AEF10148.1	Meleagris gallopavo	XP_019473839.1	3
AEF10148.1	Meleagris gallopavo	XP_031410562.1	3.1
AEF10148.1	Meleagris gallopavo	XP_019476025.2	6.1
AEF10148.1	Meleagris gallopavo	XP_019477244.1	6.3
AEF10148.1	Meleagris gallopavo	XP_019477243.1	6.3
AEF10232.1	Meleagris gallopavo	XP_010711057.1	0.32
AEF10232.1	Meleagris gallopavo	XP_019466572.1	0.42
AEF10232.1	Meleagris gallopavo	XP_019467498.1	2.9
AEF10232.1	Meleagris gallopavo	XP_031408258.1	4.9
AEF10232.1	Meleagris gallopavo	XP_019472829.1	5.7
AEF10334.1	Meleagris gallopavo	XP_010723323.1	1.4
AEF10334.1	Meleagris gallopavo	XP_010721681.1	1.6
AEF10361.1	Meleagris gallopavo	XP_019474991.1	4
AEF10361.1	Meleagris gallopavo	XP_019474990.1	4.5
AEF10361.1	Meleagris gallopavo	XP_010723683.2	9.3
AEF10364.1	Meleagris gallopavo	XP_010721313.1	1.5
AEF10364.1	Meleagris gallopavo	XP_031410492.1	2.2
AEF10364.1	Meleagris gallopavo	XP_010711803.1	8.3
AEF10364.1	Meleagris gallopavo	XP_019469993.1	8.3
AEF10364.1	Meleagris gallopavo	XP_010721167.1	9.8
AEF10382.1	Meleagris gallopavo	XP_019472103.1	0.11
AEF10382.1	Meleagris gallopavo	XP_031409822.1	0.11
AEF10382.1	Meleagris gallopavo	XP_019468285.1	2.3
AEF10382.1	Meleagris gallopavo	XP_019468287.1	2.3
AEF10382.1	Meleagris gallopavo	XP_010705135.1	2.4
AEF10382.1	Meleagris gallopavo	XP_010705137.1	2.4
AEF10382.1	Meleagris gallopavo	XP_019468286.1	2.4
AEF10382.1	Meleagris gallopavo	XP_010705138.1	2.4
AEF10382.1	Meleagris gallopavo	XP_019468282.1	2.5
AEF10382.1	Meleagris gallopavo	XP_019468284.1	2.6
AEF05955.1	Mus musculus	XP_036020442.1	0.15
AEF05955.1	Mus musculus	XP_006538438.1	0.15
AEF05955.1	Mus musculus	NP_001355550.1	0.15
AEF05955.1	Mus musculus	Q8BLI0.2	0.16
AEF05955.1	Mus musculus	XP_006538441.1	0.16
AEF05955.1	Mus musculus	XP_006538439.1	0.16
AEF05955.1	Mus musculus	NP_084243.3	0.16
AEF05955.1	Mus musculus	XP_036020443.1	0.16
AEF05955.1	Mus musculus	XP_006538442.1	0.17
AEF05955.1	Mus musculus	BAE21159.1	0.19
AEF05957.1	Mus musculus	XP_006525870.1	2.1
AEF05957.1	Mus musculus	EDL23017.1	2.2
AEF05957.1	Mus musculus	XP_036016981.1	2.2
AEF05957.1	Mus musculus	XP_006525869.1	2.2
AEF05957.1	Mus musculus	NP_001139770.1	2.2
AEF05957.1	Mus musculus	BAD32552.1	2.5
AEF05957.1	Mus musculus	XP_017173355.1	2.8
AEF05959.1	Mus musculus	BAE33495.1	6
AEF05959.1	Mus musculus	AAB04099.1	6
AEF05959.1	Mus musculus	NP_001156808.1	6.1
AEF05959.1	Mus musculus	NP_001156809.1	6.5
AEF05959.1	Mus musculus	EDL12703.1	6.6
AEF05959.1	Mus musculus	BAC40903.1	6.7
AEF05959.1	Mus musculus	NP_058025.2	6.7
AEF05959.1	Mus musculus	AAB04098.1	6.7
AEF05959.1	Mus musculus	EDL12702.1	7.3
AEF06112.1	Mus musculus	AAB48761.1	0.005
AEF06112.1	Mus musculus	AAB48724.1	0.01
AEF06112.1	Mus musculus	AJF83853.1	0.02
AEF06112.1	Mus musculus	AAA21367.1	0.023
AEF06112.1	Mus musculus	AAD34805.1	0.026
AEF06112.1	Mus musculus	AAR11040.1	0.026
AEF06112.1	Mus musculus	AEQ62439.1	0.028
AEF06112.1	Mus musculus	CAA80005.1	0.029
AEF06112.1	Mus musculus	AAT81540.1	0.029
AEF06112.1	Mus musculus	AAA38760.1	0.03
AEF06130.1	Mus musculus	XP_006521946.1	3.7
AEF06130.1	Mus musculus	NP_001032398.1	3.8
AEF06130.1	Mus musculus	BAD90432.1	3.8
AEF06144.1	Mus musculus	BAC41168.1	5.57e-45
AEF06144.1	Mus musculus	AAH13516.1	6.65e-45
AEF06144.1	Mus musculus	BAE21071.1	2.08e-44
AEF06144.1	Mus musculus	NP_062510.2	2.10e-44
AEF06144.1	Mus musculus	AAD49422.1	2.34e-43
AEF06144.1	Mus musculus	EDL37491.1	8.56e-43
AEF06144.1	Mus musculus	EDL37491.1	0.17
AEF06144.1	Mus musculus	NP_084403.2	1.32e-42
AEF06144.1	Mus musculus	NP_084403.2	0.052
AEF06144.1	Mus musculus	NP_001074656.1	2.29e-42
AEF06144.1	Mus musculus	NP_001074656.1	5.3
AEF06144.1	Mus musculus	XP_030110768.1	2.60e-42
AEF06144.1	Mus musculus	XP_030110768.1	0.045
AEF06144.1	Mus musculus	XP_006504249.1	4.80e-42
AEF06144.1	Mus musculus	XP_006504249.1	0.05
AEF06159.1	Mus musculus	NP_848729.1	3.29e-09
AEF06159.1	Mus musculus	BAE36358.1	4.09e-09
AEF06159.1	Mus musculus	BAE39833.1	7.32e-09
AEF06159.1	Mus musculus	BAE35333.1	2.27e-08
AEF06160.1	Mus musculus	BAD32426.1	2.5
[truncated: 1,076 more rows]

## Sheet: Accession Numbers Table 3
Accession Table 3: NCBI accessions of proteins from target Salmonella enterica subspecies enterica serovars proteins remotely analyzed for protein positive homology to query proteins
Query NCBI Protein Accession Number1	Entrez Query Salmonella enterica subspecies enterica serovar2	Subject NCBI Protein Accession Number	Sequence Identity (%)
AEF05955.1	Enteritidis	WP_000743357.1	100
AEF05955.1	Enteritidis	EBL6454401.1	99.444
AEF05955.1	Enteritidis	MCL8637430.1	99.444
AEF05955.1	Enteritidis	MCL8900369.1	99.444
AEF05955.1	Enteritidis	ECD1634899.1	99.444
AEF05955.1	Enteritidis	EDD5583125.1	99.444
AEF05955.1	Enteritidis	EDH4006103.1	99.444
AEF05955.1	Enteritidis	MCL9478314.1	99.444
AEF05955.1	Enteritidis	WP_080187254.1	99.444
AEF05955.1	Enteritidis	EBX9461748.1	99.444
AEF05956.1	Enteritidis	WP_000742551.1	100
AEF05956.1	Enteritidis	ECS6192302.1	99.561
AEF05956.1	Enteritidis	EBW8667616.1	99.561
AEF05956.1	Enteritidis	EBS0923871.1	99.561
AEF05956.1	Enteritidis	EEN5246224.1	99.561
AEF05956.1	Enteritidis	EDJ3510062.1	99.561
AEF05956.1	Enteritidis	EDD0347320.1	99.561
AEF05956.1	Enteritidis	WP_000739906.1	99.561
AEF05956.1	Enteritidis	WP_000742558.1	99.561
AEF05956.1	Enteritidis	WP_022742592.1	99.561
AEF05957.1	Enteritidis	EAY3452373.1	100
AEF05957.1	Enteritidis	EEC4431864.1	99.885
AEF05957.1	Enteritidis	EDI3964409.1	99.885
AEF05957.1	Enteritidis	MCL8664080.1	99.885
AEF05957.1	Enteritidis	WP_022742593.1	99.885
AEF05957.1	Enteritidis	EBW0390773.1	99.656
AEF05957.1	Enteritidis	EBQ8891072.1	99.885
AEF05957.1	Enteritidis	WP_099800557.1	99.656
AEF05957.1	Enteritidis	ECM8137757.1	99.771
AEF05957.1	Enteritidis	EGW2795187.1	99.656
AEF05959.1	Enteritidis	WP_001082039.1	100
AEF05959.1	Enteritidis	WP_001082038.1	99.448
AEF05959.1	Enteritidis	EDD5396223.1	99.448
AEF05959.1	Enteritidis	EDC7195783.1	98.895
AEF05959.1	Enteritidis	EEB2107069.1	98.895
AEF05959.1	Enteritidis	EBY8510529.1	98.895
AEF05959.1	Enteritidis	EEN6975402.1	98.895
AEF05959.1	Enteritidis	EDD5583121.1	98.343
AEF05959.1	Enteritidis	EBW6086783.1	99.448
AEF05959.1	Enteritidis	EBH2712946.1	98.895
AEF05960.1	Enteritidis	WP_001243232.1	100
AEF05960.1	Enteritidis	WP_135415823.1	99.419
AEF05960.1	Enteritidis	WP_001243239.1	99.419
AEF05960.1	Enteritidis	WP_192513668.1	99.419
AEF05960.1	Enteritidis	EDF6194281.1	99.419
AEF05960.1	Enteritidis	EDA7866616.1	99.419
AEF05960.1	Enteritidis	EHH0398382.1	99.419
AEF05960.1	Enteritidis	EBA1417733.1	99.419
AEF05960.1	Enteritidis	EBQ8891069.1	99.419
AEF05960.1	Enteritidis	EHC5508123.1	99.419
AEF06109.1	Enteritidis	WP_000794043.1	100
AEF06109.1	Enteritidis	WP_000794042.1	99.721
AEF06109.1	Enteritidis	MCL8933462.1	99.721
AEF06109.1	Enteritidis	EBQ8892392.1	99.721
AEF06109.1	Enteritidis	EBH2713959.1	99.721
AEF06109.1	Enteritidis	MCL8666560.1	99.721
AEF06109.1	Enteritidis	EBW7490173.1	99.721
AEF06109.1	Enteritidis	WP_000794041.1	99.443
AEF06109.1	Enteritidis	EDD5835155.1	99.443
AEF06109.1	Enteritidis	HAB4953975.1	99.164
AEF06110.1	Enteritidis	WP_001231776.1	100
AEF06110.1	Enteritidis	EDE3782056.1	99.882
AEF06110.1	Enteritidis	HAE0158626.1	99.882
AEF06110.1	Enteritidis	ECV7031429.1	99.882
AEF06110.1	Enteritidis	ECX3333083.1	99.882
AEF06110.1	Enteritidis	MCL8656937.1	99.882
AEF06110.1	Enteritidis	ECT6972688.1	99.41
AEF06110.1	Enteritidis	EBW7490172.1	99.41
AEF06110.1	Enteritidis	EDE9384364.1	99.41
AEF06110.1	Enteritidis	HAC6524445.1	99.41
AEF06111.1	Enteritidis	EGS2296799.1	100
AEF06111.1	Enteritidis	WP_001086408.1	99.559
AEF06111.1	Enteritidis	EAZ9451931.1	99.119
AEF06111.1	Enteritidis	EBA1417574.1	99.119
AEF06111.1	Enteritidis	ECM8138770.1	99.119
AEF06111.1	Enteritidis	WP_001086409.1	99.119
AEF06111.1	Enteritidis	WP_001086410.1	99.119
AEF06111.1	Enteritidis	EBK2662663.1	99.559
AEF06111.1	Enteritidis	EBM9778665.1	99.119
AEF06111.1	Enteritidis	WP_001086403.1	99.119
AEF06112.1	Enteritidis	WP_000777532.1	100
AEF06112.1	Enteritidis	WP_000777533.1	99.441
AEF06112.1	Enteritidis	HAC6524443.1	99.441
AEF06112.1	Enteritidis	EDB4449867.1	98.883
AEF06112.1	Enteritidis	EDE0305990.1	99.441
AEF06112.1	Enteritidis	WP_000777534.1	99.441
AEF06112.1	Enteritidis	EAZ9451930.1	98.324
AEF06112.1	Enteritidis	MCL8980064.1	98.324
AEF06112.1	Enteritidis	EEE8088301.1	98.883
AEF06112.1	Enteritidis	WP_000777530.1	98.883
AEF06126.1	Enteritidis	WP_000113220.1	100
AEF06126.1	Enteritidis	ECU0231200.1	99.863
AEF06126.1	Enteritidis	ECX1953069.1	99.863
AEF06126.1	Enteritidis	WP_000113218.1	99.863
AEF06126.1	Enteritidis	MCL8661675.1	99.863
AEF06126.1	Enteritidis	WP_022742604.1	99.863
AEF06126.1	Enteritidis	WP_000113219.1	99.863
AEF06126.1	Enteritidis	MCL9193438.1	99.863
AEF06126.1	Enteritidis	ECQ4040928.1	99.863
AEF06126.1	Enteritidis	EBW7490156.1	99.726
AEF06130.1	Enteritidis	WP_001090554.1	100
AEF06130.1	Enteritidis	WP_001090553.1	99.462
AEF06130.1	Enteritidis	EDM7278972.1	99.462
AEF06130.1	Enteritidis	ECZ7819105.1	99.462
AEF06130.1	Enteritidis	EBX9042622.1	99.462
AEF06130.1	Enteritidis	EBW8617878.1	99.462
AEF06130.1	Enteritidis	EBA0170740.1	98.925
AEF06130.1	Enteritidis	WP_001090556.1	98.925
AEF06130.1	Enteritidis	EDC7375638.1	98.925
AEF06130.1	Enteritidis	HBZ8569167.1	99.462
AEF06144.1	Enteritidis	WP_000753958.1	100
AEF06144.1	Enteritidis	EDY7218684.1	99.789
AEF06144.1	Enteritidis	WP_138010615.1	99.789
AEF06144.1	Enteritidis	ECM4588945.1	99.789
AEF06144.1	Enteritidis	EBH2714066.1	99.789
AEF06144.1	Enteritidis	EBA0170726.1	99.789
AEF06144.1	Enteritidis	WP_023249768.1	99.789
AEF06144.1	Enteritidis	EBR8207051.1	99.789
AEF06144.1	Enteritidis	ECM0313560.1	99.789
AEF06144.1	Enteritidis	EBY3895617.1	99.789
AEF06159.1	Enteritidis	WP_001240935.1	100
AEF06159.1	Enteritidis	EBQ8894125.1	99.876
AEF06159.1	Enteritidis	WP_001240929.1	99.876
AEF06159.1	Enteritidis	ECU7293653.1	99.751
AEF06159.1	Enteritidis	WP_096098615.1	99.751
AEF06159.1	Enteritidis	EDC6204436.1	99.751
AEF06159.1	Enteritidis	EDX6005275.1	99.751
AEF06159.1	Enteritidis	MCL9110452.1	99.876
AEF06159.1	Enteritidis	EDL0361767.1	99.751
AEF06159.1	Enteritidis	EHB5149753.1	99.751
AEF06160.1	Enteritidis	WP_000758966.1	100
AEF06160.1	Enteritidis	EDH0184366.1	99.379
AEF06160.1	Enteritidis	ECB0999204.1	99.379
AEF06160.1	Enteritidis	EEF1411588.1	99.379
AEF06160.1	Enteritidis	EDV2519239.1	99.379
AEF06160.1	Enteritidis	HAC6042794.1	99.379
AEF06160.1	Enteritidis	EBQ5961927.1	99.379
AEF06160.1	Enteritidis	HCK5445417.1	99.379
AEF06160.1	Enteritidis	EBM0636832.1	99.379
AEF06160.1	Enteritidis	EDK6717228.1	99.379
AEF06168.1	Enteritidis	EPI68903.1	100
AEF06168.1	Enteritidis	WP_000524168.1	100
AEF06168.1	Enteritidis	EBV8560256.1	99.83
AEF06168.1	Enteritidis	EDF6193886.1	99.83
AEF06168.1	Enteritidis	EBA1417510.1	99.83
AEF06168.1	Enteritidis	ECI0951473.1	99.83
AEF06168.1	Enteritidis	EDD0341135.1	99.83
AEF06168.1	Enteritidis	ECS2851133.1	99.83
AEF06168.1	Enteritidis	EBQ8894116.1	99.83
AEF06168.1	Enteritidis	WP_000524167.1	99.83
AEF06179.1	Enteritidis	WP_001202315.1	100
AEF06179.1	Enteritidis	WP_069057630.1	99.254
AEF06179.1	Enteritidis	WP_079898505.1	99.254
AEF06179.1	Enteritidis	WP_076915252.1	99.254
AEF06179.1	Enteritidis	EBS5562583.1	99.254
AEF06179.1	Enteritidis	ECN9992560.1	99.254
AEF06179.1	Enteritidis	HAE0746633.1	99.254
AEF06179.1	Enteritidis	EDC0778284.1	99.254
AEF06179.1	Enteritidis	EDV6015645.1	99.254
AEF06179.1	Enteritidis	EBW7260172.1	99.254
AEF06208.1	Enteritidis	WP_000119443.1	100
AEF06208.1	Enteritidis	MCL9530620.1	99.379
AEF06208.1	Enteritidis	ECM3702214.1	99.379
AEF06208.1	Enteritidis	EBV2579541.1	99.379
AEF06208.1	Enteritidis	EDA9718134.1	99.379
AEF06208.1	Enteritidis	WP_000119439.1	99.379
AEF06208.1	Enteritidis	MCL8903422.1	98.758
AEF06208.1	Enteritidis	ECI2304169.1	98.758
AEF06208.1	Enteritidis	EBA0152717.1	99.379
AEF06208.1	Enteritidis	EHW4331575.1	98.758
AEF06232.1	Enteritidis	WP_001535430.1	100
AEF06232.1	Enteritidis	EBA0168148.1	99.578
AEF06232.1	Enteritidis	EEB1771308.1	99.156
AEF06232.1	Enteritidis	EEA2673052.1	98.734
AEF06232.1	Enteritidis	EBS3357353.1	91.561
AEF06232.1	Enteritidis	WP_001676318.1	91.561
AEF06232.1	Enteritidis	ALG56201.1	91.561
AEF06232.1	Enteritidis	WP_069057524.1	91.139
AEF06232.1	Enteritidis	EDL0812204.1	91.139
AEF06232.1	Enteritidis	WP_016770435.1	91.139
AEF06233.1	Enteritidis	ECS6107298.1	99.88
AEF06233.1	Enteritidis	WP_000669634.1	100
AEF06233.1	Enteritidis	EDE3779408.1	99.88
AEF06233.1	Enteritidis	ECT6973669.1	99.88
AEF06233.1	Enteritidis	MCL9014463.1	99.88
AEF06233.1	Enteritidis	EEC4429644.1	99.88
AEF06233.1	Enteritidis	WP_000669636.1	99.522
AEF06233.1	Enteritidis	EDD5396681.1	99.402
AEF06233.1	Enteritidis	ECD1638143.1	99.282
AEF06233.1	Enteritidis	EBQ8894331.1	99.163
AEF06234.1	Enteritidis	WP_000266939.1	100
AEF06234.1	Enteritidis	MCL9615944.1	99.359
AEF06234.1	Enteritidis	EBR9490712.1	99.359
AEF06234.1	Enteritidis	ECI2485749.1	99.359
AEF06234.1	Enteritidis	ECK2139006.1	99.359
AEF06234.1	Enteritidis	EBR9632721.1	99.359
AEF06234.1	Enteritidis	MCL9103511.1	98.077
AEF06234.1	Enteritidis	WP_023231370.1	98.718
AEF06234.1	Enteritidis	WP_080083153.1	98.077
AEF06234.1	Enteritidis	ECT6973668.1	98.077
AEF06253.1	Enteritidis	WP_001043675.1	100
AEF06253.1	Enteritidis	MCL8839731.1	99.714
AEF06253.1	Enteritidis	EIL1353849.1	99.714
AEF06253.1	Enteritidis	EPI69694.1	99.714
AEF06253.1	Enteritidis	EHN9709732.1	99.714
AEF06253.1	Enteritidis	WP_001043667.1	99.714
AEF06253.1	Enteritidis	MCL9615927.1	99.429
AEF06253.1	Enteritidis	EDB6272051.1	99.429
AEF06253.1	Enteritidis	EEN3031246.1	99.429
AEF06253.1	Enteritidis	EDM2005985.1	99.429
AEF06269.1	Enteritidis	EBB4918589.1	100
AEF06269.1	Enteritidis	EBH2524562.1	99.883
AEF06269.1	Enteritidis	WP_000075342.1	99.649
AEF06269.1	Enteritidis	MCL8667734.1	99.532
AEF06269.1	Enteritidis	ECV7031392.1	99.532
AEF06269.1	Enteritidis	EEC3069898.1	99.532
AEF06269.1	Enteritidis	EBR9489976.1	99.415
AEF06269.1	Enteritidis	MCL8678085.1	99.415
AEF06269.1	Enteritidis	MCL9480725.1	99.298
AEF06269.1	Enteritidis	EDD5437396.1	99.298
AEF06271.1	Enteritidis	WP_000062035.1	100
AEF06271.1	Enteritidis	EIE5304982.1	99.438
AEF06271.1	Enteritidis	WP_080199201.1	99.438
AEF06271.1	Enteritidis	EBW2214112.1	99.438
AEF06271.1	Enteritidis	WP_038424358.1	99.438
AEF06271.1	Enteritidis	EDZ8911334.1	99.438
AEF06271.1	Enteritidis	EDD5437394.1	99.438
AEF06271.1	Enteritidis	MCL8993287.1	99.438
AEF06271.1	Enteritidis	WP_000062033.1	99.438
AEF06271.1	Enteritidis	EBR9166572.1	99.438
AEF06277.1	Enteritidis	EBB4918581.1	100
AEF06277.1	Enteritidis	WP_000830237.1	99.425
AEF06277.1	Enteritidis	EBV8558718.1	98.851
AEF06277.1	Enteritidis	EBK2662030.1	98.851
AEF06277.1	Enteritidis	EEK6740070.1	98.851
AEF06277.1	Enteritidis	WP_000830239.1	98.851
AEF06277.1	Enteritidis	EBM0680077.1	98.851
AEF06277.1	Enteritidis	EDC7951694.1	98.851
AEF06277.1	Enteritidis	EDE0494669.1	98.851
AEF06277.1	Enteritidis	EDX6001545.1	98.851
AEF06295.1	Enteritidis	WP_001127725.1	100
AEF06295.1	Enteritidis	WP_001127733.1	99.715
AEF06295.1	Enteritidis	MCL8932606.1	99.858
AEF06295.1	Enteritidis	MCL8913368.1	99.858
AEF06295.1	Enteritidis	EDO3119954.1	99.858
AEF06295.1	Enteritidis	WP_001127724.1	99.858
AEF06295.1	Enteritidis	EBL6453394.1	99.715
AEF06295.1	Enteritidis	EBK2662012.1	99.715
AEF06295.1	Enteritidis	EEN5246683.1	99.43
AEF06295.1	Enteritidis	EHW2445036.1	99.715
AEF06344.1	Enteritidis	ELO84430.1	100
AEF06344.1	Enteritidis	WP_000752021.1	100
AEF06344.1	Enteritidis	HAB1155055.1	99.652
AEF06344.1	Enteritidis	WP_135415794.1	99.652
AEF06344.1	Enteritidis	HAB1695182.1	99.652
AEF06344.1	Enteritidis	EDD6928775.1	99.652
AEF06344.1	Enteritidis	ECE7780673.1	99.652
AEF06344.1	Enteritidis	HAW6512823.1	99.652
AEF06344.1	Enteritidis	HAC6040240.1	99.652
AEF06344.1	Enteritidis	MBD6626123.1	99.652
AEF06441.1	Enteritidis	ELO54876.1	100
AEF06441.1	Enteritidis	WP_000152869.1	100
AEF06441.1	Enteritidis	HBZ8662454.1	99.735
AEF06441.1	Enteritidis	EGX4180852.1	99.735
AEF06441.1	Enteritidis	EBA0153277.1	99.735
AEF06441.1	Enteritidis	EBM0682870.1	99.735
AEF06441.1	Enteritidis	EDD5398969.1	99.735
AEF06441.1	Enteritidis	HAE0157431.1	99.735
AEF06441.1	Enteritidis	HAB1253158.1	99.735
AEF06441.1	Enteritidis	EED3694869.1	99.735
AEF06475.1	Enteritidis	WP_000681030.1	100
AEF06475.1	Enteritidis	HAE0157398.1	99.459
AEF06475.1	Enteritidis	MCL8660832.1	99.459
AEF06475.1	Enteritidis	MCL8932430.1	99.459
AEF06475.1	Enteritidis	WP_000681032.1	98.919
AEF06475.1	Enteritidis	EBN0191725.1	98.919
AEF06475.1	Enteritidis	WP_000681035.1	98.919
AEF06475.1	Enteritidis	EEC4432217.1	99.459
AEF06475.1	Enteritidis	WP_000681034.1	98.378
AEF06475.1	Enteritidis	WP_000681031.1	98.378
AEF06478.1	Enteritidis	WP_000754233.1	100
AEF06478.1	Enteritidis	MCL9005384.1	99.885
AEF06478.1	Enteritidis	EDE1784020.1	99.885
AEF06478.1	Enteritidis	MCL8646913.1	99.885
AEF06478.1	Enteritidis	EHW4331341.1	99.54
AEF06478.1	Enteritidis	MCL8677898.1	99.425
AEF06478.1	Enteritidis	WP_000754232.1	99.425
AEF06478.1	Enteritidis	EBK2663307.1	99.425
AEF06478.1	Enteritidis	WP_000754220.1	99.425
AEF06478.1	Enteritidis	EIL1353338.1	99.425
AEF06480.1	Enteritidis	WP_000603405.1	100
AEF06480.1	Enteritidis	EBA0153312.1	99.419
AEF06480.1	Enteritidis	ECI2488815.1	99.419
AEF06480.1	Enteritidis	WP_000577507.1	99.419
AEF06480.1	Enteritidis	EBU6655936.1	99.419
AEF06480.1	Enteritidis	ECI2498802.1	98.837
AEF06480.1	Enteritidis	EDD5398950.1	99.419
AEF06480.1	Enteritidis	EDE4851994.1	98.837
AEF06480.1	Enteritidis	ECI2485443.1	98.837
AEF06480.1	Enteritidis	EBZ8473727.1	98.837
AEF06499.1	Enteritidis	EDD4263615.1	100
AEF06499.1	Enteritidis	WP_000192437.1	99.848
AEF06499.1	Enteritidis	EAY3453426.1	99.695
AEF06499.1	Enteritidis	ECN7768136.1	99.695
AEF06499.1	Enteritidis	EEC4432349.1	99.695
AEF06499.1	Enteritidis	EDD5437172.1	99.238
AEF06499.1	Enteritidis	WP_000192425.1	99.39
AEF06499.1	Enteritidis	WP_000192427.1	99.085
AEF06499.1	Enteritidis	EDA3960833.1	99.085
AEF06499.1	Enteritidis	EBU6655916.1	99.085
AEF06514.1	Enteritidis	WP_001034955.1	100
AEF06514.1	Enteritidis	EDM7277040.1	99.867
AEF06514.1	Enteritidis	EDC7375234.1	99.601
AEF06514.1	Enteritidis	EBQ8892127.1	99.734
AEF06514.1	Enteritidis	WP_001034952.1	99.734
AEF06514.1	Enteritidis	EDE8469395.1	99.601
AEF06514.1	Enteritidis	EDZ9689181.1	99.601
AEF06514.1	Enteritidis	EBW8618116.1	99.734
AEF06514.1	Enteritidis	ECK2141959.1	99.601
AEF06514.1	Enteritidis	EBR9061807.1	99.601
AEF06556.1	Enteritidis	WP_000289054.1	100
AEF06556.1	Enteritidis	EDF0292442.1	99.474
AEF06556.1	Enteritidis	EGV4468523.1	99.474
AEF06556.1	Enteritidis	EAZ9285073.1	99.474
AEF06556.1	Enteritidis	EBN0189464.1	99.474
AEF06556.1	Enteritidis	WP_000289055.1	98.947
AEF06556.1	Enteritidis	ASL55122.1	98.947
AEF06556.1	Enteritidis	MCL8978201.1	98.947
AEF06556.1	Enteritidis	EDA7289108.1	98.421
AEF06556.1	Enteritidis	MCL9591520.1	98.947
AEF06668.1	Enteritidis	ALG55786.1	100
AEF06668.1	Enteritidis	EPI62734.1	100
AEF06668.1	Enteritidis	WP_001562341.1	100
AEF06668.1	Enteritidis	EBY7569311.1	99.767
AEF06668.1	Enteritidis	ECZ5233366.1	99.767
AEF06668.1	Enteritidis	EDB4450355.1	99.767
AEF06668.1	Enteritidis	WP_135424660.1	99.767
AEF06668.1	Enteritidis	HAB1493040.1	99.767
AEF06668.1	Enteritidis	EBR9633018.1	99.767
AEF06668.1	Enteritidis	EBO3356174.1	99.767
AEF06670.1	Enteritidis	WP_000097552.1	100
AEF06670.1	Enteritidis	MCL8939084.1	99.618
AEF06670.1	Enteritidis	WP_000097553.1	99.618
AEF06670.1	Enteritidis	EAZ9453297.1	99.618
AEF06670.1	Enteritidis	EDS1442414.1	99.618
AEF06670.1	Enteritidis	ECB3031099.1	99.237
AEF06670.1	Enteritidis	WP_038394184.1	99.237
AEF06670.1	Enteritidis	HAB2113083.1	99.237
AEF06670.1	Enteritidis	ECN9006626.1	99.237
AEF06670.1	Enteritidis	MBD6217488.1	99.237
AEF06700.1	Enteritidis	WP_001094775.1	100
AEF06700.1	Enteritidis	EBV2775257.1	99.766
AEF06700.1	Enteritidis	MCL8934192.1	99.766
AEF06700.1	Enteritidis	WP_001094776.1	99.766
AEF06700.1	Enteritidis	MCL8991763.1	99.532
AEF06700.1	Enteritidis	EDE1787768.1	99.532
AEF06700.1	Enteritidis	EBN0190953.1	99.532
AEF06700.1	Enteritidis	EEK1056335.1	99.532
AEF06700.1	Enteritidis	EDC7196747.1	99.532
AEF06700.1	Enteritidis	HAC6087397.1	99.532
AEF06743.1	Enteritidis	WP_000838671.1	100
AEF06743.1	Enteritidis	ELO75463.1	100
AEF06743.1	Enteritidis	EDF1298076.1	99.597
AEF06743.1	Enteritidis	WP_099828412.1	99.597
AEF06743.1	Enteritidis	EGV4468883.1	99.597
AEF06743.1	Enteritidis	EBV1259025.1	99.597
AEF06743.1	Enteritidis	EBA0150096.1	99.597
AEF06743.1	Enteritidis	EDC9823327.1	99.597
AEF06743.1	Enteritidis	WP_000838673.1	99.597
AEF06743.1	Enteritidis	EBW2896460.1	99.597
AEF06746.1	Enteritidis	WP_000716763.1	100
AEF06746.1	Enteritidis	ECF0349014.1	99.415
AEF06746.1	Enteritidis	WP_001713900.1	99.415
AEF06746.1	Enteritidis	WP_000716765.1	99.415
AEF06746.1	Enteritidis	EBS5458681.1	99.415
AEF06746.1	Enteritidis	EGV4468880.1	99.415
AEF06746.1	Enteritidis	WP_016716049.1	99.415
AEF06746.1	Enteritidis	HAB3393985.1	99.415
AEF06746.1	Enteritidis	EHN8424715.1	100
AEF06746.1	Enteritidis	MCL8861514.1	99.415
AEF06801.1	Enteritidis	WP_000737538.1	100
AEF06801.1	Enteritidis	EBM9345390.1	99.588
AEF06801.1	Enteritidis	ECU8836082.1	99.588
AEF06801.1	Enteritidis	EDG3272004.1	99.588
AEF06801.1	Enteritidis	EBA0092863.1	99.588
AEF06801.1	Enteritidis	WP_000737613.1	99.588
AEF06801.1	Enteritidis	EBR7970736.1	99.588
AEF06801.1	Enteritidis	HAB3136045.1	99.588
AEF06801.1	Enteritidis	WP_080083526.1	99.588
AEF06801.1	Enteritidis	EDI5636810.1	99.588
AEF06804.1	Enteritidis	EPI68126.1	100
AEF06804.1	Enteritidis	WP_000756586.1	100
AEF06804.1	Enteritidis	ECM9545670.1	99.588
AEF06804.1	Enteritidis	EBZ2182149.1	99.588
AEF06804.1	Enteritidis	EIE5306911.1	99.588
AEF06804.1	Enteritidis	ECU6978511.1	99.588
AEF06804.1	Enteritidis	HAB1575818.1	99.588
AEF06804.1	Enteritidis	EBZ9009398.1	99.588
AEF06804.1	Enteritidis	EIR2643565.1	99.588
AEF06804.1	Enteritidis	WP_000756587.1	99.588
AEF06836.1	Enteritidis	ARQ49808.1	100
AEF06836.1	Enteritidis	WP_001519746.1	100
AEF06836.1	Enteritidis	MCL9218133.1	99.507
AEF06836.1	Enteritidis	EBH2513975.1	99.507
AEF06836.1	Enteritidis	WP_024139215.1	99.507
AEF06836.1	Enteritidis	ECV8323169.1	99.507
AEF06836.1	Enteritidis	EBA0150013.1	99.507
AEF06836.1	Enteritidis	ECV8574469.1	99.507
AEF06836.1	Enteritidis	MCL9514996.1	99.507
AEF06836.1	Enteritidis	MCL8977165.1	99.507
AEF06853.1	Enteritidis	WP_000792312.1	100
AEF06853.1	Enteritidis	WP_000792301.1	99.605
AEF06853.1	Enteritidis	EDM7278211.1	99.209
AEF06853.1	Enteritidis	WP_123220549.1	99.209
AEF06853.1	Enteritidis	HCB4944443.1	99.209
AEF06853.1	Enteritidis	EEA2671499.1	99.209
AEF06853.1	Enteritidis	EEN3030799.1	99.209
AEF06853.1	Enteritidis	WP_079918156.1	99.209
AEF06853.1	Enteritidis	MCL9571358.1	99.209
AEF06853.1	Enteritidis	EHW4452708.1	99.603
AEF06873.1	Enteritidis	WP_000977713.1	100
AEF06873.1	Enteritidis	EDH0399442.1	99.725
AEF06873.1	Enteritidis	WP_000977709.1	99.725
AEF06873.1	Enteritidis	EEB1575891.1	99.449
AEF06873.1	Enteritidis	EDC7194827.1	99.449
AEF06873.1	Enteritidis	EBO3339997.1	99.449
AEF06873.1	Enteritidis	MCL9615308.1	99.449
AEF06873.1	Enteritidis	HAV0913699.1	99.449
AEF06873.1	Enteritidis	WP_079785984.1	99.449
AEF06873.1	Enteritidis	HAB1579993.1	99.449
AEF06900.1	Enteritidis	WP_000798705.1	100
AEF06900.1	Enteritidis	WP_000798706.1	99.329
AEF06900.1	Enteritidis	HAZ3064675.1	98.658
AEF06900.1	Enteritidis	EBA0171938.1	98.658
AEF06900.1	Enteritidis	EDC9823492.1	98.658
AEF06900.1	Enteritidis	WP_000798708.1	98.658
AEF06900.1	Enteritidis	EBK1987856.1	97.987
AEF06900.1	Enteritidis	EEB8113632.1	97.987
AEF06900.1	Enteritidis	WP_231278894.1	97.987
AEF06900.1	Enteritidis	EEA5688275.1	97.987
AEF06917.1	Enteritidis	WP_010989010.1	100
AEF06917.1	Enteritidis	ECS6110491.1	99.899
AEF06917.1	Enteritidis	ATT49827.1	99.899
AEF06917.1	Enteritidis	MCL8658676.1	99.899
AEF06917.1	Enteritidis	EDD4265413.1	99.899
AEF06917.1	Enteritidis	EDE3783529.1	99.899
AEF06917.1	Enteritidis	EDO3121518.1	99.899
AEF06917.1	Enteritidis	EEB1772898.1	99.799
AEF06917.1	Enteritidis	ECZ7816144.1	99.799
AEF06917.1	Enteritidis	EDM7276195.1	99.598
AEF06919.1	Enteritidis	WP_000725267.1	100
AEF06919.1	Enteritidis	EBO3340191.1	100
AEF06919.1	Enteritidis	EEN4417041.1	99.394
AEF06919.1	Enteritidis	WP_000725268.1	99.394
AEF06919.1	Enteritidis	EDE0293485.1	99.394
AEF06919.1	Enteritidis	ECU6980432.1	99.394
AEF06919.1	Enteritidis	WP_000410972.1	98.788
AEF06919.1	Enteritidis	HAB3427708.1	99.375
AEF06919.1	Enteritidis	ECK2143507.1	86.747
AEF06919.1	Enteritidis	HAE0746718.1	100
AEF06920.1	Enteritidis	WP_000877926.1	100
AEF06920.1	Enteritidis	EDZ8899493.1	99.435
AEF06920.1	Enteritidis	MCL8667990.1	99.435
AEF06920.1	Enteritidis	HAB1899312.1	99.435
AEF06920.1	Enteritidis	EDA0533156.1	99.435
AEF06920.1	Enteritidis	EDB2988618.1	99.435
AEF06920.1	Enteritidis	WP_080200593.1	99.435
AEF06920.1	Enteritidis	EBH2524878.1	99.435
AEF06920.1	Enteritidis	EJG8651417.1	99.435
AEF06920.1	Enteritidis	WP_227798606.1	99.435
AEF06926.1	Enteritidis	EAY3454972.1	100
AEF06926.1	Enteritidis	EHN9666580.1	99.877
AEF06926.1	Enteritidis	WP_001144693.1	99.877
AEF06926.1	Enteritidis	EDO3120545.1	99.507
AEF06926.1	Enteritidis	EBA0170042.1	99.631
AEF06926.1	Enteritidis	WP_022742660.1	99.384
AEF06926.1	Enteritidis	ECX3331624.1	99.138
AEF06926.1	Enteritidis	EEN4417034.1	97.537
AEF06926.1	Enteritidis	EDC9823520.1	97.66
AEF06926.1	Enteritidis	EDN5718044.1	97.54
AEF06947.1	Enteritidis	EPI69971.1	100
AEF06947.1	Enteritidis	WP_001674965.1	100
AEF06947.1	Enteritidis	EBS6730113.1	99.714
AEF06947.1	Enteritidis	AHV53199.1	100
AEF06947.1	Enteritidis	ECM4251962.1	99.714
AEF06947.1	Enteritidis	EBS4021423.1	99.714
AEF06947.1	Enteritidis	WP_079932340.1	99.714
AEF06947.1	Enteritidis	MCL8863067.1	99.714
AEF06947.1	Enteritidis	EBK2536280.1	99.714
AEF06947.1	Enteritidis	EBZ2260700.1	99.714
AEF06958.1	Enteritidis	WP_000859419.1	100
AEF06958.1	Enteritidis	MCL9006389.1	99.451
AEF06958.1	Enteritidis	WP_000859416.1	99.451
AEF06958.1	Enteritidis	EAY3455003.1	99.451
AEF06958.1	Enteritidis	EBW7491347.1	98.901
AEF06958.1	Enteritidis	EDC0667393.1	98.901
AEF06958.1	Enteritidis	HAW6769865.1	98.901
AEF06958.1	Enteritidis	WP_000859417.1	98.901
AEF06958.1	Enteritidis	WP_000859420.1	98.901
AEF06958.1	Enteritidis	EKC9283159.1	98.901
AEF06964.1	Enteritidis	WP_001123045.1	100
AEF06964.1	Enteritidis	MCL8657093.1	99.656
AEF06964.1	Enteritidis	EBV2578346.1	99.656
AEF06964.1	Enteritidis	HAE0253489.1	99.656
AEF06964.1	Enteritidis	EAZ9450789.1	99.656
AEF06964.1	Enteritidis	EHN9706719.1	98.98
AEF06964.1	Enteritidis	EBA0170078.1	98.625
AEF06964.1	Enteritidis	ECK2141220.1	98.282
AEF06964.1	Enteritidis	EBH2711188.1	98.282
AEF06964.1	Enteritidis	MCL9104957.1	98.625
AEF07006.1	Enteritidis	WP_000700610.1	100
AEF07006.1	Enteritidis	EBM9779307.1	99.565
AEF07006.1	Enteritidis	ECZ5234836.1	99.565
AEF07006.1	Enteritidis	WP_000700608.1	99.565
AEF07006.1	Enteritidis	EIE5307291.1	99.565
AEF07006.1	Enteritidis	EHQ6790459.1	99.13
AEF07006.1	Enteritidis	EDD5460318.1	99.565
AEF07006.1	Enteritidis	EDG3272672.1	99.565
AEF07006.1	Enteritidis	EBV8561088.1	99.565
AEF07006.1	Enteritidis	MCL9218245.1	99.565
AEF07017.1	Enteritidis	WP_000791655.1	100
AEF07017.1	Enteritidis	EPI70204.1	100
AEF07017.1	Enteritidis	ECI2500872.1	99.338
AEF07017.1	Enteritidis	EBV1259785.1	99.338
AEF07017.1	Enteritidis	EGW2795277.1	99.338
AEF07017.1	Enteritidis	EIE5305222.1	99.338
AEF07017.1	Enteritidis	EEJ7550603.1	99.338
AEF07017.1	Enteritidis	EEQ0835585.1	99.338
AEF07017.1	Enteritidis	WP_000791659.1	99.338
AEF07017.1	Enteritidis	ECY3846869.1	99.338
AEF07018.1	Enteritidis	WP_000771416.1	100
AEF07018.1	Enteritidis	ECL9741327.1	99.338
AEF07018.1	Enteritidis	EDN3369193.1	99.338
AEF07018.1	Enteritidis	HAE4714646.1	99.338
AEF07018.1	Enteritidis	MJY18667.1	99.338
AEF07018.1	Enteritidis	WP_154080209.1	99.338
AEF07018.1	Enteritidis	ECI2500873.1	99.338
AEF07018.1	Enteritidis	EBN0192090.1	99.338
AEF07018.1	Enteritidis	EIE5305223.1	99.338
AEF07018.1	Enteritidis	WP_001728044.1	99.338
AEF07078.1	Enteritidis	WP_000008410.1	100
AEF07078.1	Enteritidis	EDL6772844.1	99.862
AEF07078.1	Enteritidis	HAE0384041.1	99.862
AEF07078.1	Enteritidis	EDN5719805.1	99.724
AEF07078.1	Enteritidis	EEC4430886.1	99.862
AEF07078.1	Enteritidis	EPI70139.1	99.724
AEF07078.1	Enteritidis	WP_000008403.1	99.724
AEF07078.1	Enteritidis	EHJ0426583.1	99.586
AEF07078.1	Enteritidis	EEN7883425.1	99.586
AEF07078.1	Enteritidis	ECM2084446.1	99.586
AEF07117.1	Enteritidis	WP_001520581.1	100
AEF07117.1	Enteritidis	EBW8667365.1	99.422
AEF07117.1	Enteritidis	EBA1415723.1	99.422
AEF07117.1	Enteritidis	WP_022742669.1	99.422
AEF07117.1	Enteritidis	WP_001532066.1	99.422
AEF07117.1	Enteritidis	ECX0475514.1	98.844
AEF07117.1	Enteritidis	ECV7577789.1	98.844
AEF07117.1	Enteritidis	EDO3117113.1	99.422
AEF07117.1	Enteritidis	EBY3686137.1	98.844
AEF07117.1	Enteritidis	EDM7279193.1	98.844
AEF07120.1	Enteritidis	WP_000789471.1	100
AEF07120.1	Enteritidis	WP_000789470.1	99.459
AEF07120.1	Enteritidis	EBW8615378.1	99.459
AEF07120.1	Enteritidis	ECX1952406.1	99.459
AEF07120.1	Enteritidis	WP_061083783.1	99.459
AEF07120.1	Enteritidis	MCL9514768.1	98.919
AEF07120.1	Enteritidis	WP_000789466.1	99.459
AEF07120.1	Enteritidis	WP_023226910.1	99.459
AEF07120.1	Enteritidis	EEC1853209.1	98.919
AEF07120.1	Enteritidis	MCL9218412.1	98.919
AEF07157.1	Enteritidis	WP_000163762.1	100
AEF07157.1	Enteritidis	EBY9435655.1	99.597
AEF07157.1	Enteritidis	ECI2498049.1	99.597
AEF07157.1	Enteritidis	EBZ1812431.1	99.597
AEF07157.1	Enteritidis	MCL8976839.1	99.597
AEF07157.1	Enteritidis	EDJ3507217.1	99.597
AEF07157.1	Enteritidis	EBA0170487.1	99.597
AEF07157.1	Enteritidis	MBD6281002.1	99.597
AEF07157.1	Enteritidis	EBQ8892818.1	99.597
AEF07157.1	Enteritidis	EBN0190320.1	99.597
AEF07198.1	Enteritidis	WP_000770981.1	100
AEF07198.1	Enteritidis	EBM6068085.1	99.603
AEF07198.1	Enteritidis	WP_000770979.1	99.603
AEF07198.1	Enteritidis	EEN5541472.1	99.603
AEF07198.1	Enteritidis	EDK1264417.1	99.603
AEF07198.1	Enteritidis	EBA0149732.1	99.603
AEF07198.1	Enteritidis	EEA5155512.1	99.603
AEF07198.1	Enteritidis	EDC3899736.1	99.603
AEF07198.1	Enteritidis	WP_000770983.1	99.603
AEF07198.1	Enteritidis	MCL9528872.1	99.603
AEF07299.1	Enteritidis	EBB4915024.1	100
AEF07299.1	Enteritidis	WP_000007299.1	99.482
AEF07299.1	Enteritidis	WP_039589826.1	98.964
AEF07299.1	Enteritidis	HAE0386093.1	98.964
AEF07299.1	Enteritidis	EBS3799682.1	98.964
AEF07299.1	Enteritidis	ECG4009982.1	99.479
AEF07299.1	Enteritidis	ECM3238928.1	98.964
AEF07299.1	Enteritidis	EAZ9449055.1	98.964
AEF07299.1	Enteritidis	WP_080187270.1	98.964
AEF07299.1	Enteritidis	MCL9034585.1	98.964
AEF07313.1	Enteritidis	WP_000597179.1	100
AEF07313.1	Enteritidis	ECT2272102.1	99.355
AEF07313.1	Enteritidis	EDD0347757.1	99.355
AEF07313.1	Enteritidis	WP_000621211.1	99.355
AEF07313.1	Enteritidis	MCL8731507.1	99.355
AEF07313.1	Enteritidis	ECM1181239.1	99.355
AEF07313.1	Enteritidis	WP_227806943.1	99.355
AEF07313.1	Enteritidis	MBD6322814.1	99.355
AEF07313.1	Enteritidis	MBD6320294.1	99.355
AEF07313.1	Enteritidis	EFQ2755301.1	99.355
AEF07339.1	Enteritidis	EGS2295125.1	100
AEF07339.1	Enteritidis	WP_000824309.1	99.735
AEF07339.1	Enteritidis	ECK9768247.1	99.469
AEF07339.1	Enteritidis	ECI2491863.1	99.469
AEF07339.1	Enteritidis	MCL8655170.1	99.469
AEF07339.1	Enteritidis	EBV2577130.1	99.469
AEF07339.1	Enteritidis	EDO3116877.1	99.469
AEF07339.1	Enteritidis	WP_023232588.1	99.469
AEF07339.1	Enteritidis	MCL9107376.1	94.517
AEF07339.1	Enteritidis	EDE1802102.1	94.256
AEF07350.1	Enteritidis	AHQ36202.2	97.872
AEF07350.1	Enteritidis	AVL16433.1	96.739
AEF07350.1	Enteritidis	WP_000756314.1	100
AEF07350.1	Enteritidis	MCL9486610.1	98.78
AEF07350.1	Enteritidis	EDC7372871.1	98.78
AEF07350.1	Enteritidis	WP_000756317.1	98.78
AEF07350.1	Enteritidis	EBM9776344.1	98.78
AEF07350.1	Enteritidis	EDE4817608.1	98.78
AEF07350.1	Enteritidis	ECN7770405.1	97.561
AEF07350.1	Enteritidis	ECM3699315.1	97.561
AEF07365.1	Enteritidis	WP_000975516.1	100
AEF07365.1	Enteritidis	EDD5834679.1	99.02
AEF07365.1	Enteritidis	ECY3500379.1	99.02
AEF07365.1	Enteritidis	WP_000975514.1	99.02
AEF07365.1	Enteritidis	MCL8701017.1	99.02
AEF07365.1	Enteritidis	EGL3969096.1	99.02
AEF07365.1	Enteritidis	WP_000975517.1	99.02
AEF07365.1	Enteritidis	WP_079911906.1	99.02
AEF07365.1	Enteritidis	EED6948188.1	99.02
AEF07365.1	Enteritidis	EDC7372885.1	99.02
AEF07397.1	Enteritidis	WP_000758335.1	100
AEF07397.1	Enteritidis	MCL8931294.1	99.731
AEF07397.1	Enteritidis	EDO3236098.1	99.731
AEF07397.1	Enteritidis	ELO86351.1	100
AEF07397.1	Enteritidis	WP_053330493.1	99.731
AEF07397.1	Enteritidis	WP_000758340.1	99.731
AEF07397.1	Enteritidis	EED5117817.1	99.731
AEF07397.1	Enteritidis	EED5046100.1	99.731
AEF07397.1	Enteritidis	EJA6292786.1	99.731
AEF07397.1	Enteritidis	MCL9068292.1	99.731
AEF07442.1	Enteritidis	EPI73535.1	99.724
AEF07442.1	Enteritidis	WP_000769035.1	100
AEF07442.1	Enteritidis	WP_000769037.1	99.724
AEF07442.1	Enteritidis	WP_000769039.1	99.724
AEF07442.1	Enteritidis	ECX3041202.1	99.724
AEF07442.1	Enteritidis	EDF3426876.1	99.724
AEF07442.1	Enteritidis	EEA2673468.1	99.724
AEF07442.1	Enteritidis	EEA9571377.1	99.448
AEF07442.1	Enteritidis	EEE7874358.1	99.724
AEF07442.1	Enteritidis	EDS2169990.1	99.448
AEF07457.1	Enteritidis	WP_000692042.1	100
AEF07457.1	Enteritidis	EAZ9284649.1	99.858
AEF07457.1	Enteritidis	EEC4429435.1	99.858
AEF07457.1	Enteritidis	EBQ9881164.1	99.858
AEF07457.1	Enteritidis	EDM2006749.1	99.717
AEF07457.1	Enteritidis	EDC7360492.1	99.717
AEF07457.1	Enteritidis	EBR7970142.1	99.717
AEF07457.1	Enteritidis	EBW0390571.1	99.717
AEF07457.1	Enteritidis	ECZ7818325.1	99.717
AEF07457.1	Enteritidis	HAC6522213.1	99.717
AEF07604.1	Enteritidis	WP_000714799.1	100
AEF07604.1	Enteritidis	EBL5060787.1	99.528
AEF07604.1	Enteritidis	EEJ9602725.1	99.528
AEF07604.1	Enteritidis	EDA6924611.1	99.528
AEF07604.1	Enteritidis	EDO3118337.1	99.528
AEF07604.1	Enteritidis	EEN6976790.1	99.528
AEF07604.1	Enteritidis	HAB2594246.1	99.528
AEF07604.1	Enteritidis	EBQ8890379.1	99.528
AEF07604.1	Enteritidis	HCR9641904.1	99.528
AEF07604.1	Enteritidis	EDO4225698.1	99.528
AEF07768.1	Enteritidis	KOX84275.1	100
AEF07768.1	Enteritidis	CIC93283.1	99.7
AEF07768.1	Enteritidis	AHQ33247.2	100
AEF07768.1	Enteritidis	EBX7303486.1	99.687
AEF07768.1	Enteritidis	EGW3960899.1	99.687
AEF07768.1	Enteritidis	ECS6188799.1	99.687
AEF07768.1	Enteritidis	ECS7832230.1	99.687
AEF07768.1	Enteritidis	EBS0925198.1	99.687
AEF07768.1	Enteritidis	ECU0229001.1	99.373
AEF07768.1	Enteritidis	EBX8624785.1	99.687
AEF07866.1	Enteritidis	WP_001080680.1	100
AEF07866.1	Enteritidis	EBW8616737.1	99.497
AEF07866.1	Enteritidis	HAE0161042.1	99.252
AEF07866.1	Enteritidis	EDB4447155.1	98.744
AEF07866.1	Enteritidis	EEB1578103.1	98.744
AEF07866.1	Enteritidis	WP_023231006.1	98.492
AEF07866.1	Enteritidis	EBW9338586.1	98.241
AEF07866.1	Enteritidis	ECI2484264.1	98
AEF07866.1	Enteritidis	EBA0093982.1	97.99
AEF07866.1	Enteritidis	MCL9221565.1	97.487
AEF07875.1	Enteritidis	WP_000554737.1	100
AEF07875.1	Enteritidis	WP_000554738.1	99.808
AEF07875.1	Enteritidis	EBB4917121.1	99.808
AEF07875.1	Enteritidis	WP_249979871.1	99.615
AEF07875.1	Enteritidis	EBM6068864.1	99.808
AEF07875.1	Enteritidis	ECN1432103.1	99.615
AEF07875.1	Enteritidis	WP_079941544.1	99.615
AEF07875.1	Enteritidis	EDE1131807.1	99.615
AEF07875.1	Enteritidis	ECX0785426.1	99.615
AEF07875.1	Enteritidis	EBW7932696.1	99.615
AEF07926.1	Enteritidis	ATT45488.1	100
AEF07926.1	Enteritidis	KUA98801.1	99.823
AEF07926.1	Enteritidis	WP_010989035.1	100
AEF07926.1	Enteritidis	ECY4326906.1	99.823
AEF07926.1	Enteritidis	MCL8920535.1	99.823
AEF07926.1	Enteritidis	EEL6051892.1	99.823
AEF07926.1	Enteritidis	ECK2143027.1	99.823
AEF07926.1	Enteritidis	EDB4447164.1	99.823
AEF07926.1	Enteritidis	MCL9006142.1	99.823
AEF07926.1	Enteritidis	EIL1354245.1	99.823
AEF08065.1	Enteritidis	WP_000765279.1	100
AEF08065.1	Enteritidis	ECK2142665.1	99.701
AEF08065.1	Enteritidis	EBM9777627.1	99.701
AEF08065.1	Enteritidis	EDC9824713.1	99.701
AEF08065.1	Enteritidis	MCL8915726.1	99.701
AEF08065.1	Enteritidis	EBW0391667.1	99.701
AEF08065.1	Enteritidis	WP_000765280.1	99.701
AEF08065.1	Enteritidis	EDE9383214.1	99.701
AEF08065.1	Enteritidis	ECV3912380.1	99.403
AEF08065.1	Enteritidis	EEB1770757.1	99.701
AEF08066.1	Enteritidis	WP_000945364.1	100
AEF08066.1	Enteritidis	EBH2513378.1	99.879
AEF08066.1	Enteritidis	ECT6970709.1	99.879
AEF08066.1	Enteritidis	EDE1815775.1	99.759
AEF08066.1	Enteritidis	HAE0167891.1	99.879
AEF08066.1	Enteritidis	WP_000945367.1	99.759
AEF08066.1	Enteritidis	ECX1955991.1	99.759
AEF08066.1	Enteritidis	ECY5945790.1	99.879
AEF08066.1	Enteritidis	WP_000945363.1	99.759
AEF08066.1	Enteritidis	WP_123220564.1	99.638
AEF08116.1	Enteritidis	WP_000488255.1	100
AEF08116.1	Enteritidis	EAZ9451815.1	99.849
AEF08116.1	Enteritidis	WP_000488251.1	99.698
AEF08116.1	Enteritidis	EBS5459700.1	99.849
AEF08116.1	Enteritidis	EBA0152375.1	99.849
AEF08116.1	Enteritidis	MCL8670062.1	99.849
AEF08116.1	Enteritidis	MCL8901790.1	99.698
AEF08116.1	Enteritidis	MCL9532132.1	99.698
AEF08116.1	Enteritidis	ECK2141787.1	99.698
AEF08116.1	Enteritidis	EBW8668501.1	99.548
AEF08173.1	Enteritidis	ELO90868.1	100
AEF08173.1	Enteritidis	EPI66553.1	100
AEF08173.1	Enteritidis	WP_000835182.1	100
AEF08173.1	Enteritidis	EEA5877046.1	99.329
AEF08173.1	Enteritidis	MBD6213429.1	99.329
AEF08173.1	Enteritidis	ECM0342516.1	99.329
AEF08173.1	Enteritidis	WP_110160680.1	99.329
AEF08173.1	Enteritidis	HAC6041455.1	99.329
AEF08173.1	Enteritidis	HCB4941971.1	99.329
AEF08173.1	Enteritidis	TGC32917.1	99.329
AEF08184.1	Enteritidis	WP_000865526.1	100
AEF08184.1	Enteritidis	EDM7279424.1	99.735
AEF08184.1	Enteritidis	EBX9044309.1	99.735
AEF08184.1	Enteritidis	WP_000865523.1	99.735
AEF08184.1	Enteritidis	EDH0187227.1	99.735
AEF08184.1	Enteritidis	EBU6656661.1	99.735
AEF08184.1	Enteritidis	EBH2710454.1	99.471
AEF08184.1	Enteritidis	EBW0392351.1	99.735
AEF08184.1	Enteritidis	ECN7768977.1	99.471
AEF08184.1	Enteritidis	EBV2370435.1	99.206
AEF08270.1	Enteritidis	WP_000731868.1	100
AEF08270.1	Enteritidis	WP_000731865.1	99.615
AEF08270.1	Enteritidis	WP_038394303.1	99.615
AEF08270.1	Enteritidis	ERH39432.1	99.615
AEF08270.1	Enteritidis	EDD5460512.1	99.615
AEF08270.1	Enteritidis	EDC7361170.1	99.615
AEF08270.1	Enteritidis	EDB2962496.1	99.615
AEF08270.1	Enteritidis	EDB6484184.1	99.615
AEF08270.1	Enteritidis	EHE0637416.1	99.615
AEF08270.1	Enteritidis	EDD5582155.1	99.615
AEF08271.1	Enteritidis	WP_000754423.1	100
AEF08271.1	Enteritidis	EBA0169373.1	99.615
AEF08271.1	Enteritidis	EIL1355060.1	99.615
AEF08271.1	Enteritidis	EDC7376005.1	99.615
AEF08271.1	Enteritidis	MCL8657332.1	99.615
AEF08271.1	Enteritidis	EDE1803936.1	99.615
AEF08271.1	Enteritidis	WP_000754418.1	99.615
AEF08271.1	Enteritidis	EDC7196109.1	99.615
AEF08271.1	Enteritidis	HCB4941873.1	99.615
AEF08271.1	Enteritidis	EDD5427067.1	99.615
AEF08307.1	Enteritidis	AHU92968.1	100
AEF08307.1	Enteritidis	EDA3960666.1	99.771
AEF08307.1	Enteritidis	EEM6601921.1	99.771
AEF08307.1	Enteritidis	EDC7375969.1	99.771
AEF08307.1	Enteritidis	ECD0225871.1	99.771
AEF08307.1	Enteritidis	EDF2051478.1	99.771
AEF08307.1	Enteritidis	EBZ4585880.1	99.771
AEF08307.1	Enteritidis	EBU6659998.1	99.771
AEF08307.1	Enteritidis	EDY6214867.1	99.771
AEF08307.1	Enteritidis	EBB4523688.1	99.771
AEF08310.1	Enteritidis	WP_000716007.1	100
AEF08310.1	Enteritidis	WP_000716006.1	99.679
AEF08310.1	Enteritidis	EBA0169334.1	99.679
AEF08310.1	Enteritidis	EPI68972.1	99.359
AEF08310.1	Enteritidis	WP_000716011.1	99.359
AEF08310.1	Enteritidis	WP_080083394.1	99.359
AEF08310.1	Enteritidis	ECI2303809.1	99.359
AEF08310.1	Enteritidis	EHG3797736.1	99.359
AEF08310.1	Enteritidis	EEE4102153.1	99.038
AEF08310.1	Enteritidis	EBU7116051.1	99.038
AEF08334.1	Enteritidis	WP_000722926.1	100
AEF08334.1	Enteritidis	EDD7834011.1	99.605
AEF08334.1	Enteritidis	EAY3168522.1	99.605
AEF08334.1	Enteritidis	EGX2599345.1	99.605
AEF08334.1	Enteritidis	EDJ3509170.1	99.605
AEF08334.1	Enteritidis	EDM2009329.1	99.605
AEF08334.1	Enteritidis	EBW9023184.1	99.605
AEF08334.1	Enteritidis	WP_000722929.1	99.605
AEF08334.1	Enteritidis	EDD0349611.1	99.605
AEF08334.1	Enteritidis	WP_058106817.1	99.605
AEF08399.1	Enteritidis	WP_000331877.1	100
AEF08399.1	Enteritidis	WP_001619327.1	99.709
AEF08399.1	Enteritidis	ECT6969749.1	99.709
AEF08399.1	Enteritidis	MCL9330142.1	99.709
AEF08399.1	Enteritidis	EDB2018689.1	99.709
AEF08399.1	Enteritidis	HAO7946664.1	99.709
AEF08399.1	Enteritidis	WP_000331880.1	99.709
AEF08399.1	Enteritidis	ECX1954013.1	99.709
AEF08399.1	Enteritidis	EDC9822098.1	99.709
AEF08399.1	Enteritidis	EBA0091842.1	99.709
AEF08424.1	Enteritidis	WP_071824260.1	99.902
AEF08424.1	Enteritidis	MCL9115751.1	99.902
AEF08424.1	Enteritidis	MCL8723320.1	99.902
AEF08424.1	Enteritidis	EDL2897260.1	96.861
AEF08424.1	Enteritidis	ECM0345755.1	96.861
AEF08424.1	Enteritidis	ECS5857801.1	96.861
AEF08424.1	Enteritidis	MCL8823870.1	96.371
AEF08424.1	Enteritidis	EBH2710210.1	96.42
AEF08424.1	Enteritidis	WP_071908252.1	95.495
AEF08424.1	Enteritidis	WP_071888975.1	95.446
AEF08425.1	Enteritidis	EBB4919287.1	100
AEF08425.1	Enteritidis	WP_000375792.1	99.946
AEF08425.1	Enteritidis	ECS6108890.1	99.893
AEF08425.1	Enteritidis	EEC4433277.1	99.893
AEF08425.1	Enteritidis	MCL8657418.1	99.946
AEF08425.1	Enteritidis	MCL8915369.1	99.946
AEF08425.1	Enteritidis	MCL9257476.1	99.893
AEF08425.1	Enteritidis	ECU9016973.1	99.571
AEF08425.1	Enteritidis	ECN7768395.1	99.464
AEF08425.1	Enteritidis	EDC9822070.1	99.41
AEF08431.1	Enteritidis	EDE0555389.1	99.515
AEF08431.1	Enteritidis	WP_000409190.1	100
AEF08431.1	Enteritidis	EBX1378760.1	99.515
AEF08431.1	Enteritidis	MCL8746960.1	99.515
AEF08431.1	Enteritidis	EFQ4064426.1	99.515
AEF08431.1	Enteritidis	AAP83327.1	99.515
AEF08431.1	Enteritidis	EBM0682065.1	99.515
AEF08431.1	Enteritidis	ECK2140861.1	99.515
AEF08431.1	Enteritidis	ECX3044380.1	99.515
AEF08431.1	Enteritidis	EBS1228872.1	99.515
AEF08499.1	Enteritidis	EDE3781643.1	99.873
AEF08499.1	Enteritidis	EBB4919230.1	99.747
AEF08499.1	Enteritidis	EDB9815510.1	99.747
AEF08499.1	Enteritidis	EDL6775719.1	99.62
AEF08499.1	Enteritidis	EEC3069566.1	99.747
AEF08499.1	Enteritidis	WP_022742779.1	99.747
AEF08499.1	Enteritidis	HDA5318688.1	99.747
AEF08499.1	Enteritidis	EAZ9288573.1	99.367
AEF08499.1	Enteritidis	ECM0343395.1	96.966
AEF08499.1	Enteritidis	MCL9218401.1	93.966
AEF08506.1	Enteritidis	EAZ9288384.1	100
AEF08506.1	Enteritidis	EBB4919223.1	99.806
AEF08506.1	Enteritidis	EDE4783403.1	99.418
AEF08506.1	Enteritidis	EBL6452747.1	99.418
AEF08506.1	Enteritidis	EDR2708087.1	99.321
AEF08506.1	Enteritidis	WP_022742781.1	99.321
AEF08506.1	Enteritidis	EBW6086405.1	99.321
AEF08506.1	Enteritidis	MBJ4144916.1	99.321
AEF08506.1	Enteritidis	EBS5460522.1	99.321
AEF08506.1	Enteritidis	EDW1069655.1	99.224
AEF08592.1	Enteritidis	WP_001203445.1	100
AEF08592.1	Enteritidis	WP_208209087.1	99.107
AEF08592.1	Enteritidis	EDJ2703704.1	99.107
AEF08592.1	Enteritidis	EBV2374732.1	99.107
AEF08592.1	Enteritidis	MCL8901269.1	99.107
AEF08592.1	Enteritidis	MCL9617611.1	99.107
AEF08592.1	Enteritidis	EBA0151005.1	99.107
AEF08592.1	Enteritidis	EDZ9859359.1	99.107
AEF08592.1	Enteritidis	ECM2090703.1	99.107
AEF08592.1	Enteritidis	EBW8843310.1	93.519
AEF08636.1	Enteritidis	EGS2295967.1	100
AEF08636.1	Enteritidis	EAZ9285449.1	99.862
AEF08636.1	Enteritidis	EEN5245621.1	99.587
AEF08636.1	Enteritidis	EGX2073934.1	99.725
AEF08636.1	Enteritidis	ECS6108016.1	99.725
AEF08636.1	Enteritidis	EBR7972977.1	99.587
AEF08636.1	Enteritidis	ECM0310888.1	99.587
AEF08636.1	Enteritidis	ECQ4323236.1	99.587
AEF08636.1	Enteritidis	EBW7492658.1	99.449
AEF08636.1	Enteritidis	ECK2139709.1	99.587
AEF08671.1	Enteritidis	WP_001216622.1	100
AEF08671.1	Enteritidis	ECA8713573.1	99.698
AEF08671.1	Enteritidis	EDF4219001.1	99.698
AEF08671.1	Enteritidis	EBW8619059.1	99.698
AEF08671.1	Enteritidis	WP_001216618.1	99.698
AEF08671.1	Enteritidis	EIE2614356.1	99.698
AEF08671.1	Enteritidis	WP_099846881.1	99.698
AEF08671.1	Enteritidis	EBS2306808.1	99.698
AEF08671.1	Enteritidis	WP_079785840.1	99.698
AEF08671.1	Enteritidis	EHN9666349.1	99.698
AEF08737.1	Enteritidis	WP_000258811.1	100
AEF08737.1	Enteritidis	EBX4936741.1	99.854
AEF08737.1	Enteritidis	EBH2523922.1	99.854
AEF08737.1	Enteritidis	EDO3118683.1	99.854
AEF08737.1	Enteritidis	WP_000258819.1	99.854
AEF08737.1	Enteritidis	EDN5718917.1	99.854
AEF08737.1	Enteritidis	EBR9490403.1	99.708
AEF08737.1	Enteritidis	MCL8913891.1	99.708
AEF08737.1	Enteritidis	EDF1648859.1	99.708
AEF08737.1	Enteritidis	EBQ6013524.1	99.708
AEF08739.1	Enteritidis	WP_000909019.1	100
AEF08739.1	Enteritidis	EDI5450048.1	99.756
AEF08739.1	Enteritidis	EBW3651438.1	99.756
AEF08739.1	Enteritidis	EBA1416919.1	99.756
AEF08739.1	Enteritidis	WP_038424418.1	99.756
AEF08739.1	Enteritidis	MCL9404946.1	99.511
AEF08739.1	Enteritidis	EBM0680243.1	99.756
AEF08739.1	Enteritidis	EDJ2791663.1	99.756
AEF08739.1	Enteritidis	WP_000909025.1	99.756
AEF08739.1	Enteritidis	ECK8945578.1	99.756
AEF08779.1	Enteritidis	EDD4261682.1	100
AEF08779.1	Enteritidis	EBQ9881550.1	99.732
AEF08779.1	Enteritidis	EDY2622029.1	99.464
AEF08779.1	Enteritidis	EAZ9449579.1	99.464
AEF08779.1	Enteritidis	EEB1772724.1	99.196
AEF08779.1	Enteritidis	EBN0191613.1	99.196
AEF08779.1	Enteritidis	AHN99682.1	98.939
AEF08779.1	Enteritidis	EBA1416962.1	98.674
AEF08779.1	Enteritidis	HAE3142073.1	98.674
AEF08779.1	Enteritidis	EDE6922460.1	98.674
AEF08880.1	Enteritidis	EDD4265490.1	100
AEF08880.1	Enteritidis	EBL6452001.1	99.759
AEF08880.1	Enteritidis	WP_000705483.1	99.879
AEF08880.1	Enteritidis	WP_000705485.1	99.759
AEF08880.1	Enteritidis	MCL8858068.1	99.759
AEF08880.1	Enteritidis	EDD5833301.1	99.638
AEF08880.1	Enteritidis	ECS6109246.1	99.759
AEF08880.1	Enteritidis	EEN4419679.1	99.759
AEF08880.1	Enteritidis	EDC7374140.1	99.638
AEF08880.1	Enteritidis	HAE0158160.1	99.759
AEF08883.1	Enteritidis	WP_001038506.1	100
AEF08883.1	Enteritidis	MCL8777206.1	99.438
AEF08883.1	Enteritidis	EDF4236209.1	99.438
AEF08883.1	Enteritidis	WP_001038505.1	99.438
AEF08883.1	Enteritidis	WP_001038502.1	99.438
AEF08883.1	Enteritidis	EPI65082.1	99.438
AEF08883.1	Enteritidis	WP_001038501.1	98.876
AEF08883.1	Enteritidis	EBU9459982.1	98.876
AEF08883.1	Enteritidis	EDU2881060.1	98.876
AEF08883.1	Enteritidis	MCL9104336.1	98.876
AEF08888.1	Enteritidis	WP_000244329.1	100
AEF08888.1	Enteritidis	WP_000244328.1	99.603
AEF08888.1	Enteritidis	EDA3957683.1	99.603
AEF08888.1	Enteritidis	WP_000244318.1	99.206
AEF08888.1	Enteritidis	EBR7972593.1	99.206
AEF08888.1	Enteritidis	EDE6397819.1	99.206
AEF08888.1	Enteritidis	EEC1737013.1	99.206
AEF08888.1	Enteritidis	EBH2712163.1	99.206
AEF08888.1	Enteritidis	EEE7874081.1	99.206
AEF08888.1	Enteritidis	ECH8173626.1	99.206
AEF08915.1	Enteritidis	WP_000669854.1	100
AEF08915.1	Enteritidis	WP_023203995.1	99.597
AEF08915.1	Enteritidis	EDB6881079.1	99.597
AEF08915.1	Enteritidis	MCL8937084.1	99.597
AEF08915.1	Enteritidis	EBV8560573.1	99.597
AEF08915.1	Enteritidis	WP_061371888.1	99.597
AEF08915.1	Enteritidis	EBW5476051.1	99.597
AEF08915.1	Enteritidis	EBS0871831.1	99.597
AEF08915.1	Enteritidis	EBV1257239.1	99.597
AEF08915.1	Enteritidis	MCL8758715.1	99.597
AEF09035.1	Enteritidis	WP_014343899.1	100
AEF09035.1	Enteritidis	MCL9219102.1	99.796
AEF09035.1	Enteritidis	EBH2712009.1	100
AEF09035.1	Enteritidis	EDB4448175.1	99.796
AEF09035.1	Enteritidis	EDB5330038.1	99.593
AEF09035.1	Enteritidis	EBA1417232.1	99.796
AEF09035.1	Enteritidis	WP_015899378.1	99.796
AEF09035.1	Enteritidis	WP_072162109.1	99.593
AEF09035.1	Enteritidis	EDA7989173.1	99.796
AEF09035.1	Enteritidis	WP_022742825.1	99.796
AEF09108.1	Enteritidis	WP_000643280.1	100
AEF09108.1	Enteritidis	EDP2436550.1	99.476
AEF09108.1	Enteritidis	MBD6364822.1	99.476
AEF09108.1	Enteritidis	EBZ6188076.1	99.476
AEF09108.1	Enteritidis	ECN7770018.1	99.476
AEF09108.1	Enteritidis	EBH2714178.1	99.476
AEF09108.1	Enteritidis	EBU6658021.1	99.476
AEF09108.1	Enteritidis	EBZ7796757.1	99.476
AEF09108.1	Enteritidis	HAV1043232.1	99.476
AEF09108.1	Enteritidis	WP_115430603.1	99.476
AEF09288.1	Enteritidis	WP_000838227.1	100
AEF09288.1	Enteritidis	EDC7376642.1	99.632
AEF09288.1	Enteritidis	EDE4821732.1	99.632
AEF09288.1	Enteritidis	ELY13227.1	99.632
AEF09288.1	Enteritidis	EDB4450222.1	99.632
AEF09288.1	Enteritidis	WP_000838225.1	99.632
AEF09288.1	Enteritidis	EDK5264243.1	99.632
AEF09288.1	Enteritidis	EPI69211.1	99.632
AEF09288.1	Enteritidis	EBQ9830391.1	99.265
AEF09288.1	Enteritidis	HAB2883837.1	99.265
AEF09385.1	Enteritidis	WP_000805096.1	100
AEF09385.1	Enteritidis	EDE1855291.1	99.828
AEF09385.1	Enteritidis	EDO3120263.1	99.828
AEF09385.1	Enteritidis	EBH2523334.1	99.655
AEF09385.1	Enteritidis	EBS5457103.1	99.483
AEF09385.1	Enteritidis	WP_000805094.1	99.483
AEF09385.1	Enteritidis	HAE0292556.1	99.483
AEF09385.1	Enteritidis	MCL9531585.1	99.483
AEF09385.1	Enteritidis	ECI2488549.1	99.31
AEF09385.1	Enteritidis	EDC9822580.1	99.31
AEF09471.1	Enteritidis	WP_000792957.1	100
AEF09471.1	Enteritidis	WP_000792958.1	99.429
AEF09471.1	Enteritidis	EDA3959076.1	99.429
AEF09471.1	Enteritidis	EBQ9496746.1	99.429
AEF09471.1	Enteritidis	EIV6290245.1	99.429
AEF09471.1	Enteritidis	EDF1528699.1	99.429
AEF09471.1	Enteritidis	EBA0171283.1	99.429
AEF09471.1	Enteritidis	EHD7257970.1	99.429
AEF09471.1	Enteritidis	EDE4818685.1	98.857
AEF09471.1	Enteritidis	EEB2325616.1	99.429
AEF09472.1	Enteritidis	WP_000220312.1	100
AEF09472.1	Enteritidis	EDL2893088.1	99.881
AEF09472.1	Enteritidis	WP_000220310.1	99.881
AEF09472.1	Enteritidis	EBQ8890581.1	99.881
AEF09472.1	Enteritidis	WP_021000884.1	99.881
AEF09472.1	Enteritidis	EBM9777325.1	99.762
AEF09472.1	Enteritidis	ECM0310245.1	99.881
AEF09472.1	Enteritidis	EDG6881299.1	99.881
AEF09472.1	Enteritidis	ECO6315681.1	99.762
AEF09472.1	Enteritidis	EDE9381655.1	99.762
AEF09473.1	Enteritidis	WP_001082123.1	100
AEF09473.1	Enteritidis	HAB3221920.1	99.569
AEF09473.1	Enteritidis	EBA1418534.1	99.569
AEF09473.1	Enteritidis	ECM1109917.1	99.569
AEF09473.1	Enteritidis	EDF2228816.1	99.569
AEF09473.1	Enteritidis	HAB3416520.1	99.569
AEF09473.1	Enteritidis	ECN8102864.1	99.569
AEF09473.1	Enteritidis	EBS3053632.1	99.569
AEF09473.1	Enteritidis	MCL8656453.1	99.569
AEF09473.1	Enteritidis	EDW9214953.1	99.569
AEF09474.1	Enteritidis	AUC34628.1	100
AEF09474.1	Enteritidis	MCD3179584.1	99.438
AEF09474.1	Enteritidis	EDI5489820.1	99.438
AEF09474.1	Enteritidis	EAY3313966.1	99.438
AEF09474.1	Enteritidis	AHQ32666.2	99.438
AEF09474.1	Enteritidis	ECB2508467.1	99.438
AEF09474.1	Enteritidis	EDD9818648.1	99.438
AEF09474.1	Enteritidis	EEF1311915.1	99.438
AEF09474.1	Enteritidis	ECV7973281.1	98.876
AEF09474.1	Enteritidis	EBV3172615.1	98.876
AEF09523.1	Enteritidis	WP_001079584.1	100
AEF09523.1	Enteritidis	ECU9015151.1	99.932
AEF09523.1	Enteritidis	EAZ9286814.1	99.932
AEF09523.1	Enteritidis	MCL8661156.1	99.932
AEF09523.1	Enteritidis	MCL8664767.1	99.726
AEF09523.1	Enteritidis	EAY3452744.1	99.863
AEF09523.1	Enteritidis	MCL9152409.1	99.247
AEF09523.1	Enteritidis	EDC7359296.1	99.247
AEF09523.1	Enteritidis	MCL9590614.1	99.179
AEF09523.1	Enteritidis	EEN4418896.1	99.179
AEF09588.1	Enteritidis	WP_001143053.1	100
AEF09588.1	Enteritidis	EDD4261840.1	99.895
AEF09588.1	Enteritidis	WP_001143033.1	99.895
AEF09588.1	Enteritidis	EDE3780367.1	99.895
AEF09588.1	Enteritidis	MCL8778946.1	99.895
AEF09588.1	Enteritidis	WP_022742846.1	99.895
AEF09588.1	Enteritidis	ECS6108416.1	99.895
AEF09588.1	Enteritidis	EDJ3510952.1	99.895
AEF09588.1	Enteritidis	MCL8719835.1	99.895
AEF09588.1	Enteritidis	WP_001143052.1	99.686
AEF09689.1	Enteritidis	WP_000867130.1	100
AEF09689.1	Enteritidis	ECG4008224.1	99.711
AEF09689.1	Enteritidis	ECN0329715.1	99.711
AEF09689.1	Enteritidis	WP_079786345.1	99.711
AEF09689.1	Enteritidis	EIX2387254.1	99.711
AEF09689.1	Enteritidis	EKD3646148.1	99.711
AEF09689.1	Enteritidis	HAC6089430.1	99.711
AEF09689.1	Enteritidis	ECS7623803.1	99.711
AEF09689.1	Enteritidis	EIO7236200.1	99.711
AEF09689.1	Enteritidis	ECD5647659.1	99.711
AEF09827.1	Enteritidis	EPI71665.1	100
AEF09827.1	Enteritidis	WP_000838828.1	100
AEF09827.1	Enteritidis	WP_000838827.1	99.565
AEF09827.1	Enteritidis	EEA2672579.1	99.565
AEF09827.1	Enteritidis	HAB1170573.1	99.565
AEF09827.1	Enteritidis	EBA0170900.1	99.565
AEF09827.1	Enteritidis	EBA1418772.1	99.565
AEF09827.1	Enteritidis	WP_079956903.1	99.565
AEF09827.1	Enteritidis	EBS2823637.1	99.565
AEF09827.1	Enteritidis	WP_000838829.1	99.565
AEF09863.1	Enteritidis	WP_000378721.1	100
AEF09863.1	Enteritidis	EBW8669776.1	99.559
AEF09863.1	Enteritidis	EEE8368547.1	99.559
AEF09863.1	Enteritidis	WP_079951952.1	99.559
AEF09863.1	Enteritidis	EBY9437122.1	99.559
AEF09863.1	Enteritidis	HAC6042197.1	99.559
AEF09863.1	Enteritidis	WP_000378722.1	99.559
AEF09863.1	Enteritidis	EBH2713136.1	99.559
AEF09863.1	Enteritidis	EGX4051238.1	99.559
AEF09863.1	Enteritidis	EDC7393754.1	99.559
AEF09974.1	Enteritidis	WP_000828129.1	100
AEF09974.1	Enteritidis	MJY20556.1	99.338
AEF09974.1	Enteritidis	EDM2009828.1	99.338
AEF09974.1	Enteritidis	EDL5235281.1	99.338
AEF09974.1	Enteritidis	HAB4288230.1	99.338
AEF09974.1	Enteritidis	ECH8062439.1	99.338
AEF09974.1	Enteritidis	EHN1299912.1	99.338
AEF09974.1	Enteritidis	ECM1536825.1	99.338
AEF09974.1	Enteritidis	WP_069044402.1	99.338
AEF09974.1	Enteritidis	WP_023226531.1	99.338
AEF09998.1	Enteritidis	WP_000368196.1	100
AEF09998.1	Enteritidis	MCL8931600.1	99.828
AEF09998.1	Enteritidis	MCL8742849.1	99.828
AEF09998.1	Enteritidis	EBB4919149.1	99.828
AEF09998.1	Enteritidis	EDE3780292.1	99.828
AEF09998.1	Enteritidis	EDA3978342.1	99.828
AEF09998.1	Enteritidis	EDA3969799.1	99.656
AEF09998.1	Enteritidis	MCL8680805.1	98.107
AEF09998.1	Enteritidis	WP_023232411.1	97.762
AEF09998.1	Enteritidis	MCL8993944.1	97.59
AEF10021.1	Enteritidis	AIN66740.1	100
AEF10021.1	Enteritidis	WP_001541297.1	100
AEF10021.1	Enteritidis	EDP2121850.1	100
AEF10021.1	Enteritidis	EAZ9452378.1	98.75
AEF10021.1	Enteritidis	EDH5868287.1	98.75
AEF10021.1	Enteritidis	EHD5132333.1	98.75
AEF10021.1	Enteritidis	EGS0277868.1	98.75
AEF10021.1	Enteritidis	EEA2671397.1	98.75
AEF10021.1	Enteritidis	WP_061201972.1	98.75
AEF10021.1	Enteritidis	WP_061426451.1	98.75
AEF10024.1	Enteritidis	WP_000750804.1	100
AEF10024.1	Enteritidis	WP_000750805.1	99.857
AEF10024.1	Enteritidis	HAC7967906.1	99.713
AEF10024.1	Enteritidis	EBN0188989.1	99.713
AEF10024.1	Enteritidis	EBH2714312.1	99.857
AEF10024.1	Enteritidis	EBS3278597.1	99.713
AEF10024.1	Enteritidis	EBZ9011249.1	99.713
AEF10024.1	Enteritidis	ECU9016393.1	99.857
AEF10024.1	Enteritidis	WP_023891106.1	99.713
AEF10024.1	Enteritidis	EDG7541903.1	99.713
AEF10030.1	Enteritidis	EPI67152.1	100
AEF10030.1	Enteritidis	WP_000973645.1	100
AEF10030.1	Enteritidis	EDJ7977398.1	99.779
AEF10030.1	Enteritidis	ECG4007131.1	99.779
AEF10030.1	Enteritidis	EBO3083252.1	99.779
AEF10030.1	Enteritidis	EGS8403453.1	99.779
AEF10030.1	Enteritidis	EBZ4516612.1	99.779
AEF10030.1	Enteritidis	ECM2843446.1	99.779
AEF10030.1	Enteritidis	HAB2691740.1	99.779
AEF10030.1	Enteritidis	EBV8561202.1	99.779
AEF10041.1	Enteritidis	WP_001039339.1	100
AEF10041.1	Enteritidis	EBM0637306.1	99.771
AEF10041.1	Enteritidis	WP_001039335.1	99.771
AEF10041.1	Enteritidis	WP_001039328.1	99.541
AEF10041.1	Enteritidis	MCL8648591.1	99.771
AEF10041.1	Enteritidis	HAC6525261.1	99.541
AEF10041.1	Enteritidis	MCL9220048.1	99.541
AEF10041.1	Enteritidis	EDE4818540.1	99.541
AEF10041.1	Enteritidis	WP_001039337.1	99.541
AEF10041.1	Enteritidis	EBA0168403.1	99.312
AEF10148.1	Enteritidis	EAY3452635.1	100
AEF10148.1	Enteritidis	WP_023139385.1	99.593
AEF10148.1	Enteritidis	WP_000727897.1	99.593
AEF10148.1	Enteritidis	WP_079833954.1	99.187
AEF10148.1	Enteritidis	EDC7359095.1	99.187
AEF10148.1	Enteritidis	EBW0391542.1	99.187
AEF10148.1	Enteritidis	EEE3986812.1	99.187
AEF10148.1	Enteritidis	WP_080177846.1	99.187
AEF10148.1	Enteritidis	ECN8935762.1	99.187
AEF10148.1	Enteritidis	EEE7873514.1	99.187
AEF10232.1	Enteritidis	WP_001232231.1	100
AEF10232.1	Enteritidis	MCL9156043.1	99.219
AEF10232.1	Enteritidis	EEE4101725.1	99.219
AEF10232.1	Enteritidis	ECQ4322875.1	99.219
AEF10232.1	Enteritidis	EDE1788831.1	99.219
AEF10232.1	Enteritidis	EDD5578250.1	99.219
AEF10232.1	Enteritidis	MBD6233614.1	99.219
AEF10232.1	Enteritidis	EBR7969543.1	99.219
AEF10232.1	Enteritidis	ECI2921793.1	99.219
AEF10232.1	Enteritidis	WP_001727680.1	99.219
AEF10334.1	Enteritidis	WP_001090314.1	100
AEF10334.1	Enteritidis	WP_001090312.1	99.346
AEF10334.1	Enteritidis	WP_001727651.1	99.346
AEF10334.1	Enteritidis	WP_154080373.1	99.346
AEF10334.1	Enteritidis	EBA1417817.1	99.346
AEF10334.1	Enteritidis	EDB4447397.1	99.346
AEF10334.1	Enteritidis	EBV1258642.1	99.346
AEF10334.1	Enteritidis	EGA8409164.1	99.346
AEF10334.1	Enteritidis	EDM7277207.1	98.693
AEF10334.1	Enteritidis	ECT6865847.1	99.346
AEF10350.1	Enteritidis	WP_000178963.1	100
AEF10350.1	Enteritidis	ECT4250015.1	99.512
AEF10350.1	Enteritidis	MCL8660134.1	100
AEF10350.1	Enteritidis	EBR9632177.1	99.512
AEF10350.1	Enteritidis	WP_185614086.1	99.512
AEF10350.1	Enteritidis	EIL1353835.1	99.512
AEF10350.1	Enteritidis	WP_023226898.1	99.512
AEF10350.1	Enteritidis	ECI2500292.1	99.512
AEF10350.1	Enteritidis	WP_000178962.1	99.512
AEF10350.1	Enteritidis	EBM0634374.1	99.512
AEF10361.1	Enteritidis	WP_000876250.1	100
AEF10361.1	Enteritidis	MCL8931957.1	99.875
AEF10361.1	Enteritidis	WP_000876244.1	99.875
AEF10361.1	Enteritidis	WP_000876247.1	99.626
AEF10361.1	Enteritidis	ECM3700373.1	99.751
AEF10361.1	Enteritidis	ECK2139100.1	99.751
AEF10361.1	Enteritidis	ECX1953696.1	99.751
AEF10361.1	Enteritidis	ECM0312748.1	99.751
AEF10361.1	Enteritidis	MCL9151725.1	99.751
AEF10361.1	Enteritidis	ECN6376640.1	99.626
AEF10364.1	Enteritidis	WP_000734706.1	100
AEF10364.1	Enteritidis	ECU9014776.1	99.563
AEF10364.1	Enteritidis	ECM0312751.1	99.563
AEF10364.1	Enteritidis	EDB4447427.1	97.817
AEF10364.1	Enteritidis	ECI2489190.1	97.38
AEF10364.1	Enteritidis	EDC7358882.1	97.38
AEF10364.1	Enteritidis	ECM3700370.1	96.507
AEF10364.1	Enteritidis	WP_000734707.1	97.38
AEF10364.1	Enteritidis	WP_000734708.1	96.943
AEF10364.1	Enteritidis	EDD5429097.1	96.507
AEF10380.1	Enteritidis	WP_001253768.1	100
AEF10380.1	Enteritidis	WP_001253766.1	99.723
AEF10380.1	Enteritidis	WP_080209102.1	99.446
AEF10380.1	Enteritidis	ECM5762359.1	99.446
AEF10380.1	Enteritidis	EIQ3328162.1	99.446
AEF10380.1	Enteritidis	WP_185614088.1	99.446
AEF10380.1	Enteritidis	EEE7954792.1	99.446
AEF10380.1	Enteritidis	EGQ5115434.1	99.446
AEF10380.1	Enteritidis	EBK2535337.1	99.446
AEF10380.1	Enteritidis	EGQ4708346.1	99.446
AEF10382.1	Enteritidis	WP_001160706.1	100
AEF10382.1	Enteritidis	EDE1801419.1	99.882
AEF10382.1	Enteritidis	EIL1353807.1	99.882
AEF10382.1	Enteritidis	EDE4818209.1	99.882
AEF10382.1	Enteritidis	EEL6050430.1	99.882
AEF10382.1	Enteritidis	EBR0331849.1	99.763
AEF10382.1	Enteritidis	WP_001160707.1	99.882
AEF10382.1	Enteritidis	WP_023232162.1	99.763
AEF10382.1	Enteritidis	EEM8010217.1	99.763
AEF10382.1	Enteritidis	EBA1417766.1	99.882
AEF10383.1	Enteritidis	WP_000680512.1	100
AEF10383.1	Enteritidis	MCL9157185.1	99.559
AEF10383.1	Enteritidis	WP_000680522.1	99.559
AEF10383.1	Enteritidis	EDE1856578.1	99.559
AEF10383.1	Enteritidis	EDB4984661.1	99.119
AEF10383.1	Enteritidis	ECA2636303.1	99.119
AEF10383.1	Enteritidis	EBR9489550.1	99.559
AEF10383.1	Enteritidis	ECZ5232031.1	99.119
AEF10383.1	Enteritidis	EDD3118278.1	99.119
AEF10383.1	Enteritidis	MCL9151747.1	99.119
AEF10384.1	Enteritidis	WP_000482239.1	100
AEF10384.1	Enteritidis	WP_000482248.1	99.448
AEF10384.1	Enteritidis	EEN5246249.1	99.448
AEF10384.1	Enteritidis	EDB9814412.1	99.448
AEF10384.1	Enteritidis	ECN7768663.1	99.448
AEF10384.1	Enteritidis	WP_023226891.1	99.448
AEF10384.1	Enteritidis	WP_001727855.1	99.448
AEF10384.1	Enteritidis	EDR1782149.1	99.448
AEF10384.1	Enteritidis	EBH2514518.1	99.448
AEF10384.1	Enteritidis	EDF4237098.1	99.448
AEF05955.1	Hadar	WP_000743357.1	100
AEF05955.1	Hadar	EBV6284234.1	99.444
AEF05955.1	Hadar	EDP8924376.1	99.444
AEF05955.1	Hadar	EDW6336591.1	98.889
AEF05955.1	Hadar	EEM3063034.1	99.444
AEF05955.1	Hadar	WP_065312550.1	100
AEF05956.1	Hadar	WP_000742551.1	100
AEF05956.1	Hadar	WP_000739906.1	99.561
AEF05956.1	Hadar	EBQ8909962.1	99.561
AEF05956.1	Hadar	WP_000742558.1	99.561
AEF05956.1	Hadar	EEJ5141066.1	99.123
AEF05956.1	Hadar	EBV6284233.1	99.561
AEF05956.1	Hadar	EDP8924375.1	98.649
AEF05956.1	Hadar	WP_023228626.1	49.772
AEF05956.1	Hadar	EDZ36485.1	49.772
AEF05956.1	Hadar	UAF39388.1	49.315
AEF05957.1	Hadar	EDV4907300.1	100
AEF05957.1	Hadar	WP_001245857.1	99.771
AEF05957.1	Hadar	EDZ35559.1	99.771
AEF05957.1	Hadar	EEI1232426.1	99.656
AEF05957.1	Hadar	EEF5306695.1	99.656
AEF05957.1	Hadar	EBV6393638.1	99.656
AEF05957.1	Hadar	EDP8924374.1	99.542
AEF05957.1	Hadar	EIO9984534.1	99.542
AEF05957.1	Hadar	EDU4074099.1	99.542
AEF05957.1	Hadar	HAE6975363.1	99.313
AEF05959.1	Hadar	EDV4907298.1	100
AEF05959.1	Hadar	WP_001082038.1	99.448
AEF05959.1	Hadar	EDU5440309.1	98.895
AEF05959.1	Hadar	EIO9984532.1	98.895
AEF05959.1	Hadar	EDP8924372.1	98.895
AEF05959.1	Hadar	EBZ8319472.1	98.895
AEF05959.1	Hadar	EBV1618519.1	98.895
AEF05959.1	Hadar	EDZ35562.1	99.405
AEF05960.1	Hadar	WP_001243232.1	100
AEF05960.1	Hadar	EBV6284229.1	99.419
AEF05960.1	Hadar	EDN4230606.1	99.419
AEF05960.1	Hadar	EDW6336586.1	98.837
AEF05960.1	Hadar	EDP8924371.1	98.837
AEF05960.1	Hadar	EDU5440310.1	98.256
AEF05960.1	Hadar	WP_079837999.1	100
AEF05960.1	Hadar	WP_176166959.1	96.875
AEF06109.1	Hadar	EBV6998035.1	100
AEF06109.1	Hadar	WP_000794042.1	99.721
AEF06109.1	Hadar	WP_000794041.1	99.443
AEF06109.1	Hadar	HBL9842882.1	99.443
AEF06109.1	Hadar	EKR2263576.1	99.443
AEF06109.1	Hadar	HAE6975208.1	98.886
AEF06109.1	Hadar	EBQ8911011.1	99.164
AEF06109.1	Hadar	EBV6284080.1	86.908
AEF06109.1	Hadar	EIO9984382.1	86.63
AEF06109.1	Hadar	EDU4076166.1	85.237
AEF06110.1	Hadar	EDV4907598.1	100
AEF06110.1	Hadar	WP_001231783.1	99.292
AEF06110.1	Hadar	EIO9984381.1	98.821
AEF06110.1	Hadar	EBV6998034.1	98.821
AEF06110.1	Hadar	WP_023238182.1	98.939
AEF06110.1	Hadar	EDU4076167.1	98.821
AEF06110.1	Hadar	UAF39731.1	98.821
AEF06110.1	Hadar	EBV3831270.1	98.703
AEF06110.1	Hadar	HAE6975207.1	98.703
AEF06110.1	Hadar	WP_001231770.1	98.821
AEF06111.1	Hadar	WP_001086408.1	99.559
AEF06111.1	Hadar	HAE6975206.1	99.119
AEF06111.1	Hadar	EBV3831269.1	99.119
AEF06111.1	Hadar	EIO9984380.1	99.119
AEF06111.1	Hadar	WP_001086413.1	98.678
AEF06111.1	Hadar	WP_001086401.1	98.678
AEF06111.1	Hadar	EDU5436491.1	98.678
AEF06111.1	Hadar	EDW6336064.1	98.238
AEF06111.1	Hadar	EBV6998033.1	98.238
AEF06111.1	Hadar	WP_079837837.1	98.238
AEF06112.1	Hadar	WP_000777532.1	100
AEF06112.1	Hadar	EDS0301445.1	99.441
AEF06112.1	Hadar	EDS4287436.1	100
AEF06112.1	Hadar	HAE6975205.1	98.324
AEF06112.1	Hadar	WP_000777530.1	98.883
AEF06112.1	Hadar	EBV9643348.1	100
AEF06112.1	Hadar	EIO9984379.1	97.765
AEF06112.1	Hadar	WP_131039023.1	97.765
AEF06112.1	Hadar	TSF37412.1	98.851
AEF06112.1	Hadar	ECS2179939.1	100
AEF06126.1	Hadar	WP_000113220.1	100
AEF06126.1	Hadar	EBS5602804.1	99.863
AEF06126.1	Hadar	HCM4598580.1	99.863
AEF06126.1	Hadar	EDP8921781.1	99.863
AEF06126.1	Hadar	HAE6975191.1	99.726
AEF06126.1	Hadar	EDU5436643.1	99.726
AEF06126.1	Hadar	EDU4076190.1	99.726
AEF06126.1	Hadar	EBV6284056.1	99.726
AEF06126.1	Hadar	EDZ34104.1	100
AEF06126.1	Hadar	WP_010835134.1	74.801
AEF06130.1	Hadar	EBV6998006.1	100
AEF06130.1	Hadar	WP_001090553.1	99.462
AEF06130.1	Hadar	EBV6915440.1	98.925
AEF06130.1	Hadar	WP_001090556.1	98.925
AEF06130.1	Hadar	WP_080180906.1	98.925
AEF06130.1	Hadar	EKQ9940936.1	99.457
AEF06130.1	Hadar	EBW0517684.1	100
AEF06130.1	Hadar	WP_053220624.1	99.248
AEF06130.1	Hadar	KNS78579.1	98.485
AEF06130.1	Hadar	WP_153257402.1	100
AEF06144.1	Hadar	WP_000753958.1	100
AEF06144.1	Hadar	ECF1836604.1	99.789
AEF06144.1	Hadar	EBV5910099.1	99.789
AEF06144.1	Hadar	HAE6975173.1	99.789
AEF06144.1	Hadar	EDP8921799.1	99.368
AEF06144.1	Hadar	WP_080206850.1	100
AEF06144.1	Hadar	EEJ2623337.1	100
AEF06144.1	Hadar	EDP8925298.1	56.276
AEF06144.1	Hadar	WP_080150384.1	56.785
AEF06144.1	Hadar	EBV6996806.1	56.276
AEF06159.1	Hadar	WP_001240935.1	100
AEF06159.1	Hadar	WP_001240929.1	99.876
AEF06159.1	Hadar	EFP3140297.1	99.876
AEF06159.1	Hadar	EBX2085970.1	99.876
AEF06159.1	Hadar	WP_058342588.1	99.876
AEF06159.1	Hadar	EDP8921814.1	99.254
AEF06159.1	Hadar	WP_001240922.1	99.129
AEF06159.1	Hadar	EBV6997977.1	99.129
AEF06159.1	Hadar	HAE6975158.1	98.881
AEF06159.1	Hadar	WP_053220620.1	100
AEF06160.1	Hadar	WP_000758966.1	100
AEF06168.1	Hadar	WP_000524168.1	100
AEF06168.1	Hadar	EDU5436679.1	99.83
AEF06168.1	Hadar	EBV6997968.1	99.83
AEF06168.1	Hadar	WP_000524169.1	99.83
AEF06168.1	Hadar	EDV4907505.1	99.83
AEF06168.1	Hadar	HAE6975149.1	99.659
AEF06168.1	Hadar	EBV6284020.1	99.659
AEF06168.1	Hadar	WP_239828139.1	99.656
AEF06168.1	Hadar	WP_080183001.1	99.821
AEF06168.1	Hadar	EBX2085961.1	99.803
AEF06179.1	Hadar	WP_001202315.1	100
AEF06208.1	Hadar	WP_000119443.1	100
AEF06208.1	Hadar	WP_020978740.1	99.379
AEF06208.1	Hadar	UAF39638.1	99.379
AEF06208.1	Hadar	EGM7262039.1	98.758
AEF06208.1	Hadar	EBV6285664.1	98.758
AEF06208.1	Hadar	EDQ4082041.1	99.379
AEF06208.1	Hadar	WP_046341575.1	100
AEF06208.1	Hadar	EDW6335258.1	98.758
AEF06208.1	Hadar	WP_080206931.1	98.758
AEF06208.1	Hadar	WP_052938435.1	96.894
AEF06232.1	Hadar	WP_001535430.1	100
AEF06232.1	Hadar	HCB5777381.1	100
AEF06232.1	Hadar	ECT2445440.1	100
AEF06232.1	Hadar	WP_023228802.1	99.578
AEF06232.1	Hadar	TSG95977.1	99.578
AEF06232.1	Hadar	WP_079843583.1	99.578
AEF06232.1	Hadar	EJW6581563.1	100
AEF06232.1	Hadar	TRF79475.1	98.734
AEF06232.1	Hadar	WP_238706508.1	98.734
AEF06232.1	Hadar	EHH1373685.1	100
AEF06233.1	Hadar	EDV4908798.1	100
AEF06233.1	Hadar	WP_023228801.1	99.761
AEF06233.1	Hadar	WP_079830964.1	99.641
AEF06233.1	Hadar	EBS2284171.1	99.641
AEF06233.1	Hadar	WP_000669636.1	99.522
AEF06233.1	Hadar	EBV1881271.1	99.043
AEF06233.1	Hadar	EIO9987049.1	99.043
AEF06233.1	Hadar	EBV6285636.1	98.804
AEF06233.1	Hadar	EDP8926106.1	98.804
AEF06233.1	Hadar	EDU5440628.1	98.684
AEF06234.1	Hadar	EBQ8909061.1	100
AEF06234.1	Hadar	EDP8926105.1	99.359
AEF06234.1	Hadar	WP_080195877.1	98.718
AEF06234.1	Hadar	EBV1881270.1	98.077
AEF06234.1	Hadar	EBS2284170.1	98.077
AEF06234.1	Hadar	EDU4075734.1	97.436
AEF06234.1	Hadar	WP_000266946.1	96.129
AEF06234.1	Hadar	WP_000266930.1	95.484
AEF06234.1	Hadar	UAF39618.1	94.839
AEF06234.1	Hadar	EBV6285635.1	95.484
AEF06253.1	Hadar	EDV4906479.1	100
AEF06253.1	Hadar	WP_001043667.1	99.714
AEF06253.1	Hadar	EDU5438731.1	99.429
AEF06253.1	Hadar	EBX2082808.1	99.429
AEF06253.1	Hadar	EBS2284151.1	99.429
AEF06253.1	Hadar	EDW6335208.1	99.429
AEF06253.1	Hadar	EHH3968374.1	99.429
AEF06253.1	Hadar	EBV6997667.1	99.429
AEF06253.1	Hadar	WP_094965403.1	99.143
AEF06253.1	Hadar	HAE6977443.1	99.143
AEF06269.1	Hadar	EDV4906441.1	99.532
AEF06269.1	Hadar	HAE6977416.1	99.415
AEF06269.1	Hadar	WP_000075322.1	99.181
AEF06269.1	Hadar	EDP8925026.1	99.298
AEF06269.1	Hadar	EBV1881162.1	99.298
AEF06269.1	Hadar	EBV9084996.1	99.064
AEF06269.1	Hadar	EBZ2465534.1	99.064
AEF06269.1	Hadar	EEJ4030947.1	99.064
AEF06269.1	Hadar	EBV6997587.1	99.181
AEF06269.1	Hadar	WP_080150732.1	99.181
AEF06271.1	Hadar	WP_000062035.1	100
AEF06271.1	Hadar	EDP8925024.1	99.438
AEF06271.1	Hadar	EBS2284131.1	99.438
AEF06271.1	Hadar	WP_000062036.1	98.876
AEF06271.1	Hadar	EDU5438723.1	98.315
AEF06271.1	Hadar	EDS4287405.1	98.315
AEF06271.1	Hadar	WP_131043444.1	98.315
AEF06277.1	Hadar	WP_000830237.1	99.425
AEF06277.1	Hadar	WP_000830239.1	98.851
AEF06277.1	Hadar	EDP8925019.1	98.851
AEF06277.1	Hadar	EEJ5140352.1	98.276
AEF06277.1	Hadar	HAE9024744.1	98.901
AEF06295.1	Hadar	EDV4906415.1	100
AEF06295.1	Hadar	EBV6997560.1	99.715
AEF06295.1	Hadar	UAF39563.1	99.715
AEF06295.1	Hadar	WP_106777674.1	99.573
AEF06295.1	Hadar	EBV6285552.1	99.715
AEF06295.1	Hadar	EDW6335176.1	99.573
AEF06295.1	Hadar	EDP8925001.1	99.288
AEF06295.1	Hadar	WP_139377241.1	99.288
AEF06295.1	Hadar	EDU5438476.1	99.43
AEF06295.1	Hadar	EDU4075675.1	99.43
AEF06344.1	Hadar	WP_000752021.1	100
AEF06344.1	Hadar	ECA8426495.1	99.652
AEF06441.1	Hadar	WP_000152869.1	100
AEF06441.1	Hadar	WP_000152862.1	99.735
AEF06441.1	Hadar	EDU4074944.1	99.735
AEF06441.1	Hadar	ECU1933896.1	99.735
AEF06441.1	Hadar	EBV6285924.1	99.735
AEF06441.1	Hadar	EBV6998688.1	99.469
AEF06441.1	Hadar	EDU9341469.1	100
AEF06441.1	Hadar	EDU9341712.1	100
AEF06475.1	Hadar	EDV4907354.1	100
AEF06475.1	Hadar	WP_000681032.1	98.919
AEF06475.1	Hadar	UAF39390.1	98.919
AEF06475.1	Hadar	WP_000681034.1	98.378
AEF06475.1	Hadar	EBV6998655.1	98.378
AEF06475.1	Hadar	HAE6977062.1	98.378
AEF06475.1	Hadar	EDP8924913.1	98.378
AEF06475.1	Hadar	WP_000875671.1	97.838
AEF06475.1	Hadar	EBZ2466118.1	97.297
AEF06475.1	Hadar	EDU5250770.1	97.297
AEF06478.1	Hadar	EDV4907351.1	100
AEF06478.1	Hadar	EBV6998652.1	99.425
AEF06478.1	Hadar	WP_080150831.1	99.31
AEF06478.1	Hadar	EBV6285905.1	99.31
AEF06478.1	Hadar	EDW6335015.1	99.425
AEF06478.1	Hadar	UAF39387.1	99.31
AEF06478.1	Hadar	WP_000754223.1	99.195
AEF06478.1	Hadar	EDU5438289.1	99.195
AEF06478.1	Hadar	EDU4074981.1	99.08
AEF06478.1	Hadar	EDV3871803.1	99.08
AEF06480.1	Hadar	EDU4074983.1	100
AEF06480.1	Hadar	WP_000577507.1	99.419
AEF06480.1	Hadar	EDP8924918.1	99.419
AEF06480.1	Hadar	WP_000577508.1	98.837
AEF06480.1	Hadar	WP_000577505.1	98.837
AEF06480.1	Hadar	EDU5438287.1	98.256
AEF06480.1	Hadar	EBQ9134730.1	98.256
AEF06480.1	Hadar	EBV6285903.1	97.093
AEF06499.1	Hadar	EBV6998631.1	99.848
AEF06499.1	Hadar	EBQ8908728.1	99.695
AEF06499.1	Hadar	WP_000192425.1	99.39
AEF06499.1	Hadar	WP_023228678.1	99.238
AEF06499.1	Hadar	EBZ2437249.1	99.238
AEF06499.1	Hadar	EBV6719288.1	99.238
AEF06499.1	Hadar	EBV6681445.1	99.238
AEF06499.1	Hadar	EDP8925232.1	98.78
AEF06499.1	Hadar	HAE6976277.1	98.78
AEF06499.1	Hadar	EBV3829685.1	98.78
AEF06514.1	Hadar	EBS2283882.1	100
AEF06514.1	Hadar	WP_001523354.1	99.867
AEF06514.1	Hadar	WP_001034952.1	99.734
AEF06514.1	Hadar	EDP8925240.1	99.601
AEF06514.1	Hadar	HAE6976269.1	99.734
AEF06514.1	Hadar	UAF39360.1	99.601
AEF06514.1	Hadar	WP_001034965.1	99.334
AEF06514.1	Hadar	EBQ8908713.1	99.467
AEF06514.1	Hadar	EDU4075016.1	99.467
AEF06514.1	Hadar	EGF4618544.1	99.201
AEF06556.1	Hadar	EDV4905078.1	99.474
AEF06556.1	Hadar	WP_000289055.1	98.947
AEF06556.1	Hadar	EDP8924752.1	98.947
AEF06556.1	Hadar	WP_001623090.1	97.895
AEF06556.1	Hadar	ECY4181782.1	97.368
AEF06556.1	Hadar	KTW58411.1	98.925
AEF06556.1	Hadar	EDZ36656.1	98.925
AEF06556.1	Hadar	EDU3008894.1	97.368
AEF06556.1	Hadar	TSH04986.1	96.842
AEF06556.1	Hadar	EDN4649505.1	99.419
AEF06668.1	Hadar	EDZ33790.1	100
AEF06668.1	Hadar	WP_001562341.1	100
AEF06668.1	Hadar	WP_001539503.1	99.535
AEF06668.1	Hadar	ECT2790224.1	99.767
AEF06668.1	Hadar	EBV6234588.1	99.767
AEF06668.1	Hadar	EDP8926195.1	99.767
AEF06668.1	Hadar	WP_131064562.1	99.767
AEF06668.1	Hadar	EED4802546.1	100
AEF06668.1	Hadar	EED4802566.1	100
AEF06670.1	Hadar	WP_000097552.1	100
AEF06670.1	Hadar	WP_000097553.1	99.618
AEF06670.1	Hadar	HAE6976122.1	99.618
AEF06670.1	Hadar	WP_080151615.1	99.237
AEF06670.1	Hadar	EBV6286218.1	99.237
AEF06670.1	Hadar	EDU4075163.1	99.237
AEF06670.1	Hadar	EDU5437400.1	98.855
AEF06670.1	Hadar	EED4802591.1	100
AEF06670.1	Hadar	ECS5319985.1	85.263
AEF06670.1	Hadar	HCB5764838.1	100
AEF06700.1	Hadar	WP_001094775.1	100
AEF06700.1	Hadar	WP_001094776.1	99.766
AEF06700.1	Hadar	EDU4075194.1	99.532
AEF06700.1	Hadar	EDU5437422.1	99.532
AEF06700.1	Hadar	HAE6978857.1	99.532
AEF06700.1	Hadar	ECS5323992.1	99.766
AEF06700.1	Hadar	EDW6337152.1	99.297
AEF06700.1	Hadar	EBV6286195.1	99.063
AEF06700.1	Hadar	EED4802091.1	100
AEF06700.1	Hadar	EED4802006.1	100
AEF06743.1	Hadar	WP_000838671.1	100
AEF06743.1	Hadar	WP_000838673.1	99.597
AEF06743.1	Hadar	ECB6606935.1	99.194
AEF06743.1	Hadar	WP_000761628.1	34.978
AEF06743.1	Hadar	WP_000761634.1	34.685
AEF06743.1	Hadar	HAE6978758.1	35.426
AEF06743.1	Hadar	EBS2284950.1	34.978
AEF06743.1	Hadar	EDV4906832.1	34.234
AEF06743.1	Hadar	ECT2745523.1	33.607
AEF06743.1	Hadar	WP_000756586.1	33.607
AEF06746.1	Hadar	WP_000716763.1	100
AEF06801.1	Hadar	WP_000737538.1	100
AEF06801.1	Hadar	EDW6337052.1	99.588
AEF06801.1	Hadar	EDU5438097.1	99.588
AEF06801.1	Hadar	EDP8924278.1	99.588
AEF06801.1	Hadar	EBZ2466649.1	100
AEF06801.1	Hadar	ECT2745523.1	63.9
AEF06801.1	Hadar	WP_000756586.1	63.485
AEF06801.1	Hadar	EGG7438778.1	63.071
AEF06801.1	Hadar	EDP8924275.1	63.485
AEF06801.1	Hadar	EDV4904587.1	57.317
AEF06804.1	Hadar	WP_000756586.1	100
AEF06804.1	Hadar	EGG7438778.1	99.588
AEF06804.1	Hadar	EDP8924275.1	99.588
AEF06804.1	Hadar	ECT2745523.1	99.588
AEF06804.1	Hadar	WP_000737538.1	63.485
AEF06804.1	Hadar	EDW6337052.1	63.485
AEF06804.1	Hadar	EDP8924278.1	63.485
AEF06804.1	Hadar	EDU5438097.1	63.485
AEF06804.1	Hadar	EBZ2466649.1	63.333
AEF06804.1	Hadar	WP_000727897.1	55.328
AEF06836.1	Hadar	WP_001519746.1	100
AEF06853.1	Hadar	EDV4907742.1	100
AEF06853.1	Hadar	WP_000792301.1	99.605
AEF06853.1	Hadar	HAE6979269.1	99.209
AEF06853.1	Hadar	EBV4321892.1	99.603
AEF06853.1	Hadar	WP_140027713.1	98.814
AEF06853.1	Hadar	EIX1120250.1	99.602
AEF06853.1	Hadar	TSF85666.1	99.597
AEF06853.1	Hadar	EEN2080132.1	99.595
AEF06853.1	Hadar	TSG99056.1	99.59
AEF06853.1	Hadar	EKR9565932.1	99.583
AEF06873.1	Hadar	WP_000977713.1	100
AEF06873.1	Hadar	WP_000977709.1	99.725
AEF06873.1	Hadar	WP_000977710.1	99.449
AEF06873.1	Hadar	EBV6283786.1	99.449
AEF06873.1	Hadar	EDS7982845.1	99.448
AEF06873.1	Hadar	EBV7975762.1	99.44
AEF06873.1	Hadar	EDS4288263.1	99.153
AEF06873.1	Hadar	ECS2799194.1	99.143
AEF06873.1	Hadar	EDX3197563.1	99.422
AEF06873.1	Hadar	WP_053220608.1	99.2
AEF06900.1	Hadar	WP_000798705.1	100
AEF06900.1	Hadar	EIP6731587.1	99.329
AEF06900.1	Hadar	EBX4130492.1	98.658
AEF06900.1	Hadar	WP_000798708.1	98.658
AEF06900.1	Hadar	WP_254866499.1	100
AEF06900.1	Hadar	EBS2287884.1	86.577
AEF06900.1	Hadar	ECU7444407.1	100
AEF06900.1	Hadar	ECT7163468.1	100
AEF06900.1	Hadar	ECT7163466.1	100
AEF06917.1	Hadar	EBV6997229.1	98.492
AEF06917.1	Hadar	WP_000372075.1	87.297
AEF06917.1	Hadar	EDS0301613.1	87.297
AEF06917.1	Hadar	ECG6889647.1	87.297
AEF06917.1	Hadar	WP_080183045.1	87.195
AEF06917.1	Hadar	WP_000372077.1	87.195
AEF06917.1	Hadar	EBW3061052.1	87.093
AEF06917.1	Hadar	EBV7717281.1	87.093
AEF06917.1	Hadar	HCM3466515.1	87.093
AEF06917.1	Hadar	EDV4908681.1	87.5
AEF06919.1	Hadar	EDV4908875.1	100
AEF06919.1	Hadar	EBV6997231.1	98.788
AEF06920.1	Hadar	WP_000877926.1	100
AEF06920.1	Hadar	MBJ2592354.1	100
AEF06920.1	Hadar	WP_000826822.1	58.48
AEF06920.1	Hadar	EBV6283372.1	58.48
AEF06920.1	Hadar	WP_000826825.1	57.895
AEF06920.1	Hadar	WP_080081793.1	57.895
AEF06920.1	Hadar	WP_000826819.1	57.895
AEF06920.1	Hadar	WP_000826818.1	57.895
AEF06926.1	Hadar	EDU5439240.1	97.414
AEF06926.1	Hadar	ECD4918496.1	95.567
AEF06926.1	Hadar	EBQ8911237.1	95.567
AEF06926.1	Hadar	EBX4130520.1	95.443
AEF06926.1	Hadar	EBS3747312.1	95.32
AEF06926.1	Hadar	WP_001144666.1	95.443
AEF06926.1	Hadar	ECT5964390.1	95.32
AEF06926.1	Hadar	EBV7903006.1	95.074
AEF06926.1	Hadar	ECY3911222.1	94.834
AEF06926.1	Hadar	KKD90982.1	93.596
AEF06947.1	Hadar	WP_001674965.1	100
AEF06947.1	Hadar	EDS4344545.1	99.714
AEF06947.1	Hadar	EDX8846378.1	99.714
AEF06947.1	Hadar	ECG6890030.1	99.714
AEF06947.1	Hadar	WP_001670727.1	99.714
AEF06947.1	Hadar	EBV6283770.1	99.143
AEF06947.1	Hadar	WP_024133336.1	100
AEF06947.1	Hadar	ECB3104465.1	100
AEF06947.1	Hadar	ECB3103854.1	100
AEF06958.1	Hadar	WP_000859419.1	100
AEF06958.1	Hadar	WP_000859416.1	99.451
AEF06958.1	Hadar	EDP8925666.1	98.901
AEF06958.1	Hadar	EDW6335633.1	98.901
AEF06958.1	Hadar	EBV6283759.1	98.352
AEF06958.1	Hadar	EBW1342611.1	98.901
AEF06958.1	Hadar	HAE6978126.1	97.802
AEF06958.1	Hadar	WP_080151218.1	97.253
AEF06958.1	Hadar	EDU4076040.1	97.802
AEF06958.1	Hadar	EDU5438396.1	97.802
AEF06964.1	Hadar	WP_001123045.1	100
AEF06964.1	Hadar	HAE6818566.1	100
AEF06964.1	Hadar	HAE6978132.1	99.656
AEF06964.1	Hadar	EKQ9941312.1	100
AEF06964.1	Hadar	EDS0301656.1	98.282
AEF06964.1	Hadar	WP_080151215.1	97.938
AEF06964.1	Hadar	EBV6283753.1	97.595
AEF06964.1	Hadar	UAF38872.1	97.595
AEF06964.1	Hadar	EDW6335639.1	97.595
AEF06964.1	Hadar	EDU5438391.1	97.251
AEF07006.1	Hadar	WP_000700610.1	100
AEF07006.1	Hadar	WP_000700608.1	99.565
AEF07006.1	Hadar	WP_135633616.1	99.565
AEF07006.1	Hadar	EJX1130697.1	99.565
AEF07006.1	Hadar	EDR2582052.1	99.565
AEF07006.1	Hadar	EBV6283709.1	97.826
AEF07006.1	Hadar	EBV1619570.1	100
AEF07006.1	Hadar	EGG7442397.1	99.539
AEF07006.1	Hadar	ECV5305001.1	100
AEF07006.1	Hadar	EIU9792247.1	100
AEF07017.1	Hadar	WP_000791655.1	100
AEF07017.1	Hadar	EBQ9329288.1	99.338
AEF07017.1	Hadar	EBV6997333.1	99.338
AEF07017.1	Hadar	EBV6283697.1	99.338
AEF07017.1	Hadar	EBW8705298.1	99.338
AEF07018.1	Hadar	WP_000771416.1	100
AEF07018.1	Hadar	EBV6283696.1	99.338
AEF07078.1	Hadar	EDV4904332.1	100
AEF07078.1	Hadar	WP_000008403.1	99.724
AEF07078.1	Hadar	WP_000008399.1	99.309
AEF07078.1	Hadar	WP_017466045.1	99.171
AEF07078.1	Hadar	EDT5698666.1	99.171
AEF07078.1	Hadar	EDU4075306.1	99.171
AEF07078.1	Hadar	HAE6977745.1	99.171
AEF07078.1	Hadar	EDW6335758.1	99.309
AEF07078.1	Hadar	EDP8921879.1	99.171
AEF07078.1	Hadar	WP_023209856.1	99.033
AEF07117.1	Hadar	EDV4904372.1	100
AEF07117.1	Hadar	WP_001532066.1	99.422
AEF07117.1	Hadar	EBV8653419.1	98.844
AEF07117.1	Hadar	EDP8921922.1	98.266
AEF07117.1	Hadar	EBV6283578.1	97.688
AEF07117.1	Hadar	WP_080150891.1	97.11
AEF07117.1	Hadar	EDW6337165.1	97.11
AEF07117.1	Hadar	EIN7025946.1	98.969
AEF07120.1	Hadar	WP_000789471.1	100
AEF07120.1	Hadar	WP_135633625.1	99.459
AEF07120.1	Hadar	EBS2284525.1	99.459
AEF07120.1	Hadar	WP_000789466.1	99.459
AEF07120.1	Hadar	WP_023226910.1	99.459
AEF07120.1	Hadar	EDP8921925.1	98.378
AEF07120.1	Hadar	ECT2529545.1	99.451
AEF07120.1	Hadar	EHN8959898.1	99.448
AEF07120.1	Hadar	EBV6283573.1	97.838
AEF07120.1	Hadar	EEJ2627149.1	100
AEF07157.1	Hadar	WP_000163762.1	100
AEF07157.1	Hadar	UAF38638.1	99.597
AEF07157.1	Hadar	EDX5418669.1	99.597
AEF07157.1	Hadar	ECA1805963.1	100
AEF07157.1	Hadar	EBV6860857.1	100
AEF07157.1	Hadar	WP_139818089.1	100
AEF07157.1	Hadar	WP_139817948.1	100
AEF07198.1	Hadar	WP_000770981.1	100
AEF07198.1	Hadar	EDT5701717.1	100
AEF07198.1	Hadar	EDZ34182.1	100
AEF07198.1	Hadar	HCB5768669.1	100
AEF07198.1	Hadar	ECY4088619.1	100
AEF07198.1	Hadar	ECY4090613.1	100
AEF07299.1	Hadar	WP_000007299.1	99.482
AEF07299.1	Hadar	HAE6977269.1	98.964
AEF07299.1	Hadar	WP_000007300.1	98.964
AEF07299.1	Hadar	WP_000007294.1	98.964
AEF07299.1	Hadar	UAF38501.1	98.446
AEF07299.1	Hadar	EKS3327675.1	98.964
AEF07299.1	Hadar	EBR0232266.1	81.771
AEF07299.1	Hadar	WP_000122629.1	43.961
AEF07299.1	Hadar	EDV4905354.1	43.478
AEF07299.1	Hadar	WP_000122632.1	43.478
AEF07313.1	Hadar	WP_000597179.1	100
AEF07313.1	Hadar	WP_000621211.1	99.355
AEF07313.1	Hadar	WP_046340505.1	99.355
AEF07339.1	Hadar	EDV4908076.1	99.735
AEF07339.1	Hadar	EDU4072361.1	94.517
AEF07339.1	Hadar	HAE6977313.1	93.995
AEF07339.1	Hadar	EDW6337841.1	93.995
AEF07339.1	Hadar	EBV6995305.1	89.323
AEF07339.1	Hadar	WP_000824320.1	89.583
AEF07339.1	Hadar	EIO9986831.1	89.323
AEF07339.1	Hadar	WP_000824304.1	88.66
AEF07339.1	Hadar	UAF38461.1	89.323
AEF07339.1	Hadar	EBV6283337.1	89.323
AEF07350.1	Hadar	ASE73645.1	100
AEF07350.1	Hadar	WP_000756314.1	100
AEF07350.1	Hadar	EBV6283324.1	98.78
AEF07350.1	Hadar	WP_129336019.1	98.78
AEF07350.1	Hadar	UAF38450.1	97.561
AEF07350.1	Hadar	WP_000756313.1	97.561
AEF07350.1	Hadar	ECD6593339.1	95.122
AEF07350.1	Hadar	WP_023231952.1	93.976
AEF07350.1	Hadar	EBV6995318.1	86.747
AEF07350.1	Hadar	EDP8924030.1	85.542
AEF07365.1	Hadar	WP_000975516.1	100
AEF07365.1	Hadar	EDU4072391.1	99.02
AEF07365.1	Hadar	EBV6283309.1	99.02
AEF07365.1	Hadar	EDZ37439.1	100
AEF07365.1	Hadar	HAE2626704.1	100
AEF07365.1	Hadar	HAE9025637.1	100
AEF07397.1	Hadar	WP_000758335.1	100
AEF07397.1	Hadar	EBY1760799.1	99.731
AEF07397.1	Hadar	EDP8924210.1	99.731
AEF07397.1	Hadar	WP_023228733.1	99.731
AEF07397.1	Hadar	WP_080150674.1	99.462
AEF07397.1	Hadar	EBV8856435.1	100
AEF07397.1	Hadar	EDU5440757.1	71.768
AEF07397.1	Hadar	WP_079838112.1	100
AEF07397.1	Hadar	WP_000865521.1	61.082
AEF07397.1	Hadar	EDU4074914.1	60.567
AEF07442.1	Hadar	WP_000769035.1	100
AEF07442.1	Hadar	WP_000769037.1	99.724
AEF07442.1	Hadar	ECV3884627.1	99.724
AEF07442.1	Hadar	EBX2084086.1	99.724
AEF07442.1	Hadar	WP_080150628.1	99.171
AEF07442.1	Hadar	ECV5303030.1	99.72
AEF07442.1	Hadar	TSF77094.1	100
AEF07442.1	Hadar	EEJ2626832.1	100
AEF07442.1	Hadar	EBY9221029.1	99.713
AEF07442.1	Hadar	EBV9825155.1	100
AEF07457.1	Hadar	EDV4905196.1	99.858
AEF07457.1	Hadar	WP_080150602.1	99.717
AEF07457.1	Hadar	EBV6283216.1	99.575
AEF07457.1	Hadar	WP_000692043.1	99.575
AEF07457.1	Hadar	EDW6336924.1	99.433
AEF07457.1	Hadar	EDZ37810.1	99.575
AEF07457.1	Hadar	EBV6995423.1	99.433
AEF07457.1	Hadar	EDS6166774.1	99.433
AEF07457.1	Hadar	EDP8924152.1	99.433
AEF07457.1	Hadar	EBS5522522.1	99.433
AEF07604.1	Hadar	WP_000714799.1	100
AEF07604.1	Hadar	EBV6283054.1	99.528
AEF07604.1	Hadar	EBV6995578.1	99.528
AEF07604.1	Hadar	EDU5438325.1	99.057
AEF07604.1	Hadar	WP_000714798.1	98.585
AEF07604.1	Hadar	WP_080150456.1	98.113
AEF07604.1	Hadar	EBV6260432.1	98.113
AEF07604.1	Hadar	HCB5764668.1	98.578
AEF07604.1	Hadar	EEJ2626944.1	98.068
AEF07768.1	Hadar	ASE76458.1	100
AEF07768.1	Hadar	WP_000939597.1	100
AEF07768.1	Hadar	EDR2690272.1	99.682
AEF07768.1	Hadar	EBV6282895.1	99.682
AEF07768.1	Hadar	EED4800562.1	100
AEF07866.1	Hadar	EDV4908853.1	100
AEF07866.1	Hadar	HAE6979388.1	98.241
AEF07866.1	Hadar	WP_001080662.1	97.236
AEF07866.1	Hadar	EGR8194295.1	96.985
AEF07866.1	Hadar	EBV9032840.1	97.229
AEF07866.1	Hadar	WP_046340983.1	96.734
AEF07866.1	Hadar	ECT2026714.1	97.215
AEF07866.1	Hadar	HAE6819857.1	97.208
AEF07866.1	Hadar	ECS5349907.1	97.201
AEF07866.1	Hadar	EGG7442416.1	96.947
AEF07875.1	Hadar	EBW2989296.1	95.761
AEF07875.1	Hadar	EDD6595109.1	95.183
AEF07875.1	Hadar	MBJ2943091.1	90.559
AEF07875.1	Hadar	EDV4908864.1	95.516
AEF07875.1	Hadar	WP_023200332.1	81.346
AEF07875.1	Hadar	WP_052894876.1	81.154
AEF07875.1	Hadar	EBV7066761.1	81.154
AEF07875.1	Hadar	ECU6939316.1	81.154
AEF07875.1	Hadar	EJN0374220.1	80.962
AEF07875.1	Hadar	WP_058342595.1	76.641
AEF07926.1	Hadar	EDZ37664.1	99.823
AEF07926.1	Hadar	EBV6995850.1	100
AEF07926.1	Hadar	WP_077906045.1	99.823
AEF07926.1	Hadar	EBV5287120.1	99.645
AEF07926.1	Hadar	ECD6590914.1	99.645
AEF07926.1	Hadar	EBS2284900.1	99.645
AEF07926.1	Hadar	WP_080151045.1	99.468
AEF07926.1	Hadar	WP_077904895.1	99.113
AEF07926.1	Hadar	EDU4072919.1	99.291
AEF07926.1	Hadar	UAF42786.1	98.936
AEF08065.1	Hadar	EDV4906204.1	100
AEF08065.1	Hadar	WP_000765280.1	99.701
AEF08065.1	Hadar	EHY9401131.1	99.403
AEF08065.1	Hadar	TSG97637.1	99.701
AEF08065.1	Hadar	HBZ1693508.1	99.403
AEF08065.1	Hadar	EJE9033515.1	99.694
AEF08065.1	Hadar	EDN4650759.1	99.691
AEF08065.1	Hadar	WP_000825916.1	33.718
AEF08065.1	Hadar	UAF42113.1	32.853
AEF08065.1	Hadar	EBV6282650.1	32.853
AEF08066.1	Hadar	EDV4906205.1	100
AEF08066.1	Hadar	WP_000945363.1	99.759
AEF08066.1	Hadar	EBU6757736.1	99.638
AEF08066.1	Hadar	HBL9814753.1	99.638
AEF08066.1	Hadar	EBS3873609.1	99.638
AEF08066.1	Hadar	EDT5701003.1	99.633
AEF08066.1	Hadar	HAE9025764.1	99.712
AEF08066.1	Hadar	EDP8922226.1	79.131
AEF08066.1	Hadar	WP_000945356.1	79.131
AEF08066.1	Hadar	EBV6282649.1	62.165
AEF08116.1	Hadar	EDV4907146.1	100
AEF08116.1	Hadar	WP_000488252.1	99.849
AEF08116.1	Hadar	WP_000488254.1	99.849
AEF08116.1	Hadar	EDU4075820.1	99.698
AEF08116.1	Hadar	EBV6996045.1	99.548
AEF08116.1	Hadar	UAF42063.1	99.548
AEF08116.1	Hadar	WP_095462684.1	99.698
AEF08116.1	Hadar	WP_000488245.1	99.548
AEF08116.1	Hadar	EDU5436902.1	99.548
AEF08116.1	Hadar	EDW6336850.1	99.095
AEF08173.1	Hadar	WP_000835182.1	100
AEF08173.1	Hadar	EED8226404.1	99.329
AEF08173.1	Hadar	ECS5320036.1	93.22
AEF08184.1	Hadar	WP_000865526.1	100
AEF08184.1	Hadar	EDW6338557.1	99.735
AEF08184.1	Hadar	WP_058818783.1	99.735
AEF08184.1	Hadar	EDU4074914.1	99.206
AEF08184.1	Hadar	EBX2086911.1	100
AEF08184.1	Hadar	EBV6284883.1	98.942
AEF08184.1	Hadar	EDU5439525.1	98.942
AEF08184.1	Hadar	WP_000865521.1	98.677
AEF08184.1	Hadar	HAE9026358.1	100
AEF08184.1	Hadar	EFR6883340.1	71.543
AEF08270.1	Hadar	WP_000731868.1	100
AEF08270.1	Hadar	EDW7434148.1	99.615
AEF08270.1	Hadar	EDU4074827.1	99.615
AEF08270.1	Hadar	EBW3544896.1	99.615
AEF08270.1	Hadar	ECS5889723.1	99.615
AEF08270.1	Hadar	WP_000754423.1	67.954
AEF08270.1	Hadar	WP_000754422.1	67.954
AEF08270.1	Hadar	EDP8922602.1	67.568
AEF08270.1	Hadar	EEJ4033954.1	67.568
AEF08270.1	Hadar	EDR9707972.1	67.568
AEF08271.1	Hadar	WP_000754423.1	100
AEF08271.1	Hadar	EEJ4033954.1	99.615
AEF08271.1	Hadar	EDP8922602.1	99.615
AEF08271.1	Hadar	WP_000754422.1	99.615
AEF08271.1	Hadar	EDR9707972.1	99.615
AEF08271.1	Hadar	EFU9332731.1	99.615
AEF08271.1	Hadar	EDW7434148.1	67.954
AEF08271.1	Hadar	EBW3544896.1	67.954
AEF08271.1	Hadar	WP_000731868.1	70.339
AEF08271.1	Hadar	EDU4074827.1	70.339
AEF08307.1	Hadar	EBI0144632.1	100
AEF08307.1	Hadar	EDU4074793.1	99.771
AEF08307.1	Hadar	HAE6976599.1	99.771
AEF08307.1	Hadar	EBV6284762.1	99.771
AEF08307.1	Hadar	EDU5437315.1	99.542
AEF08307.1	Hadar	WP_001518618.1	100
AEF08307.1	Hadar	UAF41890.1	99.77
AEF08307.1	Hadar	WP_080206747.1	99.767
AEF08310.1	Hadar	EDV4907952.1	100
AEF08310.1	Hadar	WP_000716006.1	99.679
AEF08310.1	Hadar	EDU4074790.1	99.359
AEF08310.1	Hadar	WP_000716011.1	99.359
AEF08310.1	Hadar	EBV6284746.1	99.359
AEF08310.1	Hadar	HAE6976596.1	99.038
AEF08310.1	Hadar	EDP8922563.1	99.038
AEF08310.1	Hadar	EDU5437318.1	99.038
AEF08310.1	Hadar	UAF41887.1	98.718
AEF08310.1	Hadar	WP_000716010.1	98.718
AEF08334.1	Hadar	WP_000722926.1	100
AEF08334.1	Hadar	EDU5436487.1	99.605
AEF08334.1	Hadar	WP_000722930.1	99.605
AEF08334.1	Hadar	EEI4088447.1	99.209
AEF08334.1	Hadar	EBV6284721.1	98.814
AEF08334.1	Hadar	EDW6339082.1	98.814
AEF08334.1	Hadar	WP_031615447.1	99.2
AEF08334.1	Hadar	EDS4286276.1	99.19
AEF08334.1	Hadar	HAE6816474.1	99.507
AEF08334.1	Hadar	ESH02297.1	99.457
AEF08399.1	Hadar	WP_000331877.1	100
AEF08399.1	Hadar	ECA6401158.1	99.709
AEF08399.1	Hadar	HAE6976038.1	99.709
AEF08399.1	Hadar	EDW6338852.1	99.709
AEF08399.1	Hadar	WP_000331869.1	99.709
AEF08399.1	Hadar	ECY4092332.1	100
AEF08399.1	Hadar	EDQ3902730.1	100
AEF08399.1	Hadar	EID1371000.1	100
AEF08399.1	Hadar	EID1370665.1	100
AEF08399.1	Hadar	EDQ3901789.1	100
AEF08424.1	Hadar	EED8225419.1	96.861
AEF08424.1	Hadar	EBV6998253.1	96.861
AEF08424.1	Hadar	HAE6976012.1	94.949
AEF08424.1	Hadar	WP_071825578.1	95.397
AEF08424.1	Hadar	WP_076741718.1	94.654
AEF08424.1	Hadar	UAF41738.1	92.507
AEF08424.1	Hadar	WP_140027730.1	90.318
AEF08424.1	Hadar	EDI0610544.1	88.506
AEF08424.1	Hadar	EBV6069502.1	88.41
AEF08424.1	Hadar	WP_071586449.1	88.458
AEF08425.1	Hadar	EDV4906298.1	99.946
AEF08425.1	Hadar	WP_071786181.1	99.41
AEF08425.1	Hadar	EBX2342343.1	99.357
AEF08425.1	Hadar	ESH07568.1	99.354
AEF08425.1	Hadar	WP_000375794.1	97.212
AEF08425.1	Hadar	EIO9985475.1	95.769
AEF08425.1	Hadar	HAE6976010.1	95.447
AEF08425.1	Hadar	EBV6998251.1	95.282
AEF08425.1	Hadar	EDU4074677.1	93.894
AEF08425.1	Hadar	WP_080185600.1	93.412
AEF08431.1	Hadar	WP_000409190.1	100
AEF08431.1	Hadar	EHS5268974.1	99.515
AEF08431.1	Hadar	EBW1344646.1	99.515
[truncated: 3,770 more rows]

## Sheet: Accession Numbers Table 4
Accession Table 4: NCBI Accession numbers of Salmonella enterica subspecies enterica serovar assemblies used in epitope positive homology BLASTp alignment analysis
NCBI GenBank Assembly Accession Number	Salmonella enterica subspecies enterica Serovar
GCA_000009505.1	Enteritidis
GCA_000280075.1	Enteritidis
GCA_000280095.1	Enteritidis
GCA_000280115.1	Enteritidis
GCA_000280135.1	Enteritidis
GCA_000280155.1	Enteritidis
GCA_000280175.1	Enteritidis
GCA_000280195.1	Enteritidis
GCA_000280215.1	Enteritidis
GCA_000280235.1	Enteritidis
GCA_000280255.1	Enteritidis
GCA_000280275.1	Enteritidis
GCA_000280295.1	Enteritidis
GCA_000280315.2	Enteritidis
GCA_000280335.1	Enteritidis
GCA_000280355.1	Enteritidis
GCA_000280375.1	Enteritidis
GCA_000280395.1	Enteritidis
GCA_000280415.1	Enteritidis
GCA_000280435.1	Enteritidis
GCA_000280455.1	Enteritidis
GCA_000280475.1	Enteritidis
GCA_000313715.2	Enteritidis
GCA_000328985.1	Enteritidis
GCA_000329005.1	Enteritidis
GCA_000329025.1	Enteritidis
GCA_000329045.1	Enteritidis
GCA_000329065.1	Enteritidis
GCA_000329085.1	Enteritidis
GCA_000329105.1	Enteritidis
GCA_000329125.1	Enteritidis
GCA_000329145.1	Enteritidis
GCA_000329165.1	Enteritidis
GCA_000329185.1	Enteritidis
GCA_000329205.1	Enteritidis
GCA_000329225.1	Enteritidis
GCA_000329245.1	Enteritidis
GCA_000329265.1	Enteritidis
GCA_000329285.1	Enteritidis
GCA_000329305.1	Enteritidis
GCA_000329325.1	Enteritidis
GCA_000329345.1	Enteritidis
GCA_000329365.2	Enteritidis
GCA_000329385.1	Enteritidis
GCA_000329405.1	Enteritidis
GCA_000329425.1	Enteritidis
GCA_000329445.1	Enteritidis
GCA_000329465.1	Enteritidis
GCA_000329485.1	Enteritidis
GCA_000329505.1	Enteritidis
GCA_000329525.1	Enteritidis
GCA_000329545.1	Enteritidis
GCA_000329565.1	Enteritidis
GCA_000329585.1	Enteritidis
GCA_000329605.1	Enteritidis
GCA_000329625.1	Enteritidis
GCA_000329645.1	Enteritidis
GCA_000329665.1	Enteritidis
GCA_000329685.1	Enteritidis
GCA_000329705.1	Enteritidis
GCA_000329725.1	Enteritidis
GCA_000329745.1	Enteritidis
GCA_000329765.1	Enteritidis
GCA_000329785.1	Enteritidis
GCA_000329805.1	Enteritidis
GCA_000329825.1	Enteritidis
GCA_000329845.1	Enteritidis
GCA_000329865.1	Enteritidis
GCA_000329885.1	Enteritidis
GCA_000329905.1	Enteritidis
GCA_000329925.1	Enteritidis
GCA_000329945.1	Enteritidis
GCA_000329965.1	Enteritidis
GCA_000329985.1	Enteritidis
GCA_000330005.1	Enteritidis
GCA_000330025.1	Enteritidis
GCA_000330045.1	Enteritidis
GCA_000330065.1	Enteritidis
GCA_000330085.1	Enteritidis
GCA_000330105.1	Enteritidis
GCA_000330125.1	Enteritidis
GCA_000330145.1	Enteritidis
GCA_000330165.1	Enteritidis
GCA_000330185.1	Enteritidis
GCA_000330205.1	Enteritidis
GCA_000330225.1	Enteritidis
GCA_000330245.1	Enteritidis
GCA_000330265.1	Enteritidis
GCA_000330285.1	Enteritidis
GCA_000330305.1	Enteritidis
GCA_000330325.1	Enteritidis
GCA_000330345.1	Enteritidis
GCA_000330365.1	Enteritidis
GCA_000330385.1	Enteritidis
GCA_000330405.1	Enteritidis
GCA_000330425.1	Enteritidis
GCA_000330445.1	Enteritidis
GCA_000330465.1	Enteritidis
GCA_000330525.1	Enteritidis
GCA_000330545.1	Enteritidis
GCA_000330565.1	Enteritidis
GCA_000330585.1	Enteritidis
GCA_000335855.1	Enteritidis
GCA_000335875.1	Enteritidis
GCA_000335875.2	Enteritidis
GCA_000335895.1	Enteritidis
GCA_000336055.1	Enteritidis
GCA_000336075.1	Enteritidis
GCA_000336095.1	Enteritidis
GCA_000336115.1	Enteritidis
GCA_000414765.1	Enteritidis
GCA_000414765.2	Enteritidis
GCA_000414785.1	Enteritidis
GCA_000414785.2	Enteritidis
GCA_000414805.1	Enteritidis
GCA_000414805.2	Enteritidis
GCA_000414825.1	Enteritidis
GCA_000414825.2	Enteritidis
GCA_000414845.1	Enteritidis
GCA_000414845.2	Enteritidis
GCA_000414865.1	Enteritidis
GCA_000414865.2	Enteritidis
GCA_000414885.1	Enteritidis
GCA_000414885.2	Enteritidis
GCA_000414905.1	Enteritidis
GCA_000414905.2	Enteritidis
GCA_000414925.1	Enteritidis
GCA_000414925.2	Enteritidis
GCA_000465535.1	Enteritidis
GCA_000505105.1	Enteritidis
GCA_000612325.1	Enteritidis
GCA_000623055.1	Enteritidis
GCA_000623055.2	Enteritidis
GCA_000623075.1	Enteritidis
GCA_000623075.2	Enteritidis
GCA_000623095.1	Enteritidis
GCA_000623095.2	Enteritidis
GCA_000623115.1	Enteritidis
GCA_000623115.2	Enteritidis
GCA_000623135.1	Enteritidis
GCA_000623135.2	Enteritidis
GCA_000623155.1	Enteritidis
GCA_000623155.2	Enteritidis
GCA_000623175.1	Enteritidis
GCA_000623175.2	Enteritidis
GCA_000623195.1	Enteritidis
GCA_000623195.2	Enteritidis
GCA_000623215.1	Enteritidis
GCA_000623215.2	Enteritidis
GCA_000623235.1	Enteritidis
GCA_000623235.2	Enteritidis
GCA_000623255.1	Enteritidis
GCA_000623255.2	Enteritidis
GCA_000623275.1	Enteritidis
GCA_000623295.1	Enteritidis
GCA_000623315.1	Enteritidis
GCA_000623335.1	Enteritidis
GCA_000623355.1	Enteritidis
GCA_000623375.1	Enteritidis
GCA_000623395.1	Enteritidis
GCA_000623395.2	Enteritidis
GCA_000623415.1	Enteritidis
GCA_000623415.2	Enteritidis
GCA_000623435.1	Enteritidis
GCA_000623435.2	Enteritidis
GCA_000623455.1	Enteritidis
GCA_000623455.2	Enteritidis
GCA_000623475.1	Enteritidis
GCA_000623475.2	Enteritidis
GCA_000623495.1	Enteritidis
GCA_000623495.2	Enteritidis
GCA_000623515.1	Enteritidis
GCA_000623515.2	Enteritidis
GCA_000623535.1	Enteritidis
GCA_000623535.2	Enteritidis
GCA_000623555.1	Enteritidis
GCA_000623555.2	Enteritidis
GCA_000623575.1	Enteritidis
GCA_000623575.2	Enteritidis
GCA_000623595.1	Enteritidis
GCA_000623595.2	Enteritidis
GCA_000623615.1	Enteritidis
GCA_000623615.2	Enteritidis
GCA_000623635.1	Enteritidis
GCA_000623635.2	Enteritidis
GCA_000623655.1	Enteritidis
GCA_000623655.2	Enteritidis
GCA_000623675.1	Enteritidis
GCA_000623675.2	Enteritidis
GCA_000623695.1	Enteritidis
GCA_000623695.2	Enteritidis
GCA_000623715.1	Enteritidis
GCA_000623715.2	Enteritidis
GCA_000623735.1	Enteritidis
GCA_000623735.2	Enteritidis
GCA_000623755.1	Enteritidis
GCA_000623755.2	Enteritidis
GCA_000623775.1	Enteritidis
GCA_000623775.2	Enteritidis
GCA_000623795.1	Enteritidis
GCA_000623795.2	Enteritidis
GCA_000623815.1	Enteritidis
GCA_000623815.2	Enteritidis
GCA_000623835.1	Enteritidis
GCA_000623835.2	Enteritidis
GCA_000623855.1	Enteritidis
GCA_000623855.2	Enteritidis
GCA_000623875.1	Enteritidis
GCA_000623875.2	Enteritidis
GCA_000623895.1	Enteritidis
GCA_000623895.2	Enteritidis
GCA_000623915.1	Enteritidis
GCA_000623915.2	Enteritidis
GCA_000623935.1	Enteritidis
GCA_000623935.2	Enteritidis
GCA_000623955.1	Enteritidis
GCA_000623955.2	Enteritidis
GCA_000623975.1	Enteritidis
GCA_000623975.2	Enteritidis
GCA_000623995.1	Enteritidis
GCA_000623995.2	Enteritidis
GCA_000624015.1	Enteritidis
GCA_000624015.2	Enteritidis
GCA_000624035.1	Enteritidis
GCA_000624035.2	Enteritidis
GCA_000624055.1	Enteritidis
GCA_000624055.2	Enteritidis
GCA_000624075.1	Enteritidis
GCA_000624075.2	Enteritidis
GCA_000624095.1	Enteritidis
GCA_000624095.2	Enteritidis
GCA_000624115.1	Enteritidis
GCA_000624115.2	Enteritidis
GCA_000624135.1	Enteritidis
GCA_000624135.2	Enteritidis
GCA_000624155.1	Enteritidis
GCA_000624155.2	Enteritidis
GCA_000624175.1	Enteritidis
GCA_000624175.2	Enteritidis
GCA_000624195.1	Enteritidis
GCA_000624195.2	Enteritidis
GCA_000624215.1	Enteritidis
GCA_000624215.2	Enteritidis
GCA_000624235.1	Enteritidis
GCA_000624235.2	Enteritidis
GCA_000624255.1	Enteritidis
GCA_000624255.2	Enteritidis
GCA_000624275.1	Enteritidis
GCA_000624275.2	Enteritidis
GCA_000624295.1	Enteritidis
GCA_000624295.2	Enteritidis
GCA_000624315.1	Enteritidis
GCA_000624315.2	Enteritidis
GCA_000624335.1	Enteritidis
GCA_000624335.2	Enteritidis
GCA_000624355.1	Enteritidis
GCA_000624355.2	Enteritidis
GCA_000624375.1	Enteritidis
GCA_000624375.2	Enteritidis
GCA_000624395.1	Enteritidis
GCA_000624395.2	Enteritidis
GCA_000624415.1	Enteritidis
GCA_000624415.2	Enteritidis
GCA_000624435.1	Enteritidis
GCA_000624435.2	Enteritidis
GCA_000624455.1	Enteritidis
GCA_000624455.2	Enteritidis
GCA_000624475.1	Enteritidis
GCA_000624475.2	Enteritidis
GCA_000624495.1	Enteritidis
GCA_000624495.2	Enteritidis
GCA_000624515.1	Enteritidis
GCA_000624515.2	Enteritidis
GCA_000624535.1	Enteritidis
GCA_000624535.2	Enteritidis
GCA_000624555.1	Enteritidis
GCA_000624555.2	Enteritidis
GCA_000624575.1	Enteritidis
GCA_000624575.2	Enteritidis
GCA_000624595.1	Enteritidis
GCA_000624595.2	Enteritidis
GCA_000624615.1	Enteritidis
GCA_000624615.2	Enteritidis
GCA_000624635.1	Enteritidis
GCA_000624635.2	Enteritidis
GCA_000624655.1	Enteritidis
GCA_000624655.2	Enteritidis
GCA_000624675.1	Enteritidis
GCA_000624675.2	Enteritidis
GCA_000624695.1	Enteritidis
GCA_000624695.2	Enteritidis
GCA_000624715.1	Enteritidis
GCA_000624715.2	Enteritidis
GCA_000624735.1	Enteritidis
GCA_000624735.2	Enteritidis
GCA_000624755.1	Enteritidis
GCA_000624755.2	Enteritidis
GCA_000624775.1	Enteritidis
GCA_000624775.2	Enteritidis
GCA_000624795.1	Enteritidis
GCA_000624795.2	Enteritidis
GCA_000624815.1	Enteritidis
GCA_000624815.2	Enteritidis
GCA_000624835.1	Enteritidis
GCA_000624835.2	Enteritidis
GCA_000624855.1	Enteritidis
GCA_000624855.2	Enteritidis
GCA_000624875.1	Enteritidis
GCA_000624875.2	Enteritidis
GCA_000624895.1	Enteritidis
GCA_000624895.2	Enteritidis
GCA_000624915.1	Enteritidis
GCA_000624915.2	Enteritidis
GCA_000624935.1	Enteritidis
GCA_000624935.2	Enteritidis
GCA_000624955.1	Enteritidis
GCA_000624955.2	Enteritidis
GCA_000624975.1	Enteritidis
GCA_000624975.2	Enteritidis
GCA_000624995.1	Enteritidis
GCA_000624995.2	Enteritidis
GCA_000625015.1	Enteritidis
GCA_000625015.2	Enteritidis
GCA_000625035.1	Enteritidis
GCA_000625035.2	Enteritidis
GCA_000625055.1	Enteritidis
GCA_000625055.2	Enteritidis
GCA_000625075.1	Enteritidis
GCA_000625075.2	Enteritidis
GCA_000625095.1	Enteritidis
GCA_000625095.2	Enteritidis
GCA_000625115.1	Enteritidis
GCA_000625115.2	Enteritidis
GCA_000625135.1	Enteritidis
GCA_000625135.2	Enteritidis
GCA_000625155.1	Enteritidis
GCA_000625155.2	Enteritidis
GCA_000625175.1	Enteritidis
GCA_000625175.2	Enteritidis
GCA_000625195.1	Enteritidis
GCA_000625195.2	Enteritidis
GCA_000625215.1	Enteritidis
GCA_000625215.2	Enteritidis
GCA_000625235.1	Enteritidis
GCA_000625235.2	Enteritidis
GCA_000625255.1	Enteritidis
GCA_000625255.2	Enteritidis
GCA_000625275.1	Enteritidis
GCA_000625275.2	Enteritidis
GCA_000625295.1	Enteritidis
GCA_000625295.2	Enteritidis
GCA_000625315.1	Enteritidis
GCA_000625315.2	Enteritidis
GCA_000625335.1	Enteritidis
GCA_000625335.2	Enteritidis
GCA_000625355.1	Enteritidis
GCA_000625355.2	Enteritidis
GCA_000625375.1	Enteritidis
GCA_000625375.2	Enteritidis
GCA_000625395.1	Enteritidis
GCA_000625395.2	Enteritidis
GCA_000625415.1	Enteritidis
GCA_000625415.2	Enteritidis
GCA_000625435.1	Enteritidis
GCA_000625435.2	Enteritidis
GCA_000625455.1	Enteritidis
GCA_000625455.2	Enteritidis
GCA_000625475.1	Enteritidis
GCA_000625475.2	Enteritidis
GCA_000625495.1	Enteritidis
GCA_000625495.2	Enteritidis
GCA_000625515.1	Enteritidis
GCA_000625515.2	Enteritidis
GCA_000625535.1	Enteritidis
GCA_000625535.2	Enteritidis
GCA_000625555.1	Enteritidis
GCA_000625555.2	Enteritidis
GCA_000625575.1	Enteritidis
GCA_000625575.2	Enteritidis
GCA_000625595.1	Enteritidis
GCA_000625595.2	Enteritidis
GCA_000625615.1	Enteritidis
GCA_000625615.2	Enteritidis
GCA_000625635.1	Enteritidis
GCA_000625635.2	Enteritidis
GCA_000625655.1	Enteritidis
GCA_000625655.2	Enteritidis
GCA_000625675.1	Enteritidis
GCA_000625675.2	Enteritidis
GCA_000625695.1	Enteritidis
GCA_000625695.2	Enteritidis
GCA_000625715.1	Enteritidis
GCA_000625715.2	Enteritidis
GCA_000625735.1	Enteritidis
GCA_000625735.2	Enteritidis
GCA_000625755.1	Enteritidis
GCA_000625755.2	Enteritidis
GCA_000625775.1	Enteritidis
GCA_000625775.2	Enteritidis
GCA_000625795.1	Enteritidis
GCA_000625795.2	Enteritidis
GCA_000625815.1	Enteritidis
GCA_000625815.2	Enteritidis
GCA_000625835.1	Enteritidis
GCA_000625835.2	Enteritidis
GCA_000625855.1	Enteritidis
GCA_000625855.2	Enteritidis
GCA_000625875.1	Enteritidis
GCA_000625875.2	Enteritidis
GCA_000625895.1	Enteritidis
GCA_000625895.2	Enteritidis
GCA_000625915.1	Enteritidis
GCA_000625915.2	Enteritidis
GCA_000625935.1	Enteritidis
GCA_000625935.2	Enteritidis
GCA_000625955.1	Enteritidis
GCA_000625955.2	Enteritidis
GCA_000625975.1	Enteritidis
GCA_000625975.2	Enteritidis
GCA_000625995.1	Enteritidis
GCA_000625995.2	Enteritidis
GCA_000626015.1	Enteritidis
GCA_000626015.2	Enteritidis
GCA_000626035.1	Enteritidis
GCA_000626035.2	Enteritidis
GCA_000626055.1	Enteritidis
GCA_000626055.2	Enteritidis
GCA_000626075.1	Enteritidis
GCA_000626075.2	Enteritidis
GCA_000626095.1	Enteritidis
GCA_000626095.2	Enteritidis
GCA_000626115.1	Enteritidis
GCA_000626115.2	Enteritidis
GCA_000626135.1	Enteritidis
GCA_000626135.2	Enteritidis
GCA_000626155.1	Enteritidis
GCA_000626155.2	Enteritidis
GCA_000626175.1	Enteritidis
GCA_000626195.1	Enteritidis
GCA_000626215.1	Enteritidis
GCA_000626235.1	Enteritidis
GCA_000626255.1	Enteritidis
GCA_000626275.1	Enteritidis
GCA_000626275.2	Enteritidis
GCA_000626295.1	Enteritidis
GCA_000626315.1	Enteritidis
GCA_000626335.1	Enteritidis
GCA_000626355.1	Enteritidis
GCA_000626375.1	Enteritidis
GCA_000626395.1	Enteritidis
GCA_000626395.2	Enteritidis
GCA_000626415.1	Enteritidis
GCA_000626415.2	Enteritidis
GCA_000626435.1	Enteritidis
GCA_000626435.2	Enteritidis
GCA_000626455.1	Enteritidis
GCA_000626475.1	Enteritidis
GCA_000626475.2	Enteritidis
GCA_000626495.1	Enteritidis
GCA_000626495.2	Enteritidis
GCA_000626515.1	Enteritidis
GCA_000626515.2	Enteritidis
GCA_000626535.1	Enteritidis
GCA_000626535.2	Enteritidis
GCA_000626555.1	Enteritidis
GCA_000626555.2	Enteritidis
GCA_000626695.1	Enteritidis
GCA_000626695.2	Enteritidis
GCA_000750215.1	Enteritidis
GCA_000750255.1	Enteritidis
GCA_000750295.1	Enteritidis
GCA_000750335.1	Enteritidis
GCA_000750375.1	Enteritidis
GCA_000750395.1	Enteritidis
GCA_000750395.2	Enteritidis
GCA_000750415.1	Enteritidis
GCA_000750415.2	Enteritidis
GCA_000750435.1	Enteritidis
GCA_000750455.1	Enteritidis
GCA_000750475.1	Enteritidis
GCA_000750495.1	Enteritidis
GCA_000754375.1	Enteritidis
GCA_000831025.1	Enteritidis
GCA_000831025.2	Enteritidis
GCA_000831045.1	Enteritidis
GCA_000831045.2	Enteritidis
GCA_000968775.1	Enteritidis
GCA_000968775.2	Enteritidis
GCA_000968795.1	Enteritidis
GCA_000968795.2	Enteritidis
GCA_000973935.1	Enteritidis
GCA_000974045.1	Enteritidis
GCA_001102865.1	Enteritidis
GCA_001185215.1	Enteritidis
GCA_001185245.1	Enteritidis
GCA_001238365.1	Enteritidis
GCA_001240255.1	Enteritidis
GCA_001240265.1	Enteritidis
GCA_001243345.1	Enteritidis
GCA_001245355.1	Enteritidis
GCA_001245855.1	Enteritidis
GCA_001271415.1	Enteritidis
GCA_001271425.1	Enteritidis
GCA_001271485.1	Enteritidis
GCA_001271495.1	Enteritidis
GCA_001271575.1	Enteritidis
GCA_001271615.1	Enteritidis
GCA_001271675.1	Enteritidis
GCA_001271685.1	Enteritidis
GCA_001271735.1	Enteritidis
GCA_001271895.1	Enteritidis
GCA_001271905.1	Enteritidis
GCA_001271955.1	Enteritidis
GCA_001271975.1	Enteritidis
GCA_001272015.1	Enteritidis
GCA_001272125.1	Enteritidis
GCA_001272175.1	Enteritidis
GCA_001272215.1	Enteritidis
GCA_001272255.1	Enteritidis
GCA_001272285.1	Enteritidis
GCA_001272455.1	Enteritidis
GCA_001272485.1	Enteritidis
GCA_001280185.1	Enteritidis
GCA_001305235.1	Enteritidis
GCA_001456405.1	Enteritidis
GCA_001478145.1	Enteritidis
GCA_001478845.1	Enteritidis
GCA_001479035.1	Enteritidis
GCA_001479885.1	Enteritidis
GCA_001484025.1	Enteritidis
GCA_001597875.1	Enteritidis
GCA_001643395.1	Enteritidis
GCA_001647045.1	Enteritidis
GCA_001655705.1	Enteritidis
GCA_001691655.1	Enteritidis
GCA_001691665.1	Enteritidis
GCA_001691675.1	Enteritidis
GCA_001713515.1	Enteritidis
GCA_001713515.2	Enteritidis
GCA_001713745.1	Enteritidis
GCA_001713755.1	Enteritidis
GCA_001713775.1	Enteritidis
GCA_001713785.1	Enteritidis
GCA_001713825.1	Enteritidis
GCA_001713835.1	Enteritidis
GCA_001713855.1	Enteritidis
GCA_001713875.1	Enteritidis
GCA_001713905.1	Enteritidis
GCA_001713915.1	Enteritidis
GCA_001713945.1	Enteritidis
GCA_001713955.1	Enteritidis
GCA_001713985.1	Enteritidis
GCA_001713995.1	Enteritidis
GCA_001714015.1	Enteritidis
GCA_001714025.1	Enteritidis
GCA_001714065.1	Enteritidis
GCA_001714075.1	Enteritidis
GCA_001714095.1	Enteritidis
GCA_001714125.1	Enteritidis
GCA_001714145.1	Enteritidis
GCA_001714165.1	Enteritidis
GCA_001714175.1	Enteritidis
GCA_001714185.1	Enteritidis
GCA_001714225.1	Enteritidis
GCA_001714245.1	Enteritidis
GCA_001714255.1	Enteritidis
GCA_001714265.1	Enteritidis
GCA_001714305.1	Enteritidis
GCA_001714325.1	Enteritidis
GCA_001972545.1	Enteritidis
GCA_001972545.2	Enteritidis
GCA_001972555.1	Enteritidis
GCA_001972565.1	Enteritidis
GCA_001972575.1	Enteritidis
GCA_001972625.1	Enteritidis
GCA_001972625.2	Enteritidis
GCA_001972635.1	Enteritidis
GCA_001972645.1	Enteritidis
GCA_001972675.1	Enteritidis
GCA_001972705.1	Enteritidis
GCA_001972715.1	Enteritidis
GCA_001972725.1	Enteritidis
GCA_001972735.1	Enteritidis
GCA_001972785.1	Enteritidis
GCA_001972795.1	Enteritidis
GCA_001972815.1	Enteritidis
GCA_001972835.1	Enteritidis
GCA_001972865.1	Enteritidis
GCA_001972875.1	Enteritidis
GCA_001972905.1	Enteritidis
GCA_001972915.1	Enteritidis
GCA_001972945.1	Enteritidis
GCA_001972955.1	Enteritidis
GCA_001972985.1	Enteritidis
GCA_001972995.1	Enteritidis
GCA_001973025.1	Enteritidis
GCA_001973035.1	Enteritidis
GCA_001973065.1	Enteritidis
GCA_001973085.1	Enteritidis
GCA_001973105.1	Enteritidis
GCA_001973115.1	Enteritidis
GCA_001973145.1	Enteritidis
GCA_001973165.1	Enteritidis
GCA_001973185.1	Enteritidis
GCA_001973195.1	Enteritidis
GCA_001973225.1	Enteritidis
GCA_001973245.1	Enteritidis
GCA_001973265.1	Enteritidis
GCA_001973275.1	Enteritidis
GCA_001973275.2	Enteritidis
GCA_001973305.1	Enteritidis
GCA_001973325.1	Enteritidis
GCA_001973345.1	Enteritidis
GCA_001973355.1	Enteritidis
GCA_001973385.1	Enteritidis
GCA_001973405.1	Enteritidis
GCA_001973425.1	Enteritidis
GCA_001973435.1	Enteritidis
GCA_001973465.1	Enteritidis
GCA_001973475.1	Enteritidis
GCA_001973505.1	Enteritidis
GCA_001973515.1	Enteritidis
GCA_001973545.1	Enteritidis
GCA_001973565.1	Enteritidis
GCA_001973585.1	Enteritidis
GCA_001973595.1	Enteritidis
GCA_001973625.1	Enteritidis
GCA_001973645.1	Enteritidis
GCA_001973665.1	Enteritidis
GCA_001973675.1	Enteritidis
GCA_001973705.1	Enteritidis
GCA_001973725.1	Enteritidis
GCA_001973745.1	Enteritidis
GCA_001973755.1	Enteritidis
GCA_001973785.1	Enteritidis
GCA_001973785.2	Enteritidis
GCA_001973805.1	Enteritidis
GCA_001997445.1	Enteritidis
GCA_002037825.1	Enteritidis
GCA_002037835.1	Enteritidis
GCA_002037865.1	Enteritidis
GCA_002037885.1	Enteritidis
GCA_002037895.1	Enteritidis
GCA_002037905.1	Enteritidis
GCA_002037945.1	Enteritidis
GCA_002037965.1	Enteritidis
GCA_002037985.1	Enteritidis
GCA_002037995.1	Enteritidis
GCA_002038025.1	Enteritidis
GCA_002038035.1	Enteritidis
GCA_002038055.1	Enteritidis
GCA_002038065.1	Enteritidis
GCA_002038105.1	Enteritidis
GCA_002038115.1	Enteritidis
GCA_002038135.1	Enteritidis
GCA_002038155.1	Enteritidis
GCA_002038185.1	Enteritidis
GCA_002038205.1	Enteritidis
GCA_002038215.1	Enteritidis
GCA_002038225.1	Enteritidis
GCA_002038255.1	Enteritidis
GCA_002038285.1	Enteritidis
GCA_002038305.1	Enteritidis
GCA_002038325.1	Enteritidis
GCA_002038345.1	Enteritidis
GCA_002038365.1	Enteritidis
GCA_002038385.1	Enteritidis
GCA_002038395.1	Enteritidis
GCA_002038425.1	Enteritidis
GCA_002038445.1	Enteritidis
GCA_002038455.1	Enteritidis
GCA_002038485.1	Enteritidis
GCA_002038505.1	Enteritidis
GCA_002038525.1	Enteritidis
GCA_002038545.1	Enteritidis
GCA_002038555.1	Enteritidis
GCA_002038585.1	Enteritidis
GCA_002038605.1	Enteritidis
GCA_002038625.1	Enteritidis
GCA_002038645.1	Enteritidis
GCA_002038665.1	Enteritidis
GCA_002038685.1	Enteritidis
GCA_002038705.1	Enteritidis
GCA_002038715.1	Enteritidis
GCA_002038745.1	Enteritidis
GCA_002038765.1	Enteritidis
GCA_002038785.1	Enteritidis
GCA_002038805.1	Enteritidis
GCA_002038825.1	Enteritidis
GCA_002038835.1	Enteritidis
GCA_002038865.1	Enteritidis
GCA_002038885.1	Enteritidis
GCA_002038905.1	Enteritidis
GCA_002038915.1	Enteritidis
GCA_002038945.1	Enteritidis
GCA_002038965.1	Enteritidis
GCA_002038975.1	Enteritidis
GCA_002039005.1	Enteritidis
GCA_002039025.1	Enteritidis
GCA_002039045.1	Enteritidis
GCA_002039065.1	Enteritidis
GCA_002039085.1	Enteritidis
GCA_002039105.1	Enteritidis
GCA_002039125.1	Enteritidis
GCA_002039145.1	Enteritidis
GCA_002039165.1	Enteritidis
GCA_002039185.1	Enteritidis
GCA_002039205.1	Enteritidis
GCA_002039215.1	Enteritidis
GCA_002039245.1	Enteritidis
GCA_002039265.1	Enteritidis
GCA_002039285.1	Enteritidis
GCA_002039295.1	Enteritidis
GCA_002039325.1	Enteritidis
GCA_002039335.1	Enteritidis
GCA_002039365.1	Enteritidis
GCA_002039385.1	Enteritidis
GCA_002039395.1	Enteritidis
GCA_002039425.1	Enteritidis
GCA_002039445.1	Enteritidis
GCA_002039455.1	Enteritidis
GCA_002039485.1	Enteritidis
GCA_002039505.1	Enteritidis
GCA_002039525.1	Enteritidis
GCA_002039545.1	Enteritidis
GCA_002039565.1	Enteritidis
GCA_002039585.1	Enteritidis
GCA_002039595.1	Enteritidis
GCA_002039625.1	Enteritidis
GCA_002039645.1	Enteritidis
GCA_002039665.1	Enteritidis
GCA_002039685.1	Enteritidis
GCA_002039705.1	Enteritidis
GCA_002039715.1	Enteritidis
GCA_002039745.1	Enteritidis
GCA_002039755.1	Enteritidis
GCA_002039785.1	Enteritidis
GCA_002039805.1	Enteritidis
GCA_002039815.1	Enteritidis
GCA_002039845.1	Enteritidis
GCA_002039855.1	Enteritidis
GCA_002039865.1	Enteritidis
GCA_002039905.1	Enteritidis
GCA_002039915.1	Enteritidis
GCA_002039925.1	Enteritidis
GCA_002039965.1	Enteritidis
GCA_002039985.1	Enteritidis
GCA_002040005.1	Enteritidis
GCA_002040015.1	Enteritidis
GCA_002040045.1	Enteritidis
GCA_002040065.1	Enteritidis
GCA_002040085.1	Enteritidis
GCA_002040095.1	Enteritidis
GCA_002040125.1	Enteritidis
GCA_002040135.1	Enteritidis
GCA_002040145.1	Enteritidis
GCA_002040155.1	Enteritidis
GCA_002040205.1	Enteritidis
GCA_002040215.1	Enteritidis
GCA_002040245.1	Enteritidis
GCA_002040255.1	Enteritidis
GCA_002040285.1	Enteritidis
GCA_002040305.1	Enteritidis
GCA_002040315.1	Enteritidis
GCA_002040325.1	Enteritidis
GCA_002040365.1	Enteritidis
GCA_002040385.1	Enteritidis
GCA_002040395.1	Enteritidis
GCA_002040405.1	Enteritidis
GCA_002040445.1	Enteritidis
GCA_002040465.1	Enteritidis
GCA_002040485.1	Enteritidis
GCA_002040495.1	Enteritidis
GCA_002040525.1	Enteritidis
GCA_002040545.1	Enteritidis
GCA_002040565.1	Enteritidis
GCA_002040585.1	Enteritidis
GCA_002040595.1	Enteritidis
GCA_002040605.1	Enteritidis
GCA_002040615.1	Enteritidis
GCA_002040665.1	Enteritidis
GCA_002040675.1	Enteritidis
GCA_002040705.1	Enteritidis
GCA_002040735.1	Enteritidis
GCA_002040765.1	Enteritidis
GCA_002040785.1	Enteritidis
GCA_002040805.1	Enteritidis
GCA_002040825.1	Enteritidis
GCA_002040835.1	Enteritidis
GCA_002040845.1	Enteritidis
GCA_002040885.1	Enteritidis
GCA_002040905.1	Enteritidis
GCA_002040915.1	Enteritidis
GCA_002040925.1	Enteritidis
GCA_002040965.1	Enteritidis
GCA_002040975.1	Enteritidis
GCA_002040985.1	Enteritidis
GCA_002041025.1	Enteritidis
GCA_002041035.1	Enteritidis
GCA_002041065.1	Enteritidis
GCA_002041085.1	Enteritidis
GCA_002041095.1	Enteritidis
GCA_002041125.1	Enteritidis
GCA_002041145.1	Enteritidis
GCA_002041165.1	Enteritidis
GCA_002041175.1	Enteritidis
GCA_002041205.1	Enteritidis
GCA_002041215.1	Enteritidis
GCA_002041245.1	Enteritidis
GCA_002041265.1	Enteritidis
GCA_002041275.1	Enteritidis
GCA_002041305.1	Enteritidis
GCA_002041325.1	Enteritidis
GCA_002041345.1	Enteritidis
GCA_002041365.1	Enteritidis
GCA_002041375.1	Enteritidis
GCA_002041385.1	Enteritidis
GCA_002041425.1	Enteritidis
GCA_002041445.1	Enteritidis
GCA_002041455.1	Enteritidis
GCA_002041465.1	Enteritidis
GCA_002041505.1	Enteritidis
GCA_002041525.1	Enteritidis
GCA_002041535.1	Enteritidis
GCA_002041545.1	Enteritidis
GCA_002041575.1	Enteritidis
GCA_002041605.1	Enteritidis
GCA_002041615.1	Enteritidis
GCA_002041625.1	Enteritidis
GCA_002041665.1	Enteritidis
GCA_002041685.1	Enteritidis
GCA_002041695.1	Enteritidis
GCA_002041705.1	Enteritidis
GCA_002041745.1	Enteritidis
GCA_002041755.1	Enteritidis
GCA_002041765.1	Enteritidis
GCA_002041775.1	Enteritidis
GCA_002041825.1	Enteritidis
GCA_002041835.1	Enteritidis
GCA_002041845.1	Enteritidis
GCA_002041885.1	Enteritidis
GCA_002041905.1	Enteritidis
GCA_002041925.1	Enteritidis
GCA_002041935.1	Enteritidis
GCA_002041945.1	Enteritidis
GCA_002041955.1	Enteritidis
GCA_002042005.1	Enteritidis
GCA_002042015.1	Enteritidis
GCA_002042025.1	Enteritidis
GCA_002042065.1	Enteritidis
GCA_002042075.1	Enteritidis
GCA_002042105.1	Enteritidis
GCA_002042115.1	Enteritidis
GCA_002042145.1	Enteritidis
GCA_002042165.1	Enteritidis
GCA_002042175.1	Enteritidis
GCA_002042185.1	Enteritidis
GCA_002042225.1	Enteritidis
GCA_002042235.1	Enteritidis
GCA_002042245.1	Enteritidis
GCA_002042255.1	Enteritidis
GCA_002042305.1	Enteritidis
GCA_002042315.1	Enteritidis
GCA_002042325.1	Enteritidis
GCA_002042365.1	Enteritidis
GCA_002042375.1	Enteritidis
GCA_002042395.1	Enteritidis
GCA_002042405.1	Enteritidis
GCA_002042445.1	Enteritidis
GCA_002042455.1	Enteritidis
GCA_002042485.1	Enteritidis
GCA_002042495.1	Enteritidis
GCA_002042525.1	Enteritidis
GCA_002042535.1	Enteritidis
GCA_002042565.1	Enteritidis
GCA_002042585.1	Enteritidis
GCA_002042595.1	Enteritidis
GCA_002042625.1	Enteritidis
GCA_002042635.1	Enteritidis
GCA_002042665.1	Enteritidis
GCA_002042675.1	Enteritidis
GCA_002042685.1	Enteritidis
GCA_002042725.1	Enteritidis
GCA_002042745.1	Enteritidis
GCA_002042755.1	Enteritidis
GCA_002042785.1	Enteritidis
GCA_002042795.1	Enteritidis
GCA_002042825.1	Enteritidis
GCA_002042845.1	Enteritidis
GCA_002042855.1	Enteritidis
GCA_002077315.1	Enteritidis
GCA_002107235.1	Enteritidis
GCA_002107355.1	Enteritidis
GCA_002128365.1	Enteritidis
GCA_002128385.1	Enteritidis
GCA_002220345.1	Enteritidis
GCA_002242515.1	Enteritidis
GCA_002242555.1	Enteritidis
GCA_002242565.1	Enteritidis
GCA_002242595.1	Enteritidis
GCA_002283095.1	Enteritidis
GCA_002284635.1	Enteritidis
GCA_002317515.1	Enteritidis
GCA_002528945.1	Enteritidis
GCA_002528955.1	Enteritidis
GCA_002529025.1	Enteritidis
GCA_002760915.1	Enteritidis
GCA_002760935.1	Enteritidis
GCA_002760955.1	Enteritidis
GCA_002760975.1	Enteritidis
GCA_002760995.1	Enteritidis
GCA_002761015.1	Enteritidis
GCA_002761035.1	Enteritidis
GCA_002761055.1	Enteritidis
GCA_002761075.1	Enteritidis
GCA_002761095.1	Enteritidis
GCA_002761115.1	Enteritidis
GCA_002761135.1	Enteritidis
GCA_002761155.1	Enteritidis
GCA_002763415.1	Enteritidis
GCA_002795745.1	Enteritidis
GCA_002803705.1	Enteritidis
GCA_002810205.1	Enteritidis
GCA_002813975.1	Enteritidis
GCA_002813995.1	Enteritidis
GCA_002906965.1	Enteritidis
GCA_002906985.1	Enteritidis
GCA_002907005.1	Enteritidis
GCA_002908955.1	Enteritidis
GCA_002908975.1	Enteritidis
GCA_002908995.1	Enteritidis
GCA_002909015.1	Enteritidis
GCA_002909165.1	Enteritidis
GCA_002914435.1	Enteritidis
GCA_002914455.1	Enteritidis
GCA_002914485.1	Enteritidis
GCA_002982095.1	Enteritidis
GCA_003031995.1	Enteritidis
GCA_003032035.1	Enteritidis
GCA_003067565.1	Enteritidis
GCA_003067575.1	Enteritidis
GCA_003067605.1	Enteritidis
GCA_003067625.1	Enteritidis
GCA_003067645.1	Enteritidis
GCA_003067665.1	Enteritidis
GCA_003067685.1	Enteritidis
GCA_003184325.1	Enteritidis
GCA_003184425.1	Enteritidis
GCA_003186065.1	Enteritidis
GCA_003357105.1	Enteritidis
GCA_003357125.1	Enteritidis
GCA_003418815.1	Enteritidis
GCA_003418895.1	Enteritidis
GCA_003429365.1	Enteritidis
GCA_003430885.1	Enteritidis
GCA_003430895.1	Enteritidis
GCA_003430925.1	Enteritidis
GCA_003430935.1	Enteritidis
GCA_003430965.1	Enteritidis
GCA_003430975.1	Enteritidis
GCA_003431005.1	Enteritidis
GCA_003431025.1	Enteritidis
GCA_003431045.1	Enteritidis
GCA_003431055.1	Enteritidis
GCA_003431065.1	Enteritidis
GCA_003431095.1	Enteritidis
GCA_003431115.1	Enteritidis
GCA_003431145.1	Enteritidis
GCA_003431165.1	Enteritidis
GCA_003431175.1	Enteritidis
GCA_003431195.1	Enteritidis
GCA_003431225.1	Enteritidis
GCA_003663765.1	Enteritidis
GCA_003710165.1	Enteritidis
GCA_003733685.1	Enteritidis
GCA_003733865.1	Enteritidis
GCA_003735105.1	Enteritidis
GCA_003745365.1	Enteritidis
GCA_003749865.1	Enteritidis
GCA_003753705.1	Enteritidis
GCA_003753885.1	Enteritidis
GCA_003767585.1	Enteritidis
GCA_003779685.1	Enteritidis
GCA_003868955.1	Enteritidis
GCA_003868995.1	Enteritidis
GCA_003869395.1	Enteritidis
GCA_003870695.1	Enteritidis
GCA_003870955.1	Enteritidis
GCA_003871175.1	Enteritidis
GCA_003871375.1	Enteritidis
GCA_003871535.1	Enteritidis
GCA_003871735.1	Enteritidis
GCA_003871795.1	Enteritidis
GCA_003872275.1	Enteritidis
GCA_003872855.1	Enteritidis
GCA_003872995.1	Enteritidis
GCA_003873015.1	Enteritidis
GCA_003873135.1	Enteritidis
GCA_003873175.1	Enteritidis
GCA_003873435.1	Enteritidis
GCA_003874115.1	Enteritidis
GCA_003874255.1	Enteritidis
GCA_003874355.1	Enteritidis
GCA_003874395.1	Enteritidis
GCA_003874415.1	Enteritidis
GCA_003875255.1	Enteritidis
GCA_003875435.1	Enteritidis
GCA_003875495.1	Enteritidis
GCA_003875525.1	Enteritidis
GCA_003875555.1	Enteritidis
GCA_003875715.1	Enteritidis
GCA_003875735.1	Enteritidis
GCA_003875935.1	Enteritidis
GCA_003876175.1	Enteritidis
GCA_003876575.1	Enteritidis
GCA_003876695.1	Enteritidis
GCA_003876735.1	Enteritidis
GCA_003876745.1	Enteritidis
GCA_003876755.1	Enteritidis
GCA_003878275.1	Enteritidis
GCA_003878475.1	Enteritidis
GCA_003879375.1	Enteritidis
GCA_003880355.1	Enteritidis
GCA_003880695.1	Enteritidis
GCA_003880775.1	Enteritidis
GCA_003881155.1	Enteritidis
GCA_003881455.1	Enteritidis
GCA_003882135.1	Enteritidis
GCA_003882415.1	Enteritidis
GCA_003882475.1	Enteritidis
GCA_003883255.1	Enteritidis
GCA_003883375.1	Enteritidis
GCA_003883995.1	Enteritidis
GCA_003884095.1	Enteritidis
GCA_003884555.1	Enteritidis
GCA_003884885.1	Enteritidis
GCA_003885495.1	Enteritidis
GCA_003886855.1	Enteritidis
GCA_003886875.1	Enteritidis
GCA_003887175.1	Enteritidis
GCA_003887195.1	Enteritidis
GCA_003887895.1	Enteritidis
GCA_003887955.1	Enteritidis
GCA_003887975.1	Enteritidis
GCA_003888115.1	Enteritidis
GCA_003888135.1	Enteritidis
GCA_003888215.1	Enteritidis
GCA_003888235.1	Enteritidis
GCA_003888395.1	Enteritidis
GCA_003888575.1	Enteritidis
GCA_003888745.1	Enteritidis
GCA_003889175.1	Enteritidis
GCA_003889275.1	Enteritidis
GCA_003889495.1	Enteritidis
GCA_003889635.1	Enteritidis
GCA_003890235.1	Enteritidis
GCA_003890375.1	Enteritidis
GCA_003890435.1	Enteritidis
GCA_003890795.1	Enteritidis
GCA_003891155.1	Enteritidis
GCA_003891995.1	Enteritidis
GCA_003892035.1	Enteritidis
GCA_003892095.1	Enteritidis
GCA_003892735.1	Enteritidis
GCA_003892775.1	Enteritidis
GCA_003893015.1	Enteritidis
GCA_003893035.1	Enteritidis
GCA_003893235.1	Enteritidis
GCA_003893255.1	Enteritidis
GCA_003893375.1	Enteritidis
GCA_003893395.1	Enteritidis
GCA_003893435.1	Enteritidis
GCA_003893515.1	Enteritidis
GCA_003893595.1	Enteritidis
GCA_003893635.1	Enteritidis
GCA_003893675.1	Enteritidis
GCA_003893875.1	Enteritidis
GCA_003894155.1	Enteritidis
GCA_003894235.1	Enteritidis
GCA_003894415.1	Enteritidis
GCA_003894435.1	Enteritidis
GCA_003894715.1	Enteritidis
GCA_003895075.1	Enteritidis
GCA_003895695.1	Enteritidis
GCA_003895975.1	Enteritidis
GCA_003896055.1	Enteritidis
GCA_003896095.1	Enteritidis
GCA_003896435.1	Enteritidis
GCA_003896765.1	Enteritidis
GCA_003896815.1	Enteritidis
GCA_003896895.1	Enteritidis
GCA_003896935.1	Enteritidis
GCA_003897065.1	Enteritidis
GCA_003897535.1	Enteritidis
GCA_003897575.1	Enteritidis
GCA_003897735.1	Enteritidis
GCA_003898075.1	Enteritidis
GCA_003898355.1	Enteritidis
GCA_003899075.1	Enteritidis
GCA_003899575.1	Enteritidis
GCA_003899595.1	Enteritidis
GCA_003899795.1	Enteritidis
GCA_003899865.1	Enteritidis
GCA_003900135.1	Enteritidis
GCA_003900415.1	Enteritidis
GCA_003900475.1	Enteritidis
GCA_003900495.1	Enteritidis
GCA_003900575.1	Enteritidis
GCA_003900635.1	Enteritidis
GCA_003901305.1	Enteritidis
GCA_003901895.1	Enteritidis
GCA_003902015.1	Enteritidis
GCA_003902035.1	Enteritidis
GCA_003902575.1	Enteritidis
GCA_003902655.1	Enteritidis
GCA_003902915.1	Enteritidis
GCA_003903135.1	Enteritidis
GCA_003903725.1	Enteritidis
GCA_003903855.1	Enteritidis
GCA_003904015.1	Enteritidis
GCA_003904195.1	Enteritidis
GCA_003904535.1	Enteritidis
GCA_003904555.1	Enteritidis
GCA_003904875.1	Enteritidis
GCA_003905015.1	Enteritidis
GCA_003905065.1	Enteritidis
GCA_003905095.1	Enteritidis
GCA_003905635.1	Enteritidis
GCA_003905805.1	Enteritidis
GCA_003905835.1	Enteritidis
GCA_003905855.1	Enteritidis
GCA_003905865.1	Enteritidis
GCA_003906095.1	Enteritidis
GCA_003906235.1	Enteritidis
GCA_003906315.1	Enteritidis
GCA_003906455.1	Enteritidis
GCA_003906575.1	Enteritidis
GCA_003906655.1	Enteritidis
GCA_003906695.1	Enteritidis
GCA_003906715.1	Enteritidis
GCA_003906915.1	Enteritidis
GCA_003907075.1	Enteritidis
GCA_003907555.1	Enteritidis
GCA_003907655.1	Enteritidis
GCA_003907805.1	Enteritidis
GCA_003907895.1	Enteritidis
GCA_003908115.1	Enteritidis
GCA_003908625.1	Enteritidis
GCA_003908755.1	Enteritidis
GCA_003908935.1	Enteritidis
GCA_003909195.1	Enteritidis
GCA_003909285.1	Enteritidis
GCA_003909455.1	Enteritidis
GCA_003909875.1	Enteritidis
GCA_003909895.1	Enteritidis
GCA_003909985.1	Enteritidis
GCA_003910455.1	Enteritidis
GCA_003910595.1	Enteritidis
GCA_003910635.1	Enteritidis
GCA_003910715.1	Enteritidis
GCA_003911275.1	Enteritidis
GCA_003911595.1	Enteritidis
GCA_003911915.1	Enteritidis
GCA_003912735.1	Enteritidis
GCA_003913115.1	Enteritidis
GCA_003913175.1	Enteritidis
GCA_003913335.1	Enteritidis
GCA_003913455.1	Enteritidis
GCA_003913475.1	Enteritidis
GCA_003914275.1	Enteritidis
GCA_003914615.1	Enteritidis
GCA_003914675.1	Enteritidis
GCA_003915375.1	Enteritidis
GCA_003915455.1	Enteritidis
GCA_003915675.1	Enteritidis
GCA_003915695.1	Enteritidis
GCA_003915895.1	Enteritidis
GCA_003916075.1	Enteritidis
GCA_003916895.1	Enteritidis
GCA_003918065.1	Enteritidis
GCA_003918175.1	Enteritidis
GCA_003918595.1	Enteritidis
GCA_003918635.1	Enteritidis
GCA_003918995.1	Enteritidis
GCA_003919855.1	Enteritidis
GCA_003920575.1	Enteritidis
GCA_003921695.1	Enteritidis
GCA_003921855.1	Enteritidis
GCA_003922535.1	Enteritidis
GCA_003922655.1	Enteritidis
GCA_003922675.1	Enteritidis
GCA_003922835.1	Enteritidis
GCA_003922935.1	Enteritidis
GCA_003922955.1	Enteritidis
GCA_003923055.1	Enteritidis
GCA_003923195.1	Enteritidis
GCA_003923255.1	Enteritidis
GCA_003923315.1	Enteritidis
GCA_003923395.1	Enteritidis
GCA_003923405.1	Enteritidis
GCA_003923575.1	Enteritidis
GCA_003923875.1	Enteritidis
GCA_003923915.1	Enteritidis
GCA_003924715.1	Enteritidis
GCA_004157715.1	Enteritidis
GCA_004157895.1	Enteritidis
GCA_004158015.1	Enteritidis
GCA_004158425.1	Enteritidis
GCA_004159015.1	Enteritidis
GCA_004159295.1	Enteritidis
GCA_004159435.1	Enteritidis
GCA_004159635.1	Enteritidis
GCA_004160075.1	Enteritidis
GCA_004160165.1	Enteritidis
GCA_004160795.1	Enteritidis
GCA_004161075.1	Enteritidis
GCA_004161175.1	Enteritidis
GCA_004161615.1	Enteritidis
GCA_004161975.1	Enteritidis
GCA_004162435.1	Enteritidis
GCA_004162555.1	Enteritidis
GCA_004162955.1	Enteritidis
GCA_004163495.1	Enteritidis
GCA_004164055.1	Enteritidis
GCA_004165465.1	Enteritidis
GCA_004165815.1	Enteritidis
GCA_004165955.1	Enteritidis
GCA_004165995.1	Enteritidis
GCA_004166235.1	Enteritidis
GCA_004174015.1	Enteritidis
GCA_004174275.1	Enteritidis
GCA_004174675.1	Enteritidis
GCA_004174855.1	Enteritidis
GCA_004174915.1	Enteritidis
GCA_004174925.1	Enteritidis
GCA_004175935.1	Enteritidis
GCA_004176055.1	Enteritidis
GCA_004176315.1	Enteritidis
GCA_004176355.1	Enteritidis
GCA_004176525.1	Enteritidis
GCA_004177355.1	Enteritidis
GCA_004177625.1	Enteritidis
GCA_004177835.1	Enteritidis
GCA_004177845.1	Enteritidis
GCA_004177965.1	Enteritidis
GCA_004178055.1	Enteritidis
GCA_004178155.1	Enteritidis
GCA_004178265.1	Enteritidis
GCA_004178275.1	Enteritidis
GCA_004178485.1	Enteritidis
GCA_004178585.1	Enteritidis
GCA_004178775.1	Enteritidis
GCA_004178935.1	Enteritidis
GCA_004179615.1	Enteritidis
GCA_004179625.1	Enteritidis
GCA_004179835.1	Enteritidis
GCA_004179895.1	Enteritidis
GCA_004179905.1	Enteritidis
GCA_004180025.1	Enteritidis
GCA_004180255.1	Enteritidis
GCA_004180395.1	Enteritidis
GCA_004180435.1	Enteritidis
GCA_004180475.1	Enteritidis
GCA_004180495.1	Enteritidis
GCA_004180765.1	Enteritidis
GCA_004181005.1	Enteritidis
GCA_004181395.1	Enteritidis
GCA_004181405.1	Enteritidis
GCA_004181675.1	Enteritidis
GCA_004182175.1	Enteritidis
GCA_004182195.1	Enteritidis
GCA_004182565.1	Enteritidis
GCA_004183415.1	Enteritidis
GCA_004183585.1	Enteritidis
GCA_004183655.1	Enteritidis
GCA_004183795.1	Enteritidis
GCA_004183805.1	Enteritidis
GCA_004184085.1	Enteritidis
GCA_004184155.1	Enteritidis
GCA_004184195.1	Enteritidis
GCA_004184295.1	Enteritidis
GCA_004184625.1	Enteritidis
GCA_004185115.1	Enteritidis
GCA_004185785.1	Enteritidis
GCA_004185795.1	Enteritidis
GCA_004185995.1	Enteritidis
GCA_004187015.1	Enteritidis
GCA_004187195.1	Enteritidis
GCA_004187555.1	Enteritidis
GCA_004187595.1	Enteritidis
GCA_004187675.1	Enteritidis
GCA_004187775.1	Enteritidis
GCA_004187795.1	Enteritidis
GCA_004187815.1	Enteritidis
GCA_004187935.1	Enteritidis
GCA_004188235.1	Enteritidis
GCA_004188335.1	Enteritidis
GCA_004188655.1	Enteritidis
GCA_004188955.1	Enteritidis
GCA_004189025.1	Enteritidis
GCA_004189075.1	Enteritidis
GCA_004189295.1	Enteritidis
GCA_004189435.1	Enteritidis
GCA_004190075.1	Enteritidis
GCA_004190115.1	Enteritidis
GCA_004190175.1	Enteritidis
GCA_004190315.1	Enteritidis
GCA_004190395.1	Enteritidis
GCA_004190675.1	Enteritidis
GCA_004190815.1	Enteritidis
GCA_004190845.1	Enteritidis
GCA_004191105.1	Enteritidis
GCA_004191135.1	Enteritidis
GCA_004191375.1	Enteritidis
GCA_004191455.1	Enteritidis
GCA_004191525.1	Enteritidis
GCA_004191555.1	Enteritidis
GCA_004192115.1	Enteritidis
GCA_004192135.1	Enteritidis
GCA_004192335.1	Enteritidis
GCA_004192355.1	Enteritidis
GCA_004192475.1	Enteritidis
GCA_004215425.1	Enteritidis
GCA_004215655.1	Enteritidis
GCA_004215675.1	Enteritidis
GCA_004216235.1	Enteritidis
GCA_004216315.1	Enteritidis
GCA_004216355.1	Enteritidis
GCA_004218355.1	Enteritidis
GCA_004218785.1	Enteritidis
GCA_004219765.1	Enteritidis
GCA_004219905.1	Enteritidis
GCA_004220905.1	Enteritidis
GCA_004222445.1	Enteritidis
GCA_004223805.1	Enteritidis
GCA_004224245.1	Enteritidis
GCA_004224275.1	Enteritidis
GCA_004224785.1	Enteritidis
GCA_004225245.1	Enteritidis
GCA_004226185.1	Enteritidis
GCA_004226465.1	Enteritidis
GCA_004226945.1	Enteritidis
GCA_004227205.1	Enteritidis
GCA_004227425.1	Enteritidis
GCA_004227885.1	Enteritidis
GCA_004228545.1	Enteritidis
GCA_004229485.1	Enteritidis
GCA_004229565.1	Enteritidis
GCA_004230025.1	Enteritidis
GCA_004230085.1	Enteritidis
GCA_004250705.1	Enteritidis
GCA_004250765.1	Enteritidis
GCA_004252435.1	Enteritidis
GCA_004252465.1	Enteritidis
GCA_004252475.1	Enteritidis
GCA_004252565.1	Enteritidis
GCA_004252665.1	Enteritidis
GCA_004252745.1	Enteritidis
GCA_004252865.1	Enteritidis
GCA_004252965.1	Enteritidis
GCA_004253085.1	Enteritidis
GCA_004253105.1	Enteritidis
GCA_004253145.1	Enteritidis
GCA_004253265.1	Enteritidis
GCA_004253325.1	Enteritidis
GCA_004253425.1	Enteritidis
GCA_004253605.1	Enteritidis
GCA_004253645.1	Enteritidis
GCA_004253745.1	Enteritidis
GCA_004253755.1	Enteritidis
GCA_004253765.1	Enteritidis
GCA_004253825.1	Enteritidis
GCA_004253865.1	Enteritidis
GCA_004254065.1	Enteritidis
GCA_004254125.1	Enteritidis
GCA_004254185.1	Enteritidis
GCA_004254345.1	Enteritidis
GCA_004254365.1	Enteritidis
GCA_004254575.1	Enteritidis
GCA_004254685.1	Enteritidis
GCA_004254705.1	Enteritidis
GCA_004254725.1	Enteritidis
GCA_004254745.1	Enteritidis
GCA_004254785.1	Enteritidis
GCA_004254865.1	Enteritidis
GCA_004254965.1	Enteritidis
GCA_004255125.1	Enteritidis
GCA_004255185.1	Enteritidis
GCA_004255225.1	Enteritidis
GCA_004255265.1	Enteritidis
GCA_004255285.1	Enteritidis
GCA_004255685.1	Enteritidis
GCA_004255805.1	Enteritidis
GCA_004255905.1	Enteritidis
GCA_004256035.1	Enteritidis
GCA_004256065.1	Enteritidis
GCA_004256085.1	Enteritidis
GCA_004256145.1	Enteritidis
GCA_004256245.1	Enteritidis
GCA_004256285.1	Enteritidis
GCA_004256385.1	Enteritidis
GCA_004256425.1	Enteritidis
GCA_004256545.1	Enteritidis
GCA_004256785.1	Enteritidis
GCA_004256865.1	Enteritidis
GCA_004256965.1	Enteritidis
GCA_004256985.1	Enteritidis
GCA_004257105.1	Enteritidis
GCA_004257345.1	Enteritidis
GCA_004257465.1	Enteritidis
GCA_004257525.1	Enteritidis
GCA_004257685.1	Enteritidis
GCA_004257765.1	Enteritidis
GCA_004257805.1	Enteritidis
GCA_004257815.1	Enteritidis
GCA_004258005.1	Enteritidis
GCA_004258105.1	Enteritidis
GCA_004258185.1	Enteritidis
GCA_004258265.1	Enteritidis
GCA_004258445.1	Enteritidis
GCA_004258465.1	Enteritidis
GCA_004258525.1	Enteritidis
GCA_004258545.1	Enteritidis
GCA_004258605.1	Enteritidis
GCA_004258685.1	Enteritidis
GCA_004258835.1	Enteritidis
GCA_004258945.1	Enteritidis
GCA_004258965.1	Enteritidis
GCA_004258995.1	Enteritidis
GCA_004259245.1	Enteritidis
GCA_004259405.1	Enteritidis
GCA_004259535.1	Enteritidis
GCA_004259585.1	Enteritidis
GCA_004259625.1	Enteritidis
GCA_004259965.1	Enteritidis
GCA_004260025.1	Enteritidis
GCA_004260085.1	Enteritidis
GCA_004260135.1	Enteritidis
GCA_004260205.1	Enteritidis
GCA_004260225.1	Enteritidis
GCA_004260305.1	Enteritidis
GCA_004260525.1	Enteritidis
GCA_004260625.1	Enteritidis
GCA_004260865.1	Enteritidis
GCA_004260905.1	Enteritidis
GCA_004261025.1	Enteritidis
GCA_004261105.1	Enteritidis
GCA_004261225.1	Enteritidis
GCA_004261465.1	Enteritidis
GCA_004261585.1	Enteritidis
GCA_004261885.1	Enteritidis
GCA_004261905.1	Enteritidis
GCA_004261925.1	Enteritidis
GCA_004261945.1	Enteritidis
GCA_004262025.1	Enteritidis
GCA_004262285.1	Enteritidis
GCA_004262325.1	Enteritidis
GCA_004262355.1	Enteritidis
GCA_004262515.1	Enteritidis
GCA_004262715.1	Enteritidis
GCA_004262815.1	Enteritidis
GCA_004262995.1	Enteritidis
GCA_004263085.1	Enteritidis
GCA_004263125.1	Enteritidis
GCA_004263145.1	Enteritidis
GCA_004263185.1	Enteritidis
GCA_004263245.1	Enteritidis
GCA_004263265.1	Enteritidis
GCA_004263445.1	Enteritidis
GCA_004263725.1	Enteritidis
GCA_004263825.1	Enteritidis
GCA_004263885.1	Enteritidis
GCA_004264065.1	Enteritidis
GCA_004264145.1	Enteritidis
GCA_004264485.1	Enteritidis
GCA_004264545.1	Enteritidis
GCA_004264585.1	Enteritidis
GCA_004264625.1	Enteritidis
GCA_004264645.1	Enteritidis
GCA_004264965.1	Enteritidis
GCA_004265035.1	Enteritidis
GCA_004265085.1	Enteritidis
GCA_004265145.1	Enteritidis
GCA_004265305.1	Enteritidis
GCA_004265365.1	Enteritidis
GCA_004265515.1	Enteritidis
GCA_004265685.1	Enteritidis
GCA_004265735.1	Enteritidis
GCA_004265765.1	Enteritidis
GCA_004266035.1	Enteritidis
GCA_004266065.1	Enteritidis
GCA_004266565.1	Enteritidis
GCA_004266605.1	Enteritidis
GCA_004266785.1	Enteritidis
GCA_004266795.1	Enteritidis
GCA_004266845.1	Enteritidis
GCA_004266885.1	Enteritidis
GCA_004267125.1	Enteritidis
GCA_004267135.1	Enteritidis
GCA_004267205.1	Enteritidis
GCA_004267225.1	Enteritidis
GCA_004267235.1	Enteritidis
GCA_004267265.1	Enteritidis
GCA_004267285.1	Enteritidis
GCA_004267325.1	Enteritidis
GCA_004267625.1	Enteritidis
GCA_004267745.1	Enteritidis
GCA_004268005.1	Enteritidis
GCA_004268015.1	Enteritidis
GCA_004268405.1	Enteritidis
GCA_004268455.1	Enteritidis
GCA_004268545.1	Enteritidis
GCA_004268725.1	Enteritidis
GCA_004268905.1	Enteritidis
GCA_004268945.1	Enteritidis
GCA_004269055.1	Enteritidis
GCA_004269185.1	Enteritidis
GCA_004269245.1	Enteritidis
GCA_004269325.1	Enteritidis
GCA_004269415.1	Enteritidis
GCA_004269425.1	Enteritidis
GCA_004269505.1	Enteritidis
GCA_004269865.1	Enteritidis
GCA_004270135.1	Enteritidis
GCA_004270205.1	Enteritidis
GCA_004270225.1	Enteritidis
GCA_004270265.1	Enteritidis
GCA_004270325.1	Enteritidis
GCA_004270465.1	Enteritidis
GCA_004270525.1	Enteritidis
GCA_004270645.1	Enteritidis
GCA_004270675.1	Enteritidis
GCA_004270885.1	Enteritidis
GCA_004271285.1	Enteritidis
GCA_004271295.1	Enteritidis
GCA_004271365.1	Enteritidis
GCA_004271405.1	Enteritidis
GCA_004271465.1	Enteritidis
GCA_004271565.1	Enteritidis
GCA_004271825.1	Enteritidis
GCA_004271905.1	Enteritidis
GCA_004271965.1	Enteritidis
GCA_004272145.1	Enteritidis
GCA_004272265.1	Enteritidis
GCA_004272285.1	Enteritidis
GCA_004272425.1	Enteritidis
GCA_004272545.1	Enteritidis
GCA_004272575.1	Enteritidis
GCA_004272935.1	Enteritidis
GCA_004273125.1	Enteritidis
GCA_004273265.1	Enteritidis
GCA_004273275.1	Enteritidis
GCA_004273425.1	Enteritidis
GCA_004273665.1	Enteritidis
GCA_004273805.1	Enteritidis
GCA_004273865.1	Enteritidis
GCA_004273965.1	Enteritidis
GCA_004274085.1	Enteritidis
GCA_004274115.1	Enteritidis
GCA_004274225.1	Enteritidis
GCA_004274405.1	Enteritidis
GCA_004274425.1	Enteritidis
GCA_004274645.1	Enteritidis
GCA_004274725.1	Enteritidis
GCA_004274825.1	Enteritidis
GCA_004274995.1	Enteritidis
GCA_004275015.1	Enteritidis
GCA_004275075.1	Enteritidis
GCA_004275305.1	Enteritidis
GCA_004275375.1	Enteritidis
GCA_004275415.1	Enteritidis
GCA_004275535.1	Enteritidis
GCA_004275555.1	Enteritidis
GCA_004275575.1	Enteritidis
GCA_004275775.1	Enteritidis
GCA_004275795.1	Enteritidis
GCA_004275915.1	Enteritidis
GCA_004275955.1	Enteritidis
GCA_004275985.1	Enteritidis
GCA_004276055.1	Enteritidis
GCA_004276255.1	Enteritidis
GCA_004276995.1	Enteritidis
GCA_004278485.1	Enteritidis
GCA_004279175.1	Enteritidis
GCA_004279655.1	Enteritidis
GCA_004280235.1	Enteritidis
GCA_004280335.1	Enteritidis
GCA_004280695.1	Enteritidis
GCA_004280975.1	Enteritidis
GCA_004281075.1	Enteritidis
GCA_004281095.1	Enteritidis
GCA_004281535.1	Enteritidis
GCA_004288955.1	Enteritidis
GCA_004289095.1	Enteritidis
GCA_004292255.1	Enteritidis
GCA_004292285.1	Enteritidis
GCA_004292295.1	Enteritidis
GCA_004292315.1	Enteritidis
GCA_004292345.1	Enteritidis
GCA_004294775.1	Enteritidis
GCA_004298865.1	Enteritidis
GCA_004299605.1	Enteritidis
GCA_004309005.1	Enteritidis
GCA_004309205.1	Enteritidis
GCA_004309295.1	Enteritidis
GCA_004309375.1	Enteritidis
GCA_004309525.1	Enteritidis
GCA_004309575.1	Enteritidis
GCA_004309635.1	Enteritidis
GCA_004321645.1	Enteritidis
GCA_004323815.1	Enteritidis
GCA_004323915.1	Enteritidis
GCA_004323925.1	Enteritidis
GCA_004323935.1	Enteritidis
GCA_004323945.1	Enteritidis
GCA_004324225.1	Enteritidis
GCA_004337755.1	Enteritidis
GCA_004345105.1	Enteritidis
GCA_004744765.1	Enteritidis
GCA_004744895.1	Enteritidis
GCA_004745055.1	Enteritidis
GCA_004798215.1	Enteritidis
GCA_005409805.1	Enteritidis
GCA_005415335.1	Enteritidis
GCA_005447255.1	Enteritidis
GCA_005447705.1	Enteritidis
GCA_005447825.1	Enteritidis
GCA_005447865.1	Enteritidis
GCA_005518305.1	Enteritidis
GCA_005518315.1	Enteritidis
GCA_005518345.1	Enteritidis
GCA_005518475.1	Enteritidis
GCA_005518515.1	Enteritidis
GCA_005518575.1	Enteritidis
GCA_005518595.1	Enteritidis
GCA_005518605.1	Enteritidis
GCA_005518665.1	Enteritidis
GCA_005518685.1	Enteritidis
GCA_005518705.1	Enteritidis
GCA_005518765.1	Enteritidis
GCA_005519505.1	Enteritidis
GCA_005519515.1	Enteritidis
GCA_005519605.1	Enteritidis
GCA_005519735.1	Enteritidis
GCA_005519785.1	Enteritidis
GCA_005519815.1	Enteritidis
GCA_005519865.1	Enteritidis
GCA_005519905.1	Enteritidis
GCA_005519915.1	Enteritidis
GCA_005543715.1	Enteritidis
GCA_005545315.1	Enteritidis
GCA_005545345.1	Enteritidis
GCA_005599375.1	Enteritidis
GCA_005616955.1	Enteritidis
GCA_005617455.1	Enteritidis
GCA_005688095.1	Enteritidis
GCA_005688595.1	Enteritidis
GCA_005688655.1	Enteritidis
GCA_005688755.1	Enteritidis
GCA_005688795.1	Enteritidis
GCA_005689015.1	Enteritidis
GCA_005689145.1	Enteritidis
GCA_005690475.1	Enteritidis
GCA_005704255.1	Enteritidis
GCA_005757095.1	Enteritidis
GCA_005766855.2	Enteritidis
GCA_005766935.1	Enteritidis
GCA_005767235.1	Enteritidis
GCA_005767355.1	Enteritidis
GCA_005767755.1	Enteritidis
GCA_005889955.1	Enteritidis
GCA_005889975.1	Enteritidis
GCA_005896485.1	Enteritidis
GCA_005898105.1	Enteritidis
GCA_005948685.1	Enteritidis
GCA_005996665.1	Enteritidis
GCA_005997755.1	Enteritidis
GCA_005997965.1	Enteritidis
GCA_005998205.1	Enteritidis
GCA_005998225.1	Enteritidis
GCA_005998285.1	Enteritidis
GCA_005998305.1	Enteritidis
GCA_005998345.1	Enteritidis
GCA_005998365.1	Enteritidis
GCA_005998385.1	Enteritidis
GCA_005998405.1	Enteritidis
GCA_005998445.1	Enteritidis
GCA_005998485.1	Enteritidis
GCA_005998565.1	Enteritidis
GCA_005999325.1	Enteritidis
GCA_005999385.1	Enteritidis
GCA_005999565.1	Enteritidis
GCA_006001525.1	Enteritidis
GCA_006001645.1	Enteritidis
GCA_006001665.1	Enteritidis
GCA_006001725.1	Enteritidis
GCA_006001745.1	Enteritidis
GCA_006001805.1	Enteritidis
GCA_006001945.1	Enteritidis
GCA_006001965.1	Enteritidis
GCA_006002005.1	Enteritidis
GCA_006002065.1	Enteritidis
GCA_006002085.1	Enteritidis
GCA_006002125.1	Enteritidis
GCA_006002185.1	Enteritidis
GCA_006002245.1	Enteritidis
GCA_006002265.1	Enteritidis
GCA_006002285.1	Enteritidis
GCA_006002325.1	Enteritidis
GCA_006002385.1	Enteritidis
GCA_006002405.1	Enteritidis
GCA_006002425.1	Enteritidis
GCA_006002485.1	Enteritidis
GCA_006002525.1	Enteritidis
GCA_006002545.1	Enteritidis
GCA_006002565.1	Enteritidis
GCA_006002745.1	Enteritidis
GCA_006002765.1	Enteritidis
GCA_006002785.1	Enteritidis
GCA_006002805.1	Enteritidis
GCA_006002885.1	Enteritidis
GCA_006002965.1	Enteritidis
GCA_006003085.1	Enteritidis
GCA_006003105.1	Enteritidis
GCA_006003205.1	Enteritidis
GCA_006032275.1	Enteritidis
GCA_006045235.1	Enteritidis
GCA_006073435.1	Enteritidis
GCA_006073655.1	Enteritidis
GCA_006073695.1	Enteritidis
GCA_006073775.1	Enteritidis
GCA_006074255.1	Enteritidis
GCA_006074615.1	Enteritidis
GCA_006074635.1	Enteritidis
GCA_006075055.1	Enteritidis
GCA_006075115.1	Enteritidis
GCA_006075205.1	Enteritidis
GCA_006075615.1	Enteritidis
GCA_006076355.1	Enteritidis
GCA_006076375.1	Enteritidis
GCA_006076395.1	Enteritidis
GCA_006076415.1	Enteritidis
GCA_006076465.1	Enteritidis
GCA_006076495.1	Enteritidis
GCA_006076515.1	Enteritidis
GCA_006076535.1	Enteritidis
GCA_006076555.1	Enteritidis
GCA_006076575.1	Enteritidis
GCA_006076595.1	Enteritidis
GCA_006076635.1	Enteritidis
GCA_006076695.1	Enteritidis
GCA_006076815.1	Enteritidis
GCA_006076875.1	Enteritidis
GCA_006076895.1	Enteritidis
GCA_006076935.1	Enteritidis
GCA_006077035.1	Enteritidis
GCA_006077135.1	Enteritidis
GCA_006077175.1	Enteritidis
GCA_006077275.1	Enteritidis
GCA_006077315.1	Enteritidis
GCA_006077435.1	Enteritidis
GCA_006079475.1	Enteritidis
GCA_006079495.1	Enteritidis
GCA_006079855.1	Enteritidis
GCA_006082515.1	Enteritidis
GCA_006124095.1	Enteritidis
GCA_006141415.1	Enteritidis
GCA_006141425.1	Enteritidis
GCA_006143015.1	Enteritidis
GCA_006143035.1	Enteritidis
GCA_006143315.1	Enteritidis
GCA_006143325.1	Enteritidis
GCA_006143355.1	Enteritidis
GCA_006143415.1	Enteritidis
GCA_006143685.1	Enteritidis
GCA_006143935.1	Enteritidis
GCA_006144155.1	Enteritidis
GCA_006144215.1	Enteritidis
GCA_006144225.1	Enteritidis
GCA_006144355.1	Enteritidis
GCA_006144455.1	Enteritidis
GCA_006144495.1	Enteritidis
GCA_006144565.1	Enteritidis
GCA_006144635.1	Enteritidis
GCA_006144915.1	Enteritidis
GCA_006144925.1	Enteritidis
GCA_006144995.1	Enteritidis
GCA_006145215.1	Enteritidis
GCA_006145575.1	Enteritidis
GCA_006145595.1	Enteritidis
GCA_006145615.1	Enteritidis
GCA_006145795.1	Enteritidis
GCA_006145915.1	Enteritidis
GCA_006145955.1	Enteritidis
GCA_006146035.1	Enteritidis
GCA_006154845.1	Enteritidis
GCA_006154865.1	Enteritidis
GCA_006164705.1	Enteritidis
GCA_006168165.1	Enteritidis
GCA_006168385.1	Enteritidis
GCA_006172445.1	Enteritidis
GCA_006176225.1	Enteritidis
GCA_006183925.1	Enteritidis
GCA_006239315.1	Enteritidis
GCA_006259925.1	Enteritidis
GCA_006309865.1	Enteritidis
GCA_006337515.1	Enteritidis
GCA_006338605.1	Enteritidis
GCA_006339395.1	Enteritidis
GCA_006339425.1	Enteritidis
GCA_006339445.1	Enteritidis
GCA_006339845.1	Enteritidis
GCA_006340005.1	Enteritidis
GCA_006340525.1	Enteritidis
GCA_006340555.1	Enteritidis
GCA_006341035.1	Enteritidis
GCA_006341135.1	Enteritidis
GCA_006341335.1	Enteritidis
GCA_006341455.1	Enteritidis
GCA_006341525.1	Enteritidis
GCA_006341705.1	Enteritidis
GCA_006341975.1	Enteritidis
GCA_006342035.1	Enteritidis
GCA_006342285.1	Enteritidis
GCA_006343365.1	Enteritidis
GCA_006380375.1	Enteritidis
GCA_006380375.2	Enteritidis
GCA_006381195.1	Enteritidis
GCA_006381195.2	Enteritidis
GCA_006381265.1	Enteritidis
GCA_006381265.2	Enteritidis
GCA_006381565.1	Enteritidis
GCA_006381565.2	Enteritidis
GCA_006387055.1	Enteritidis
GCA_006387155.1	Enteritidis
GCA_006387195.1	Enteritidis
GCA_006387355.1	Enteritidis
GCA_006387435.1	Enteritidis
GCA_006387715.1	Enteritidis
GCA_006387815.1	Enteritidis
GCA_006387855.1	Enteritidis
GCA_006388095.1	Enteritidis
GCA_006388355.1	Enteritidis
GCA_006388375.1	Enteritidis
GCA_006388395.1	Enteritidis
GCA_006388415.1	Enteritidis
GCA_006388435.1	Enteritidis
GCA_006393095.1	Enteritidis
GCA_006393235.1	Enteritidis
GCA_006393395.1	Enteritidis
GCA_006393495.1	Enteritidis
GCA_006393635.1	Enteritidis
GCA_006393695.1	Enteritidis
GCA_006393775.1	Enteritidis
GCA_006393855.1	Enteritidis
GCA_006393875.1	Enteritidis
GCA_006393915.1	Enteritidis
GCA_006393925.1	Enteritidis
GCA_006394095.1	Enteritidis
GCA_006394155.1	Enteritidis
GCA_006394175.1	Enteritidis
GCA_006394355.1	Enteritidis
GCA_006394475.1	Enteritidis
GCA_006394575.1	Enteritidis
GCA_006394675.1	Enteritidis
GCA_006394775.1	Enteritidis
GCA_006394875.1	Enteritidis
GCA_006394995.1	Enteritidis
GCA_006395095.1	Enteritidis
GCA_006395145.1	Enteritidis
GCA_006395195.1	Enteritidis
GCA_006395235.1	Enteritidis
GCA_006395375.1	Enteritidis
GCA_006395655.1	Enteritidis
GCA_006395735.1	Enteritidis
GCA_006395875.1	Enteritidis
GCA_006395935.1	Enteritidis
GCA_006396075.1	Enteritidis
GCA_006396195.1	Enteritidis
GCA_006396335.1	Enteritidis
GCA_006396355.1	Enteritidis
GCA_006396455.1	Enteritidis
GCA_006397035.1	Enteritidis
GCA_006397095.1	Enteritidis
GCA_006397255.1	Enteritidis
GCA_006397315.1	Enteritidis
GCA_006397375.1	Enteritidis
GCA_006397415.1	Enteritidis
GCA_006397455.1	Enteritidis
GCA_006397495.1	Enteritidis
GCA_006397535.1	Enteritidis
GCA_006397595.1	Enteritidis
GCA_006399035.1	Enteritidis
GCA_006399075.1	Enteritidis
GCA_006399095.1	Enteritidis
GCA_006399255.1	Enteritidis
GCA_006399455.1	Enteritidis
GCA_006399495.1	Enteritidis
GCA_006399595.1	Enteritidis
GCA_006399675.1	Enteritidis
GCA_006399695.1	Enteritidis
GCA_006399755.1	Enteritidis
GCA_006399995.1	Enteritidis
GCA_006400075.1	Enteritidis
GCA_006400105.1	Enteritidis
GCA_006400155.1	Enteritidis
GCA_006400195.1	Enteritidis
GCA_006400435.1	Enteritidis
GCA_006400475.1	Enteritidis
GCA_006400615.1	Enteritidis
GCA_006400675.1	Enteritidis
GCA_006400695.1	Enteritidis
GCA_006400755.1	Enteritidis
GCA_006400775.1	Enteritidis
GCA_006400865.1	Enteritidis
GCA_006400895.1	Enteritidis
GCA_006401125.1	Enteritidis
GCA_006401395.1	Enteritidis
GCA_006401435.1	Enteritidis
GCA_006401555.1	Enteritidis
GCA_006401585.1	Enteritidis
GCA_006402715.1	Enteritidis
GCA_006403015.1	Enteritidis
GCA_006403235.1	Enteritidis
GCA_006403275.1	Enteritidis
GCA_006403415.1	Enteritidis
GCA_006403475.1	Enteritidis
GCA_006403655.1	Enteritidis
GCA_006403675.1	Enteritidis
GCA_006403855.1	Enteritidis
GCA_006403875.1	Enteritidis
GCA_006403955.1	Enteritidis
GCA_006403975.1	Enteritidis
GCA_006404175.1	Enteritidis
GCA_006404355.1	Enteritidis
GCA_006404495.1	Enteritidis
GCA_006404515.1	Enteritidis
GCA_006404555.1	Enteritidis
GCA_006404615.1	Enteritidis
GCA_006404775.1	Enteritidis
GCA_006404795.1	Enteritidis
GCA_006405035.1	Enteritidis
GCA_006405055.1	Enteritidis
GCA_006405295.1	Enteritidis
GCA_006405355.1	Enteritidis
GCA_006405455.1	Enteritidis
GCA_006405655.1	Enteritidis
GCA_006405875.1	Enteritidis
GCA_006406005.1	Enteritidis
GCA_006406035.1	Enteritidis
GCA_006406095.1	Enteritidis
GCA_006406355.1	Enteritidis
GCA_006406455.1	Enteritidis
GCA_006406495.1	Enteritidis
GCA_006406615.1	Enteritidis
GCA_006406735.1	Enteritidis
GCA_006406875.1	Enteritidis
GCA_006406975.1	Enteritidis
GCA_006407015.1	Enteritidis
GCA_006407155.1	Enteritidis
GCA_006407195.1	Enteritidis
GCA_006407735.1	Enteritidis
GCA_006415495.1	Enteritidis
GCA_006417615.1	Enteritidis
GCA_006417895.1	Enteritidis
GCA_006417935.1	Enteritidis
GCA_006418015.1	Enteritidis
GCA_006418035.1	Enteritidis
GCA_006418095.1	Enteritidis
GCA_006418185.1	Enteritidis
GCA_006418215.1	Enteritidis
GCA_006418235.1	Enteritidis
GCA_006418275.1	Enteritidis
GCA_006418335.1	Enteritidis
GCA_006418455.1	Enteritidis
GCA_006418495.1	Enteritidis
GCA_006418515.1	Enteritidis
GCA_006418555.1	Enteritidis
GCA_006418635.1	Enteritidis
GCA_006418735.1	Enteritidis
GCA_006418795.1	Enteritidis
GCA_006418815.1	Enteritidis
GCA_006418855.1	Enteritidis
GCA_006418875.1	Enteritidis
GCA_006418895.1	Enteritidis
GCA_006418935.1	Enteritidis
GCA_006418995.1	Enteritidis
GCA_006419135.1	Enteritidis
GCA_006419175.1	Enteritidis
GCA_006419275.1	Enteritidis
GCA_006419325.1	Enteritidis
GCA_006419435.1	Enteritidis
GCA_006419455.1	Enteritidis
GCA_006419495.1	Enteritidis
GCA_006419555.1	Enteritidis
GCA_006419635.1	Enteritidis
GCA_006419695.1	Enteritidis
GCA_006419715.1	Enteritidis
[truncated: 88,806 more rows]

## Sheet: Accession Numbers Table 5
Accession Table 5: Sequence Read Archive accession numbers of outbreak-associated Salmonella enterica subspecies enterica reads used to validate multiepitope vaccine construct epitopes
Sequence Read Archive SRR Accession Number	Salmonella enterica subspecies enterica Serovar1
SRR10000867	Typhimurium
SRR10000878	Oranienburg
SRR10000949	Newport
SRR10001039	Braenderup
SRR10001078	Anatum
SRR10001107	Enteritidis
SRR10001131	Enteritidis
SRR10001138	Braenderup
SRR10001145	Newport
SRR10002523	Braenderup
SRR10003128	Uganda
SRR10003372	Newport
SRR10003377	Infantis
SRR10003399	Oranienburg
SRR10003407	Newport
SRR10003410	Bovismorbificans
SRR10003422	Bovismorbificans
SRR10003429	Typhimurium
SRR10003590	Newport
SRR10003593	Berta
SRR10003614	Newport
SRR10003621	Enteritidis
SRR10003646	Enteritidis
SRR10005454	Newport
SRR10005839	Enteritidis
SRR10005846	Typhimurium
SRR10005859	Uganda
SRR10006706	Enteritidis
SRR10006729	Bovismorbificans
SRR10006958	Agbeni
SRR10006963	Bovismorbificans
SRR10007619	Bovismorbificans
SRR10007621	Bovismorbificans
SRR10008968	Newport
SRR10008978	Bovismorbificans
SRR10009328	Newport
SRR10009336	Newport
SRR10009531	Newport
SRR10009536	Bovismorbificans
SRR10009643	Montevideo
SRR10009649	Javiana
SRR10009652	Albany
SRR10009837	Newport
SRR10009843	Enteritidis
SRR10009847	Anatum
SRR10009900	Oranienburg
SRR10010211	Typhi
SRR10010402	Typhimurium
SRR10010403	Typhimurium
SRR10010405	Typhimurium
SRR10010422	Typhimurium
SRR10010425	Agbeni
SRR10010434	Manhattan
SRR10010447	Typhimurium
SRR10010937	Bovismorbificans
SRR10010940	Bovismorbificans
SRR10010954	Bovismorbificans
SRR10010955	Enteritidis
SRR10011497	Bovismorbificans
SRR10011577	Adelaide
SRR10011579	Oranienburg
SRR10012239	Newport
SRR10012242	Enteritidis
SRR10012243	London
SRR10012244	Enteritidis
SRR10012362	Montevideo
SRR10012364	Guinea
SRR10013031	IIIa 48:g,z51:-
SRR10013465	Braenderup
SRR10013527	Newport
SRR10013529	Newport
SRR10013592	Thompson
SRR10013601	Enteritidis
SRR10013605	Agona
SRR10013616	Javiana
SRR10015234	Enteritidis
SRR10015235	Typhimurium
SRR10015237	Newport
SRR10015239	Braenderup
SRR10015890	Newport
SRR10015902	Newport
SRR10016025	Typhimurium
SRR10016032	Agbeni
SRR10016033	Infantis
SRR10016036	Javiana
SRR10016061	Newport
SRR10016087	Typhimurium
SRR10016104	Enteritidis
SRR10016940	London
SRR10016943	London
SRR10016946	Infantis
SRR10016953	Enteritidis
SRR10017018	Infantis
SRR10017084	London
SRR10017201	Bovismorbificans
SRR10017202	Bovismorbificans
SRR10017417	Typhimurium
SRR10017419	Adelaide
SRR10017422	Braenderup
SRR10017640	Bovismorbificans
SRR10017643	Enteritidis
SRR10017644	Berta
SRR10018024	Blockley
SRR10018370	Newport
SRR10018372	Newport
SRR10018386	Typhimurium
SRR10018503	Agona
SRR10018514	Norwich
SRR10018561	Braenderup
SRR10018710	I 4:i:-
SRR10018712	I 4:i:-
SRR10018727	Anatum
SRR10018796	Strathcona
SRR10019046	Braenderup
SRR10023482	Cerro
SRR10023488	Cerro
SRR10023906	Enteritidis
SRR10023913	Typhimurium
SRR10024034	Typhi
SRR10024051	Newport
SRR10024071	Typhimurium
SRR10024608	Braenderup
SRR10024619	Typhimurium
SRR10024635	Infantis
SRR10024655	Montevideo
SRR10024675	Enteritidis
SRR10024917	Braenderup
SRR10024945	Enteritidis
SRR10026069	I 4:i:-
SRR10026072	I 4:i:-
SRR10026074	I 4:i:-
SRR10026444	Enteritidis
SRR10026499	Typhi
SRR10026508	Typhi
SRR10026524	Typhimurium
SRR10026530	I 4:i:-
SRR10026549	Bovismorbificans
SRR10026560	Newport
SRR10027402	Dublin
SRR10027552	Dublin
SRR10027554	Dublin
SRR10028745	Enteritidis
SRR10029298	Typhi
SRR10029609	Braenderup
SRR10029627	Enteritidis
SRR10029628	Enteritidis
SRR10029631	Montevideo
SRR10029642	Newport
SRR10029651	Montevideo
SRR10029657	Typhi
SRR10029813	Manhattan
SRR10030020	Bovismorbificans
SRR10030067	Newport
SRR10030196	Montevideo
SRR10030378	Adelaide
SRR10030645	Newport
SRR10031119	Dublin
SRR10031158	Braenderup
SRR10031164	Virchow
SRR10031170	Newport
SRR10031172	Virchow
SRR10031175	Newport
SRR10031177	Oranienburg
SRR10031280	Newport
SRR10031335	Typhi
SRR10034000	I -:g,m,s:-
SRR10034311	Typhimurium
SRR10034726	Enteritidis
SRR10034746	Blockley
SRR10034868	Braenderup
SRR10034987	Newport
SRR10034997	Banana
SRR10035008	Typhimurium
SRR10035012	Newport
SRR10035018	Newport
SRR10035033	Newport
SRR10035317	Newport
SRR10035358	Braenderup
SRR10035371	Typhimurium
SRR10035401	Montevideo
SRR10035890	Montevideo
SRR10035893	Infantis
SRR10035896	Enteritidis
SRR10036092	Enteritidis
SRR10036096	Infantis
SRR10036382	Thompson
SRR10036387	Newport
SRR10036395	Newport
SRR10036404	Typhimurium
SRR10036407	Typhimurium
SRR10036414	Typhi
SRR10036489	Typhimurium
SRR10036492	Typhimurium
SRR10036505	Dublin
SRR10037016	Newport
SRR10037024	Enteritidis
SRR10037034	Reading
SRR10037035	Reading
SRR10037036	Reading
SRR10037037	Reading
SRR10037038	Reading
SRR10037039	Reading
SRR10037040	Reading
SRR10037041	Reading
SRR10037042	Reading
SRR10037219	Typhimurium
SRR10037226	Newport
SRR10037230	Norwich
SRR10037280	Enteritidis
SRR10037293	Enteritidis
SRR10037315	Typhi
SRR10037319	Typhimurium
SRR10037322	Typhimurium
SRR10037347	Virchow
SRR10037353	Dublin
SRR10037355	Oranienburg
SRR10037477	Bovismorbificans
SRR10037851	Muenchen
SRR10037862	Dublin
SRR10037909	Newport
SRR10038624	Typhimurium
SRR10038629	Typhi
SRR10038638	Typhimurium
SRR10038976	Enteritidis
SRR10039099	Enteritidis
SRR10042148	Heidelberg
SRR10042367	Enteritidis
SRR10042386	Braenderup
SRR10042390	Enteritidis
SRR10042796	Infantis
SRR10042979	Braenderup
SRR10043662	Adelaide
SRR10043666	Enteritidis
SRR10049403	Oranienburg
SRR10049447	Enteritidis
SRR10049875	Montevideo
SRR10049878	Newport
SRR10049925	Infantis
SRR10049933	Montevideo
SRR10050017	Enteritidis
SRR10050060	Typhimurium
SRR10050118	Heidelberg
SRR10051114	Enteritidis
SRR10059363	Braenderup
SRR10059364	Newport
SRR10059402	Typhi
SRR10059554	Enteritidis
SRR10059581	Enteritidis
SRR10060559	Dublin
SRR10060633	Enteritidis
SRR10060635	Paratyphi B var. L(+) tartrate+
SRR10060651	Typhi
SRR10060656	I 4:i:-
SRR10060657	Thompson
SRR10061028	Typhi
SRR10061089	I 4:i:-
SRR10061153	Newport
SRR10062485	Enteritidis
SRR10063087	Manhattan
SRR10063111	Norwich
SRR10063213	Dublin
SRR10063254	Enteritidis
SRR10063330	Typhimurium
SRR10063438	Agona
SRR10063667	Enteritidis
SRR10063671	Thompson
SRR10065865	Typhimurium
SRR10066066	Typhimurium
SRR10066300	Enteritidis
SRR10066664	Bovismorbificans
SRR10066668	Thompson
SRR10066838	Typhi
SRR10066847	Typhimurium
SRR10067265	Braenderup
SRR10067279	Braenderup
SRR10067282	Enteritidis
SRR10067284	Braenderup
SRR10067716	Enteritidis
SRR10067809	Berta
SRR10067899	Enteritidis
SRR10067903	Typhimurium
SRR10067909	Infantis
SRR10067911	Newport
SRR10067912	Infantis
SRR10067913	Infantis
SRR10067917	Infantis
SRR10067918	Infantis
SRR10067919	London
SRR10067921	Infantis
SRR10067923	Newport
SRR10067924	Newport
SRR10067999	I 4:i:-
SRR10068214	London
SRR10068919	Typhimurium
SRR10068920	Enteritidis
SRR10068923	Enteritidis
SRR10068927	Newport
SRR10068971	Thompson
SRR10068975	Enteritidis
SRR10068979	Berta
SRR10069009	I 4:i:-
SRR10069010	Enteritidis
SRR10070409	Enteritidis
SRR10070443	Enteritidis
SRR10071612	Braenderup
SRR10071622	I 4:i:-
SRR10072439	Hadar
SRR10072527	Typhimurium
SRR10072541	Typhimurium
SRR10072548	Enteritidis
SRR10074422	Newport
SRR10074437	Bovismorbificans
SRR10075111	Montevideo
SRR10075116	Typhimurium
SRR10075121	Montevideo
SRR10075122	Enteritidis
SRR10075123	Enteritidis
SRR10075139	Bovismorbificans
SRR10075332	Agbeni
SRR10075960	Enteritidis
SRR10078168	Typhi
SRR10078190	Typhi
SRR10078284	Enteritidis
SRR10079507	Braenderup
SRR10079521	Bovismorbificans
SRR10079523	Guinea
SRR10079541	Berta
SRR10081732	Typhimurium
SRR10081735	Thompson
SRR10081738	Thompson
SRR10082190	Typhi
SRR10082377	Enteritidis
SRR10084373	Braenderup
SRR10084376	Typhimurium
SRR10084378	Blockley
SRR10084380	Enteritidis
SRR10084385	Typhimurium
SRR10084389	Newport
SRR10084937	I 4:i:-
SRR10084946	Bovismorbificans
SRR10087046	Enteritidis
SRR10087806	Anatum
SRR10087908	Enteritidis
SRR10088401	I 4:i:-
SRR10088403	Newport
SRR10088410	Braenderup
SRR10088466	Typhi
SRR10088539	Braenderup
SRR10088546	Newport
SRR10088547	Typhimurium
SRR10088560	Typhimurium
SRR10088571	Typhimurium
SRR10088575	Enteritidis
SRR10088578	Typhimurium
SRR10088656	Typhimurium
SRR10088664	Typhimurium
SRR10090171	Norwich
SRR10090173	Newport
SRR10090188	Typhimurium
SRR10090192	Anatum
SRR10090200	Typhimurium
SRR10090202	Typhimurium
SRR10090205	I 4:i:-
SRR10092273	Typhi
SRR10092506	Agbeni
SRR10093185	Enteritidis
SRR10093190	Enteritidis
SRR10093199	Alachua
SRR10093209	Montevideo
SRR10094030	Braenderup
SRR10094653	Typhimurium
SRR10094654	Typhimurium
SRR10094680	Typhimurium
SRR10095186	Infantis
SRR10095187	London
SRR10095188	I 4:i:-
SRR10095189	Infantis
SRR10095190	Infantis
SRR10095191	London
SRR10095192	Infantis
SRR10095193	London
SRR10095194	Infantis
SRR10095195	London
SRR10095196	London
SRR10095288	Enteritidis
SRR10095289	Infantis
SRR10095599	Berta
SRR10095838	I 4:i:-
SRR10095882	Enteritidis
SRR10095981	Enteritidis
SRR10096000	Enteritidis
SRR10096007	Montevideo
SRR10096034	Enteritidis
SRR10096389	Typhimurium
SRR10096546	Berta
SRR10096816	Thompson
SRR10096825	I 4:i:-
SRR10096964	Enteritidis
SRR10097217	Agona
SRR10097221	I 4:i:-
SRR10097222	Agona
SRR10097231	Dublin
SRR10097232	Anatum
SRR10097571	Typhimurium
SRR10097575	Braenderup
SRR10097580	Typhi
SRR10097583	I 4:i:-
SRR10097585	Typhimurium
SRR10097587	Typhimurium
SRR10097619	Enteritidis
SRR10097620	Enteritidis
SRR10099747	Enteritidis
SRR10100193	Newport
SRR10100194	Newport
SRR10100196	Typhimurium
SRR10102816	Enteritidis
SRR10102823	I 4:i:-
SRR10103836	Enteritidis
SRR10103878	Enteritidis
SRR10103906	Enteritidis
SRR10103910	Infantis
SRR10103917	Newport
SRR10106556	Bovismorbificans
SRR10107509	Typhi
SRR10107515	Thompson
SRR10107525	Berta
SRR10107526	Adelaide
SRR10108407	Newport
SRR10108699	Albany
SRR10109389	Norwich
SRR10113017	Albany
SRR10113021	Bovismorbificans
SRR10113023	Montevideo
SRR10113045	Enteritidis
SRR10113046	Albany
SRR10113047	Blockley
SRR10113088	Enteritidis
SRR10113091	Enteritidis
SRR10113147	Enteritidis
SRR10113195	Enteritidis
SRR10113196	Enteritidis
SRR10113226	Bovismorbificans
SRR10113597	Enteritidis
SRR10113612	Dublin
SRR10114247	Braenderup
SRR10115349	Dublin
SRR10117608	Enteritidis
SRR10117781	Agona
SRR10118960	Typhimurium
SRR10118997	Enteritidis
SRR10118998	I 4:i:-
SRR10119328	Manhattan
SRR10119500	Virchow
SRR10120209	Anatum
SRR10120214	Enteritidis
SRR10120215	Manhattan
SRR10120219	Montevideo
SRR10123345	Bovismorbificans
SRR10123347	Typhimurium
SRR10123349	Typhimurium
SRR10123350	Typhimurium
SRR10123354	Albany
SRR10123442	Enteritidis
SRR10123519	Infantis
SRR10124951	I 4:i:-
SRR10126378	Enteritidis
SRR10126389	Enteritidis
SRR10126457	Dublin
SRR10129116	Blockley
SRR10129554	Braenderup
SRR10129587	Montevideo
SRR10129687	Bovismorbificans
SRR10129688	Enteritidis
SRR10130086	Javiana
SRR10130785	Enteritidis
SRR10131306	Newport
SRR10131491	Enteritidis
SRR10132356	Braenderup
SRR10132954	Typhimurium
SRR10132955	Bovismorbificans
SRR10132963	I -:m,t:-
SRR10133071	Braenderup
SRR10133076	Enteritidis
SRR10133169	Enteritidis
SRR10133195	Newport
SRR10133199	Infantis
SRR10133200	Infantis
SRR10134376	Enteritidis
SRR10135918	Typhimurium
SRR10135924	Berta
SRR10135935	Blockley
SRR10135937	Typhimurium
SRR10135938	Typhimurium
SRR10135945	Albany
SRR10135947	Blockley
SRR10136047	Braenderup
SRR10136135	Infantis
SRR10136229	Enteritidis
SRR10136238	Infantis
SRR10136263	Newport
SRR10137207	Enteritidis
SRR10137396	Enteritidis
SRR10137436	Montevideo
SRR10138120	Bovismorbificans
SRR10138139	Enteritidis
SRR10138141	Enteritidis
SRR10138142	Braenderup
SRR10138192	Blockley
SRR10138204	Typhimurium
SRR10138207	Blockley
SRR10138324	Infantis
SRR10138335	Dublin
SRR10138339	Typhimurium
SRR10138341	Oranienburg
SRR10138403	Bovismorbificans
SRR10138404	Typhimurium
SRR10139847	Berta
SRR10140390	Braenderup
SRR10140399	Newport
SRR10143262	Braenderup
SRR10144814	Typhi
SRR10148500	Typhi
SRR10148511	Enteritidis
SRR10148677	Newport
SRR10148682	Bovismorbificans
SRR10148894	Infantis
SRR10149828	Enteritidis
SRR10152108	Braenderup
SRR10152109	Infantis
SRR10152526	Blockley
SRR10152528	I 4:i:-
SRR10152532	Typhimurium
SRR10152539	Anatum
SRR10152606	Berta
SRR10152610	Enteritidis
SRR10152622	Enteritidis
SRR10153646	Braenderup
SRR10153950	Dublin
SRR10154437	Agbeni
SRR10155266	Enteritidis
SRR10155286	Infantis
SRR10156246	Agona
SRR10156337	Newport
SRR10156342	Virchow
SRR10156344	Javiana
SRR10156810	Anatum
SRR10160698	Typhimurium
SRR10160724	Typhimurium
SRR10162501	Typhi
SRR10162638	Enteritidis
SRR10162652	Enteritidis
SRR10163289	Montevideo
SRR10163296	Agbeni
SRR10163362	Enteritidis
SRR10163880	Heidelberg
SRR10163900	Enteritidis
SRR10163957	Braenderup
SRR10164008	Enteritidis
SRR10164010	Typhi
SRR10164032	Heidelberg
SRR10164088	Enteritidis
SRR10164144	Thompson
SRR10164550	Typhimurium
SRR10165142	Enteritidis
SRR10166517	Enteritidis
SRR10169046	Typhimurium
SRR10172210	Typhimurium
SRR10172212	Javiana
SRR10172213	Infantis
SRR10172222	Agbeni
SRR10172227	Enteritidis
SRR10172230	Typhimurium
SRR10172262	Enteritidis
SRR10173050	Enteritidis
SRR10173051	Heidelberg
SRR10173318	Braenderup
SRR10173424	Infantis
SRR10173561	Infantis
SRR10174327	Albany
SRR10174328	Enteritidis
SRR10174352	Javiana
SRR10174589	Enteritidis
SRR10175707	Enteritidis
SRR10176057	Oranienburg
SRR10176063	Braenderup
SRR10176066	Virchow
SRR10176078	Dublin
SRR10177397	Typhi
SRR10177415	Enteritidis
SRR10177425	Infantis
SRR10177508	Agona
SRR10177512	Infantis
SRR10177523	Enteritidis
SRR10178533	Newport
SRR10178616	Blockley
SRR10179329	Newport
SRR10179705	I -:f,g,t:-
SRR10179706	Enteritidis
SRR10182646	Enteritidis
SRR10186717	Typhimurium
SRR10186943	I 4:i:-
SRR10186957	Montevideo
SRR10187052	Heidelberg
SRR10189174	Enteritidis
SRR10189368	I 4:i:-
SRR10189386	Typhi
SRR10189390	Enteritidis
SRR10189399	Adelaide
SRR10189406	Typhi
SRR10189702	Typhimurium
SRR10190063	Virchow
SRR10190310	Heidelberg
SRR10190333	Berta
SRR10190429	Enteritidis
SRR10190491	Adelaide
SRR10190619	Enteritidis
SRR10190802	Infantis
SRR10192153	Infantis
SRR10194316	Montevideo
SRR10194892	Oranienburg
SRR10196246	Montevideo
SRR10196250	Agona
SRR10196253	Infantis
SRR10196344	Enteritidis
SRR10196345	Enteritidis
SRR10196404	Enteritidis
SRR10196406	Enteritidis
SRR10196408	Enteritidis
SRR10196409	Enteritidis
SRR10197213	Infantis
SRR10197345	Infantis
SRR10197441	Berta
SRR10198988	Typhimurium
SRR10202207	Albany
SRR10202211	Bovismorbificans
SRR10203101	Javiana
SRR10203286	Typhimurium
SRR10203801	Typhi
SRR10205834	Braenderup
SRR10205850	Enteritidis
SRR10207117	Thompson
SRR10207190	Newport
SRR10207376	Typhimurium
SRR10207383	Blockley
SRR10207461	Berta
SRR10207472	Thompson
SRR10209578	Typhimurium
SRR10209579	Enteritidis
SRR10209580	Typhimurium
SRR10210061	Enteritidis
SRR10210072	Enteritidis
SRR10210179	Berta
SRR10210306	Braenderup
SRR10210307	Virchow
SRR10210310	Enteritidis
SRR10210312	Norwich
SRR10210531	Berta
SRR10210534	Agbeni
SRR10210543	Javiana
SRR10210544	Infantis
SRR10210548	Typhimurium
SRR10210595	Typhimurium
SRR10211367	Enteritidis
SRR10211386	Enteritidis
SRR10211597	Enteritidis
SRR10211893	Javiana
SRR10212238	Virchow
SRR10212891	Enteritidis
SRR10212957	Bovismorbificans
SRR10212963	Bovismorbificans
SRR10215591	Javiana
SRR10215603	Typhi
SRR10215829	Enteritidis
SRR10215839	Norwich
SRR10215842	Heidelberg
SRR10215848	Enteritidis
SRR10215885	I 4:i:-
SRR10215937	Braenderup
SRR10216486	Blockley
SRR10217884	Norwich
SRR10219449	Enteritidis
SRR10219450	Enteritidis
SRR10219452	Enteritidis
SRR10219458	Enteritidis
SRR10219468	Enteritidis
SRR10220740	Braenderup
SRR10222155	Enteritidis
SRR10222157	Newport
SRR10222160	Virchow
SRR10222166	Virchow
SRR10222167	Virchow
SRR10222575	Typhimurium
SRR10222619	Enteritidis
SRR10222621	Typhimurium
SRR10222641	Dublin
SRR10222642	Dublin
SRR10222664	Berta
SRR10224610	Infantis
SRR10224622	Braenderup
SRR10224793	Enteritidis
SRR10224794	Enteritidis
SRR10224798	Enteritidis
SRR10224799	Agona
SRR10224802	Enteritidis
SRR10224853	Braenderup
SRR10224861	Enteritidis
SRR10225345	Agbeni
SRR10225426	Braenderup
SRR10226262	Blockley
SRR10226366	Albany
SRR10226809	Berta
SRR10228037	Braenderup
SRR10228038	Heidelberg
SRR10228562	Berta
SRR10228590	Enteritidis
SRR10228607	Norwich
SRR10228798	Virchow
SRR10228901	Typhi
SRR10228907	Typhimurium
SRR10230002	Heidelberg
SRR10230173	Newport
SRR10230190	Thompson
SRR10230196	Thompson
SRR10230203	I 4:i:-
SRR10230587	Bovismorbificans
SRR10231457	Enteritidis
SRR10231460	Javiana
SRR10231462	Guinea
SRR10231601	Albany
SRR10231944	Blockley
SRR10231965	Albany
SRR10231974	I 4:i:-
SRR10231975	I 4:i:-
SRR10232010	Norwich
SRR10232052	Javiana
SRR10232060	Enteritidis
SRR10232202	Enteritidis
SRR10233319	Enteritidis
SRR10237440	Agbeni
SRR10237441	Enteritidis
SRR10237444	Guinea
SRR10237446	Blockley
SRR10237648	Heidelberg
SRR10239228	Berta
SRR10239231	Berta
SRR10239448	Albany
SRR10242915	Enteritidis
SRR10242916	Enteritidis
SRR10244465	Javiana
SRR10244473	Guinea
SRR10244484	Infantis
SRR10244757	Adelaide
SRR10244954	Enteritidis
SRR10244981	Typhimurium
SRR10244986	Javiana
SRR10245369	Javiana
SRR10245376	Thompson
SRR10245381	Bovismorbificans
SRR10245393	Javiana
SRR10245600	Typhi
SRR10246238	Enteritidis
SRR10246242	Enteritidis
SRR10247023	Enteritidis
SRR10247478	Typhimurium
SRR10247484	Javiana
SRR10247485	Javiana
SRR10247622	Thompson
SRR10247759	Enteritidis
SRR10247770	Infantis
SRR10247830	Adelaide
SRR10249865	Enteritidis
SRR10250675	Montevideo
SRR10250684	Javiana
SRR10250687	Typhimurium
SRR10250977	Enteritidis
SRR10251215	Javiana
SRR10251576	Enteritidis
SRR10252093	Enteritidis
SRR10252094	Typhimurium
SRR10252096	Bovismorbificans
SRR10252152	Infantis
SRR10253494	Javiana
SRR10253522	Enteritidis
SRR10253526	Typhimurium
SRR10253529	Berta
SRR10254384	Infantis
SRR10254617	Javiana
SRR10254713	Typhimurium
SRR10254717	I -:f,g:-
SRR10254719	Infantis
SRR10254732	Enteritidis
SRR10254827	Thompson
SRR10254831	Bovismorbificans
SRR10254863	Newport
SRR10254970	Bovismorbificans
SRR10254984	Berta
SRR10254986	Adelaide
SRR10254989	Dublin
SRR10257112	Enteritidis
SRR10257117	Braenderup
SRR10257341	Infantis
SRR10257373	Norwich
SRR10257868	I 4:i:-
SRR10257888	Typhi
SRR10257916	Javiana
SRR10257918	Enteritidis
SRR10258175	Javiana
SRR10258218	Enteritidis
SRR10258226	Typhimurium
SRR10258235	Enteritidis
SRR10258293	Enteritidis
SRR10258540	Infantis
SRR10258858	Javiana
SRR10259112	Javiana
SRR10259157	Infantis
SRR10259175	Enteritidis
SRR10259178	Enteritidis
SRR10259216	Newport
SRR10259309	Virchow
SRR10261587	Javiana
SRR10267574	Typhimurium
SRR10267781	Enteritidis
SRR10267782	Enteritidis
SRR10267828	Albany
SRR10269621	Dublin
SRR10270281	Typhimurium
SRR10270548	Infantis
SRR10273576	Enteritidis
SRR10273615	Javiana
SRR10273629	Norwich
SRR10274242	Bovismorbificans
SRR10276207	Enteritidis
SRR10276214	Berta
SRR10276294	Enteritidis
SRR10276296	Enteritidis
SRR10276315	I 4:i:-
SRR10276323	I 4:i:-
SRR10276324	Adelaide
SRR10276328	I 4:i:-
SRR10276330	Typhimurium
SRR10276416	Enteritidis
SRR10277894	Enteritidis
SRR10277918	Bovismorbificans
SRR10277924	I 4:i:-
SRR10277937	Braenderup
SRR10278326	Montevideo
SRR10278399	Enteritidis
SRR10278402	Enteritidis
SRR10278949	Javiana
SRR10279502	Enteritidis
SRR10279818	Javiana
SRR10279850	Typhimurium
SRR10281028	Montevideo
SRR10281892	Braenderup
SRR10282973	Heidelberg
SRR10283191	Enteritidis
SRR10283233	Javiana
SRR10285487	Javiana
SRR10285825	Javiana
SRR10286375	Javiana
SRR10286831	Enteritidis
SRR10286862	Enteritidis
SRR10286865	Virchow
SRR10286925	Enteritidis
SRR10286978	Enteritidis
SRR10287713	Dublin
SRR10287715	Heidelberg
SRR10288683	Bovismorbificans
SRR10288684	Bovismorbificans
SRR10288687	Enteritidis
SRR10288688	Adelaide
SRR10290628	Enteritidis
SRR10290639	Infantis
SRR10290650	Infantis
SRR10291484	Braenderup
SRR10291486	Enteritidis
SRR10292479	Typhimurium
SRR10292487	Berta
SRR10292490	Berta
SRR10292524	Enteritidis
SRR10292528	Enteritidis
SRR10293974	Heidelberg
SRR10294311	Bovismorbificans
SRR10295192	Heidelberg
SRR1029566	Maastricht
SRR10298111	Enteritidis
SRR10298124	I 4:i:-
SRR10302365	Javiana
SRR10302639	Enteritidis
SRR10303267	Enteritidis
SRR10303270	Javiana
SRR10303271	Enteritidis
SRR10303272	Enteritidis
SRR10303371	Enteritidis
SRR10307607	Enteritidis
SRR10309555	Enteritidis
SRR10309566	Infantis
SRR10309567	Infantis
SRR10309570	Javiana
SRR10309643	London
SRR10309645	Strathcona
SRR10309656	Agbeni
SRR10309662	I 4:i:-
SRR10309666	Infantis
SRR10309671	Braenderup
SRR10309687	Braenderup
SRR10309689	Braenderup
SRR10309697	Infantis
SRR10309699	Enteritidis
SRR10309704	Infantis
SRR10309749	Enteritidis
SRR10309767	Enteritidis
SRR10309893	Enteritidis
SRR10309897	Newport
SRR10309898	Typhimurium
SRR10309907	Typhimurium
SRR10309910	Enteritidis
SRR10309912	Infantis
SRR10309919	Bovismorbificans
SRR10309957	Newport
SRR10309970	Typhimurium
SRR10309971	Newport
SRR10309976	Bovismorbificans
SRR10310261	Berta
SRR10310262	I 4:i:-
SRR10310263	I 4:i:-
SRR10310265	I 4:i:-
SRR10310274	I 4:i:-
SRR10310363	Berta
SRR10310364	Thompson
SRR10311598	Enteritidis
SRR10311777	Enteritidis
SRR10311781	Enteritidis
SRR10311911	Heidelberg
SRR10311927	Javiana
SRR10313561	Berta
SRR10317003	Javiana
SRR10317025	Javiana
SRR10320789	I 4:i:-
SRR10321176	Oranienburg
SRR10322242	Typhimurium
SRR10322534	Montevideo
SRR10322548	Javiana
SRR10323621	Heidelberg
SRR10325385	Dublin
SRR10325483	Norwich
SRR10325519	Adelaide
SRR10325529	Typhimurium
SRR10325539	I 4:i:-
SRR10326035	Typhimurium
SRR10326036	Infantis
SRR10326081	Javiana
SRR10326326	Typhi
SRR10333968	Javiana
SRR10333990	Javiana
SRR10334718	Javiana
SRR10334746	Enteritidis
SRR10335820	Infantis
SRR10335944	Dublin
SRR10336112	Thompson
SRR10336152	Thompson
SRR10336422	Javiana
SRR10336950	Typhimurium
SRR10337549	Enteritidis
SRR10337550	Enteritidis
SRR10337588	Enteritidis
SRR10340297	Enteritidis
SRR10340334	Javiana
SRR10340450	Infantis
SRR10340458	Typhimurium
SRR10340468	Montevideo
SRR10340471	Typhimurium
SRR10340484	Javiana
SRR10340492	Enteritidis
SRR10340502	Typhimurium
SRR10340505	Typhimurium
SRR10340756	Heidelberg
SRR10340899	Montevideo
SRR10341526	Typhimurium
SRR10341778	Virchow
SRR10341842	Typhimurium
SRR10341851	Enteritidis
SRR10341857	Enteritidis
SRR10341896	Albany
SRR10342345	Enteritidis
SRR10343283	Enteritidis
SRR10345434	Heidelberg
SRR10348618	Newport
SRR10348620	Enteritidis
SRR10350296	Heidelberg
SRR10355970	Thompson
SRR10356363	Berta
SRR10356378	Enteritidis
SRR10356380	Thompson
SRR10356381	Dublin
SRR10356382	Thompson
SRR10357409	Typhimurium
SRR10357423	Typhimurium
SRR10359904	Javiana
SRR10359907	Javiana
SRR10359910	Javiana
SRR10359913	Javiana
SRR10360076	I 4:i:-
SRR10360424	Enteritidis
SRR10360432	Javiana
SRR10360437	Paratyphi B var. L(+) tartrate+
SRR10360905	Enteritidis
SRR10360932	Enteritidis
SRR10364843	Braenderup
SRR10366835	Paratyphi B var. L(+) tartrate+
SRR10366921	Telelkebir
SRR10367942	Heidelberg
SRR10368294	Typhimurium
SRR10368387	Braenderup
SRR10375758	Enteritidis
SRR10375865	Enteritidis
SRR10377294	Javiana
SRR10377300	Javiana
SRR10377346	Oranienburg
SRR10377505	Norwich
SRR10378089	Montevideo
SRR10378093	Norwich
SRR10381304	Typhi
SRR10382852	Enteritidis
SRR10382854	Enteritidis
SRR10382857	Enteritidis
SRR10383467	I 4:i:-
SRR10383485	Newport
SRR10384073	Javiana
SRR10384074	Javiana
SRR10384338	Enteritidis
SRR10384615	Heidelberg
SRR10386564	Norwich
SRR10386565	Enteritidis
SRR10389033	Typhimurium
SRR10389058	Enteritidis
SRR10389062	Enteritidis
SRR10389071	Braenderup
SRR10389108	Enteritidis
SRR10392058	Braenderup
SRR10392060	Enteritidis
SRR10392487	Javiana
SRR10392509	Enteritidis
SRR10392523	Blockley
SRR10392527	Enteritidis
SRR10392533	Braenderup
SRR10392534	Anatum
SRR10392538	Anatum
SRR10392542	Enteritidis
SRR10392543	I -:m,t:-
SRR10392546	Paratyphi B var. L(+) tartrate+
SRR10392557	Enteritidis
SRR10392716	Enteritidis
SRR10393128	Heidelberg
SRR10394051	Enteritidis
SRR10394052	Thompson
SRR10394067	Enteritidis
SRR10394079	Paratyphi B var. L(+) tartrate+
SRR10395059	Dublin
SRR10395201	Paratyphi B var. L(+) tartrate+
SRR10395202	Javiana
SRR10398038	Enteritidis
SRR10400484	Enteritidis
SRR10400485	Heidelberg
SRR10400494	Enteritidis
SRR10403183	Typhimurium
SRR10403208	Javiana
SRR10403244	Braenderup
SRR10403332	Javiana
SRR10403335	Javiana
SRR10403348	Javiana
SRR10403369	Enteritidis
SRR10403371	Newport
SRR10403381	Virchow
SRR10403383	Thompson
SRR10403401	Enteritidis
SRR10403487	Typhimurium
SRR10403615	Newport
SRR10403861	Enteritidis
SRR10405292	Enteritidis
SRR10405297	Enteritidis
SRR10405299	Enteritidis
SRR10405307	Berta
SRR10405340	Thompson
SRR10405342	Berta
SRR10405345	Norwich
SRR10405357	Thompson
SRR10412085	Dublin
SRR10412623	Enteritidis
SRR10412627	Enteritidis
SRR10412632	Enteritidis
SRR10412635	Infantis
SRR10413912	Braenderup
SRR10414529	Javiana
SRR10418289	Braenderup
SRR10418399	Norwich
SRR10418434	Enteritidis
SRR10418706	Oranienburg
SRR10418714	Javiana
SRR10419467	Heidelberg
SRR10419471	Enteritidis
SRR10419478	Javiana
SRR10419480	Heidelberg
SRR10420667	Enteritidis
SRR10420671	Typhimurium
SRR10420831	Typhi
SRR10420835	Berta
SRR10420840	Newport
SRR10420846	Typhimurium
SRR10425329	Dublin
SRR10426626	Newport
SRR10426639	Enteritidis
SRR10427742	Typhimurium
SRR10427744	Typhimurium
SRR10427922	Braenderup
SRR10429152	Braenderup
SRR10429154	Enteritidis
SRR10429190	Enteritidis
SRR10429208	Enteritidis
SRR10429893	Enteritidis
SRR10430063	Typhimurium
SRR10430220	Typhimurium
SRR10430290	Heidelberg
SRR10430402	Enteritidis
SRR10430463	Enteritidis
SRR10431092	Enteritidis
SRR10431661	Typhimurium
SRR10435146	Enteritidis
SRR10435763	Telelkebir
SRR10435840	Typhi
SRR10435845	Enteritidis
SRR10436176	Enteritidis
SRR10436178	Javiana
SRR10436574	Enteritidis
SRR10436906	Berta
SRR10436912	Enteritidis
SRR10436915	Enteritidis
SRR10436916	Enteritidis
SRR10438088	Paratyphi B var. L(+) tartrate+
SRR10438103	Typhimurium
SRR10438657	Enteritidis
SRR10438660	Enteritidis
SRR10438673	Enteritidis
SRR10438675	Enteritidis
SRR10438690	Enteritidis
SRR10438693	Enteritidis
SRR10438694	Enteritidis
SRR10438698	Enteritidis
SRR10438788	Enteritidis
SRR10438836	Enteritidis
SRR10438932	Enteritidis
SRR10441197	Braenderup
SRR10442241	Dublin
SRR10442242	Enteritidis
SRR10443619	Javiana
SRR10443621	Javiana
SRR10443648	Newport
SRR10443653	Manhattan
SRR10444414	Anatum
SRR10444601	Braenderup
SRR10445048	Newport
SRR10445056	Enteritidis
SRR10445513	Dublin
SRR10445529	Enteritidis
SRR10445542	Newport
SRR10448234	Muenchen
SRR10448885	Newport
SRR10448893	I 4:i:-
SRR10452769	Paratyphi B var. L(+) tartrate+
SRR10452776	Berta
SRR10452777	Newport
SRR10454474	Montevideo
SRR10454480	Strathcona
SRR10479245	Enteritidis
SRR10479247	Thompson
SRR10480651	Braenderup
SRR10482300	Typhimurium
SRR10482304	Thompson
SRR10482310	Typhimurium
SRR10482312	Enteritidis
SRR10482330	Thompson
SRR10482486	Enteritidis
SRR10482923	Enteritidis
SRR10484083	Typhimurium
SRR10484535	I 4:i:-
SRR10484541	Thompson
SRR10484621	Typhimurium
SRR10489378	Albany
SRR10489383	Braenderup
SRR10489463	Dublin
SRR10489842	Typhimurium
SRR10490433	Enteritidis
SRR10490478	Heidelberg
SRR10490624	Enteritidis
SRR10491305	Dublin
SRR10491348	Infantis
SRR10491472	Enteritidis
SRR10491513	Typhimurium
SRR10491517	Typhimurium
SRR10491519	Thompson
SRR10492771	Enteritidis
SRR10492788	Braenderup
SRR10493604	Dublin
SRR10493606	Dublin
SRR10493632	Dublin
SRR10493657	Dublin
SRR10499169	Typhimurium
SRR10499993	Enteritidis
SRR10499994	Enteritidis
SRR10500072	Newport
SRR10500079	Newport
SRR10500082	Newport
SRR10500084	Newport
SRR10500089	Enteritidis
SRR10500091	Newport
SRR10500092	Newport
SRR10500284	Paratyphi B var. L(+) tartrate+
SRR10500285	Newport
SRR10500292	I -:k:1,5
SRR10500293	Enteritidis
SRR10500304	Typhimurium
SRR10500346	Typhimurium
SRR10501594	Thompson
SRR10501595	Thompson
SRR10501596	Thompson
SRR10501597	Thompson
SRR10501598	Thompson
SRR10501599	Thompson
SRR10501600	Thompson
SRR10501601	Thompson
SRR10501609	Thompson
SRR10501610	Thompson
SRR10501668	Thompson
SRR10501669	Thompson
SRR10501670	Thompson
SRR10501671	Thompson
SRR10501672	Thompson
SRR10501673	Thompson
SRR10502057	Infantis
SRR10502120	Oranienburg
SRR10502127	Newport
SRR10505910	Typhi
SRR10506450	Enteritidis
SRR10506973	Enteritidis
SRR10506974	Enteritidis
SRR10506975	Enteritidis
SRR10507059	Enteritidis
SRR10507235	Enteritidis
SRR10507236	Enteritidis
SRR10512406	Enteritidis
SRR10512468	Telelkebir
SRR10512728	Javiana
SRR10513217	I 4:i:-
SRR10513288	Enteritidis
SRR10513611	I 4:i:-
SRR10513674	Enteritidis
SRR10513675	Enteritidis
SRR10513680	Enteritidis
SRR10513728	Enteritidis
SRR10523772	Thompson
SRR10526194	Typhimurium
SRR10526369	Enteritidis
SRR10527125	Enteritidis
SRR10527841	Enteritidis
SRR10530288	Dublin
SRR10532650	Braenderup
SRR10532657	Enteritidis
SRR10532991	Typhimurium
SRR10533028	Enteritidis
SRR10533081	Enteritidis
SRR10533085	Enteritidis
SRR10533087	Enteritidis
SRR10533250	Enteritidis
SRR10541542	I 4:i:-
SRR10541946	Saintpaul
SRR10541947	Saintpaul
SRR10542493	Saintpaul
SRR10542696	Paratyphi B var. L(+) tartrate+
SRR10543670	Paratyphi B var. L(+) tartrate+
SRR10543677	Enteritidis
SRR10543679	Thompson
SRR10543680	Thompson
SRR10543684	Thompson
SRR10543685	Enteritidis
SRR10543686	Thompson
SRR10543688	Paratyphi B var. L(+) tartrate+
SRR10543694	Thompson
SRR10544004	I 4:i:-
SRR10559543	Saintpaul
SRR10559547	Saintpaul
SRR10569365	Enteritidis
SRR10570851	Enteritidis
SRR10570936	Typhimurium
SRR10570941	Enteritidis
SRR10570961	Enteritidis
SRR10570968	Heidelberg
SRR10570969	Heidelberg
SRR10570971	Enteritidis
SRR10570974	Newport
SRR10570987	Enteritidis
SRR10571577	Saintpaul
SRR10571790	Paratyphi B var. L(+) tartrate+
SRR10572074	Enteritidis
SRR10572719	Enteritidis
SRR10572747	Enteritidis
SRR10577716	Braenderup
SRR10577731	Oranienburg
SRR10578030	Typhimurium
SRR10578467	Saintpaul
SRR10578469	Typhimurium
SRR10579174	Thompson
SRR10579227	Saintpaul
SRR10579232	Heidelberg
SRR10579725	Typhimurium
SRR10579765	Enteritidis
SRR10579768	Typhimurium
SRR10582784	Heidelberg
SRR10584153	Typhimurium
SRR10585479	Saintpaul
SRR10585483	Javiana
SRR10593909	Enteritidis
SRR10594004	Braenderup
SRR10595862	Enteritidis
SRR10595867	Braenderup
SRR10596291	Enteritidis
SRR10598349	Typhimurium
SRR10600370	Saintpaul
SRR10600377	Saintpaul
SRR10600378	Saintpaul
SRR10600380	Saintpaul
SRR10600384	Saintpaul
SRR10600401	Saintpaul
SRR10600953	Enteritidis
SRR10604312	Saintpaul
SRR10604622	Enteritidis
SRR10604632	Saintpaul
SRR10604634	Saintpaul
SRR10607619	Javiana
SRR10607620	Javiana
SRR10607621	Javiana
SRR10607622	Javiana
SRR10607623	Javiana
SRR10607624	Javiana
SRR10607625	Javiana
SRR10607626	Javiana
SRR10607627	Javiana
SRR10607628	Javiana
SRR10607636	Hadar
SRR10607651	Heidelberg
SRR10608168	Guinea
SRR10608173	Hadar
SRR10608841	Saintpaul
SRR10608849	Saintpaul
SRR10608952	Enteritidis
SRR10608958	Enteritidis
SRR10609378	Saintpaul
SRR10609652	Typhimurium
SRR10609671	Braenderup
SRR10609675	Braenderup
SRR10609676	Saintpaul
SRR10609677	Braenderup
SRR10609678	Saintpaul
SRR10609683	Saintpaul
SRR10609691	Saintpaul
SRR10609692	Saintpaul
SRR10609695	Saintpaul
SRR10609696	Saintpaul
SRR10609698	Saintpaul
SRR10610655	Javiana
SRR10612033	Typhimurium
SRR10612184	Paratyphi B var. L(+) tartrate+
SRR10615311	Braenderup
SRR10615597	Braenderup
SRR10615599	Saintpaul
SRR10615735	Telelkebir
SRR10615851	Saintpaul
SRR10615857	Saintpaul
SRR10615875	Saintpaul
SRR10615887	Enteritidis
SRR10615940	Telelkebir
SRR10615948	Braenderup
SRR10615950	Saintpaul
SRR10615951	Braenderup
SRR10615952	Poona
SRR10615968	Saintpaul
SRR10615969	Saintpaul
SRR10616137	Braenderup
SRR10616138	Saintpaul
SRR10616141	Saintpaul
SRR10616143	Braenderup
SRR10616144	Saintpaul
SRR10616164	Typhimurium
SRR10616204	Saintpaul
SRR10616222	Bovismorbificans
SRR10617692	Enteritidis
SRR10617803	Enteritidis
SRR10617811	Saintpaul
SRR10618725	Saintpaul
SRR10618966	Enteritidis
SRR10619004	Indiana
SRR10619006	Infantis
SRR10619021	Infantis
SRR10619054	Infantis
SRR10619125	Javiana
SRR10619128	I 4:i:-
SRR10619130	Enteritidis
SRR10619136	Enteritidis
SRR10619307	Braenderup
SRR10619375	Enteritidis
SRR10619386	Thompson
SRR10619392	Thompson
SRR10619868	Newport
SRR10619873	Enteritidis
SRR10619888	Newport
SRR10641203	I 4:i:-
SRR10641208	Typhimurium
SRR10663535	Enteritidis
SRR10663536	Enteritidis
SRR10663858	Enteritidis
SRR10663876	Enteritidis
SRR10663878	Enteritidis
SRR10663934	Enteritidis
SRR10663956	Enteritidis
SRR10663957	Enteritidis
SRR10664000	Enteritidis
SRR10664001	Enteritidis
SRR10664003	Enteritidis
SRR10664009	Enteritidis
SRR10664015	Enteritidis
SRR10664017	Enteritidis
SRR10664019	Enteritidis
SRR10664022	Enteritidis
SRR10664024	Enteritidis
SRR10664028	Enteritidis
SRR10664051	Enteritidis
SRR10664054	Enteritidis
SRR10664094	Enteritidis
SRR10664108	Enteritidis
SRR10664276	Heidelberg
SRR10664370	Reading
SRR10665692	Saintpaul
SRR10665693	Saintpaul
SRR10665696	Enteritidis
SRR10665703	Saintpaul
SRR10665704	Paratyphi B var. L(+) tartrate+
SRR10665705	Saintpaul
SRR10666311	Saintpaul
SRR10666315	Saintpaul
SRR10666358	Javiana
SRR10666359	Braenderup
SRR10666361	Saintpaul
SRR10666366	Saintpaul
SRR10666946	Typhimurium
SRR10667038	Saintpaul
SRR10674437	Saintpaul
SRR10674438	Saintpaul
SRR10674441	Saintpaul
SRR10674442	Saintpaul
SRR10674446	Saintpaul
SRR10674486	Enteritidis
SRR10674764	Braenderup
SRR10674828	Berta
SRR10674849	Enteritidis
SRR10675147	Javiana
SRR10675203	Newport
SRR10675206	Javiana
SRR10675211	Enteritidis
SRR10676635	Braenderup
SRR10685453	Enteritidis
SRR10686681	Braenderup
SRR10686682	Enteritidis
SRR10688164	Enteritidis
SRR10688290	Oslo
SRR10688309	Muenster
SRR10688324	Ohio
SRR10689279	Enteritidis
SRR10689453	Saintpaul
SRR10689495	Pomona
SRR10690366	Enteritidis
SRR10690371	Enteritidis
SRR10691098	Thompson
SRR10691104	Typhimurium
SRR10691124	Enteritidis
SRR10691142	Enteritidis
SRR10695779	Javiana
SRR10695837	Javiana
SRR10695840	Javiana
SRR10695841	Javiana
SRR10695871	Javiana
SRR10696292	Saintpaul
SRR10696294	Saintpaul
SRR10696296	Saintpaul
SRR10696534	Javiana
SRR10696538	Saintpaul
SRR10696543	Typhimurium
SRR10696544	Enteritidis
SRR10698321	Javiana
SRR10698326	Javiana
SRR10715485	Javiana
SRR10716723	Muenster
SRR10716726	Enteritidis
SRR10716751	Enteritidis
SRR10716752	Enteritidis
SRR10717567	Javiana
SRR10717570	Javiana
SRR10717581	Javiana
SRR10717583	Javiana
SRR10717586	Javiana
SRR10717588	Javiana
SRR10717596	Javiana
SRR10717604	Enteritidis
SRR10717608	Typhimurium
SRR10717935	Javiana
SRR10717936	Javiana
SRR10717937	Javiana
SRR10718115	Javiana
SRR10718118	Javiana
SRR10718191	Javiana
SRR10718192	Javiana
SRR10718206	Javiana
SRR10718218	Javiana
SRR10718266	Javiana
SRR10718283	Javiana
SRR10718284	Javiana
SRR10718285	Javiana
SRR10718327	Javiana
SRR10718329	Enteritidis
SRR10718341	Enteritidis
SRR10718345	Typhimurium
SRR10718346	Javiana
SRR10718349	Javiana
SRR10718352	Enteritidis
SRR10718353	Javiana
SRR10718354	Javiana
SRR10718355	Javiana
SRR10718390	Javiana
SRR10718391	Javiana
SRR10718400	Javiana
SRR10718402	Javiana
SRR10718405	Javiana
SRR10719881	Enteritidis
SRR10721939	Javiana
SRR10722104	Braenderup
SRR10723147	Saintpaul
SRR10723190	Javiana
SRR10723196	Typhimurium
SRR10724613	Braenderup
SRR10725545	I 4:i:-
SRR10725958	Javiana
SRR10725959	Thompson
SRR10725963	Enteritidis
SRR10728391	Poona
SRR10728965	Braenderup
SRR10728967	Braenderup
SRR10728970	Enteritidis
SRR10728981	Enteritidis
SRR10729007	Javiana
SRR10736392	Enteritidis
SRR10737972	Braenderup
SRR10737976	Braenderup
SRR10737980	Braenderup
SRR10737981	Anatum
SRR10737988	Braenderup
SRR10737990	Braenderup
SRR10737997	Braenderup
SRR10738001	Agona
SRR10738019	Saintpaul
SRR10738022	Javiana
SRR10738024	Javiana
SRR10738080	Javiana
SRR10738081	Javiana
SRR10738082	Javiana
SRR10738087	Javiana
SRR10738090	Javiana
SRR10738091	Javiana
SRR10738092	Javiana
SRR10738117	Javiana
SRR10738118	Javiana
SRR10738119	Javiana
SRR10739372	Braenderup
SRR10742421	Newport
SRR10744242	Javiana
SRR10744245	Javiana
SRR10744248	Javiana
SRR10744249	Javiana
SRR10744441	Javiana
SRR10744442	Javiana
SRR10744445	Javiana
SRR10744446	Javiana
SRR10744687	Braenderup
SRR10746148	Javiana
SRR10746150	Javiana
SRR10746153	Javiana
SRR10746156	Javiana
SRR10746157	Javiana
SRR10746158	Javiana
SRR10746159	Javiana
SRR10746160	Javiana
SRR10746165	Javiana
SRR10746167	Javiana
SRR10746171	Javiana
SRR10746181	Enteritidis
SRR10746192	Saintpaul
SRR10746207	Braenderup
SRR10747898	Braenderup
SRR10748629	Telelkebir
SRR10748834	Braenderup
SRR10749981	Saintpaul
SRR10749983	Braenderup
SRR10758705	Braenderup
SRR10758709	Telelkebir
SRR10758790	Braenderup
SRR10758791	Saintpaul
SRR10759004	Saintpaul
SRR10760875	Thompson
SRR10761662	Enteritidis
SRR10762403	Enteritidis
SRR10763004	Braenderup
SRR10763014	I 4:i:-
SRR10763290	Braenderup
SRR10763329	Javiana
SRR10763622	Saintpaul
SRR10763623	Saintpaul
SRR10763699	Typhimurium
SRR10764085	I 4:i:-
SRR10764385	Enteritidis
SRR10767242	Saintpaul
SRR10768479	Braenderup
SRR10769038	Enteritidis
SRR10769125	Saintpaul
SRR10769126	Telelkebir
SRR10769133	Saintpaul
SRR10771110	Javiana
SRR10771116	Javiana
SRR10771118	Javiana
SRR10771119	Javiana
SRR10771121	Javiana
SRR10771122	Javiana
SRR10771129	Javiana
SRR10771132	Javiana
SRR10771222	Braenderup
SRR10771517	Braenderup
SRR10771549	Typhimurium
SRR10771553	Saintpaul
SRR10771589	Braenderup
SRR10771596	Typhimurium
SRR10771597	Typhimurium
SRR10771600	Typhimurium
SRR10776687	Javiana
SRR10776728	Typhimurium
SRR10777192	Javiana
SRR10798734	Typhimurium
SRR10798762	Typhimurium
SRR10805105	Braenderup
SRR10805200	Thompson
SRR10806293	Braenderup
SRR10806295	Javiana
SRR10806296	Javiana
SRR10806298	Telelkebir
SRR10806306	Javiana
SRR10806308	Javiana
SRR10806309	Javiana
SRR10806318	Javiana
SRR10806319	Saintpaul
SRR10806677	I 4:i:-
SRR10806679	Braenderup
SRR10806690	Enteritidis
SRR10806838	Saintpaul
SRR10809619	Enteritidis
SRR10809620	Enteritidis
SRR10810148	Javiana
SRR10810149	Javiana
SRR10810151	Javiana
SRR10810153	Javiana
SRR10810154	Javiana
SRR10810156	Javiana
SRR10810255	Javiana
SRR10810256	Javiana
SRR10810260	Braenderup
SRR10810815	Javiana
SRR10814050	Thompson
SRR10814051	Thompson
SRR10814055	Thompson
SRR10814116	Thompson
SRR10814117	Thompson
SRR10814118	Thompson
SRR10814680	I 4:i:-
SRR10814684	Newport
SRR10815008	Typhimurium
SRR10815181	Javiana
SRR10820139	Typhimurium
SRR10820441	Saintpaul
SRR10820639	Oranienburg
SRR10820705	Enteritidis
SRR10822350	Pomona
SRR10822407	Saintpaul
SRR10822515	Javiana
SRR10822517	Javiana
SRR10822519	Javiana
SRR10822520	Javiana
SRR10822523	Javiana
SRR10822525	Javiana
SRR10822528	Javiana
SRR10822529	Javiana
SRR10822530	Javiana
SRR10822531	Javiana
SRR10822762	Javiana
SRR10822768	Javiana
SRR10822776	Javiana
SRR10822916	Javiana
SRR10824170	Guinea
SRR10830780	Javiana
SRR10830788	Javiana
SRR10832161	Javiana
SRR10834036	Heidelberg
SRR10834038	Enteritidis
SRR10834196	Enteritidis
SRR10835629	Javiana
SRR10836992	Ohio
SRR10841545	Heidelberg
SRR10842354	Newport
SRR10842372	Newport
SRR10842394	Newport
SRR10842816	Enteritidis
SRR10842817	Enteritidis
SRR10842818	Enteritidis
SRR10842833	Enteritidis
SRR10842834	Enteritidis
SRR10843385	Newport
SRR10843401	Newport
SRR10843542	Heidelberg
SRR10843555	Telelkebir
SRR10843702	Enteritidis
SRR10843716	I 4:i:-
SRR10843744	Thompson
SRR10843769	Newport
SRR10843771	Typhimurium
SRR10843783	Newport
SRR10843788	Newport
SRR10845407	Enteritidis
SRR10845408	Enteritidis
SRR10847730	Newport
SRR10847794	Newport
SRR10849584	Infantis
SRR10849669	Enteritidis
SRR10849678	Braenderup
SRR10849719	Indiana
SRR10849723	Hadar
SRR10849734	Infantis
SRR10849802	Newport
SRR10850353	Braenderup
SRR10850369	Heidelberg
SRR10850372	Saintpaul
SRR10850373	Typhimurium
SRR10851451	Saintpaul
SRR10851452	Saintpaul
SRR10851459	Saintpaul
SRR10851853	Braenderup
SRR10851865	Javiana
SRR10851897	Javiana
SRR10852012	Javiana
SRR10852213	Heidelberg
SRR10852229	Heidelberg
SRR10853127	Enteritidis
SRR10855674	Muenchen
SRR10855676	Muenchen
SRR10856635	Javiana
SRR10857077	Enteritidis
SRR10857346	Javiana
SRR10857350	Javiana
SRR10857505	Enteritidis
SRR10858651	Saintpaul
SRR10858673	Typhimurium
SRR10859476	Typhimurium
SRR10867894	Indiana
SRR10868598	Enteritidis
SRR10868960	Norwich
SRR10870388	Enteritidis
SRR10870391	Enteritidis
SRR10870395	I 4:i:-
SRR10870396	Agona
SRR10870937	Enteritidis
SRR10870939	Saintpaul
SRR10870950	Saintpaul
SRR10871238	Infantis
SRR10871306	I 4:i:-
SRR10871319	Braenderup
SRR10871325	Indiana
SRR10871330	Javiana
SRR10871337	Muenchen
SRR10873162	Heidelberg
SRR10876065	Enteritidis
SRR10876074	Javiana
SRR10876077	Javiana
SRR10877321	Javiana
SRR10881621	Typhimurium
SRR10881634	I 4:i:-
SRR10881645	Newport
SRR10881648	Javiana
SRR10881946	Javiana
SRR10881949	Infantis
SRR10882132	Oranienburg
SRR10882166	Newport
SRR10882184	Newport
SRR10883321	Javiana
SRR10883323	Javiana
SRR10883324	Saintpaul
SRR10885219	Telelkebir
SRR10887320	Saintpaul
SRR10888002	Typhimurium
SRR10888197	Newport
SRR10897152	Pomona
SRR10897167	Typhimurium
SRR10897175	Litchfield
SRR10897341	Thompson
SRR10897584	Newport
SRR10899887	Braenderup
SRR10900540	Enteritidis
SRR10900543	Enteritidis
SRR10902816	Enteritidis
SRR10902836	Enteritidis
SRR10902837	Saintpaul
SRR10902840	Enteritidis
SRR10902892	Braenderup
SRR10902893	Javiana
SRR10902924	Newport
SRR10903076	Javiana
SRR10903082	Javiana
SRR10903087	Saintpaul
SRR10903291	Javiana
SRR10904004	Newport
SRR10904399	Newport
SRR10904509	Newport
SRR10904827	Newport
SRR10904835	Enteritidis
SRR10904955	Newport
SRR10904956	Newport
SRR10904990	Enteritidis
SRR10907131	Infantis
SRR10907162	Infantis
SRR10907167	Agbeni
SRR10909427	Newport
SRR10910725	Heidelberg
SRR10912204	Newport
SRR10912346	Enteritidis
SRR10918654	Newport
SRR10919016	Enteritidis
SRR10919017	Enteritidis
SRR10919329	Enteritidis
SRR10948804	Heidelberg
SRR10949209	Newport
SRR10949217	Newport
SRR10951135	Javiana
SRR10951138	Javiana
SRR10951142	Javiana
SRR10951159	Javiana
SRR10951160	Javiana
SRR10951188	Javiana
SRR10951292	Typhimurium
SRR10951293	Typhimurium
SRR10951294	Enteritidis
SRR10951756	Newport
SRR10951759	Newport
SRR10953155	Saintpaul
SRR10958398	Typhimurium
SRR10958403	Heidelberg
SRR10958497	Heidelberg
SRR10958506	Saintpaul
SRR10960765	Enteritidis
SRR10960888	Enteritidis
SRR10960971	Javiana
SRR10961513	Muenchen
SRR10961638	Javiana
SRR10962414	Heidelberg
SRR10963118	Saintpaul
SRR10963124	Typhimurium
SRR10966832	Thompson
SRR10970307	Enteritidis
SRR10970340	Typhimurium
SRR10970402	Javiana
SRR10970410	Javiana
SRR10970426	Guinea
SRR10970427	Javiana
SRR10971205	Heidelberg
SRR10971208	Saintpaul
SRR10971422	Javiana
SRR10971450	Norwich
SRR10971747	Infantis
SRR10971778	Infantis
SRR10971936	Mbandaka
SRR10973894	Heidelberg
SRR10973925	Typhimurium
SRR10977075	Infantis
SRR10980072	Heidelberg
SRR10980097	Javiana
SRR10980651	Hadar
SRR10981142	Enteritidis
SRR10981308	Enteritidis
SRR10981822	Newport
SRR10981834	Newport
SRR10984847	Typhimurium
SRR10985075	Typhimurium
SRR10985077	Newport
SRR10985087	Newport
SRR10985350	Coeln
SRR10991621	Agbeni
SRR10992532	Saintpaul
SRR10993306	Enteritidis
SRR10993348	Enteritidis
SRR10993468	Enteritidis
SRR10993494	Javiana
SRR10993501	Newport
SRR10993576	Thompson
SRR10993642	Enteritidis
SRR10993657	Berta
SRR10993840	Javiana
SRR10993843	Javiana
SRR10993845	Javiana
SRR10993846	Javiana
SRR10993849	Javiana
SRR10994523	Typhimurium
SRR10996952	Javiana
SRR10997587	Newport
SRR10997590	Newport
SRR11004148	Enteritidis
SRR11004151	Typhimurium
SRR11004694	Enteritidis
SRR11005186	Enteritidis
SRR11005957	Heidelberg
SRR11006153	Enteritidis
SRR11006163	Saintpaul
SRR11007795	Javiana
SRR11008249	Enteritidis
SRR11008253	Enteritidis
SRR11008944	Anatum
SRR11015370	Heidelberg
SRR11015810	Heidelberg
SRR11016323	Enteritidis
SRR11016696	Newport
SRR11016698	Newport
SRR11020450	Newport
SRR11020454	Newport
SRR11024545	Enteritidis
SRR11024932	Enteritidis
SRR11025184	Coeln
SRR11032576	Enteritidis
SRR11032584	Thompson
SRR11032586	Bovismorbificans
SRR11032621	Enteritidis
SRR11032626	Bovismorbificans
SRR11032635	Typhimurium
SRR11032644	Typhimurium
SRR11032646	Agbeni
SRR11032653	Infantis
SRR11032764	Enteritidis
SRR11032778	Enteritidis
SRR11032787	Newport
SRR11032795	Infantis
SRR11032799	Newport
SRR11032800	Infantis
SRR11032802	Infantis
SRR11032805	Infantis
SRR11032818	Infantis
SRR11033269	Typhimurium
SRR11033285	Coeln
SRR11033286	Javiana
SRR11033871	Enteritidis
SRR11033872	Enteritidis
SRR11039706	Coeln
SRR11041267	Reading
SRR11041268	Newport
SRR11041624	Heidelberg
SRR11043388	Saintpaul
SRR11048528	Heidelberg
SRR11051798	Enteritidis
SRR11058605	Heidelberg
SRR11068192	Typhimurium
SRR11068199	Typhimurium
SRR11072052	Typhimurium
SRR11075260	Saintpaul
SRR11075264	Agona
SRR11077537	Heidelberg
SRR11079899	Muenster
SRR11080576	Heidelberg
SRR11087851	Needs further review
SRR11089935	Enteritidis
SRR11096722	Heidelberg
SRR11097005	Heidelberg
SRR11098889	Enteritidis
SRR11100750	Enteritidis
SRR11100752	Enteritidis
SRR11101192	Stanley
SRR11103611	Coeln
SRR11113051	Enteritidis
SRR11113054	Enteritidis
SRR11113055	Enteritidis
SRR11113114	Typhimurium
SRR11113118	Typhimurium
[truncated: 31,760 more rows]
