# Supplementary material for: In silico development of a cross-protective, multiepitope Salmonella vaccine against clinically- relevant and poultry-associated serovars
Source: Research Square preprint supplement (doi:10.21203/rs.3.rs-7705248/v1), 2025-12-02
Supplement: Supplementary file 4 [file cba03dcdf7ea0db346ab1676.xlsx]

## Sheet: ST 1 - Tools Used
Supplementary Table 1: Reverse vaccinology tools used by Phase
Phase	Tool	Purpose(s)	Website	Citation
Phase I: Subtractive Proteomics	Vaxign2	Wrapper Program for Protein Filtering	https://violinet.org/vaxign2	Ong et al. (2022)
	Vaxign-ML	Protein Antigenicity Prediction	https://violinet.org/vaxign2	Ong et al. (2020)
	PSORTb (v.3.0)	Subcellular Localization	https://violinet.org/vaxign2 https://www.psort.org/psortb/	Yu et al (2010)
	SPAAN	Adhesion Probability	https://violinet.org/vaxign2	Sachdeva et al. (2005)
	TMHMM(v.2.0)	Transmembrane Helix Prediction	https://violinet.org/vaxign2 https://services.healthtech.dtu.dk/services/TMHMM-2.0/	Krogh et al. (2001)
	BLAST+ (v.2.14.1) BLASTP	Similar Proteins Negative Homology with Hosts Protein Positive Homology with Serovars	https://blast.ncbi.nlm.nih.gov/Blast.cgi?PAGE=Proteins	Camacho et a. (2008) Sayers et al. (2002)
	VaxiJen2	Protein Antigenicity Prediction	http://www.ddg-pharmfac.net/vaxijen/VaxiJen/VaxiJen .html	Dalsass et al. (2019)
Phase II: Epitope Discovery	NetMHCpan (v.4.1)	Cytotoxic T-Cell (CTL) Epitope Prediction	https://services.healthtech.dtu.dk/services/NetMHCpan-4.1/	Jurtz et al. (2017)
	NetMHCIIpan (v.4.0)	Helper T-Cell (Th) Epitope Prediction	https://services.healthtech.dtu.dk/services/NetMHCIIpan-4.0/	Reynisson et al. (2020)
	IEDB Immunogenicty	CTL Immunogenicity Prediction	http://tools.iedb.org/immunogenicity/	Calis et al. (2013)
	VaxiJen2	Epitope Antigenicity Prediction Overlapping Epitope Selection	http://www.ddg-pharmfac.net/vaxijen/VaxiJen/VaxiJen .html	Dalsass et al. (2019)
	ToxinPred	Epitope Toxicity Prediction Grand Average of Hydropathy Score	https://webs.iiitd.edu.in/raghava/toxinpred/	Gupta et al. (2013)
	BLAST+ (v.2.14.1) BLASTP	Epitope Positive Homology with Serovars	https://blast.ncbi.nlm.nih.gov/Blast.cgi?PAGE=Proteins	Camacho et a. (2008) Sayers et al. (2002)
	BepiPred (v.3.0)	Linear B-Cell Epitope Prediction	https://services.healthtech.dtu.dk/services/BepiPred-3.0/	Clifford et al. (2022)
Phase IV: Construct Evaluation	VaxiJen2	MEVC Antigenicity Prediction	http://www.ddg-pharmfac.net/vaxijen/VaxiJen/VaxiJen .html	Dalsass et al. (2019)
	AllergenFP	Allergenicity Prediction	https://ddg-pharmfac.net/AllergenFP/	Dimitrov et al. (2014)
	SOLpro	Solubility Prediction	http://scratch.proteomics.ics.uci.edu/	SOLpro - Magnan et al. (2009) SCRATCH - Cheng et al. (2005)
	ToxinPred2	Toxicity Prediction	https://webs.iiitd.edu.in/raghava/toxinpred2/	Sharma et al. (2022)
	ExPASy-ProtParam	Physiochemical Properties	https://web.expasy.org/protparam/	Gasteiger et al. (2005)
	PRSIPRED	Secondary Structure Prediction	http://bioinf.cs.ucl.ac.uk/psipred/	Jones (1999)
	Phyre2	Tertiary Structure Prediction	http://www.sbg.bio.ic.ac.uk/~phyre2/html/page.cgi?id=index	Kelley et al. (2015)
	ChimeraX	Tertiary Structure Visualization	https://www.rbvi.ucsf.edu/chimerax/	Meng et al. (2023)
	GalaxyRefine	Tertiary Structure Refinement	https://galaxy.seoklab.org/cgi-bin/submit.cgi?type=REFINE	Heo et al. (2013)
	ERRAT	Tertiary Structure Validation	https://saves.mbi.ucla.edu/	Colovos & Yeates (1993)
	VERIFY3D	Tertiary Structure Validation	https://saves.mbi.ucla.edu/	Eisenberg et al. (1997)
	PROCHECK	Tertiary Structure Validation	https://saves.mbi.ucla.edu/	Laskowski et al. (1993)
	ProSA-web	Tertiary Structure Validation	https://prosa.services.came.sbg.ac.at/prosa.php	Wiederstein & Sippl (2007)
	ClusPro	Molecular Docking Simulation	https://cluspro.bu.edu/home.php	Kozakov et al. (2013)
	PDBsum	Receptor-Ligand Interactions	https://www.ebi.ac.uk/thornton-srv/databases/pdbsum/	Laskowski et al. (2018)
	GROMACS (v. 2023.3)	Molecular Dynamics Simulation Analysis	https://www.gromacs.org	Abraham et al. (2015)
	JCat	Codon Optimization	https://www.jcat.de/	Grote et al. (2005)
	gBlocks™ Gene Fragments Entry Tool	Nucleotide Sequence Complexity	https://www.idtdna.com/SciTools	Owczarzy et al. (2008)
	Codon Optimization Tool	Codon Optimization Nucleotide Sequence Complexity	https://www.idtdna.com/SciTools	Owczarzy et al. (2008)
	Genious Prime (v. 2023.2.1)	In Silico Cloning	https://www.geneious.com	N/A
	C-ImmSim	C-ImmSim	https://kraken.iac.rm.cnr.it/C-IMMSIM/	Rapin et al. (2010)
MEVC is multiepitope vaccine construct.

## Sheet: ST 2 - Protein Results
Supplementary Table 2: Metadata of 101 Salmonella enterica subspecies enterica serovar Typhimurium strain UK-1 proteins post Phase I Subtractive Proteomics
GenBank Accession	Vaxign ML Antigenicity Score	Localization Probability	Localization	Adhesin Probability	No. of Transmembrane Helices	VaxiJen Antigenicity Score	Annotated Protein Name	GenBank Protein Name	GenBank Protein Description	Similar Salmonella Proteins Descriptions	Similar Salmonella Protein Names	RefSeq Accession	RefSeq Protein Description	Gene Ontology Terms*	Gene Ontology Functions*	Epitopic^	Construct#
AEF08065.1	95.1	0.96	Extracellular	0.854	0	0.6591	FALSE	-	putative outer membrane lipoprotein	MULTISPECIES: putative fimbrial-like adhesin protein putative fimbrial-like adhesin protein StcD, partial adhesin membrane protein outer membrane lipoprotein putative fimbrial-like adhesin protein, partial	-	WP_000765279.1	MULTISPECIES: putative fimbrial-like adhesin protein [Salmonella]	-	-	FALSE	FALSE
AEF06269.1	95.4	1	Outer Membrane	0.717	0	0.5581	FALSE	-	putative fimbrial usher	MULTISPECIES: fimbrial outer membrane usher protein fimbrial outer membrane usher protein fimbrial assembly protein fimbrial outer membrane usher protein, partial	-	WP_000075343.1	MULTISPECIES: fimbrial outer membrane usher protein [Salmonella]	-	-	TRUE	FALSE
AEF07006.1	92.6	1	Outer Membrane	0.565	0	0.7383	FALSE	-	putative outer membrane protein	MULTISPECIES: oligogalacturonate-specific porin KdgM family protein hypothetical protein oligogalacturonate-specific porin KdgM family protein hypothetical protein ELZ87_14050 hypothetical protein ELZ70_13950 oligogalacturonate-specific porin KdgM family protein, partial hypothetical protein E8N23_14175	-	WP_000700610.1	MULTISPECIES: oligogalacturonate-specific porin KdgM family protein [Salmonella]	-	-	FALSE	FALSE
AEF07198.1	93.7	0.95	Outer Membrane	0.629	1	0.7168	FALSE	-	putative outer membrane protein	MULTISPECIES: YdiY family protein DUF481 domain-containing protein hypothetical protein YdiY family protein hypothetical protein DPF89_02015 hypothetical protein AGQ53_17925 membrane protein outer membrane protein YdiY family protein, partial	-	WP_000770981.1	MULTISPECIES: YdiY family protein [Salmonella]	-	-	TRUE	FALSE
AEF08066.1	99.6	1	Outer Membrane	0.724	0	0.5818	FALSE	-	putative outer membrane protein	fimbrial biogenesis outer membrane usher protein MULTISPECIES: fimbrial biogenesis outer membrane usher protein fimbria/pilus outer membrane usher protein fimbrial biogenesis outer membrane usher protein, partial fimbrial assembly protein fimbrial outer membrane usher protein fimbrial outer membrane usher protein, partial fimbrial usher protein putative outer membrane usher protein	-	WP_000945364.1	MULTISPECIES: fimbrial biogenesis outer membrane usher protein [Salmonella]	-	-	FALSE	FALSE
AEF10361.1	99.1	1	Outer Membrane	0.627	0	0.5341	FALSE	-	putative fimbrial usher protein	MULTISPECIES: fimbrial biogenesis outer membrane usher protein fimbrial biogenesis outer membrane usher protein fimbrial biogenesis usher protein	-	WP_000876250.1	MULTISPECIES: fimbrial biogenesis outer membrane usher protein [Salmonella]	-	-	TRUE	FALSE
AEF10382.1	96.8	1	Outer Membrane	0.705	0	0.6716	FALSE	-	putative fimbrial usher protein	MULTISPECIES: fimbrial outer membrane usher protein fimbrial outer membrane usher protein fimbrial biogenesis outer membrane usher protein fimbrial assembly protein	-	WP_001160706.1	MULTISPECIES: fimbrial outer membrane usher protein [Salmonella]	-	-	TRUE	FALSE
AEF07365.1	90.9	0.98	Periplasmic	0.574	0	0.668	FALSE	-	putative outer membrane protein	MULTISPECIES: DUF1161 domain-containing protein DUF1161 domain-containing protein hypothetical protein C9F10_22805 membrane protein hypothetical protein SEI61121_12021 putative outer membrane protein hypothetical protein SES60163_01796 outer membrane protein hypothetical protein LFZ45_13370 hypothetical protein SESEF3709_02197 hypothetical protein SEEM9284_011695 hypothetical protein CFSAN001077_…	-	WP_000975516.1	MULTISPECIES: DUF1161 domain-containing protein [Salmonella]	-	-	FASLE	FALSE
AEF08431.1	92.5	0.98	Periplasmic	0.573	1	0.5948	FALSE	-	putative inner membrane protein	tetratricopeptide repeat protein YfgM family protein hypothetical protein MULTISPECIES: YfgM family protein putative inner membrane protein hypothetical protein BKP32_22590 conserved hypothetical protein membrane protein Uncharacterized protein conserved in bacteria YfgM family protein, partial hypothetical protein AH87_20035, partial hypothetical protein DSN66_28550, partial putative membrane pr…	-	WP_000409190.1	MULTISPECIES: YfgM family protein [Salmonella]	-	-	TRUE	FALSE
AEF10148.1	95.7	1	Periplasmic	0.612	0	0.5233	FALSE	-	putative arginine-binding periplasmic protein	MULTISPECIES: arginine ABC transporter substrate-binding protein transporter substrate-binding domain-containing protein arginine ABC transporter substrate-binding protein	-	WP_000727896.1	MULTISPECIES: arginine ABC transporter substrate-binding protein [Salmonella]	-	-	FALSE	FALSE
AEF06271.1	94.9	0.97	Extracellular	0.815	0	0.8444	FALSE	-	putative fimbrial major subunit	MULTISPECIES: fimbrial protein type 1 fimbrial protein fimbrial protein fimbrial protein, partial putative fimbrial protein, partial type 1 fimbrial protein, partial	-	WP_000062035.1	MULTISPECIES: fimbrial protein [Salmonella]	-	-	TRUE	FALSE
AEF06900.1	90.9	0.96	Extracellular	0.938	1	0.7894	FALSE	-	hypothetical protein STMUK_0992	MULTISPECIES: hypothetical protein hypothetical protein MULTISPECIES: lipoprotein hypothetical protein, partial hypothetical protein FYL74_25540, partial hypothetical protein SET4581_23569 hypothetical protein B1R81_23420 hypothetical protein FYL76_21090, partial hypothetical protein SE15cs_01094 Gifsy-2 prophage protein hypothetical protein EC19_22750, partial	-	WP_000798705.1	MULTISPECIES: hypothetical protein [Salmonella]	-	-	FALSE	FALSE
AEF10334.1	90.9	0.97	Extracellular	0.816	1	0.5636	FALSE	-	hypothetical protein STMUK_4529	putative secreted protein MULTISPECIES: DUF2501 domain-containing protein DUF2501 domain-containing protein hypothetical protein SEPB56_20649 hypothetical protein Putative glycoprotein/receptor hypothetical protein SEEC0006_23080 Putative glycoprotein/receptor, partial DUF2501 domain-containing protein, partial putative glycoprotein/receptor, partial	-	WP_001090314.1	MULTISPECIES: DUF2501 domain-containing protein [Salmonella]	-	-	FALSE	FALSE
AEF06441.1	95.2	0.95	Outer Membrane	0.816	0	0.7723	FALSE	-	putative outer membrane protein	outer membrane protein, partial MULTISPECIES: porin porin membrane protein	-	WP_000152869.1	MULTISPECIES: porin [Salmonella]	-	-	FALSE	FALSE
AEF06168.1	98.3	0.98	Periplasmic	0.703	1	0.5275	FALSE	-	putative endochitinase	Chitinase chitinase, partial chitinase class I MULTISPECIES: chitinase chitinase endochitinase glycoside hydrolase family 19 protein PKD domain-containing protein	-	WP_000524168.1	MULTISPECIES: chitinase [Salmonella]	-	-	TRUE	FALSE
AEF08173.1	90.9	1	Periplasmic	0.648	0	0.6602	FALSE	-	citrate reductase cytochrome c-type subunit	nitrate reductase cytochrome C550 subunit, partial cytochrome c-type protein NapB precursor Nitrate reductase cytochrome c550-type subunit MULTISPECIES: nitrate reductase cytochrome c-type subunit nitrate reductase cytochrome c-type subunit citrate reductase cytochrome c-type subunit hypothetical protein SARI_00634 nitrate reductase periplasmic nitrate reductase electron transfer subunit nitrate …	-	WP_000835182.1	MULTISPECIES: nitrate reductase cytochrome c-type subunit [Salmonella]	-	-	FALSE	FALSE
AEF08915.1	97.7	0.98	Periplasmic	0.664	0	0.6665	FALSE	-	hypothetical protein STMUK_3053	MULTISPECIES: oxidative stress defense protein oxidative stress defense protein oxidative stress defense protein, partial	-	WP_000669854.1	MULTISPECIES: oxidative stress defense protein [Salmonella]	-	-	TRUE	FALSE
AEF05955.1	93.3	1	Extracellular	0.932	0	0.7624	TRUE	-	fimbrial subunit	MULTISPECIES: fimbrial protein BcfA fimbrial protein BcfA fimbrial protein fimbrial protein BcfA, partial type-1 fimbrial major subunit fimbrial subunit fimbrial protein, partial fimbrial chaperone	BcfA	WP_000743357.1	MULTISPECIES: fimbrial protein BcfA [Salmonella]	-	-	FALSE	FALSE
AEF06475.1	94.6	1	Extracellular	0.914	0	0.7215	TRUE	-	fimbrin	MULTISPECIES: type 1 fimbrial protein subunit FimA type 1 fimbrial protein subunit FimA Fimbriae-like adhesin SfmA type-1 fimbrial protein subunit A FimA, partial FimA major type 1 subunit fimbrin (pilin)	FimA, SfmA	WP_000681030.1	MULTISPECIES: type 1 fimbrial protein subunit FimA [Salmonella]	-	-	TRUE	FALSE
AEF07017.1	90.9	0.97	Extracellular	0.749	0	0.6452	TRUE	-	curlin minor subunit	MULTISPECIES: curli minor subunit CsgB curlin minor subunit CsgB curlin curli minor subunit CsgB nucleation component of curlin monomers Minor curlin subunit CsgB curlin minor subunit Minor curlin subunit curli minor subunit CsgB, partial curlin, partial curlin minor subunit CsgB, partial	CsgB	WP_000791655.1	MULTISPECIES: curli minor subunit CsgB [Salmonella]	-	-	FALSE	FALSE
AEF07018.1	90.9	0.97	Extracellular	0.949	0	1.0694	TRUE	-	cryptic curlin major subunit	MULTISPECIES: curli major subunit CsgA curlin major subunit CsgA major curlin subunit CsgA curli major subunit CsgA curlin major curlin subunit AgfA protein, partial curlin, partial Major curlin subunit precursor CsgA, partial curli major subunit CsgA, partial AgfA, partial Major curlin subunit precursor CsgA curlin major subunit CsgA, partial major curlin subunit CsgA, partial SEF17 fimbrin, par…	CsgA	WP_000771416.1	MULTISPECIES: curli major subunit CsgA [Bacteria]	-	-	FALSE	FALSE
AEF06110.1	98.2	0.99	Outer Membrane	0.589	1	0.5943	TRUE	-	putativie fimbrial usher	Fimbriae usher protein StiC fimbrial usher protein fimbrial outer membrane usher protein MULTISPECIES: fimbrial outer membrane usher protein long polar fimbrial outer membrane usher protein fimbrial biogenesis outer membrane usher protein fimbrial assembly protein Outer membrane usher protein fimD precursor fimbrial outer membrane usher protein StiC Outer membrane usher protein FimD Outer membran…	StiC, FimD, AggC	WP_001231776.1	MULTISPECIES: fimbrial outer membrane usher protein [Salmonella]	-	-	FALSE	FALSE
AEF06233.1	95.1	1	Outer Membrane	0.718	0	0.6368	TRUE	-	putative fimbrial usher	fimbrial biogenesis outer membrane usher protein pilin outer membrane usher protein SafC MULTISPECIES: fimbrial biogenesis outer membrane usher protein salmonella atypical fimbria outer membrane usher (SafC)	SafC	WP_000669634.1	MULTISPECIES: fimbrial biogenesis outer membrane usher protein [Salmonella]	-	-	FALSE	FALSE
AEF06253.1	98.4	1	Outer Membrane	0.663	0	0.7654	TRUE	-	outer membrane phosphoporin protein E	outer membrane phosphoporin protein E phosphoporin PhoE MULTISPECIES: phosphoporin PhoE Outer membrane porin protein NmpC precursor Outer membrane pore protein E phosphoporin PhoE, partial outer membrane protein Outer membrane pore protein E precursor outer membrane pore protein E precursor	PhoE	WP_001043675.1	MULTISPECIES: phosphoporin PhoE [Salmonella]	GO:0034220 GO:0015288 GO:0016020	porin activity|0015288	TRUE	FALSE
AEF06478.1	96.1	1	Outer Membrane	0.606	0	0.541	TRUE	-	outer membrane usher protein precursor	Outer membrane usher protein SfmD MULTISPECIES: fimbrial biogenesis usher protein fimbrial biogenesis outer membrane usher protein fimbrial biogenesis usher protein fimbrial protein fimbrial biogenesis usher protein, partial FimD outer membrane usher protein	SfmD, FimD	WP_000754233.1	MULTISPECIES: fimbrial biogenesis usher protein [Salmonella]	GO:0009297 GO:0005515 GO:0015473 GO:0016020	protein binding|0005515 fimbrial usher porin activity|0015473	TRUE	FALSE
AEF06947.1	96.1	1	Outer Membrane	0.532	0	0.6681	TRUE	-	outer membrane protein A	outer membrane protein A MULTISPECIES: porin OmpA porin OmpA OmpA, partial membrane protein Outer membrane protein A precursor membrane protein, partial hypothetical protein SPAB_02488 Outer membrane protein A outer membrane protein (ompA) outer membrane protein A, partial	OmpA	WP_001674965.1	MULTISPECIES: porin OmpA [Salmonella]	-	-	TRUE	FALSE
AEF07157.1	95.9	1	Outer Membrane	0.584	0	0.6008	TRUE	-	MltA-interacting protein A	MULTISPECIES: MipA/OmpV family protein MipA/OmpV family protein MltA-interacting protein outer membrane protein MltA-interacting protein MipA, partial MltA-interacting protein MipA hypothetical protein SARI_01694	MipA	WP_000163762.1	MULTISPECIES: MipA/OmpV family protein [Salmonella]	-	-	TRUE	FALSE
AEF07339.1	97.7	1	Outer Membrane	0.785	1	0.7621	TRUE	-	outer membrane protein N precursor	porin OmpC MULTISPECIES: porin OmpC OmpN, partial porin porin OmpS2 porin OmpC, partial outer membrane protein porin OmpS2, partial porin, partial	OmpC	WP_000824310.1	porin OmpC [Salmonella enterica]	GO:0034220 GO:0015288	porin activity|0015288	TRUE	FALSE
AEF07397.1	98.7	1	Outer Membrane	0.793	1	0.5203	TRUE	-	putative outer membrane protein	outer membrane protein, partial MULTISPECIES: porin OmpC porin OmpC phosphoporin PhoE porin	OmpC, PhoE	WP_000758335.1	MULTISPECIES: porin OmpC [Salmonella]	GO:0034220 GO:0015288	porin activity|0015288	TRUE	FALSE
AEF07442.1	98.6	1	Outer Membrane	0.823	0	0.6701	TRUE	-	putative outer membrane porin precursor	RecName: Full=Outer membrane porin OmpD; Flags: Precursor outer membrane protein MULTISPECIES: porin OmpD porin OmpD outer membrane porin protein (ompD), partial porin OmpD, partial new outer membrane protein; predicted bacterial porin porin	OmpD	WP_000769035.1	MULTISPECIES: porin OmpD [Salmonella]	-	-	FALSE	FALSE
AEF08307.1	96	1	Outer Membrane	0.85	0	0.5958	TRUE	-	long-chain fatty acid outer membrane transporter	long-chain fatty acid transporter FadL long-chain fatty acid outer membrane transporter long-chain fatty acid transporter long-chain fatty acid transport protein precursor none MULTISPECIES: long-chain fatty acid transporter FadL	FadL		-	-	-	TRUE	FALSE
AEF08779.1	93.8	0.99	Outer Membrane	0.801	0	0.7429	TRUE	NlpD	lipoprotein NlpD	lipoprotein NlpD murein hydrolase activator NlpD lipoprotein RecName: Full=Murein hydrolase activator NlpD; Flags: Precursor	NlpD		-	-	-	FALSE	FALSE
AEF08888.1	91	0.99	Outer Membrane	0.833	0	0.7013	TRUE	-	putative metalloendopeptidase	MULTISPECIES: amidase activator ActS metalloendopeptidase peptidoglycan DD-metalloendopeptidase family protein LysM peptidoglycan-binding domain-containing protein amidase activator ActS endopeptidase possible lipoprotein amidase activator ActS, partial lipoprotein hypothetical protein AWI50_05505 hypothetical protein LFZ91_16915 hypothetical protein BH006_04940 hypothetical protein SEET0819_2216…	ActS, YgeR	WP_000244329.1	MULTISPECIES: amidase activator ActS [Salmonella]	-	-	TRUE	FALSE
AEF09035.1	99.1	1	Outer Membrane	0.796	0	0.5616	TRUE	-	outer membrane channel protein	MULTISPECIES: outer membrane channel protein TolC outer membrane channel protein TolC outer membrane channel protein	TolC	WP_014343899.1	MULTISPECIES: outer membrane channel protein TolC [Salmonella]	GO:0055085 GO:0015562	efflux transmembrane transporter activity|0015562	TRUE	FALSE
AEF09472.1	97.5	1	Outer Membrane	0.618	0	0.6086	TRUE	-	long polar fimbrial outer membrane usher protein	outer membrane usher protein LpfC MULTISPECIES: outer membrane usher protein LpfC fimbrial assembly protein	LpfC	WP_000220312.1	MULTISPECIES: outer membrane usher protein LpfC [Salmonella]	-	-	FALSE	FALSE
AEF09523.1	96.7	0.99	Outer Membrane	0.921	0	0.7976	TRUE	-	putative inner membrane protein	autotransporter adhesin SadA trimeric autotransporter adhesin SadA MULTISPECIES: trimeric autotransporter adhesin SadA MULTISPECIES: ESPR-type extended signal peptide-containing protein autotransporter adhesin SadA, partial	SadA	WP_001079584.1	MULTISPECIES: trimeric autotransporter adhesin SadA [Salmonella]	-	-	TRUE	FALSE
AEF05956.1	90.9	0.98	Periplasmic	0.618	1	0.5117	TRUE	-	fimbrial chaparone	fimbrial chaparone MULTISPECIES: fimbrial biogenesis chaperone BcfB Fimbrial periplasmic chaperone SfmC, partial fimbrial biogenesis chaperone BcfB fimbrial chaperone protein fimbrial chaparone, partial fimbria/pilus periplasmic chaperone hypothetical protein SPAB_00029 Chaperone protein FimC Fimbrial periplasmic chaperone SfmC fimbrial chaperone hypothetical protein LFZ90_16010 chaperone protein…	BcfB, FimC, SfmC	WP_000742551.1	MULTISPECIES: fimbrial biogenesis chaperone BcfB [Salmonella]	-	-	FALSE	FALSE
AEF06111.1	90.9	1	Periplasmic	0.765	0	0.5118	TRUE	-	putative fimbrial chaparone	fimbrial biogenesis chaperone StiB long polar fimbrial chaperone LpfB MULTISPECIES: fimbrial biogenesis chaperone StiB fimbria/pilus periplasmic chaperone Chaperone protein EcpD	StiB, LpfB, EcpD	WP_001086406.1	fimbrial biogenesis chaperone StiB [Salmonella enterica]	-	-	FALSE	FALSE
AEF06668.1	98.5	1	Periplasmic	0.773	0	0.5828	TRUE	TolB	translocation protein TolB	hypothetical protein SPAB_02778 tolB protein precursor MULTISPECIES: Tol-Pal system beta propeller repeat protein TolB Tol-Pal system protein TolB Tol-Pal system beta propeller repeat protein TolB translocation protein TolB Tol-Pal system protein TolB, partial hypothetical protein SARI_02188 translocation protein TolB precursor tol-Pal system beta propeller repeat protein TolB Protein tolB Tol-Pa…	TolB	WP_001562341.1	MULTISPECIES: Tol-Pal system beta propeller repeat protein TolB [Salmonella]	GO:0006810 GO:0005215 GO:0030288	transporter activity|0005215	FALSE	FALSE
AEF06801.1	95.9	1	Periplasmic	0.708	0	0.5695	TRUE	-	arginine transport system component	MULTISPECIES: ABC transporter substrate-binding protein ArtJ arginine ABC transporter substrate-binding protein ABC transporter substrate-binding protein ArtJ ABC transporter substrate-binding protein ArtJ, partial	ArtJ	WP_000737538.1	MULTISPECIES: ABC transporter substrate-binding protein ArtJ [Salmonella]	-	-	TRUE	FALSE
AEF06804.1	95.4	1	Periplasmic	0.776	0	0.5941	TRUE	-	arginine transport system	hypothetical protein SPAB_02598 MULTISPECIES: arginine ABC transporter substrate-binding protein arginine ABC transporter substrate-binding protein arginine ABC transporter periplasmic arginine-binding protein ArtI arginine ABC transporter substrate-binding protein, partial arginine-binding periplasmic protein 1precursor arginine-binding periplasmic protein 1 precursor ABC superfamily (bind_prot)…	ArtI, ArtP	WP_000756586.1	MULTISPECIES: arginine ABC transporter substrate-binding protein [Salmonella]	-	-	FALSE	FALSE
AEF06836.1	91.3	1	Periplasmic	0.631	0	0.65	TRUE	-	outer-membrane lipoprotein carrier protein	outer membrane lipoprotein chaperone LolA outer-membrane lipoprotein carrier protein LolA outer membrane lipoprotein carrier protein precursor outer membrane lipoprotein carrier protein LolA lipoprotein chaperone outer-membrane lipoprotein carrier protein precursor MULTISPECIES: outer membrane lipoprotein chaperone LolA periplasmic protein effects translocation of lipoproteins from inner membrane…	LolA		-	-	-	TRUE	FALSE
AEF07768.1	90.9	1	Periplasmic	0.6	0	0.5079	TRUE	-	high-affinity zinc transporter periplasmic component	zinc ABC transporter substrate-binding protein ZnuA high-affinity zinc transporter periplasmic protein unnamed protein product high-affinity zinc uptake system protein ZnuA precursor High-affinity zinc uptake system protein ZnuA precursor metal ion ABC transporter periplasmic protein zinc uptake system periplasmic binding protein High-affinity zinc uptake system protein ZnuA high-affinity zinc tr…	ZnuA		-	-	-	TRUE	FALSE
AEF08271.1	95.2	1	Periplasmic	0.692	1	0.6194	TRUE	-	lysine/arginine/ornithine transport protein	MULTISPECIES: lysine/arginine/ornithine ABC transporter substrate-binding protein ArgT lysine/arginine/ornithine ABC transporter substrate-binding protein ArgT LAO protein histidine ABC transporter substrate-binding protein HisJ cationic amino acid ABC transporter periplasmic binding protein ABC transporter lysine/arginine/ornithine binding periplasmic protein Lysine-arginine-ornithine-binding pe…	ArgT, HisJ	WP_000754423.1	MULTISPECIES: lysine/arginine/ornithine ABC transporter substrate-binding protein ArgT [Salmonella]	-	-	FASLE	FALSE
AEF09473.1	90.9	1	Periplasmic	0.606	1	0.5983	TRUE	-	long polar fimbrial chaperone precursor	MULTISPECIES: long polar fimbrial biogenesis chaperone LpfB long polar fimbrial biogenesis chaperone LpfB molecular chaperone LpfB long polar fimbrial chaperone LpfB long polar fimbrial biogenesis chaperone LpfB, partial lpfB long polar fimbrial chaperone molecular chaperone LpfB, partial fimbrial chaperone protein FimC, partial fimbrial chaperone protein fimbria/pilus periplasmic chaperone, part…	LpfB, lpfB	WP_001082123.1	MULTISPECIES: long polar fimbrial biogenesis chaperone LpfB [Salmonella]	-	-	FALSE	FALSE
AEF09974.1	90.9	1	Periplasmic	0.8	1	0.6306	TRUE	-	zinc resistance protein	MULTISPECIES: zinc resistance sensor/chaperone ZraP Chain A Zinc resistance-associated protein zinc resistance-associated protein ZraP zinc resistance sensor/chaperone ZraP periplasmic heavy metal sensor zinc resistance protein possible exported protein zinc resistance sensor/chaperone ZraP, partial Zinc resistance-associated protein zinc resistance-associated protein ZraP, partial periplasmic he…	ZraP	WP_000828129.1	MULTISPECIES: zinc resistance sensor/chaperone ZraP [Salmonella]	-	-	TRUE	FALSE
AEF10383.1	90.9	1	Periplasmic	0.577	0	0.6778	TRUE	-	putative fimbrial chaparone	MULTISPECIES: fimbrial biogenesis chaperone SthA fimbrial assembly chaperone fimbrial biogenesis chaperone SthA fimbrial assembly protein putative fimbrial chaperone protein fimbrial biogenesis chaperone SthA, partial	SthA	WP_000680512.1	MULTISPECIES: fimbrial biogenesis chaperone SthA [Salmonella]	-	-	TRUE	FALSE
AEF05959.1	91.4	0.97	Extracellular	0.852	0	0.7016	TRUE	-	fimbrial subunit	MULTISPECIES: fimbrial protein BcfE fimbrial protein BcfE fimbrial protein fimbrial subunit Fimbrial subunit type 1 fimbrae adaptor subunit FimF	BcfE, FimF	WP_001082039.1	MULTISPECIES: fimbrial protein BcfE [Salmonella]	-	-	FALSE	FALSE
AEF05960.1	91.8	1	Extracellular	0.712	0	0.6975	TRUE	-	fimbrial subunit	MULTISPECIES: fimbrial protein BcfF fimbrial protein BcfF fimbrial protein fimbrial protein BcfF, partial	BcfF	WP_001243232.1	MULTISPECIES: fimbrial protein BcfF [Salmonella]	-	-	FALSE	FALSE
AEF06109.1	98.6	0.97	Extracellular	0.817	0	0.8653	TRUE	-	putative fimbrial protein precurosr	fimbrial protein MULTISPECIES: fimbrial protein fimbrial protein StiH Putative fimbriae putative fimbrial protein StiH, partial StiH, partial fimbrial protein, partial hypothetical protein SEN04528_20200	StiH	WP_000794043.1	MULTISPECIES: fimbrial protein [Salmonella]	-	-	FALSE	FALSE
AEF06112.1	92.8	0.97	Extracellular	0.845	0	0.6693	TRUE	-	putative fimbrial subunit	MULTISPECIES: fimbrial protein fimbrial protein fimbrial protein StiA fimbrial protein, partial fimbrial protein StiA, partial	StiA	WP_000777532.1	MULTISPECIES: fimbrial protein [Salmonella]	GO:0007155 GO:0009289	-	FALSE	FALSE
AEF06130.1	96.2	0.97	Extracellular	0.901	0	0.7691	TRUE	-	putative fimbrial subunit	MULTISPECIES: fimbrial major subunit StfA fimbrial major subunit StfA fimbrial protein Fimbria A protein putative fimbrial subunit StfA, partial fimbrial major subunit StfA, partial	StfA	WP_001090554.1	MULTISPECIES: fimbrial major subunit StfA [Salmonella]	-	-	FALSE	FALSE
AEF06208.1	91	0.97	Extracellular	0.523	0	1.0482	TRUE	-	putative cytoplasmic protein	MULTISPECIES: Hcp family type VI secretion system effector Hcp1 family type VI secretion system effector type VI secretion system tube protein Hcp Hcp family type VI secretion system effector Hcp family type VI secretion system effector, partial	Hcp	WP_000119443.1	MULTISPECIES: Hcp family type VI secretion system effector [Salmonella]	-	-	FALSE	FALSE
AEF06917.1	99.4	0.94	Extracellular	0.52	0	0.5623	TRUE	-	minor tail protein	phage tail tape measure protein MULTISPECIES: phage tail tape measure protein gifsy-1 prophage VmtH tail protein prophage tail component protein putative minor tail protein Gifsy-2 prophage probable minor tail protein phage tail protein Tape Measure Phage tail length tape-measure protein 1 Phage tail length tape-measure protein 1, partial	VmtH	WP_010989010.1	MULTISPECIES: phage tail tape measure protein [Salmonella]	GO:0016032 GO:0005198 GO:0044423	structural molecule activity|0005198	FALSE	FALSE
AEF08737.1	97	1	Extracellular	0.597	0	0.6563	TRUE	-	secreted effector protein	MULTISPECIES: SPI-1 type III secretion system effector SipA SPI-1 type III secretion system effector SipA	SipA	WP_000258811.1	MULTISPECIES: SPI-1 type III secretion system effector SipA [Salmonella]	-	-	FALSE	FALSE
AEF08739.1	98	1	Extracellular	0.789	0	0.7799	TRUE	-	translocation machinery component	MULTISPECIES: SPI-1 type III secretion system needle tip complex protein SipC pathogenicity island 1 effector protein SipC, partial SPI-1 type III secretion system needle tip complex protein SipC SPI-1 type III secretion system needle tip complex protein SipC, partial	SipC	WP_000909019.1	MULTISPECIES: SPI-1 type III secretion system needle tip complex protein SipC [Salmonella]	-	-	FALSE	FALSE
AEF09471.1	94.9	0.97	Extracellular	0.81	0	0.833	TRUE	-	long polar fimbrial minor protein	long polar fimbrial protein LpfE MULTISPECIES: long polar fimbrial protein LpfE long polar fimbrial protein LpfD long polar fimbrial minor protein long polar fimbrial protein LpfE, partial Fimbrial protein	LpfE, LpfD	WP_000792957.1	MULTISPECIES: long polar fimbrial protein LpfE [Salmonella]	-	-	FALSE	FALSE
AEF09474.1	92.4	0.97	Extracellular	0.834	0	0.7384	TRUE	-	long polar fimbrial protein A precursor	long polar fimbria major subunit LpfA long polar fimbrial protein LpfA MULTISPECIES: long polar fimbria major subunit LpfA MULTISPECIES: long polar fimbrial major subunit LpfA long polar fimbrial major subunit LpfA long polar fimbria major subunit LpfA, partial long polar fimbrial protein LpfA, partial Long polar fimbria protein A precursor, partial Fimbrial subunit, partial long polar fimbria pr…	LpfA		-	-	-	FALSE	FALSE
AEF09588.1	95.7	1	Extracellular	0.859	1	0.6916	TRUE	-	putative autotransporter	autotransporter MULTISPECIES: intestinal colonization autotransporter adhesin MisL intestinal colonization autotransporter adhesin MisL intestinal colonization autotransporter adhesin MisL, partial	MisL	WP_001143053.1	MULTISPECIES: intestinal colonization autotransporter adhesin MisL [Salmonella]	-	-	TRUE	FALSE
AEF10021.1	90.9	0.97	Extracellular	0.94	1	1.251	TRUE	-	putative outer membrane protein	exopolysaccharide production protein YjbE hypothetical protein AIM85_21660 conserved hypothetical protein putative exported protein hypothetical protein SARI_03460 hypothetical protein SEEI0720_022920 hypothetical protein SEHO0A_04289 YjbE secreted protein exopolysaccharide production YjbE family protein Exopolysaccharide production secreted protein hypothetical protein R535_17510 hypothetical pr…	YjbE		-	-	-	FALSE	FALSE
AEF10380.1	95	0.96	Extracellular	0.918	0	0.7917	TRUE	-	putative major fimbrial subunit	type 1 fimbrial protein MULTISPECIES: fimbrial major subunit SthE fimbrial major subunit SthE SthE, partial type 1 fimbrial protein, partial	SthE	WP_001253768.1	MULTISPECIES: fimbrial major subunit SthE [Salmonella]	-	-	FASLE	FALSE
AEF06126.1	99.7	1	Outer Membrane	0.749	0	0.5809	TRUE	-	ferrichrome outer membrane transporter	ferrichrome porin FhuA MULTISPECIES: ferrichrome porin FhuA TonB-dependent siderophore receptor ferrichrome iron receptor	FhuA	WP_000113220.1	MULTISPECIES: ferrichrome porin FhuA [Salmonella]	GO:0015891 GO:0015344 GO:0038023 GO:0009279	siderophore uptake transmembrane transporter activity|0015344 signaling receptor activity|0038023	FALSE	FALSE
AEF06179.1	90.9	0.99	Outer Membrane	0.648	0	0.5808	TRUE	-	outer membrane lipoprotein	MULTISPECIES: Rcs stress response system protein RcsF Rcs stress response system protein RcsF Rcs stress response system protein RcsF, partial Protein rcsF colanic acid biosynthesis protein RcsF, partial outer membrane lipoprotein RcsF hypothetical protein SARI_02757 RcsF protein exopolysaccharide synthesis regulator RcsF protein rcsF	RcsF	WP_001202315.1	MULTISPECIES: Rcs stress response system protein RcsF [Salmonella]	-	-	FALSE	FALSE
AEF06295.1	96.5	1	Outer Membrane	0.561	0	0.5884	TRUE	-	ferrioxamine receptor	MULTISPECIES: ferrioxamine B receptor FoxA ferrioxamine B receptor FoxA ferrioxamine B receptor FoxA, partial TonB-dependent siderophore receptor	FoxA	WP_001127725.1	MULTISPECIES: ferrioxamine B receptor FoxA [Salmonella]	-	-	FALSE	FALSE
AEF06344.1	95	1	Outer Membrane	0.84	0	0.5408	TRUE	-	nucleoside channel	nucleoside-specific channel-forming protein Tsx, partial nucleoside channel; receptor of phage T6 and colicin K Nucleoside-specific channel-forming protein Tsx nucleoside channel phage T6/colicin K receptor MULTISPECIES: nucleoside-specific channel-forming protein Tsx nucleoside-specific channel-forming protein Tsx ion channel protein Tsx nucleoside-specific channel-forming protein tsx precursor …	Tsx	WP_000752021.1	MULTISPECIES: nucleoside-specific channel-forming protein Tsx [Salmonella]	-	-	FALSE	FALSE
AEF07078.1	98.9	1	Outer Membrane	0.785	0	0.5083	TRUE	-	ferric-rhodotorulic acid outer membrane transporter	ferric-rhodotorulic acid outer membrane transporter MULTISPECIES: ferric-rhodotorulic acid/ferric-coprogen receptor FhuE ferric-rhodotorulic acid/ferric-coprogen receptor FhuE Putative OMR family iron-siderophore receptor precursor FhuE receptor	FhuE	WP_000008410.1	MULTISPECIES: ferric-rhodotorulic acid/ferric-coprogen receptor FhuE [Salmonella]	GO:0015891 GO:0015344 GO:0038023 GO:0009279	siderophore uptake transmembrane transporter activity|0015344 signaling receptor activity|0038023	FALSE	FALSE
AEF07313.1	90.9	0.99	Outer Membrane	0.763	0	0.9263	TRUE	-	putative outer membrane lipoprotein	MULTISPECIES: outer membrane lipoprotein SlyB outer membrane lipoprotein SlyB outer membrane lipoprotein SlyB, partial outer membrane lipoprotein SlyB precursor putative outer membrane lipoprotein, partial hypothetical protein AWJ61_24510, partial membrane protein, partial glycine zipper 2TM domain-containing protein, partial outer membrane lipoprotein pcp, partial hypothetical protein L243_01520…	SlyB	WP_000597179.1	MULTISPECIES: outer membrane lipoprotein SlyB [Salmonella]	-	-	TRUE	FALSE
AEF07604.1	91.8	1	Outer Membrane	0.784	0	0.8426	TRUE	-	outer membrane protein W	MULTISPECIES: outer membrane protein OmpW Outer membrane protein W precursor outer membrane protein OmpW outer membrane protein W hypothetical protein A3219_10895 outer membrane protein W, partial hypothetical protein AH86_23395, partial	OmpW	WP_000714799.1	MULTISPECIES: outer membrane protein OmpW [Salmonella]	GO:0019867	-	FALSE	FALSE
AEF08116.1	99.7	1	Outer Membrane	0.591	0	0.7351	TRUE	-	colicin I receptor	MULTISPECIES: catecholate siderophore receptor CirA catecholate siderophore receptor CirA colicin I receptor precursor	CirA	WP_000488255.1	MULTISPECIES: catecholate siderophore receptor CirA [Salmonella]	-	-	FALSE	FALSE
AEF08310.1	96.5	1	Outer Membrane	0.713	0	0.6106	TRUE	-	outer membrane protease	Protease VII (Omptin) precursor MULTISPECIES: omptin family outer membrane protease PgtE omptin family outer membrane protease PgtE putative protease 7 protease 7 omptin family outer membrane protease PgtE, partial outer membrane protease	PgtE	WP_000716007.1	MULTISPECIES: omptin family outer membrane protease PgtE [Salmonella]	-	-	TRUE	FALSE
AEF08334.1	93.9	0.95	Outer Membrane	0.791	0	0.5878	TRUE	-	hypothetical protein STMUK_2455	MULTISPECIES: outer membrane protein hypothetical protein MULTISPECIES: outer membrane protein OmpK outer membrane protein OmpK putative outer membrane protein hypothetical protein EIC79_06095 hypothetical protein C9F09_10405 hypothetical protein ABT89_04390 hypothetical protein DE17_11155 hypothetical protein ELZ87_07045	OmpK	WP_000722926.1	MULTISPECIES: outer membrane protein [Salmonella]	-	-	TRUE	FALSE
AEF08399.1	94.9	0.99	Outer Membrane	0.51	0	0.5793	TRUE	-	lipoprotein	MULTISPECIES: outer membrane protein assembly factor BamC outer membrane protein assembly factor BamC lipoprotein	BamC	WP_000331877.1	MULTISPECIES: outer membrane protein assembly factor BamC [Salmonella]	-	-	TRUE	FALSE
AEF08592.1	90.9	0.99	Outer Membrane	0.554	0	0.59	TRUE	-	hypothetical protein STMUK_2720	MULTISPECIES: outer membrane protein assembly factor BamE outer membrane protein assembly factor BamE outer membrane protein assembly factor BamE, partial membrane biogenesis protein small protein A unnamed protein product Outer membrane lipoprotein SmpA outer membrane biogenesis protein BamE, partial outer membrane biogenesis protein BamE	BamE, SmpA	WP_001203445.1	MULTISPECIES: outer membrane protein assembly factor BamE [Salmonella]	-	-	FALSE	FALSE
AEF06234.1	90.9	0.98	Periplasmic	0.575	1	0.5029	TRUE	-	putative fimbrial subunit	MULTISPECIES: AfaD family invasin pilin structural protein SafD AfaD family invasin SafD, partial fimbrial structural subunit	SafD	WP_000266939.1	MULTISPECIES: AfaD family invasin [Salmonella]	-	-	FALSE	FALSE
AEF06670.1	91.8	0.98	Periplasmic	0.617	0	0.5586	TRUE	YbgF	tol-pal system protein YbgF	MULTISPECIES: cell division protein CpoB cell division protein CpoB Cell division coordinator CpoB tol-pal system protein YbgF cell division protein CpoB, partial	CpoB, YbgF	WP_000097552.1	MULTISPECIES: cell division protein CpoB [Salmonella]	GO:0051301 GO:0070206 GO:0005515	protein binding|0005515	FALSE	FALSE
AEF07117.1	90.9	0.94	Periplasmic	0.569	0	0.6191	TRUE	-	putative envelope protein	MULTISPECIES: RICIN domain-containing protein RICIN domain-containing protein ricin-type beta-trefoil lectin domain protein lipoprotein EnvE MULTISPECIES: ricin-type beta-trefoil lectin domain protein putative lipoprotein envE precursor	EnvE	WP_001520581.1	MULTISPECIES: RICIN domain-containing protein [Salmonella]	-	-	FALSE	FALSE
AEF07350.1	90.9	0.98	Periplasmic	0.655	1	1.0442	TRUE	-	acid shock protein precursor	acid resistance repetitive basic protein Asr acid shock protein acid shock protein precursor acid-shock protein MULTISPECIES: acid resistance repetitive basic protein Asr acid resistance repetitive basic protein Asr, partial acid shock protein, partial hypothetical protein SEEJ0720_02927 hypothetical protein R643_20220 hypothetical protein P381_10785 hypothetical protein SEEM501_15213 acid-shock …	Asr		-	-	-	FASLE	FALSE
AEF09863.1	91	0.99	Outer Membrane	0.622	0	0.7905	FALSE	-	putative outer membrane protein	MULTISPECIES: oligogalacturonate-specific porin KdgM family protein oligogalacturonate-specific porin KdgM family protein hypothetical protein hypothetical protein ELZ68_22440 oligogalacturonate-specific porin KdgM family protein, partial	-	WP_000378721.1	MULTISPECIES: oligogalacturonate-specific porin KdgM family protein [Salmonella]	-	-	TRUE	TRUE
AEF06480.1	94.6	0.97	Extracellular	0.622	0	0.678	FALSE	-	putative fimbrial protein	MULTISPECIES: fimbria assembly protein fimbriae assembly protein fimbria assembly protein adhesin fimbrial protein fimbria assembly protein, partial fimbria-like protein FimF precursor	-	WP_000603405.1	MULTISPECIES: fimbria assembly protein [Salmonella]	-	-	TRUE	TRUE
AEF06499.1	95.9	1	Outer Membrane	0.613	0	0.6484	FALSE	-	outer membrane esterase	Outer membrane esterase autotransporter domain-containing esterase outer membrane esterase autotransporter domain-containing protein MULTISPECIES: autotransporter domain-containing esterase MULTISPECIES: autotransporter domain-containing protein lipase 1	-	WP_000192436.1	autotransporter domain-containing esterase [Salmonella enterica]	-	-	TRUE	TRUE
AEF06700.1	94.1	0.99	Outer Membrane	0.687	0	0.5935	FALSE	-	putative pectinesterase	MULTISPECIES: putative acyl-CoA thioester hydrolase putative acyl-CoA thioester hydrolase acyl-CoA thioesterase acyl-CoA thioesterase, partial possible pectinesterase precursor	-	WP_001094775.1	MULTISPECIES: putative acyl-CoA thioester hydrolase [Salmonella]	GO:0042545 GO:0030599	pectinesterase activity|0030599	TRUE	TRUE
AEF10024.1	98.3	0.95	Outer Membrane	0.561	0	0.5504	FALSE	-	putative outer membrane lipoprotein	lipoprotein MULTISPECIES: YjbH domain-containing protein YjbH domain-containing protein YjbH outer membrane lipoprotein	-	WP_000750804.1	MULTISPECIES: YjbH domain-containing protein [Salmonella]	-	-	TRUE	TRUE
AEF05957.1	97.2	1	Outer Membrane	0.704	0	0.5704	TRUE	-	fimbrial usher	fimbrial biogenesis outer membrane usher protein MULTISPECIES: fimbrial usher BcfC fimbrial usher BcfC fimbrial biogenesis usher protein BcfC fimbrial usher protein fimbrial biogenesis usher protein Chitinase outer membrane usher protein FimD	BcfC, FimD	WP_001245854.1	MULTISPECIES: fimbrial usher BcfC [Salmonella]	-	-	TRUE	TRUE
AEF06556.1	90.9	1	Outer Membrane	0.67	1	0.7121	TRUE	-	palmitoyl transferase	phospholipid:lipid A palmitoyltransferase MULTISPECIES: lipid IV(A) palmitoyltransferase PagP lipid IV(A) palmitoyltransferase PagP phospholipid:lipid A palmitoyltransferase, partial RecName: Full=Lipid A acyltransferase PagP; AltName: Full=Lipid A acylation protein; Flags: Precursor hypothetical protein SPAB_02929	PagP	WP_000289054.1	MULTISPECIES: lipid IV(A) palmitoyltransferase PagP [Salmonella]	-	-	TRUE	TRUE
AEF06873.1	97.5	1	Outer Membrane	0.754	0	0.8459	TRUE	-	outer membrane protein F precursor	MULTISPECIES: porin OmpF porin OmpF outer membrane protein (OmpF) outer membrane protein 1a (IA%3Bb%3Bf)%2C porin outer membrane protein F Outer membrane protein F precursor outer membrane protein Fx	OmpF	WP_000977713.1	MULTISPECIES: porin OmpF [Salmonella]	-	-	TRUE	TRUE
AEF07866.1	96.2	1	Outer Membrane	0.734	0	0.8864	TRUE	-	putative porin	MULTISPECIES: porin OmpS1 porin OmpS1 porin OmpC porin OmpS1, partial	OmpC, OmpS1	WP_001080680.1	MULTISPECIES: porin OmpS1 [Salmonella]	-	-	TRUE	TRUE
AEF08184.1	98.5	1	Outer Membrane	0.745	0	0.786	TRUE	-	outer membrane porin protein C	MULTISPECIES: porin OmpC porin OmpC porin outer membrane protein C OmpC OmpC, partial outer membrane protein, partial unnamed protein product	OmpC	WP_000865526.1	MULTISPECIES: porin OmpC [Salmonella]	-	-	TRUE	TRUE
AEF08880.1	95.1	1	Outer Membrane	0.629	0	0.6722	TRUE	-	putative outer membrane usher protein	fimbrial outer membrane usher protein StdB MULTISPECIES: fimbrial outer membrane usher protein StdB fimbrial biogenesis outer membrane usher protein	StdB	WP_000705476.1	fimbrial outer membrane usher protein StdB [Salmonella enterica]	-	-	TRUE	TRUE
AEF09827.1	91	0.99	Outer Membrane	0.646	0	0.7802	TRUE	-	outer membrane porin L	oligogalacturonate-specific porin protein MULTISPECIES: porin OmpL hypothetical protein SPAB_04974 porin OmpL Outer membrane sugar transport protein YshA putative outer membrane protein porin	OmpL, YshA	WP_000838828.1	MULTISPECIES: porin OmpL [Salmonella]	-	-	TRUE	TRUE
AEF06160.1	94.7	0.98	Periplasmic	0.52	0	0.5595	TRUE	-	periplasmic chaperone	MULTISPECIES: molecular chaperone Skp molecular chaperone Skp molecular chaperone outer membrane protein molecular chaperone Skp, partial periplasmic chaperone OmpH family outer membrane protein, partial OmpH family outer membrane protein molecular chaperone, partial outer membrane protein OmpH periplasmic chaperone, partial Outer membrane protein OmpH, partial Outer membrane protein OmpH chapero…	Skp, OmpH	WP_000758966.1	MULTISPECIES: molecular chaperone Skp [Salmonella]	-	-	TRUE	TRUE
AEF08270.1	93.8	1	Periplasmic	0.531	0	0.6012	TRUE	-	histidine transport protein	hypothetical protein BXA16_23640 MULTISPECIES: histidine ABC transporter substrate-binding protein HisJ histidine ABC transporter substrate-binding protein HisJ zinc transporter histidine ABC transporter substrate-binding protein HisJ, partial zinc transporter, partial histidine-binding periplasmic protein none	HisJ	WP_000731868.1	MULTISPECIES: histidine ABC transporter substrate-binding protein HisJ [Salmonella]	-	-	TRUE	TRUE
AEF09108.1	91.9	0.98	Periplasmic	0.717	1	0.693	TRUE	-	hypothetical protein STMUK_3251	MULTISPECIES: division/outer membrane stress-associated lipid-binding lipoprotein osmotically-inducible protein OsmY division/outer membrane stress-associated lipid-binding lipoprotein divisome-associated lipoprotein YraP possible lipoprotein division/outer membrane stress-associated lipid-binding lipoprotein, partial lipoprotein outer membrane lipoprotein hemolysin precursor osmotically-inducibl…	OsmY, YraP	WP_000643280.1	MULTISPECIES: division/outer membrane stress-associated lipid-binding lipoprotein [Salmonella]	GO:0006970	-	TRUE	TRUE
AEF09689.1	97.7	1	Periplasmic	0.793	1	0.5936	TRUE	-	phosphate ABC transporter periplasmic substrate-binding protein PstS	MULTISPECIES: phosphate ABC transporter substrate-binding protein PstS phosphate ABC transporter substrate-binding protein PstS Periplasmic phosphate binding protein phosphate ABC transporter periplasmic substrate-binding protein PstS	PstS	WP_000867130.1	MULTISPECIES: phosphate ABC transporter substrate-binding protein PstS [Salmonella]	GO:0035435 GO:0042301 GO:0043190	phosphate ion binding|0042301	TRUE	TRUE
AEF10384.1	93.7	0.97	Extracellular	0.954	0	0.8187	TRUE	-	putative fimbrial chaparone	putative fimbrial protein SthA, partial MULTISPECIES: fimbrial protein fimbrial protein SthA fimbrial protein fimbrial protein, partial	SthA	WP_000482239.1	MULTISPECIES: fimbrial protein [Salmonella]	-	-	TRUE	TRUE
AEF06514.1	99.6	1	Outer Membrane	0.713	0	0.7564	TRUE	FepA	outer membrane receptor FepA	MULTISPECIES: TonB-dependent siderophore receptor TonB-dependent siderophore receptor	-	WP_001034955.1	MULTISPECIES: TonB-dependent siderophore receptor [Salmonella]	-	-	TRUE	TRUE
AEF07457.1	98.2	1	Outer Membrane	0.581	0	0.7279	TRUE	-	putative outer membrane receptor	MULTISPECIES: TonB-dependent receptor PqqU TonB-dependent receptor TonB-dependent receptor PqqU TonB-dependent receptor domain protein TonB-dependent siderophore receptor putative outer membrane receptor TonB-dependent receptor YncD hypothetical protein SEEPB962_02832 hypothetical protein SEES004_08912 hypothetical protein SPAB_01702 TonB dependent receptor	PqqU, YncD	WP_000692042.1	MULTISPECIES: TonB-dependent receptor [Salmonella]	-	-	TRUE	TRUE
AEF08636.1	99.3	1	Outer Membrane	0.607	0	0.8007	TRUE	FepA	outer membrane receptor FepA	TonB-dependent siderophore receptor MULTISPECIES: TonB-dependent siderophore receptor outer membrane receptor protein outer membrane receptor FepA	FepA		-	-	-	TRUE	TRUE
AEF10030.1	97.7	1	Outer Membrane	0.768	0	0.7475	TRUE	-	maltoporin	Maltoporin (maltose maltodextrin high-affinity receptor) MULTISPECIES: maltoporin maltoporin LamB maltoporin LamB porin MULTISPECIES: maltoporin LamB LamB maltoporin facilitating translocation protein Maltoporin	LamB	WP_000973645.1	MULTISPECIES: maltoporin [Salmonella]	-	-	TRUE	TRUE
AEF10041.1	97.2	0.95	Outer Membrane	0.559	0	0.6431	TRUE	-	conjugative transfer protein	MULTISPECIES: conjugal transfer protein TraF conjugal transfer protein TraF conjugal transfer protein	TraF	WP_001039339.1	MULTISPECIES: conjugal transfer protein TraF [Salmonella]	-	-	TRUE	TRUE
AEF08671.1	98.4	1	Periplasmic	0.624	0	0.5118	TRUE	-	glycine betaine transporter periplasmic subunit	MULTISPECIES: glycine betaine/L-proline ABC transporter substrate-binding protein ProX L-proline glycine betaine binding ABC transporter protein ProX glycine betaine/L-proline ABC transporter substrate-binding protein ProX proline/glycine betaine ABC transporter substrate-binding protein ProX glycine betaine transporter periplasmic subunit glycine/betaine/proline transport protein glycine betaine…	ProX	WP_001216622.1	MULTISPECIES: glycine betaine/L-proline ABC transporter substrate-binding protein ProX [Salmonella]	GO:0055085 GO:0022857 GO:0043190	transmembrane transporter activity|0022857	TRUE	TRUE
AEF10350.1	90.9	1	Periplasmic	0.715	0	0.8815	TRUE	-	periplasmic protein	MULTISPECIES: molecular chaperone OsmY molecular chaperone OsmY hypothetical protein DK39_05240 Putative periplasmic protein putative periplasmic protein molecular chaperone OsmY, partial periplasmic protein periplasmic protein, partial Osmotically inducible protein OsmY, partial Osmotically inducible protein OsmY hypothetical protein A3219_18020, partial none BON domain-containing protein, parti…	OsmY	WP_000178963.1	MULTISPECIES: molecular chaperone OsmY [Salmonella]	-	-	TRUE	TRUE
In Phase I (Subtractive Proteomics), 4,555 UK-1 proteins were filtered for: a high Vaxign ML Probability antigenicity score (>0.50), a PSORTb Localization Probability that indicated proteins were outer membrane/extracellular/periplasmic, a high SPAAN Adhesion Probability (>0.50), 0-1 transmembrane helices (TMHMM),
a high VaxiJen antigenicity Score (>0.50), no protein descriptions (UK-1 GenBank (GCA_000213635.1), UK-1 RefSeq (GCF_000213635.1), Similar Salmonella Proteins (>98% BLAST identity) with LPS, plasmid or flagella, negative homology to potential host proteins (n=6) (BLAST E-value > 1e-4),
and positive homology (>98% BLAST identity) to proteins from six clinically-relevant and poultry-associated serovars.
*Gene ontology information is from UK-1 RefSeq annotation.
^TRUE in the Epitopic column indicates that the protein was found to have epitopes that passed Phase II (Epitope Discovery) filters
#TRUE in Construct column indicates the protein has an epitope in the final multiepitope construct

## Sheet: ST 3 - LBL Residues
Supplementary Table 3: BepiPred linear B lymphocyte epitope identities and percentages across all construct epitopes
GenBank Accession	Epitope Type	Position	BepiPred LBL Residues*	LBL Residue Percentage^
AEF07457.1	CTL	56	iegedmrla	0
AEF08880.1	CTL	793	gedrrtlnv	0
AEF09108.1	CTL	163	teregkaaa	0
AEF08270.1	CTL	223	kedNelrea	11.1111
AEF08671.1	CTL	300	SEADvqghv	44.4444
AEF09863.1	CTL	184	yeynfrtay	0
AEF08636.1	CTL	327	yektdntrm	0
AEF10024.1	CTL	103	kdkafdvkl	0
AEF06514.1	CTL	620	ketgerlsi	0
AEF05957.1	Th	337	asgdltvevkesdgs	0
AEF06480.1	Th	109	aqklaieirDGDQRR	40
AEF10041.1	Th	385	ragyradvknndsnv	0
AEF08184.1	Th	41	lhyfsDDKGSDGdqt	46.6667
AEF09689.1	Th	153	qniavvrradgsgts	0
AEF09827.1	Th	184	Hweitntfryrineh	6.66667
AEF06514.1	Th	449	tpglrfdhhsivgdn	0
AEF06514.1	Th	666	qgnpvtgtdkqavsp	0
AEF06499.1	Th	598	taltfsrdgktqdkn	0
AEF10350.1	LBL/CTL	28	aENATTDKA	88.8889
AEF06160.1	LBL/CTL	46	LENEFKGRA	100
AEF10041.1	LBL/CTL	188	DERVALREA	100
AEF10384.1	LBL/CTL	56	KERIAEKGA	100
AEF06873.1	LBL/Th	210	aaysnskRTNDQQDR	53.3333
AEF09863.1	LBL/Th	127	aryrfEYVRRSSDIR	66.6667
AEF06556.1	LBL/Th	60	twHARFAYDKEKTDR	86.6667
AEF06700.1	LBL/Th	381	krpfagnTGTVDDKD	53.3333
AEF07866.1	LBL/Th	334	SRGNYRYTDKDlvky	73.3333
AEF10030.1	LBL/Th	286	SDGTKINYAnKVinn	73.3333
CTL = cytotoxic T lymphocyte; Th = helper T lymphocyte; LBL = linear B lymphocyte
*Upper case letters in the BepiPred LBL Residues column indicates a residue that was identified as a LBL residue by BepiPred
^Percentage of the epitope protein sequence that was identified as an LBL residue by BepiPred; a CTL and Th epitopes required LBL Residue Percentages of ≥88.9% (≥8/9) and 53.3% (≥8/15) to be manually curate sequences for consecutive LBL residues
LBL residues only represent 10% of the potential B lymphocyte epitopes, with confirmational epitopes representing the other 90%. To conserve construct space CTL and Th epitopes sequences were required to have 8 or more consecutive BepiPred-identified LBL residues to be considered a dual-purpose LBL epitope i.e. a CTL or TH epitope that also had LBL characteristics.

## Sheet: ST 4 - Epi Pos Homology
Supplementary Table 4: Percentage of each serovar's proteomes that the vaccine construct's epitopes have greater than or equal to 99% protein sequence identity with
GenBank Accession	Epitope Type	Start Position*	S. Enteritidis Proteomes Homology (%)	S. Hadar Proteomes Homology (%)	S. Infantis Proteomes Homology (%)	S. Kentucky Proteomes Homology (%)	S. Typhimurium Proteomes Homology (%)	S. Uganda Proteomes Homology (%)
AEF06700.1	Th/LBL	381	99.8649	100	99.9858	99.8739	100	100
AEF08636.1	CTL	327	99.9703	100	99.9929	99.982	99.9962	100
AEF10041.1	Th	385	99.9622	100	99.9929	99.982	99.9923	100
AEF10350.1	CTL/LBL	28	99.9649	100	99.9858	99.964	99.9885	100
AEF06160.1	CTL/LBL	46	99.9054	100	99.9929	99.8018	99.9808	100
AEF07866.1	Th/LBL	334	99.9486	99.9413	99.8292	99.5946	99.9808	100
AEF06514.1	Th	666	99.9892	100	99.9929	99.8919	99.9769	100
AEF06499.1	Th	598	99.9189	99.9413	99.9502	99.3874	99.9654	100
AEF09689.1	Th	153	99.9676	99.9413	99.9929	99.973	99.9615	100
AEF10384.1	CTL/LBL	56	99.8946	100	99.936	99.9189	99.9615	100
AEF09108.1	CTL	163	99.9378	100	99.9715	99.973	99.9423	100
AEF06480.1	Th	109	99.9757	100	99.9573	99.973	99.9192	100
AEF10024.1	CTL	103	99.8541	100	99.936	99.8919	99.8999	100
AEF08671.1	CTL	300	99.9649	100	99.815	99.9369	99.8961	100
AEF06556.1	Th/LBL	60	99.9541	100	99.8719	99.9189	99.8614	100
AEF10041.1	CTL/LBL	188	99.9162	99.4718	99.9146	99.9369	99.7768	100
AEF08270.1	CTL	223	99.9216	99.9413	99.9787	99.973	99.7729	100
AEF08184.1	Th	41	99.8216	99.9413	99.025	99.9279	99.7537	100
AEF08880.1	CTL	793	99.7811	99.8826	99.8292	99.5946	99.6921	100
AEF09863.1	CTL	184	99.9405	100	99.9502	99.955	99.2303	100
AEF09863.1	Th/LBL	127	99.8054	100	99.936	99.955	99.2072	100
AEF10030.1	Th/LBL	286	99.8838	100	99.9075	99.1802	99.9038	99.8959
AEF07457.1	CTL	56	99.8054	99.9413	99.7936	99.7658	99.7267	99.8959
AEF05957.1	Th	337	99.8027	100	99.8292	99.8739	99.4843	99.8959
AEF06873.1	Th/LBL	210	99.8243	100	99.9644	99.9189	99.9615	99.7919
AEF06514.1	CTL	620	99.8081	100	99.8648	99.0811	99.8153	99.7919
AEF06514.1	Th	449	99.7892	100	99.8577	99.0811	99.6382	99.7919
AEF09827.1	Th	184	99.9054	99.8826	99.8933	99.6937	99.7652	99.4797
CTL = cytotoxic T lymphocyte; Th = helper T lymphocyte; LBL = linear B lymphocyte
*Start position refers to the amino acid position within the antigenic protein where the epitope begins.
Tested 526 immunogenic (CTL only), antigenic, non-toxic, and hydrophilic CTL and Th epitopes for positive homology (BLASTp percent identity >99%) to NCBI proteomes for six clinically relevant and poultry-associated Salmonella enterica subspecies enterica (S.) serovars.
NCBI proteomes were last accessed on 07/03/23 and included: S. Enteritidis (37,000 proteomes, taxid:149539), S. Infantis (14,052 proteomes, taxid:595), S. Hadar (1,304 proteomes, taxid:149385), S. Kentucky (11,000 proteomes, taxid:192955), S. Typhimurium (25,983 proteomes, taxid:90371), and S. Uganda (961 proteomes, taxid:487004).

## Sheet: ST 5 - MEVC Epi Prop
Supplementary Table 5: Additional Cytotoxic T lymphocyte (MHCI), helper T lymphocyte (MHCII), and dual-purpose T and B lymphocyte epitope properties
GenBank Accession	MHC Type	Start Position*	Peptide	NetMHCpan/ NetMHCIIpan Score EL	NetMHCpan/ NetMHCIIpan % Rank EL	ToxinPred SVM Score	Hydrophobicity	GRAVY Hydropathicity	Hydrophilicity	Charge	Protein Annotation Source^	Protein Name	Similar Salmonella Proteins Descriptions	RefSeq Accession	RefSeq Protein Description	Gene Ontology Terms#	Gene Ontology Functions#
AEF07457.1	MHCI	56	IEGEDMRLA	0.278696	0.432	-1.31	-0.2	-0.38	0.73	-2	SSP	PqqU, YncD	MULTISPECIES: TonB-dependent receptor PqqU TonB-dependent receptor TonB-dependent receptor PqqU TonB-dependent receptor domain protein TonB-dependent siderophore receptor putative outer membrane receptor TonB-dependent receptor YncD hypothetical protein SEEPB962_02832 hypothetical protein SEES004_08912 hypothetical protein SPAB_01702 TonB dependent receptor	WP_000692042.1	MULTISPECIES: TonB-dependent receptor [Salmonella]
AEF08880.1	MHCI	793	GEDRRTLNV	0.542598	0.3305	-1.47	-0.49	-1.4	0.94	0	RefSeq SSP	StdB StdB	fimbrial outer membrane usher protein StdB MULTISPECIES: fimbrial outer membrane usher protein StdB fimbrial biogenesis outer membrane usher protein	WP_000705476.1	fimbrial outer membrane usher protein StdB [Salmonella enterica]
AEF09108.1	MHCI	163	TEREGKAAA	0.663852	0.074	-0.8	-0.37	-1.23	1.12	0	SSP	OsmY, YraP	MULTISPECIES: division/outer membrane stress-associated lipid-binding lipoprotein osmotically-inducible protein OsmY division/outer membrane stress-associated lipid-binding lipoprotein divisome-associated lipoprotein YraP possible lipoprotein division/outer membrane stress-associated lipid-binding lipoprotein, partial lipoprotein outer membrane lipoprotein hemolysin precursor osmotically-inducibl…	WP_000643280.1	MULTISPECIES: division/outer membrane stress-associated lipid-binding lipoprotein [Salmonella]	GO:0006970
AEF08270.1	MHCI	223	KEDNELREA	0.485388	0.181	-0.79	-0.59	-2.26	1.77	-2	RefSeq SSP	HisJ HisJ	hypothetical protein BXA16_23640 MULTISPECIES: histidine ABC transporter substrate-binding protein HisJ histidine ABC transporter substrate-binding protein HisJ zinc transporter histidine ABC transporter substrate-binding protein HisJ, partial zinc transporter, partial histidine-binding periplasmic protein none	WP_000731868.1	MULTISPECIES: histidine ABC transporter substrate-binding protein HisJ [Salmonella]
AEF08671.1	MHCI	300	SEADVQGHV	0.526427	0.285	-1.19	-0.13	-0.52	0.28	-1.5	RefSeq SSP	ProX ProX	MULTISPECIES: glycine betaine/L-proline ABC transporter substrate-binding protein ProX L-proline glycine betaine binding ABC transporter protein ProX glycine betaine/L-proline ABC transporter substrate-binding protein ProX proline/glycine betaine ABC transporter substrate-binding protein ProX glycine betaine transporter periplasmic subunit glycine/betaine/proline transport protein glycine betaine…	WP_001216622.1	MULTISPECIES: glycine betaine/L-proline ABC transporter substrate-binding protein ProX [Salmonella]	GO:0055085 GO:0022857 GO:0043190	transmembrane transporter activity 0022857 IEA
AEF09863.1	MHCI	184	YEYNFRTAY	0.410717	0.401667	-1.18	-0.25	-1.28	-0.46	0			MULTISPECIES: oligogalacturonate-specific porin KdgM family protein oligogalacturonate-specific porin KdgM family protein hypothetical protein hypothetical protein ELZ68_22440 oligogalacturonate-specific porin KdgM family protein, partial	WP_000378721.1	MULTISPECIES: oligogalacturonate-specific porin KdgM family protein [Salmonella]
AEF08636.1	MHCI	327	YEKTDNTRM	0.684823	0.168	-0.6	-0.55	-2.19	0.87	0	Genbank SSP	FepA FepA	TonB-dependent siderophore receptor MULTISPECIES: TonB-dependent siderophore receptor outer membrane receptor protein outer membrane receptor FepA
AEF10024.1	MHCI	103	KDKAFDVKL	0.415023	0.453	-1.02	-0.31	-0.68	0.97	1			lipoprotein MULTISPECIES: YjbH domain-containing protein YjbH domain-containing protein YjbH outer membrane lipoprotein	WP_000750804.1	MULTISPECIES: YjbH domain-containing protein [Salmonella]
AEF06514.1	MHCI	620	KETGERLSI	0.607497	0.192	-1.52	-0.35	-1	0.92	0	Genbank	FepA	MULTISPECIES: TonB-dependent siderophore receptor TonB-dependent siderophore receptor	WP_001034955.1	MULTISPECIES: TonB-dependent siderophore receptor [Salmonella]
AEF05957.1	MHCII	337	ASGDLTVEVKESDGS	0.810682	0.15	-0.88	-0.17	-0.52	0.68	-3	RefSeq SSP	BcfC BcfC, FimD	fimbrial biogenesis outer membrane usher protein MULTISPECIES: fimbrial usher BcfC fimbrial usher BcfC fimbrial biogenesis usher protein BcfC fimbrial usher protein fimbrial biogenesis usher protein Chitinase outer membrane usher protein FimD	WP_001245854.1	MULTISPECIES: fimbrial usher BcfC [Salmonella]
AEF06480.1	MHCII	109	AQKLAIEIRDGDQRR	0.765351	0.265	-0.91	-0.48	-1.26	1	1			MULTISPECIES: fimbria assembly protein fimbriae assembly protein fimbria assembly protein adhesin fimbrial protein fimbria assembly protein, partial fimbria-like protein FimF precursor	WP_000603405.1	MULTISPECIES: fimbria assembly protein [Salmonella]
AEF10041.1	MHCII	385	RAGYRADVKNNDSNV	0.963099	0	-0.42	-0.43	-1.39	0.64	1	RefSeq SSP	TraF TraF	MULTISPECIES: conjugal transfer protein TraF conjugal transfer protein TraF conjugal transfer protein	WP_001039339.1	MULTISPECIES: conjugal transfer protein TraF [Salmonella]
AEF08184.1	MHCII	41	LHYFSDDKGSDGDQT	0.781289	0.3	-0.6	-0.29	-1.49	0.55	-2.5	RefSeq SSP	OmpC OmpC	MULTISPECIES: porin OmpC porin OmpC porin outer membrane protein C OmpC OmpC, partial outer membrane protein, partial unnamed protein product	WP_000865526.1	MULTISPECIES: porin OmpC [Salmonella]
AEF09689.1	MHCII	153	QNIAVVRRADGSGTS	0.598504	0.47	-0.83	-0.24	-0.41	0.25	1	Genbank RefSeq SSP	PstS PstS PstS	MULTISPECIES: phosphate ABC transporter substrate-binding protein PstS phosphate ABC transporter substrate-binding protein PstS Periplasmic phosphate binding protein phosphate ABC transporter periplasmic substrate-binding protein PstS	WP_000867130.1	MULTISPECIES: phosphate ABC transporter substrate-binding protein PstS [Salmonella]	GO:0035435 GO:0042301 GO:0043190	phosphate ion binding 0042301 IEA
AEF09827.1	MHCII	184	HWEITNTFRYRINEH	0.719817	0.33	-1	-0.32	-1.41	-0.08	1	RefSeq SSP	OmpL OmpL, YshA	oligogalacturonate-specific porin protein MULTISPECIES: porin OmpL hypothetical protein SPAB_04974 porin OmpL Outer membrane sugar transport protein YshA putative outer membrane protein porin	WP_000838828.1	MULTISPECIES: porin OmpL [Salmonella]
AEF06514.1	MHCII	449	TPGLRFDHHSIVGDN	0.755795	0.22	-1.13	-0.16	-0.67	0.03	0	Genebank	FepA	MULTISPECIES: TonB-dependent siderophore receptor TonB-dependent siderophore receptor	WP_001034955.1	MULTISPECIES: TonB-dependent siderophore receptor [Salmonella]
AEF06514.1	MHCII	666	QGNPVTGTDKQAVSP	0.757161	0.21	-0.98	-0.2	-0.93	0.17	0	Genebank	FepA	MULTISPECIES: TonB-dependent siderophore receptor TonB-dependent siderophore receptor	WP_001034955.1	MULTISPECIES: TonB-dependent siderophore receptor [Salmonella]
AEF06499.1	MHCII	598	TALTFSRDGKTQDKN	0.851314	0.085	-1.28	-0.4	-1.41	0.65	1			Outer membrane esterase autotransporter domain-containing esterase outer membrane esterase autotransporter domain-containing protein MULTISPECIES: autotransporter domain-containing esterase MULTISPECIES: autotransporter domain-containing protein lipase 1	WP_000192436.1	autotransporter domain-containing esterase [Salmonella enterica]
AEF10350.1	LBL/MHCI	28	AENATTDKA	0.52123	0.157	-0.35	-0.3	-1.16	0.77	-1	RefSeq SSP	OsmY OsmY	MULTISPECIES: molecular chaperone OsmY molecular chaperone OsmY hypothetical protein DK39_05240 Putative periplasmic protein putative periplasmic protein molecular chaperone OsmY, partial periplasmic protein periplasmic protein, partial Osmotically inducible protein OsmY, partial Osmotically inducible protein OsmY hypothetical protein A3219_18020, partial none BON domain-containing protein, parti…	WP_000178963.1	MULTISPECIES: molecular chaperone OsmY [Salmonella]
AEF06160.1	LBL/MHCI	46	LENEFKGRA	0.405319	0.255	-0.69	-0.35	-1.21	0.82	0	RefSeq SSP	Skp Skp, OmpH	MULTISPECIES: molecular chaperone Skp molecular chaperone Skp molecular chaperone outer membrane protein molecular chaperone Skp, partial periplasmic chaperone OmpH family outer membrane protein, partial OmpH family outer membrane protein molecular chaperone, partial outer membrane protein OmpH periplasmic chaperone, partial Outer membrane protein OmpH, partial Outer membrane protein OmpH chapero…	WP_000758966.1	MULTISPECIES: molecular chaperone Skp [Salmonella]
AEF10041.1	LBL/MHCI	188	DERVALREA	0.249528	0.49	-0.9	-0.43	-0.88	1.19	-1	RefSeq SSP	TraF TraF	MULTISPECIES: conjugal transfer protein TraF conjugal transfer protein TraF conjugal transfer protein	WP_001039339.1	MULTISPECIES: conjugal transfer protein TraF [Salmonella]
AEF10384.1	LBL/MHCI	56	KERIAEKGA	0.258402	0.473	-1.33	-0.42	-1.29	1.36	1	SSP	SthA	putative fimbrial protein SthA, partial MULTISPECIES: fimbrial protein fimbrial protein SthA fimbrial protein fimbrial protein, partial	WP_000482239.1	MULTISPECIES: fimbrial protein [Salmonella]
AEF06873.1	LBL/MHCII	210	AAYSNSKRTNDQQDR	0.729887	0.48	-1.25	-0.59	-2.26	0.85	1	RefSeq SSP	OmpF OmpF	MULTISPECIES: porin OmpF porin OmpF outer membrane protein (OmpF) outer membrane protein 1a (IA%3Bb%3Bf)%2C porin outer membrane protein F Outer membrane protein F precursor outer membrane protein Fx	WP_000977713.1	MULTISPECIES: porin OmpF [Salmonella]
AEF09863.1	LBL/MHCII	127	ARYRFEYVRRSSDIR	0.930034	0.005	-0.56	-0.57	-1.36	0.71	3			MULTISPECIES: oligogalacturonate-specific porin KdgM family protein oligogalacturonate-specific porin KdgM family protein hypothetical protein hypothetical protein ELZ68_22440 oligogalacturonate-specific porin KdgM family protein, partial	WP_000378721.1	MULTISPECIES: oligogalacturonate-specific porin KdgM family protein [Salmonella]
AEF06556.1	LBL/MHCII	60	TWHARFAYDKEKTDR	0.76764	0.255	-1.13	-0.47	-1.85	0.7	1.5	RefSeq SSP	PagP PagP	phospholipid:lipid A palmitoyltransferase MULTISPECIES: lipid IV(A) palmitoyltransferase PagP lipid IV(A) palmitoyltransferase PagP phospholipid:lipid A palmitoyltransferase, partial Lipid A acyltransferase PagP hypothetical protein SPAB_02929	WP_000289054.1	MULTISPECIES: lipid IV(A) palmitoyltransferase PagP [Salmonella]
AEF06700.1	LBL/MHCII	381	KRPFAGNTGTVDDKD	0.73505	0.46	-0.77	-0.36	-1.42	0.86	0			MULTISPECIES: putative acyl-CoA thioester hydrolase putative acyl-CoA thioester hydrolase acyl-CoA thioesterase acyl-CoA thioesterase, partial possible pectinesterase precursor	WP_001094775.1	MULTISPECIES: putative acyl-CoA thioester hydrolase [Salmonella]	GO:0042545 GO:0030599	pectinesterase activity 0030599 IEA
AEF07866.1	LBL/MHCII	334	SRGNYRYTDKDLVKY	0.771856	0.24	-0.67	-0.46	-1.67	0.53	2	RefSeq SSP	OmpS1 OmpC, OmpS1	MULTISPECIES: porin OmpS1 porin OmpS1 porin OmpC porin OmpS1, partial	WP_001080680.1	MULTISPECIES: porin OmpS1 [Salmonella]
AEF10030.1	LBL/MHCII	286	SDGTKINYANKVINN	0.61689	0.39	-0.78	-0.23	-0.9	0.12	1	SSP	LamB	Maltoporin (maltose maltodextrin high-affinity receptor) MULTISPECIES: maltoporin maltoporin LamB maltoporin LamB porin MULTISPECIES: maltoporin LamB LamB maltoporin facilitating translocation protein Maltoporin	WP_000973645.1	MULTISPECIES: maltoporin [Salmonella]
MHC = major histocompatibility complex; LBL = linear B lymphocyte; EL = eluted ligands; SVM = support vector machines; GRAVY = grand average of hydropathy
*Start position refers to the amino acid position within the antigenic protein where the epitope begins.
^Protein names and descriptions were extracted from either Salmonella enterica subspecies enterica serovar Typhimurium strain UK-1 GenBank (GCA_000213635.1) and RefSeq (GCF_000213635.1) assembly annotations or from Salmonella proteins with BLAST sequence identities >98% (Similar Salmonella Proteins; SSP).
#Gene ontology information is from UK-1 RefSeq annotation.

## Sheet: ST 6 - Protein Summ
Supplementary Table 6: Usage of multiepitope vaccine construct proteins in other literature summarized by study type
GenBank Accession	Localization	Epitope Type (s)	Protein Name(s)	Annotation Source	Attenuation Target Bacterium/Bacteria	Immunogenic Host(s)	Immunoprotective (Mice) Challenge Bacterium/Bacteria	Immunoprotective (Chicken) Challenge Bacterium/Bacteria	Immunoprotective (Zebrafish) Challenge Bacterium/Bacteria	Reverse Vaccinology Bacterium/Bacteria
AEF05957.1	Outer Membrane	1 Th	BcfC FimD, BcfC	RefSeq SSP						FimD S. Typhi str. CT18 Stenotrophomonas maltophilia Enterobacter cloaceae
AEF06160.1	Periplasmic	1 LBL/CTL	Skp Skp, OmpH	RefSeq SSP	Skp S. Typhimurium	OmpH Chicken		OmpH Pasteruella multicida strain X-73
AEF06480.1	Extracellular	1 Th	None
AEF06499.1	Outer Membrane	1 Th	None
AEF06514.1	Outer Membrane	1 CTL 2 Th	FepA	GenBank		FepA Mice				FepA Salmonella spp.
AEF06556.1	Outer Membrane	1 LBL/Th	PagP PagP	RefSeq SSP	PagP S. Typhimurium
AEF06700.1	Outer Membrane	1 LBL/Th	None
AEF06873.1	Outer Membrane	1 LBL/Th	OmpF OmpF	RefSeq SSP	OmpC S. Typhimurium	OmpF Mice, Chicken	OmpF S. Typhi	OmpF S. Enteritidis		OmpF Typhimurium Enteritidis Dublin Typhi
AEF07457.1	Outer Membrane	1 CTL	PqqU, YncD	SSP	YncD S. Typhi S. Paratyphi A
AEF07866.1	Outer Membrane	1 LBL/Th	OmpS1 OmpC, OmpS1	RefSeq SSP	OmpC S. Typhimurium	OmpC Mice	OmpC S. Typhi			OmpC Typhimurium Enteritidis Dublin Typhi
AEF08184.1	Outer Membrane	1 Th	OmpC OmpC	RefSeq SSP	OmpC S. Typhimurium	OmpC Mice	OmpC S. Typhi			OmpC Typhimurium Enteritidis Dublin Typhi
AEF08270.1	Periplasmic	1 CTL	HisJ HisJ	RefSeq SSP	HisJ Aeromonas veronii
AEF08636.1	Outer Membrane	1 CTL	FepA FepA	GenBank SSP		FepA Mice				FepA Salmonella spp.
AEF08671.1	Periplasmic	1 CTL	ProX ProX	RefSeq SSP	ProX S. Enteritidis
AEF08880.1	Outer Membrane	1 CTL	StdB StdB	RefSeq SSP						StdB S. Typhi str. CT18 S. Typhi XDR H58
AEF09108.1	Periplasmic	1 CTL	OsmY, YraP	SSP	YraP S. Typhimurium
AEF09689.1	Periplasmic	1 Th	PstS PstS PstS	GenBank RefSeq SSP		PstS Chicken		PstS S. Gallinarum biovar Pullorum strain R51		PstS
AEF09827.1	Outer Membrane	1 Th	OmpL OmpL/YshA	RefSeq SSP		OmpL/YshA Mice	OmpL/YshA S. Typhimurium
AEF09863.1	Outer Membrane	1 CTL 1 LBL/Th	None
AEF10024.1	Outer Membrane	CTL	None
AEF10030.1	Outer Membrane	LBL/Th	LamB	SSP		LamB Mice, Zebrafish	LamB S. Paratyphi A CMCC 50973 S. Typhimurium		LamB Vibrio alginolyticus ATCC 33787 V. parahaemolyticus VPL4-90 V. parahaemolyticus ATCC 17802 V. harveyi NBRC 15634 V. mimicus ATCC 33653
AEF10041.1	Outer Membrane	1 Th 1 LBL/CTL	TraF TraF	RefSeq SSP
AEF10350.1	Periplasmic	LBL/CTL	OsmY OsmY	RefSeq SSP
AEF10384.1	Extracellular	LBL/CTL	SthA	SSP		SthA Mice				SthA S. Typhi str. Ty2 S. Typhimurium str. LT2
CTL = cytotoxic T lymphocyte; Th = helper T lymphocyte; LBL = linear B lymphocyte; SSP = Similar Salmonella Proteins
The multiepitope vaccine construct epitope region was created with 28 epitopes representing 24 proteins.
A literature review was conducted to determine if previous studies: discovered bacterial virulence attenuation occurred after disruption of a protein’s gene, determined the protein had immunogenic or immunoprotective properties, or identified the protein as antigenic in other reverse vaccinology pipelines.

## Sheet: ST 7 - ClusPro Scores
Supplementary Table 7: ClusPro scores and model selection procedure results for MEVC docking to Toll-Like Receptor 1/2 heterodimer
Toll Like Receptor (TLR)	Cluster	Members	Center Weighted Score (kcal/mol)	Lowest Energy Weighted Score (kcal/mol)	Chain A Interactions	Chain B Interactions	Visual Confirmation of MEVC Binding to 2Z7X Binding Pocket
TLR1/2 Heterodimer (PDB ID: 2Z7X)	0	48	-739.8	-875.6	FALSE	TRUE	NA
	1	40	-738.8	-931.2	TRUE	FALSE	NA
	2	32	-890.9	-983.9	TRUE	TRUE	TRUE
The multiepitope vaccine construct (MEVC) had epitopes associated with lipoproteins which are the ligands for the toll-like receptor (TLR) 1/2 heterodimer in chickens thus the MEVC was tested for docking to the crystal structure of TLR1/2 heterodimer (RCSB Protein Data Bank 2Z7X) with ClusPro.
ClusPro suggests selection of the docking model that represents the cluster with the most members and provides the energy scores for the center of each cluster which corresponds to the representative model and the model in the cluster that had the lowest energy.
To add biological relevance to the docking model selection, models were (1) tested for interactions with both TLR1 (Chain B) and TLR2 (Chain A) by PDBsum and (2) visually confirmed to have docking at the expected binding pocket by ChimeraX.
The reference crystal structure shows that try-acetylated lipoprotein reference ligand binds to the convex outer surface of both TLR1/2 in the pocket formed by the dimerized complex.
Bolded red text indicates the model chosen for further analysis.

## Sheet: ST 8- TLR-MEVC Dock AA
Supplementary Table 8: PDBsum-identified interaction residues between TLR1/2 heterodimer and multiepitope vaccine construct (MEVC)
Toll-Like Receptor	MEVC Position	MEVC Residue	MEVC Region	MEVC Epitope Protein Identity	MEVC Epitope Protein Start Position*	MEVC Epitope Protein Name
TLR1	731	T	Th - Epitope	AEF06514.1	449	FepA
TLR1	732	P	Th - Epitope	AEF06514.1	449	FepA
TLR1	733	G	Th - Epitope	AEF06514.1	449	FepA
TLR1	735	R	Th - Epitope	AEF06514.1	449	FepA
TLR1	739	H	Th - Epitope	AEF06514.1	449	FepA
TLR1	840	R	DP-LBL - Epitope	AEF06873.1	210	OmpF
TLR1	842	N	DP-LBL - Epitope	AEF06873.1	210	OmpF
TLR1	843	D	DP-LBL - Epitope	AEF06873.1	210	OmpF
TLR1	845	Q	DP-LBL - Epitope	AEF06873.1	210	OmpF
TLR1	847	R	DP-LBL - Epitope	AEF06873.1	210	OmpF
TLR1	880	I	DP-LBL - Epitope	AEF09863.1	127	-
TLR1	881	R	DP-LBL - Epitope	AEF09863.1	127	-
TLR1	884	S	DP-LBL - Epitope	AEF10030.1	286	LamB
TLR1	890	N	DP-LBL - Epitope	AEF10030.1	286	LamB
TLR1	891	Y	DP-LBL - Epitope	AEF10030.1	286	LamB
TLR2	654	Y	Th - Epitope	AEF10041.1	385	TraF
TLR2	729	P	Th - GPGPG Linker
TLR2	732	P	Th - Epitope	AEF06514.1	449	FepA
TLR2	733	G	Th - Epitope	AEF06514.1	449	FepA
TLR2	734	L	Th - Epitope	AEF06514.1	449	FepA
TLR2	735	R	Th - Epitope	AEF06514.1	449	FepA
TLR2	736	F	Th - Epitope	AEF06514.1	449	FepA
TLR2	737	D	Th - Epitope	AEF06514.1	449	FepA
TLR2	738	H	Th - Epitope	AEF06514.1	449	FepA
TLR2	804	F	DP-LBL - Epitope	AEF06556.1	60	PagP
TLR2	806	Y	DP-LBL - Epitope	AEF06556.1	60	PagP
TLR2	853	N	DP-LBL - Epitope	AEF07866.1	334	OmpC, OmpS1
TLR2	854	Y	DP-LBL - Epitope	AEF07866.1	334	OmpC, OmpS1
TLR2	855	R	DP-LBL - Epitope	AEF07866.1	334	OmpC, OmpS1
TLR2	856	Y	DP-LBL - Epitope	AEF07866.1	334	OmpC, OmpS1
TLR2	857	T	DP-LBL - Epitope	AEF07866.1	334	OmpC, OmpS1
TLR2	858	D	DP-LBL - Epitope	AEF07866.1	334	OmpC, OmpS1
TLR2	863	K	DP-LBL - Epitope	AEF07866.1	334	OmpC, OmpS1
TLR2	868	R	DP-LBL - Epitope	AEF09863.1	127	-
CTL = cytotoxic T lymphocyte; Th = helper T lymphocyte; DP-LBL = dual purpose linear B lymphocyte
*MEVC Epitope Protein Start Position refers to the amino acid position within the antigenic protein where the epitope begins.
Please see Supplementary Table 7 for details regarding molecular docking and model selection.

## Sheet: ST 9 - GROMACS Values
Supplementary Table 9: GROMACs pre-production run simulation summary values for ClusPro docking model 2
	Potential Energy Simulation		NVT Simulation		NPT Simulation
Toll-like Receptor	Ending Potential Energy (kj/mol)	Ending Simulation Time (ps)	Mean RMSD (nm)	Mean Temperature (K)	Mean RMSD (nm)	Mean Pressure (bar)
TLR1/2 Heterodimer	36549300	7774	0.022	314.62	0.024	1.08
NVT = constant number of particles, volume, and temperature; NPT = constant number of particles, pressure, and temperature; RMSD = root mean square deviation
Please see Supplementary Table 7 for details regarding molecular docking and model selection.
Molecular dynamics simulations were run to assess the stability of a docking complex with GROMACS (v2023.3) (GROningen Machine for Chemical Simulation).
The simulation was run with poultry-specific physiological parameters or human-specific parameters if poultry-specific parameters were not in the literature.
These parameters include a 1 bar physiological pressure, 0.15 salt concentration, and a 41.5 °C (314.65 K) temperature.
Preliminary pre-production run simulations were run to ensure the system free energy (potential energy simulation), temperature (NVT simulation), and pressure (NPT simulation) stabilized quickly.

## Sheet: ST 10 - IDT Cdn Opt & Cmplxty
Supplementary Table 10: Complexity status, descriptions, and scores for alterantive versions of the multiepitope vaccine construct (MEVC)
Nucleotide Sequence Verision	Status^	Complexity*	Complexity Description	Score
JCAT Optimized Sequence1	Denied	78.3	One or more repeated sequences 8 bases and greater comprise 91.8% of the overall sequence. Solution: Redesign to reduce the repeats to be less than 40% of the sequence.	20.7
			The repeated sequence GGTCCGGGT constitutes 144 bases of the sequence between bases 1501 and 2300. Solution: Redesign to reduce the overall length of this repeat to be below 80 bases within this range.	19.2
			Greater than 88% of the bases within a 90 base window starting at position 476 are part of repeats more than 8 bases long within the entire sequence. Solution: Redesign to reduce or eliminate the density of repeats within this window.	11
			The repeated sequence CCAACTCT exists at the following locations: 20, 308.Solution: Redesign to disrupt instances of the repeat near the terminal end(s) or add extra bases to push the repeat internally.	10
			The repeated sequence GCTGAAGCTGCTG exists at the following locations: 1192, 2791.Solution: Redesign to disrupt instances of the repeat near the terminal end(s) or add extra bases to push the repeat internally.	10
			A repeat with the sequence CGGTCCGGGTCCGGGTCAG exists at the following locations: 2235, 2055. Solution: Modify the sequence to reduce the length of these repeats to less than 13 bases.	4.2
			The repeated sequence GGTCCGGGT constitutes 15% of the sequence between bases 1501 and 2300. Solution: Redesign to reduce the repeat percentage to be below 14% within this range.	2.2
			A hairpin with the stem sequence CCAGGTTGGTG exists at the following locations: 438, 1311. Solution: Modify the sequence to reduce the length of the stem or complement to less than 10 bases.	1
IDT Optimization of JCAT Sequence2	Denied	13.8	A hairpin with the stem sequence ATCGAACGCTT exists at the following locations: 85, 1760. Solution: Modify the sequence to reduce the length of the stem or complement to less than 10 bases.	1
			One or more repeated sequences 8 bases and greater comprise 57.7% of the overall sequence. Solution: Redesign to reduce the repeats to be less than 40% of the sequence.	7.1
			A repeat with the sequence GGTCCGGGTCCGGG exists at the following locations: 2296, 2176. Solution: Modify the sequence to reduce the length of these repeats to less than 13 bases.	0.7
			This sequence contains a window of 20 bases starting at base 1874 with a GC content of 95%. Solution: Redesign this region to have a GC content less than 90%.	5
Manual Curation on IDT3	Accepted	9.6	A hairpin with the stem sequence ATCGAACGCTT exists at the following locations: 85, 1760. Solution: Modify the sequence to reduce the length of the stem or complement to less than 10 bases.	1
			One or more repeated sequences 8 bases and greater comprise 57.7% of the overall sequence. Solution: Redesign to reduce the repeats to be less than 40% of the sequence.	7.1
			A repeat with the sequence GGTCCGGGTCCGGG exists at the following locations: 2296, 2176. Solution: Modify the sequence to reduce the length of these repeats to less than 13 bases.	0.7
			This sequence contains a window of 100 bases starting at base 1915 with a GC content of 70%. Solution: Redesign this region to have a GC content less than 69%.	0.8
JCAT = Java Codon Adaption Tool; IDT = Integrated DNA Technologies
^A “Denied” status that indicates IDT would not attempt to synthesize the sequence due to a “High Complexity” (>10) which indicates there are enough complex nucleotide sequence segments present in the query sequence to impede synthesis. An “Accepted” Status indicates the complexity is below 10 and that IDT will attempt to synthesize the sequence.
*A complexity score > 10 is considered “High”, between 7-10 is “moderate”, and < 7 “Low”.
The JCAT optimized sequence was generated by inputting the Phase III (Construct Creation) multiepitope vaccine construct (MEVC) protein sequence into the JCAT server with Escherichia coli K12 as the host organism.
Note that the MEVC was created by combining protein sequences, thus a nucleotide sequence had not been defined prior to this point.
All "Status", "Complexity", "Complexity Description", and "Score" information is from either the IDT gBlocks™ Gene Fragments Entry or Codon Optimization tools.
The IDT Codon Optimization tool was run with the following parameters: Escherichia coli K12 as the target organism and XhoI and BamHI as restriction enzyme sites to avoid.
1The information in the "JCAT Optimized Sequence" section is from inputting the JCAT optimized sequence into the IDT gBlocks™ Gene Fragments Entry tool to generate an initial nucleotide complexity assessment.
2The information in the "IDT Optimization of JCAT Sequence" is from inputting the JCAT optimized sequence into the IDT Codon Optimization tool which further optimized the sequence based upon complexity.
3The information in the "Manual Curation on IDT" section is regeneration of the IDT Codon Optimization tool complexity measurements after manually curating the IDT optimization of the JCAT optimized sequence.
Bolded text indicates the complexity that was targeted for manual curation (please see Supplementary Table 11 for details). This complexity was initially targeted due to it having the low number of changes (n=2) required to lower complexity below the indicated threshold.

[truncated: 4 more sheets: ST 11 - Cdn Opt Manual Curation, ST 12 - PulseNet Per Serovar, ST 13 - PulseNet Per Iso Src, ST 14 - PulseNet Per Otbk Src]
